# Supplementary material for: A theoretical insight into the formation mechanisms of C/N-ribonucleosides with pyrimidine and ribose
Source: Royal Society of Chemistry journal article supplement (doi:10.1039/c6cp08068e), 2017-01-01
Supplement: c6cp08068e1.pdf [file c6cp08068e1.pdf]

## Supplementary Information for:

# A Theoretical Insight into the Formation Mechanisms of C/N- ribonucleosides with Pyrimidine and Ribose

*Wenjuan Wang, Fang Huang\*, Chuanzhi Sun, Jianbiao Liu, Xiehuang Sheng, Dezhan Chen\**

College of Chemistry, Chemical Engineering and Materials Science, Collaborative Innovation Center of Functionalized Probes for Chemical Imaging in Universities of Shandong, Key Laboratory of Molecular and Nano Probes, Ministry of Education, Shandong Provincial Key Laboratory of Clean Production of Fine Chemicals, Shandong Normal University, Jinan 250014, P. R. China.

### Table of Contents

|                                                                                                                                |       |
|--------------------------------------------------------------------------------------------------------------------------------|-------|
| ■ Scheme S1-S5 Detailed formation mechanisms of C/N-nucleosides                                                                | 1-5   |
| ■ Fig. S1-S2 Optimized structures of key intermediates involved in the reactions                                               | 6     |
| ■ Cartesian Coordinates (Å), Absolute enthalpies and Gibbs free energies<br>at 298.15 K and 1 atm for the Optimized Structures | 7-138 |

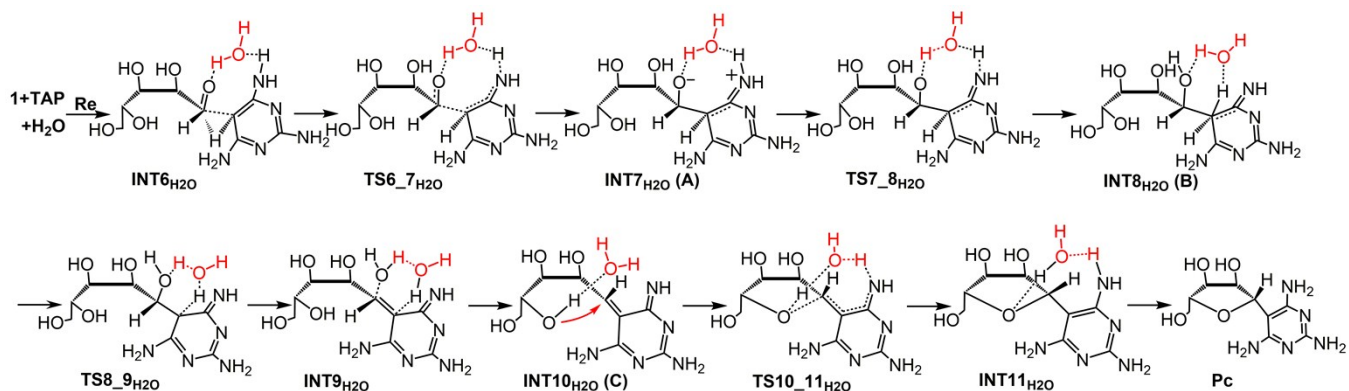

**Scheme S1** Detailed formation mechanisms of **P<sub>C</sub>** from Re-face attack of aldehyde **1** in Path B1.

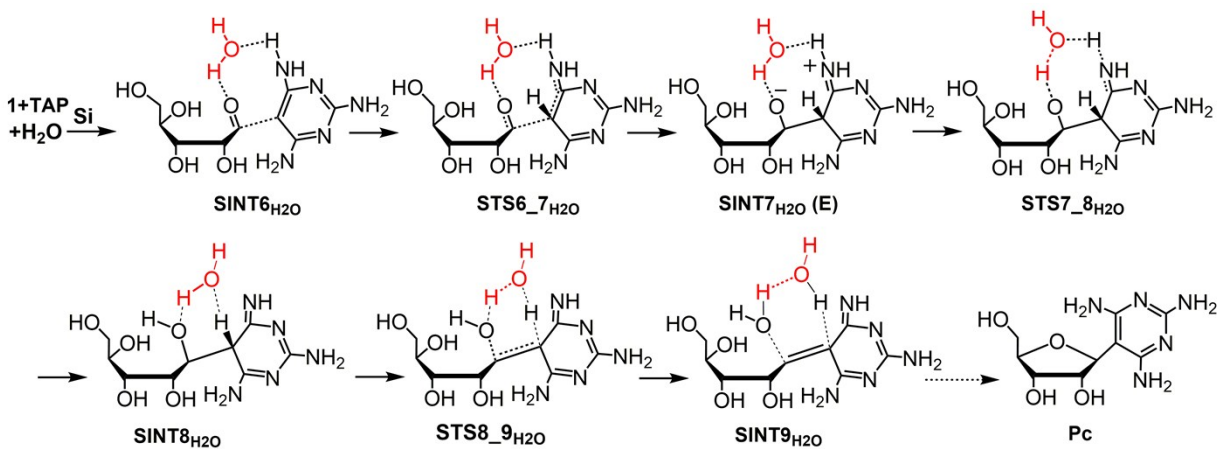

**Scheme S2** Detailed formation mechanisms of **P<sub>C</sub>** from Si-face attack of aldehyde **1** in Path B1.

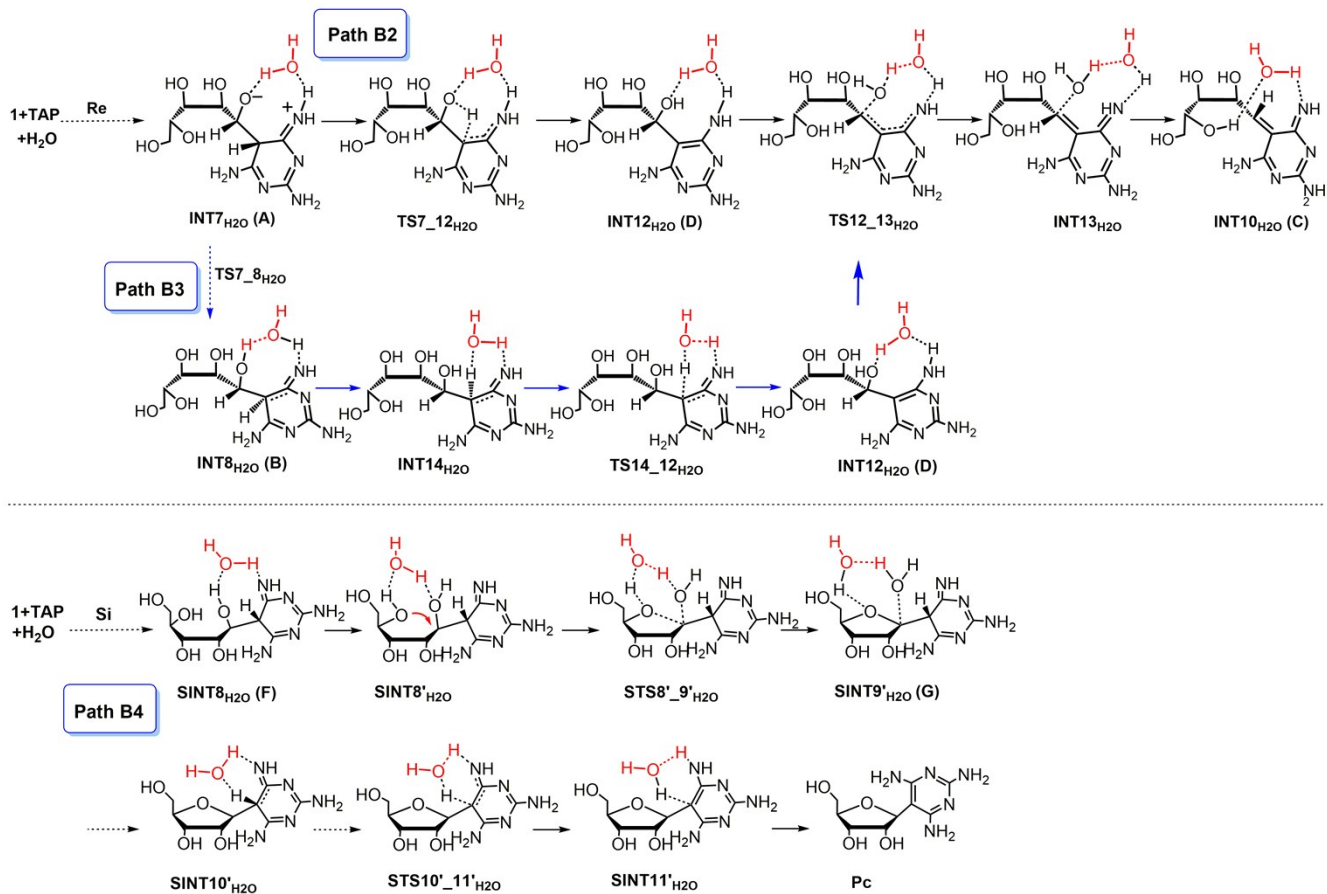

**Scheme S3** Detailed formation mechanisms of **P<sub>C</sub>** in Path B2, B3 and B4, respectively.

**ortho-N-nucleosides**

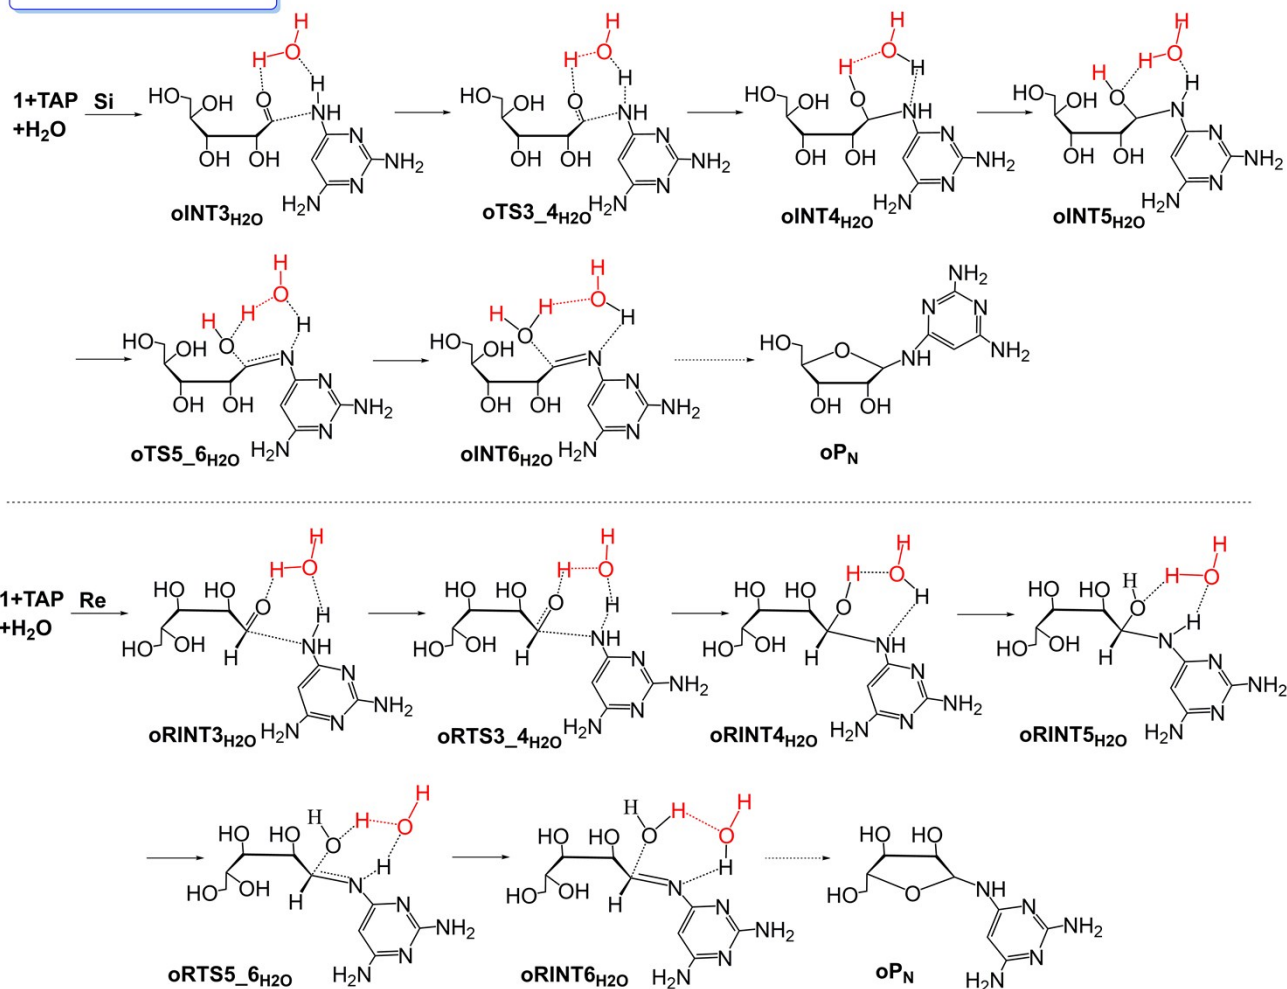

**Scheme S4** Formation mechanisms of  $\text{oP}_N$  from Si- and Re-face of aldehyde **1** with one- $\text{H}_2\text{O}$  assistance, respectively. Two- $\text{H}_2\text{O}$  assisted paths are similar to one- $\text{H}_2\text{O}$  assisted ones.

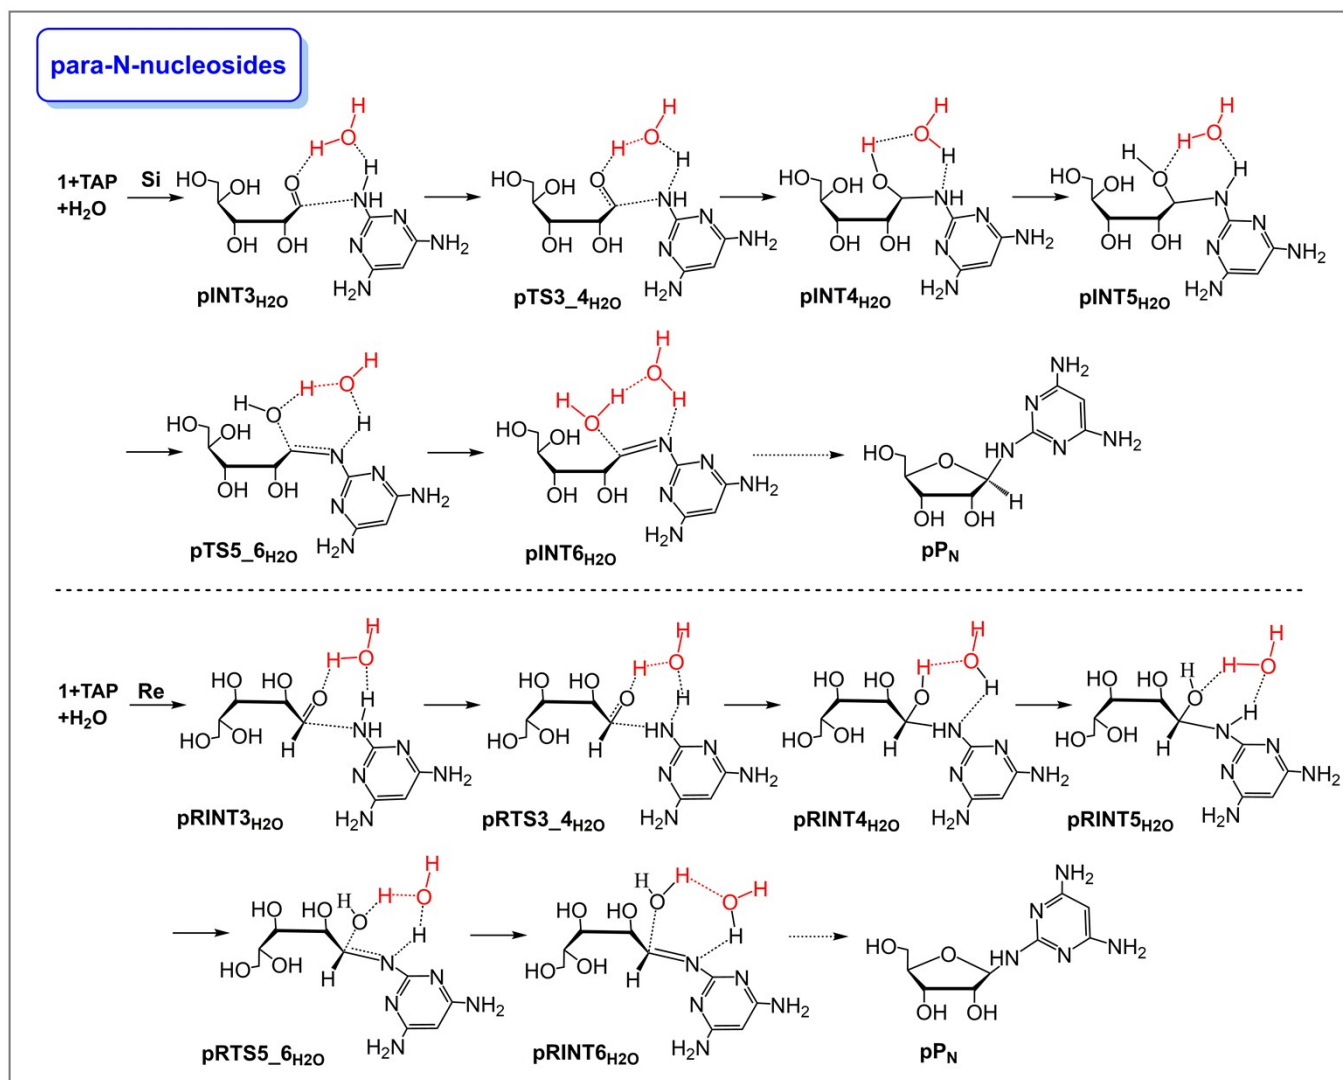

**Scheme S5** Formation mechanisms of **pP<sub>N</sub>** from Si- and Re-face of aldehyde **1** with one-H<sub>2</sub>O assistance, respectively. Two-H<sub>2</sub>O assisted paths are similar to one-H<sub>2</sub>O assisted ones.

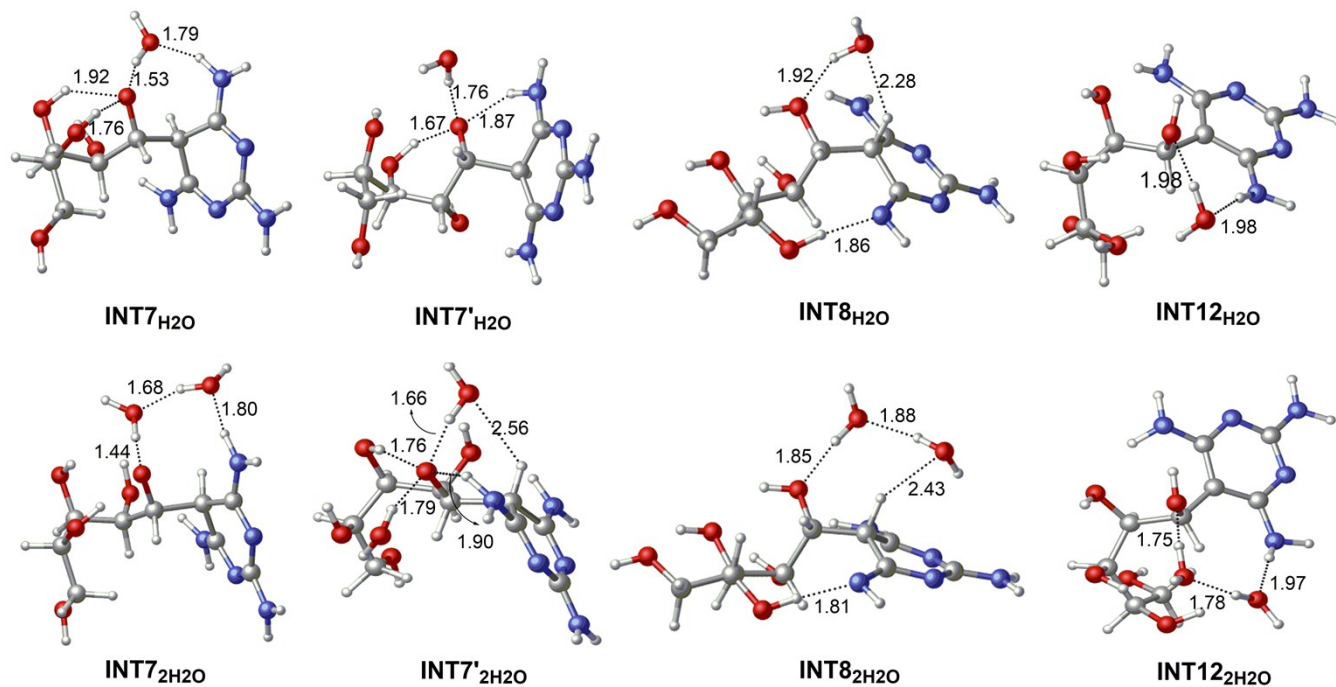

**Fig. S1** Optimized structures of key intermediates involved in the reactions.

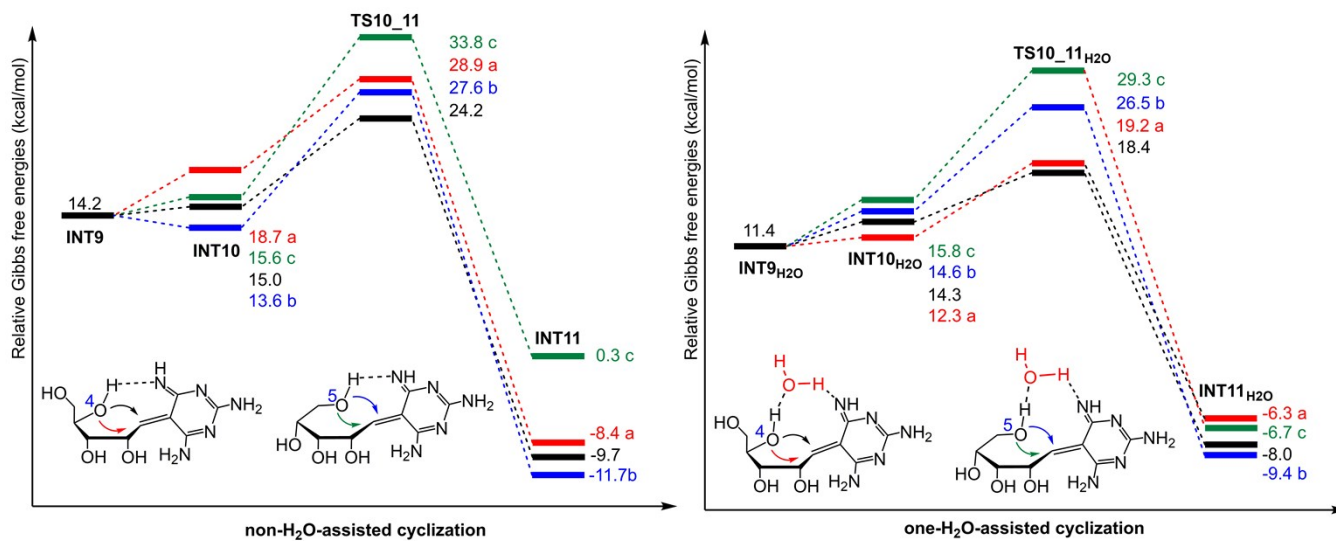

**Fig. S2** Free energy profile of cyclization step which controls the formation of other isomers of **P<sub>c</sub>**. a, b, c represent the formation of  $\alpha$ -ribofuranoside,  $\beta$ -ribofuranoside and  $\alpha$ -ribofuranoside, respectively.

**1. Cartesian coordinates (Å), Absolute enthalpies and Gibbs free energies of optimized geometries at M06-2X/6-311++G(d,p) level.**

|                      |            |            |            |                      |            |            |            |
|----------------------|------------|------------|------------|----------------------|------------|------------|------------|
| <b>1</b>             | C          | -0.6313140 | -0.3318200 | 0.5650280            |            |            |            |
| H = -572.451665 a.u. | O          | 0.4154010  | -1.2785590 | 0.7653750            |            |            |            |
| G = -572.499927 a.u. | C          | 1.8166500  | -0.6616030 | 0.0203840            |            |            |            |
| C                    | -0.7617480 | -0.4467190 | 0.5380310  | C                    | 1.3485290  | 0.7473820  | -0.2910860 |
| O                    | 0.0342320  | -1.5700690 | 0.8605750  | C                    | -0.1527820 | 0.6121490  | -0.5500440 |
| C                    | 2.2497800  | -0.4589250 | -0.1167980 | H                    | -0.7507330 | 0.2421150  | 1.4873340  |
| C                    | 1.3698160  | 0.7727380  | -0.1327020 | H                    | 2.5688570  | -0.7299370 | 0.8139010  |
| C                    | -0.0823850 | 0.4607440  | -0.4992410 | H                    | 1.8776950  | 1.1067030  | -1.1805740 |
| H                    | -0.8726370 | 0.1198310  | 1.4651900  | H                    | -0.3097560 | 0.1477840  | -1.5310220 |
| H                    | 2.8308040  | -0.6060130 | 0.8112330  | O                    | -0.7440680 | 1.8868100  | -0.4825360 |
| H                    | 1.7560820  | 1.4282760  | -0.9269020 | H                    | -1.7006020 | 1.7620840  | -0.4880260 |
| H                    | -0.0868250 | -0.0334330 | -1.4824500 | O                    | 1.5881800  | 1.5575790  | 0.8325950  |
| O                    | -0.7098640 | 1.7279550  | -0.5603190 | H                    | 1.0123770  | 2.3275110  | 0.7563880  |
| H                    | -1.6640790 | 1.5901600  | -0.6153390 | O                    | 1.7796730  | -1.5590170 | -0.9269660 |
| O                    | 1.4612630  | 1.3965020  | 1.1239060  | H                    | 0.7270870  | -1.8578300 | -0.1997150 |
| H                    | 0.8567140  | 2.1468820  | 1.1080150  | C                    | -1.9234290 | -1.0412710 | 0.2103420  |
| O                    | 2.3298730  | -1.2064240 | -1.0559890 | H                    | -2.2780960 | -1.6402190 | 1.0541450  |
| H                    | 0.2315680  | -2.0658580 | 0.0572730  | H                    | -1.7477540 | -1.6991210 | -0.6501930 |
| C                    | -2.1281610 | -0.9378910 | 0.0693710  | O                    | -2.8450870 | -0.0092070 | -0.1196200 |
| H                    | -2.5799600 | -1.5314600 | 0.8691360  | H                    | -3.6977900 | -0.3889700 | -0.3407650 |
| H                    | -1.9913040 | -1.5786120 | -0.8127880 | <b>2</b>             |            |            |            |
| O                    | -2.9351720 | 0.1883380  | -0.2546960 | H = -572.461761 a.u. |            |            |            |
| H                    | -3.8068210 | -0.0998670 | -0.5331390 | G = -572.507355 a.u. |            |            |            |
| <b>1TS1</b>          | C          | 0.6436860  | -0.2807950 | -0.5926500           |            |            |            |
| H = -572.399014 a.u. | O          | -0.4534950 | -1.1398390 | -0.8767240           |            |            |            |
| G = -572.443837 a.u. | C          | -1.6006510 | -0.7160220 | -0.1635510           |            |            |            |

C -1.3205380 0.7101440 0.2897300  
C 0.1821900 0.6314100 0.5506120  
H 0.8601800 0.3364550 -1.4718500  
H -2.4543880 -0.7865920 -0.8408580  
H -1.9007090 0.9645650 1.1802530  
H 0.3596830 0.1469630 1.5177030  
O 0.7499730 1.9190770 0.5114040  
H 1.7074960 1.8072310 0.4934820  
O -1.5925890 1.5797680 -0.7821800  
H -1.0000650 2.3352700 -0.6901250  
O -1.7837640 -1.4922310 0.9910150  
H -1.8455100 -2.4131710 0.7221490  
C 1.8699790 -1.0851400 -0.2180860  
H 2.2097450 -1.6933130 -1.0617590  
H 1.6247270 -1.7402840 0.6258690  
O 2.8452660 -0.1129410 0.1493130  
H 3.6677180 -0.5453780 0.3861810

### 1TS2

H = -572.398479 a.u.

G = -572.443498 a.u.

C -0.9840930 -0.2365710 0.5829910  
O -0.0595010 -1.3490850 0.5585790  
C 1.1093690 -1.0706650 -0.4762920  
C 0.8383210 0.3941070 -0.9044010  
C -0.1786180 0.9672610 0.1230960  
H -1.3368340 -0.1036970 1.6054770  
H 0.4294560 0.4475170 -1.9158250  
H -0.8313460 1.7211340 -0.3272810  
O 0.4899600 1.4757250 1.2501100  
H 1.2811160 1.9250840 0.9279990

O 2.0489180 1.1012520 -0.8622470  
H 2.6418960 0.5490450 -0.3209490  
C -2.1336130 -0.6035540 -0.3397370  
H -2.5773310 -1.5405770 0.0113160  
H -1.7537340 -0.7618790 -1.3587200  
O -3.0491030 0.4695140 -0.2908640  
H -3.8368670 0.2427170 -0.7893640  
O 2.0915650 -1.2057990 0.3899630  
H 0.9097540 -1.2824690 1.1435070  
H 0.9909780 -1.8332040 -1.2544280

### 2'

H = -572.462880 a.u.

G = -572.508408 a.u.

C 0.9707020 0.3596500 0.4491430  
O 0.1168300 1.4826080 0.1767300  
C -1.1204440 1.0650350 -0.3309330  
C -0.8542240 -0.3378390 -0.9066990  
C 0.1653640 -0.8853590 0.1047730  
H 1.2392910 0.3523280 1.5081240  
H -0.3942160 -0.2487220 -1.8946190  
H 0.7998490 -1.6808030 -0.2932150  
O -0.5152650 -1.3125900 1.2755780  
H -1.1295300 -2.0054260 1.0069650  
O -2.0069220 -1.1321610 -1.0080650  
H -2.7032110 -0.6856920 -0.5094080  
C 2.2246330 0.5131090 -0.3938690  
H 2.6584680 1.4971670 -0.1894540  
H 1.9600530 0.4677890 -1.4589100  
O 3.1008410 -0.5373480 -0.0334210  
H 3.9381070 -0.4235520 -0.4870360



O -2.1243860 1.0212460 0.6487120  
H -1.7958890 0.4733040 1.3757240  
H -1.4578920 1.7919890 -1.0689290

### 1TS3

H = -572.398206 a.u.

G = -572.442220 a.u.

C 0.7539970 1.1735350 -0.3410820  
O 1.3686170 1.2362940 0.9401880  
C -1.4466930 -0.7782830 0.2811710  
C -0.0176670 -1.2160260 0.0255000  
C 0.7647280 -0.2579300 -0.8786070  
H 1.3043140 1.8075590 -1.0466300  
H -0.1008120 -2.1832840 -0.4803960  
H 0.3106640 -0.2652860 -1.8741830  
O 2.1062800 -0.6922530 -0.9866150  
H 2.2746840 -1.3017440 -0.2579390  
O 0.6814360 -1.4615270 1.2297960  
H 0.7997050 -0.6121370 1.6773770  
C -0.6462500 1.7334540 -0.2342840  
H -1.0463060 1.8665170 -1.2440340  
H -0.6208850 2.6974330 0.2741540  
O -1.5385360 0.8853590 0.5100490  
H 2.3012930 1.0285440 0.8167700  
O -2.3111780 -0.7614810 -0.6984070  
H -2.3396630 0.4688730 -0.2213300  
H -1.7846420 -1.0861190 1.2799280

### 3

H = -572.471266 a.u.

G = -572.514607 a.u.

C 0.7848990 1.0927540 -0.4894400

O 1.5549730 1.2693920 0.6921370  
C -1.4883650 -0.4714520 0.3489300  
C -0.1435520 -1.1647770 0.1463690  
C 0.7126870 -0.3939600 -0.8630560  
H 1.2386830 1.6503040 -1.3179380  
H -0.3213410 -2.1785710 -0.2182750  
H 0.2605880 -0.4867400 -1.8542970  
O 2.0190970 -0.9353750 -0.9123220  
H 2.1506150 -1.4321510 -0.0954090  
O 0.5357690 -1.2955810 1.3797340  
H 0.7048250 -0.4028170 1.7144620  
C -0.6035780 1.6475270 -0.2270090  
H -1.1609060 1.6937470 -1.1680260  
H -0.5272370 2.6471710 0.1986660  
O -1.3150410 0.8693620 0.7289760  
H 2.4373200 0.9321090 0.5025140  
O -2.2005520 -0.5935350 -0.8540180  
H -3.0924900 -0.2611450 -0.7174100  
H -2.0165750 -0.9365660 1.1848960

### 1TS4

H = -572.400114 a.u.

G = -572.443538 a.u.

C 1.1015060 0.9527030 -0.2615790  
O 1.8841710 0.9361310 0.9181270  
C -1.5587470 -0.5433370 -0.5078410  
C -0.2508260 -1.1482870 -0.0277060  
C 0.8981590 -0.4822100 -0.7807290  
H 1.6921780 1.5068430 -0.9917210  
H -0.2640470 -2.2188330 -0.2657220  
H 0.6132340 -0.4440600 -1.8376190

O 2.0955380 -1.2075010 -0.7060780  
H 2.5844380 -0.8818500 0.0594680  
O -0.1122170 -0.9506460 1.3649760  
H -1.0141780 -0.9385140 1.7233500  
C -0.2373460 1.6638510 0.0111010  
H -0.2059530 2.7099660 -0.2898980  
H -0.4488370 1.6053710 1.0814610  
O -1.3368910 1.0641120 -0.7067160  
H 1.3818830 0.4338840 1.5762120  
O -2.5308270 -0.3976630 0.3665680  
H -2.2366550 0.8544620 -0.0181060  
H -1.8167310 -0.8390610 -1.5319070

**3'**

H = -572.463854 a.u.

G = -572.507255 a.u.

C 1.1117790 0.9839480 -0.1586790  
O 1.8521570 0.8596680 1.0423930  
C -1.5314940 -0.2638090 -0.5590580  
C -0.2797580 -1.0810180 -0.1882610  
C 0.9243850 -0.3957820 -0.8246160  
H 1.7228270 1.6099030 -0.8103460  
H -0.3824690 -2.1012160 -0.5705980  
H 0.7042430 -0.2531740 -1.8864790  
O 2.0925380 -1.1657140 -0.7397710  
H 2.5350270 -0.9225840 0.0825310  
O -0.0728840 -1.1103300 1.2165550  
H -0.9291930 -1.2552520 1.6360310  
C -0.2653650 1.6287140 0.1001780  
H -0.2480350 2.7008250 -0.0862190  
H -0.5498280 1.4594050 1.1438920

O -1.2579800 1.0942710 -0.7704330  
H 1.3228390 0.3087520 1.6359610  
O -2.4559910 -0.4535690 0.4837570  
H -3.2532940 0.0462020 0.2861150  
H -1.9421230 -0.6197880 -1.5082840

**1INT1<sub>H2O</sub>**

H = -648.866680 a.u.

G = -648.920281 a.u.

C 0.8212730 0.0073340 0.7291150  
O -0.0968670 0.8295050 1.4156070  
C -2.1908520 -0.2053210 0.2140720  
C -1.1696340 -1.1971710 -0.2914470  
C 0.2017270 -0.5675780 -0.5541790  
H 1.0570000 -0.8271110 1.3946880  
H -2.6217980 -0.4331380 1.2027540  
H -1.5371550 -1.5623230 -1.2612310  
H 0.0807050 0.2346250 -1.2958660  
O 0.9776010 -1.6324180 -1.0746090  
H 1.9035650 -1.3564000 -1.0643130  
O -1.0817160 -2.2454610 0.6412890  
H -0.3572060 -2.8118000 0.3512640  
O -2.5519770 0.7449470 -0.4383030  
H -1.4157560 2.2271350 -0.8770840  
C 2.0872980 0.8089790 0.4432160  
H 2.4993300 1.1615650 1.3933240  
H 1.8208430 1.6729600 -0.1781170  
O 3.0175610 -0.0328290 -0.2349370  
H 3.8047210 0.4664930 -0.4615200  
O -0.6010730 2.6964880 -0.6409190  
H -0.8048400 3.6331910 -0.6853570

H -0.2365090 1.6354860 0.8917670

**1TS1<sub>H2O</sub>**

H = -648.839239 a.u.

G = -648.888168 a.u.

C -0.6082300 -0.4091190 0.6133660

O 0.7781880 -0.3750470 0.9497650

C 1.5153350 0.8612810 0.0464870

C 0.2597430 1.6465340 -0.2857270

C -0.7911500 0.5738310 -0.5520580

H -1.1775150 -0.0445930 1.4725590

H 2.1104370 1.2916840 0.8606700

H 0.4492860 2.2547400 -1.1756730

H -0.5664230 0.0780890 -1.5038190

O -2.0673430 1.1683280 -0.5676470

H -2.7156470 0.4546570 -0.5913280

O -0.1030200 2.4305630 0.8245400

H -1.0362730 2.6505080 0.7233890

O 2.1237670 0.3124420 -0.9569610

H 2.3851560 -0.9007310 -0.6600520

C -1.0545380 -1.8126020 0.2452330

H -0.9789800 -2.4836320 1.1071370

H -0.4232480 -2.1953480 -0.5651570

O -2.4060230 -1.6662280 -0.1776290

H -2.7549770 -2.5165190 -0.4522940

O 2.2192110 -1.9022360 -0.1346060

H 3.0153760 -2.2265510 0.2928660

H 1.4076090 -1.2644270 0.5882020

**2<sub>H2O</sub>**

H = -648.874993 a.u.

G = -648.927363 a.u.

C -0.4938650 0.5807460 -0.5649930

O 0.8407610 0.1218120 -0.7646860

C 1.0772130 -1.0482310 0.0279790

C -0.3024010 -1.6324030 0.2881100

C -1.1146610 -0.3537330 0.4837720

H -1.0482840 0.4812910 -1.5039940

H 1.7195250 -1.7005850 -0.5675490

H -0.2972620 -2.2756980 1.1714770

H -0.9404290 0.0379650 1.4915680

O -2.4822180 -0.6099510 0.2658600

H -2.9344550 0.2409870 0.2600140

O -0.7258860 -2.3188850 -0.8641730

H -1.6885010 -2.2653600 -0.8889720

O 1.6375190 -0.7162650 1.2569640

H 2.4706280 -0.2517730 1.0861920

C -0.5049990 2.0239620 -0.1063390

H -0.0992260 2.6851450 -0.8789800

H 0.1018050 2.1142520 0.8024580

O -1.8759140 2.3113010 0.1524100

H -1.9661910 3.2097510 0.4757070

O 3.3599700 0.9938460 -0.1450320

H 4.1151270 1.0717580 -0.7304210

H 2.5657010 0.9753400 -0.6994230

**1INT2<sub>H2O</sub>**

H = -648.865852 a.u.

G = -648.919765 a.u.

C 1.1554420 0.8771310 0.1901780

O 0.3608560 1.6249130 -0.6998180

C -1.0689990 -0.6503770 -1.2368230

C -0.1772390 -1.3243050 -0.2083610

|   |            |            |            |                          |             |            |            |
|---|------------|------------|------------|--------------------------|-------------|------------|------------|
| C | 0.4281670  | -0.3177450 | 0.7975690  | O                        | 0.4028830   | 0.4338060  | 1.7843150  |
| H | 1.4905880  | 1.4935470  | 1.0337170  | H                        | 1.0094160   | 1.1866420  | 1.8168530  |
| H | 0.6411100  | -1.8364060 | -0.7284970 | O                        | 1.3371510   | 2.0844010  | -0.0463150 |
| H | 1.1457520  | -0.8760270 | 1.4065650  | H                        | 2.1429510   | 1.5933790  | -0.2934060 |
| O | -0.6129390 | 0.1791790  | 1.6272690  | C                        | -2.2979560  | -0.4722500 | -0.6280070 |
| H | -1.0244220 | -0.5915480 | 2.0361410  | H                        | -2.5813520  | -1.4713870 | -0.9738980 |
| O | -0.9260160 | -2.2532730 | 0.5417260  | H                        | -2.0694620  | 0.1429380  | -1.5081470 |
| H | -1.8405150 | -2.1940790 | 0.2316930  | O                        | -3.3039900  | 0.1182880  | 0.1695930  |
| C | 2.3672280  | 0.4455820  | -0.6252700 | H                        | -4.1306140  | 0.1357850  | -0.3168600 |
| H | 2.9367050  | 1.3411340  | -0.8902780 | O                        | 2.1338350   | -0.1765880 | -0.9971780 |
| H | 2.0199430  | -0.0211790 | -1.5565350 | H                        | 2.2766560   | -1.1672850 | 0.0639030  |
| O | 3.1317680  | -0.4588200 | 0.1506280  | H                        | 0.5364790   | -0.0870030 | -2.2561350 |
| H | 3.9670160  | -0.6284020 | -0.2891230 | O                        | 1.8718840   | -1.8802480 | 0.7250590  |
| O | -2.2703850 | -0.7252740 | -1.1458680 | H                        | 1.7679820   | -1.4147080 | 1.5664780  |
| H | -2.7756970 | 1.7371260  | -0.2467110 | H                        | 0.8122660   | -1.6872060 | 0.1565730  |
| H | -0.5826510 | -0.1091400 | -2.0583330 |                          |             |            |            |
| O | -2.1670980 | 2.1407990  | 0.3789210  | <b>2'</b> <sub>H2O</sub> |             |            |            |
| H | -1.9240680 | 1.4279720  | 0.9879710  | H =                      | -648.876998 | a.u.       |            |
| H | -0.4108440 | 2.0151090  | -0.2532400 | G =                      | -648.928846 | a.u.       |            |
|   |            |            |            | C                        | 1.0401890   | 0.4982810  | -0.2084480 |
|   |            |            |            | O                        | 0.1573840   | 0.4248690  | -1.3302980 |
|   |            |            |            | C                        | -0.7893500  | -0.6084380 | -1.1969220 |
|   |            |            |            | C                        | -0.3701980  | -1.4059670 | 0.0661360  |
|   |            |            |            | C                        | 0.4513100   | -0.3877810 | 0.8788250  |
|   |            |            |            | H                        | 1.0993510   | 1.5356930  | 0.1322600  |
|   |            |            |            | H                        | 0.2650560   | -2.2483410 | -0.2204940 |
|   |            |            |            | H                        | 1.2371690   | -0.8519410 | 1.4795560  |
|   |            |            |            | O                        | -0.4050610  | 0.3795680  | 1.7089430  |
|   |            |            |            | H                        | -1.0409690  | -0.2400950 | 2.0927620  |
|   |            |            |            | O                        | -1.4750870  | -1.8845750 | 0.7861040  |
|   |            |            |            | H                        | -2.2560130  | -1.4806670 | 0.3770690  |

**1TS<sub>2</sub>H<sub>2O</sub>**

H = -648.840798 a.u.

G = -648.889263 a.u.

|   |            |            |            |
|---|------------|------------|------------|
| C | -1.0616710 | -0.6021500 | 0.2462390  |
| O | -0.0116850 | -1.1797690 | -0.5377300 |
| C | 0.8708940  | 0.0198480  | -1.2175590 |
| C | 0.2827220  | 1.2647640  | -0.4770000 |
| C | -0.5036640 | 0.7227620  | 0.7325960  |
| H | -1.2747030 | -1.2598330 | 1.0927430  |
| H | -0.3790220 | 1.8327710  | -1.1364610 |
| H | -1.2931740 | 1.3989290  | 1.0687940  |

C 2.4224250 0.0429890 -0.6509260  
H 2.7106730 0.6264790 -1.5309010  
H 2.3878170 -1.0174610 -0.9365650  
O 3.2996330 0.2570350 0.4374620  
H 4.1944570 0.0326790 0.1749880  
O -2.0901640 -0.1207180 -1.0786380  
H -2.0754530 0.7638280 -0.6583940  
H -0.7689980 -1.2243250 -2.0980220  
O -1.9217590 2.2426470 0.3405000  
H -1.2955710 1.8573560 0.9746050  
H -1.5033390 3.0216740 -0.0314230

**1INT3<sub>H2O</sub>**

H = -648.8640734 a.u.

G = -648.9181304 a.u.

C 0.9026410 1.2587810 -0.0968920  
O 1.7404940 1.3183800 1.0592500  
C -0.7530110 -1.4663770 0.2839750  
C 0.7287660 -1.3292020 -0.0085210  
C 1.0843370 -0.0774420 -0.8288730  
H 1.1924680 2.0409040 -0.8070030  
H 0.9819730 -2.1902030 -0.6378440  
H 0.4600000 -0.0667950 -1.7241750  
O 2.4417360 -0.1791150 -1.2342000  
H 2.9164510 -0.6787070 -0.5607790  
O 1.5024970 -1.4424610 1.1654860  
H 1.5796240 -0.5637760 1.5654990  
C -0.5126020 1.5433140 0.3730570  
H -0.5197380 2.5242160 0.8622800  
H -0.8127320 0.8101700 1.1363280  
O -1.3553960 1.5090840 -0.7495330

H 2.6402790 1.4925100 0.7686210  
O -1.5797760 -1.5967220 -0.5816150  
H -3.2376640 -0.7121220 -0.0684580  
H -1.0286680 -1.4744510 1.3564720  
O -3.5188640 0.1234490 0.3311840  
H -2.2408820 1.2410690 -0.4646090  
H -4.4774280 0.1418190 0.3126240

**1TS3<sub>H2O</sub>**

H = -648.836257 a.u.

G = -648.884539 a.u.

C 1.1123020 1.3182420 -0.0031740  
O 1.4819760 1.0391140 1.3471640  
C -0.8691240 -0.7375800 0.2612250  
C 0.4958880 -1.1323090 -0.3045690  
C 1.3009270 0.0665350 -0.8599200  
H 1.7584950 2.1098670 -0.3948030  
H 0.3294730 -1.8658170 -1.0941670  
H 0.9573560 0.2807140 -1.8758060  
O 2.6773770 -0.2469380 -0.9005880  
H 2.7972140 -1.0668870 -0.4048630  
O 1.2406710 -1.8024440 0.7008100  
H 1.2681610 -1.2225860 1.4723760  
C -0.3446700 1.7840910 -0.0298430  
H -0.4689030 2.6227400 -0.7160090  
H -0.6459160 2.0889120 0.9771950  
O -1.1717890 0.7260220 -0.5083420  
H 2.4397020 0.9355790 1.3588550  
O -1.8711180 -1.4957080 0.0111680  
H -2.9170630 -0.6829710 0.1189790  
H -0.7718560 -0.3403420 1.2901940

O -3.4193310 0.3128970 0.0721430  
H -2.3003010 0.7729560 -0.3096180  
H -4.1205960 0.3104260 -0.5834850

**3<sub>H2O</sub>**

H = -648.874886 a.u.

G = -648.925915 a.u.

C -1.1283870 -1.3374820 -0.0573200  
O -1.4019300 -1.1458060 1.3309940  
C 0.8318520 0.6019800 0.0908090  
C -0.5723940 1.1036680 -0.2665750  
C -1.4410080 -0.0511990 -0.8147090  
H -1.7521100 -2.1515180 -0.4396150  
H -0.4688770 1.8823800 -1.0236140  
H -1.2095760 -0.1985470 -1.8736560  
O -2.8140430 0.2464580 -0.6791560  
H -2.8807880 1.0533940 -0.1529010  
O -1.1982410 1.7213300 0.8436070  
H -1.1759460 1.0877880 1.5717280  
C 0.3529440 -1.6888190 -0.2194370  
H 0.4844640 -2.4573550 -0.9804880  
H 0.7326340 -2.0605470 0.7399440  
O 1.1261320 -0.5781290 -0.6613520  
H -2.3572470 -1.0500830 1.4144770  
O 1.7479710 1.5767580 -0.2238510  
H 2.6184250 1.2821710 0.0840050  
H 0.8691680 0.3296310 1.1591550  
O 3.6966000 -0.3391120 0.3124480  
H 3.0579300 -0.7503890 -0.2876320  
H 4.5719780 -0.5877960 0.0104740

**1INT4<sub>H2O</sub>**

H = -648.868434 a.u.

G = -648.921319 a.u.

C -1.1187500 -1.2127290 -0.0038740  
O -1.8840530 -1.1914650 1.1879320  
C 0.8575580 1.3572050 -0.5737260  
C -0.6064020 1.3014130 -0.2122430  
C -1.3360750 0.0825810 -0.8038230  
H -1.5312330 -2.0272930 -0.6043990  
H -1.0597360 2.1802920 -0.6994150  
H -0.9608540 -0.0634180 -1.8198720  
O -2.7155140 0.3479020 -0.9015890  
H -3.1212930 0.0465770 -0.0790410  
O -0.7787930 1.3764540 1.1853470  
H 0.0501030 1.7046330 1.5608600  
C 0.3490050 -1.4918290 0.2915900  
H 0.4527800 -2.5148470 0.6663740  
H 0.7015890 -0.8094130 1.0765270  
O 1.0730190 -1.2953390 -0.9086950  
H -1.5673350 -0.4438990 1.7117810  
O 1.7013740 1.5706230 0.2667900  
H 3.2759310 0.3699020 0.2818430  
H 1.1103570 1.2546690 -1.6394130  
O 3.5149910 -0.5576060 0.1527570  
H 2.0187200 -1.3035550 -0.6969650  
H 4.4707590 -0.6180380 0.1938420

**1TS4<sub>H2O</sub>**

H = -648.843082 a.u.

G = -648.889682 a.u.

C 1.2270290 1.1639290 -0.1436210  
O 1.9884830 1.2187990 1.0462310

|                         |             |            |            |                                        |             |            |            |
|-------------------------|-------------|------------|------------|----------------------------------------|-------------|------------|------------|
| C                       | -1.0195360  | -0.8987340 | -0.4917770 | H                                      | 0.5063290   | -2.1142650 | -0.7927140 |
| C                       | 0.4448770   | -1.2176680 | -0.1656330 | H                                      | 0.9675990   | 0.0826650  | -1.9228950 |
| C                       | 1.3775330   | -0.2094900 | -0.8267140 | O                                      | 2.6631770   | -0.5945120 | -1.0637150 |
| H                       | 1.6519160   | 1.9272430  | -0.7972280 | H                                      | 3.1383320   | -0.3647750 | -0.2558660 |
| H                       | 0.6608540   | -2.2191690 | -0.5559860 | O                                      | 0.8081430   | -1.3022720 | 1.0825440  |
| H                       | 1.0783160   | -0.1208200 | -1.8754450 | H                                      | 0.0519300   | -1.6715140 | 1.5552990  |
| O                       | 2.7181400   | -0.6237920 | -0.8178400 | C                                      | -0.1340090  | 1.4296200  | 0.3981210  |
| H                       | 3.1117100   | -0.3165000 | 0.0077310  | H                                      | -0.3788880  | 2.4904030  | 0.3799480  |
| O                       | 0.6298870   | -1.1927000 | 1.2374580  | H                                      | -0.2468470  | 1.0622010  | 1.4229550  |
| H                       | -0.2336720  | -1.4316600 | 1.6130240  | O                                      | -1.0781210  | 0.7837290  | -0.4530410 |
| C                       | -0.2520010  | 1.4547630  | 0.1510140  | H                                      | 1.8924780   | 0.3629610  | 1.5656530  |
| H                       | -0.4965240  | 2.5082280  | 0.0179930  | O                                      | -1.7304680  | -1.1379060 | 0.6943630  |
| H                       | -0.4919600  | 1.1583100  | 1.1760820  | H                                      | -2.6620850  | -0.8911460 | 0.5873510  |
| O                       | -1.0811610  | 0.7067210  | -0.7562850 | H                                      | -1.4658340  | -0.9591190 | -1.3402950 |
| H                       | 1.6428510   | 0.5231880  | 1.6239010  | O                                      | -3.7895870  | 0.4299770  | -0.2294460 |
| O                       | -1.8496360  | -1.1986680 | 0.4707640  | H                                      | -3.0484370  | 1.0021160  | -0.4736240 |
| H                       | -2.8640440  | -0.3452280 | 0.3426450  | H                                      | -4.5697360  | 0.7373000  | -0.6930000 |
| H                       | -1.2923150  | -1.2046890 | -1.5111310 |                                        |             |            |            |
| O                       | -3.3007070  | 0.6328750  | 0.0481690  | <b>1INT1<sub>2</sub>H<sub>2</sub>O</b> |             |            |            |
| H                       | -2.1924150  | 0.8740930  | -0.5068400 | H =                                    | -725.280300 | a.u.       |            |
| H                       | -4.0821790  | 0.5443240  | -0.5023330 | G =                                    | -725.341643 | a.u.       |            |
|                         |             |            |            | C                                      | 1.0906390   | 0.4677340  | 0.6534230  |
| <b>3'<sub>H2O</sub></b> |             |            |            | O                                      | -0.0886030  | 0.4667560  | 1.4237100  |
| H =                     | -648.876797 | a.u.       |            | C                                      | -0.9990840  | -1.7262180 | 0.4060330  |
| G =                     | -648.926860 | a.u.       |            | C                                      | 0.3759450   | -1.8054820 | -0.2113750 |
| C                       | 1.3063630   | 1.1702160  | -0.0838220 | C                                      | 0.9255330   | -0.4237850 | -0.5856590 |
| O                       | 2.2027960   | 1.0905720  | 1.0092470  | H                                      | 1.8815210   | 0.0386060  | 1.2748800  |
| C                       | -1.0222230  | -0.6350060 | -0.3944620 | H                                      | -1.0681420  | -2.0104640 | 1.4671470  |
| C                       | 0.4233450   | -1.1528940 | -0.2763540 | H                                      | 0.2759290   | -2.3690920 | -1.1492140 |
| C                       | 1.3493920   | -0.1269350 | -0.9195150 | H                                      | 0.2216090   | 0.0483160  | -1.2872100 |
| H                       | 1.6704320   | 1.9964750  | -0.6962300 | O                                      | 2.1677350   | -0.7001950 | -1.2063350 |

|   |            |            |            |   |            |            |            |
|---|------------|------------|------------|---|------------|------------|------------|
| H | 2.6660180  | 0.1263130  | -1.2539920 | O | 1.3134610  | -2.2014170 | 1.0003670  |
| O | 1.2281250  | -2.4663730 | 0.6906600  | H | 2.2684100  | -2.0771430 | 0.9560960  |
| H | 2.1191290  | -2.3952570 | 0.3286630  | O | -1.3371120 | -1.0425370 | -1.0594680 |
| O | -1.9669690 | -1.4127490 | -0.2463490 | H | -2.5481150 | -0.6984690 | -0.8881960 |
| H | -3.4725350 | -0.3548850 | -0.4458140 | C | 0.6451820  | 2.0231710  | -0.0101150 |
| C | 1.4572550  | 1.9024780  | 0.2872140  | H | 0.2724530  | 2.7084200  | 0.7580350  |
| H | 1.5921510  | 2.4742730  | 1.2105520  | H | -0.0637340 | 2.0039740  | -0.8462580 |
| H | 0.6367480  | 2.3433480  | -0.2912750 | O | 1.9504950  | 2.3905200  | -0.4437190 |
| O | 2.6624240  | 1.8812050  | -0.4766290 | H | 1.9309440  | 3.2695180  | -0.8270400 |
| H | 2.8733620  | 2.7678240  | -0.7755350 | O | -3.5443080 | -0.2247050 | -0.6077760 |
| O | -3.9477740 | 0.4729490  | -0.6203810 | H | -4.0202440 | 0.0445550  | -1.3956130 |
| H | -4.3037950 | 0.3902030  | -1.5073570 | H | -3.0710470 | 0.7191470  | 0.1398950  |
| H | -2.6711810 | 1.6250240  | -0.2041200 | O | -2.4368380 | 1.3675200  | 0.8003920  |
| O | -1.9068650 | 2.1274430  | 0.1431770  | H | -2.8693100 | 1.4945900  | 1.6486670  |
| H | -2.2827830 | 2.8338660  | 0.6732510  | H | -1.3709640 | 0.7227700  | 0.8948040  |
| H | -0.7543430 | 1.0412780  | 0.9993830  |   |            |            |            |

**1TS1<sub>2H2O</sub>**

H = -725.263167 a.u.

G = -725.317619 a.u.

|   |            |            |            |
|---|------------|------------|------------|
| C | 0.8091780  | 0.6173510  | 0.5368350  |
| O | -0.4388450 | 0.0445280  | 0.9179110  |
| C | -0.6931240 | -1.3304510 | 0.0234130  |
| C | 0.7721380  | -1.6772450 | -0.1878380 |
| C | 1.4016700  | -0.3301570 | -0.5203360 |
| H | 1.4684330  | 0.6258690  | 1.4094000  |
| H | -1.1963340 | -1.9216450 | 0.7982240  |
| H | 0.8546250  | -2.3814600 | -1.0209580 |
| H | 1.0837890  | -0.0247070 | -1.5225400 |
| O | 2.8043890  | -0.4290070 | -0.4338120 |
| H | 3.1608920  | 0.4593580  | -0.5474150 |

**2<sub>2H2O</sub>**

H = -725.291817 a.u.

G = -725.351454 a.u.

|   |            |            |            |
|---|------------|------------|------------|
| C | 0.8509850  | 0.6403370  | 0.4201190  |
| O | -0.5101920 | 0.2325120  | 0.5223330  |
| C | -0.6999210 | -1.0232790 | -0.1556890 |
| C | 0.6787270  | -1.6673360 | -0.1382700 |
| C | 1.5601860  | -0.4488510 | -0.3993430 |
| H | 1.2904190  | 0.6737750  | 1.4226810  |
| H | -1.4452660 | -1.5741590 | 0.4233950  |
| H | 0.7656030  | -2.4335600 | -0.9122240 |
| H | 1.5304110  | -0.2003740 | -1.4655060 |
| O | 2.8785360  | -0.7000260 | 0.0286160  |
| H | 3.3603000  | 0.1326420  | -0.0297160 |
| O | 0.9187750  | -2.1860660 | 1.1481180  |



|                       |            |            |            |                       |            |            |            |
|-----------------------|------------|------------|------------|-----------------------|------------|------------|------------|
| H                     | 1.8716620  | -2.1572520 | 1.2932570  | O                     | 0.5414200  | -0.4492240 | -1.3209730 |
| O                     | -1.0784780 | -0.8300610 | -1.4697920 | H                     | -0.3750960 | -0.5245950 | -1.0203840 |
| H                     | -2.0108540 | -0.5474240 | -1.4686340 | C                     | 1.7917490  | 1.8639790  | 0.9810900  |
| C                     | 0.9625680  | 1.9985560  | -0.2402480 | H                     | 2.5805630  | 2.6171590  | 1.0616400  |
| H                     | 0.4870810  | 2.7731350  | 0.3700190  | H                     | 1.2202490  | 1.8692350  | 1.9174080  |
| H                     | 0.4733940  | 1.9583380  | -1.2201410 | O                     | 0.9640980  | 2.2251960  | -0.1091460 |
| O                     | 2.3641380  | 2.2234080  | -0.3651630 | H                     | 0.6233610  | 1.4189530  | -0.5259490 |
| H                     | 2.5227090  | 3.0552860  | -0.8153290 | C                     | -3.8057320 | -0.4968750 | -0.3719170 |
| O                     | -3.6618380 | -0.0802740 | -0.8764650 | N                     | -3.0905800 | -1.3630150 | 0.3534430  |
| H                     | -4.3632320 | 0.3157350  | -1.3959400 | C                     | -1.9996290 | -0.8581160 | 0.9436150  |
| H                     | -3.5947310 | 0.4308580  | -0.0483830 | C                     | -1.6230440 | 0.4798730  | 0.8044000  |
| O                     | -2.9021020 | 1.1830070  | 1.4300150  | C                     | -2.4402300 | 1.2732110  | -0.0079460 |
| H                     | -3.1037330 | 0.8857850  | 2.3193160  | N                     | -3.5399680 | 0.7920330  | -0.6008450 |
| H                     | -1.9697350 | 0.9506650  | 1.2664910  | H                     | -0.7661690 | 0.8820690  | 1.3223910  |
| <b>INT1</b>           |            |            |            | N                     | -4.9152100 | -1.0026310 | -0.9899880 |
| H = -1002.756116 a.u. |            |            |            | H                     | -5.2620550 | -1.8802420 | -0.6398500 |
| G = -1002.824138 a.u. |            |            |            | H                     | -5.5824520 | -0.3304670 | -1.3307280 |
| C                     | 2.4315340  | 0.4955020  | 0.8143180  | N                     | -1.2568020 | -1.7157730 | 1.7025650  |
| O                     | 1.4187380  | -0.5206580 | 0.8284160  | H                     | -1.4927890 | -2.6927560 | 1.6383570  |
| C                     | 1.3636090  | -1.1605850 | -0.4301890 | H                     | -0.3042260 | -1.4620510 | 1.9213250  |
| C                     | 2.7843300  | -1.0905770 | -0.9667770 | N                     | -2.1511170 | 2.5901280  | -0.2137340 |
| C                     | 3.1910780  | 0.3223550  | -0.5132810 | H                     | -2.6680010 | 3.0391920  | -0.9532400 |
| H                     | 3.1165570  | 0.3062720  | 1.6454370  | H                     | -1.1983220 | 2.8936330  | -0.0617940 |
| H                     | 1.0035990  | -2.1772670 | -0.2667140 | <b>TS1_2</b>          |            |            |            |
| H                     | 2.8062830  | -1.2188250 | -2.0526880 | H = -1002.664186 a.u. |            |            |            |
| H                     | 2.8567520  | 1.0634080  | -1.2434200 | G = -1002.732694 a.u. |            |            |            |
| O                     | 4.5839400  | 0.4310300  | -0.2754950 | C                     | 2.3490890  | -0.4352160 | -1.0112990 |
| H                     | 5.0142680  | 0.7999090  | -1.0502060 | O                     | 0.8584960  | -0.3363670 | -1.1137520 |
| O                     | 3.5566650  | -2.0622220 | -0.3111120 | C                     | 0.4067270  | 0.6788540  | -0.5393250 |
| H                     | 4.4223320  | -1.6743960 | -0.1350670 | C                     | 1.4332150  | 1.5279980  | 0.1566440  |

|   |            |            |            |             |              |            |            |
|---|------------|------------|------------|-------------|--------------|------------|------------|
| C | 2.7542630  | 0.7411810  | -0.1176370 | H           | -3.3617350   | 2.7256950  | 1.2867510  |
| H | 2.6508280  | -0.2330060 | -2.0406440 | H           | -2.2124230   | 2.2003800  | 2.4398090  |
| H | -0.6164640 | 0.9687380  | -0.7521710 | <b>INT2</b> |              |            |            |
| H | 1.2082760  | 1.5822030  | 1.2200470  | H =         | -1002.741050 | a.u.       |            |
| H | 3.1751380  | 0.3703110  | 0.8120810  | G =         | -1002.807324 | a.u.       |            |
| O | 3.6635810  | 1.5651430  | -0.8316000 | C           | 2.1702950    | -0.1275040 | -1.2926390 |
| H | 4.4444140  | 1.7198690  | -0.2958290 | O           | 0.8929870    | -0.6160830 | -0.8585030 |
| O | 1.4001080  | 2.7928480  | -0.4524430 | C           | 0.2051660    | 0.4292920  | -0.2112170 |
| H | 2.2326730  | 2.8918920  | -0.9365530 | C           | 1.3363890    | 1.1294230  | 0.5618270  |
| O | 1.2870140  | -0.8017490 | 1.7849980  | C           | 2.4328020    | 1.1677330  | -0.5025270 |
| H | 1.3820300  | -0.7128870 | 2.7363190  | H           | 2.1170200    | 0.1004110  | -2.3648790 |
| C | 2.7892680  | -1.8509320 | -0.5887170 | H           | -0.2233850   | 1.1204990  | -0.9541040 |
| H | 3.6380580  | -2.1124840 | -1.2294480 | H           | 1.6444920    | 0.4707350  | 1.3778880  |
| H | 1.9593360  | -2.5216610 | -0.8662430 | H           | 3.4324500    | 1.1881230  | -0.0649890 |
| O | 3.1756990  | -1.9661940 | 0.7280910  | O           | 2.1813920    | 2.3465230  | -1.2657780 |
| H | 2.3947490  | -1.5557910 | 1.2984020  | H           | 2.9403410    | 2.5441420  | -1.8182550 |
| C | -3.2857480 | -0.3839540 | -0.8119330 | O           | 1.0210950    | 2.3918970  | 1.0968410  |
| N | -2.4852510 | -1.4126350 | -0.5382350 | H           | 1.1573310    | 3.0359850  | 0.3889260  |
| C | -1.6456090 | -1.2476480 | 0.4999670  | O           | 1.3570230    | -2.1107250 | 1.8107470  |
| C | -1.6259160 | -0.0534770 | 1.2529350  | H           | 1.4548360    | -2.7249980 | 2.5410470  |
| C | -2.5303620 | 0.9351470  | 0.8659250  | C           | 3.2064380    | -1.2066340 | -1.0233450 |
| N | -3.3503300 | 0.7990570  | -0.1811020 | H           | 4.1298100    | -0.9516810 | -1.5528930 |
| H | -0.9504690 | 0.0563780  | 2.0881270  | H           | 2.8310980    | -2.1538870 | -1.4293810 |
| N | -4.1156260 | -0.5294080 | -1.8869110 | O           | 3.5206490    | -1.3050850 | 0.3402950  |
| H | -4.2567180 | -1.4683900 | -2.2207740 | H           | 2.7540080    | -1.6683010 | 0.8246580  |
| H | -4.8780150 | 0.1233720  | -1.9598280 | C           | -3.2834420   | -0.2378090 | -0.6852500 |
| N | -0.7877630 | -2.2387980 | 0.7974600  | N           | -2.5907670   | -1.3436100 | -0.7150450 |
| H | -0.7555880 | -3.0070560 | 0.1458190  | C           | -1.5141100   | -1.4198850 | 0.1313560  |
| H | 0.0643660  | -1.9417360 | 1.3126160  | C           | -0.9249500   | -0.1329750 | 0.6880420  |
| N | -2.5563430 | 2.1550740  | 1.4944760  | C           | -2.0131470   | 0.9086790  | 0.8160060  |

|   |            |            |            |   |            |            |            |
|---|------------|------------|------------|---|------------|------------|------------|
| N | -3.1170480 | 0.8643350  | 0.1387420  | O | -1.9056050 | -1.8271760 | -1.3619330 |
| H | -0.5015840 | -0.3548750 | 1.6702600  | H | -0.9556080 | -2.0835320 | -1.2671060 |
| N | -4.3277490 | -0.1070840 | -1.5287820 | C | 3.2425390  | -0.2005600 | 0.4359520  |
| H | -4.5894210 | -0.8936060 | -2.0985250 | N | 2.5743580  | -1.3154320 | 0.3132000  |
| H | -4.9392630 | 0.6836290  | -1.4246900 | C | 1.3734910  | -1.2622470 | -0.3457880 |
| N | -0.9549880 | -2.5203640 | 0.4640100  | C | 0.7323760  | 0.0860690  | -0.6248160 |
| H | -1.4173020 | -3.2961020 | -0.0084660 | C | 1.7424540  | 1.2014410  | -0.5425030 |
| H | 0.5380360  | -2.3858460 | 1.3129850  | N | 2.9237180  | 1.0662860  | -0.0308000 |
| N | -1.7946810 | 1.9268710  | 1.6627000  | H | 0.3547560  | 0.0404750  | -1.6490050 |
| H | -2.4685350 | 2.6783500  | 1.6434110  | N | 4.4219750  | -0.2296450 | 1.0876490  |
| H | -0.8411150 | 2.1522420  | 1.9232940  | H | 4.7728900  | -1.1111650 | 1.4208610  |

### INT3

H = -926.324434 a.u.

G = -926.385080 a.u.

|   |            |            |            |
|---|------------|------------|------------|
| C | -2.3272410 | -0.8845080 | 0.8368860  |
| O | -0.9319590 | -0.6717630 | 1.0527160  |
| C | -0.4686310 | 0.4373820  | 0.3192360  |
| C | -1.6754650 | 0.9888310  | -0.4771980 |
| C | -2.8611620 | 0.4520350  | 0.3201170  |
| H | -2.7786700 | -1.1271090 | 1.8059680  |
| H | -0.1400050 | 1.2001970  | 1.0363920  |
| H | -1.6979440 | 0.5572290  | -1.4758880 |
| H | -3.7631910 | 0.3426140  | -0.2887930 |
| O | -3.0597940 | 1.3964280  | 1.3657670  |
| H | -3.7702010 | 1.1071450  | 1.9423660  |
| O | -1.6533710 | 2.3917090  | -0.6190140 |
| H | -2.0052260 | 2.7652160  | 0.1998020  |
| C | -2.5210020 | -2.0564630 | -0.1212840 |
| H | -3.5919700 | -2.2191690 | -0.2859570 |
| H | -2.1113800 | -2.9511670 | 0.3621990  |

|   |           |            |            |
|---|-----------|------------|------------|
| H | 4.9786180 | 0.6057970  | 1.1309800  |
| N | 0.7456660 | -2.2988790 | -0.7560060 |
| H | 1.2681270 | -3.1355700 | -0.4993740 |
| N | 1.3473960 | 2.3998020  | -1.0032020 |
| H | 1.9652820 | 3.1811410  | -0.8429460 |
| H | 0.3644190 | 2.5874990  | -1.1692740 |

### TS3\_Pc

H = -926.240535 a.u.

G = -926.301920 a.u.

|   |            |            |            |
|---|------------|------------|------------|
| C | -2.3857080 | -0.7446240 | 0.9390790  |
| O | -0.9572850 | -0.7079660 | 0.9401220  |
| C | -0.4744990 | 0.4542390  | 0.2908200  |
| C | -1.6390010 | 0.9382470  | -0.5908900 |
| C | -2.8595110 | 0.5351140  | 0.2360650  |
| H | -2.7417920 | -0.7489350 | 1.9764910  |
| H | -0.2824430 | 1.2337890  | 1.0438790  |
| H | -1.6419530 | 0.3897510  | -1.5329880 |
| H | -3.7459410 | 0.3659940  | -0.3816310 |
| O | -3.0730070 | 1.6072620  | 1.1489920  |

|           |             |            |            |   |            |            |            |
|-----------|-------------|------------|------------|---|------------|------------|------------|
| H         | -3.8876560  | 1.4682050  | 1.6363220  | C | 2.8651210  | 0.4182780  | 0.3075310  |
| O         | -1.5699710  | 2.3153270  | -0.8844710 | H | 3.3593190  | -0.9534450 | -1.2936390 |
| H         | -1.9927790  | 2.7758730  | -0.1475230 | H | 0.6983220  | 1.3228870  | -1.3573860 |
| C         | -2.8030040  | -2.0320510 | 0.2428620  | H | 1.0738560  | 0.4551040  | 1.5137170  |
| H         | -3.8934590  | -2.0971960 | 0.1925850  | H | 3.4364490  | 0.2079920  | 1.2158630  |
| H         | -2.4363360  | -2.8794630 | 0.8341190  | O | 3.4887450  | 1.4379810  | -0.4654350 |
| O         | -2.3142960  | -2.0805120 | -1.0767610 | H | 4.4152680  | 1.2295300  | -0.6016940 |
| H         | -1.3463040  | -2.1238380 | -1.0285990 | O | 1.4393240  | 2.3369240  | 0.8329470  |
| C         | 3.3574460   | -0.2890260 | 0.4014300  | H | 2.1663430  | 2.7085480  | 0.3157060  |
| N         | 2.6330410   | -1.4035140 | 0.2430210  | C | 2.5347570  | -2.1083260 | 0.3226870  |
| C         | 1.4626560   | -1.1829360 | -0.3386340 | H | 3.5224970  | -2.2981550 | 0.7539740  |
| C         | 0.8198120   | 0.1494830  | -0.4786340 | H | 2.2916110  | -2.9537270 | -0.3331580 |
| C         | 1.8162510   | 1.1942460  | -0.3920880 | O | 1.6177290  | -2.0012160 | 1.3844350  |
| N         | 3.0689830   | 0.9686070  | -0.0094010 | H | 0.7304440  | -2.1710210 | 1.0253640  |
| H         | 0.4030010   | -0.7800150 | -1.5287530 | C | -3.4443620 | -0.1696110 | 0.1002130  |
| N         | 4.5560340   | -0.4331030 | 0.9999770  | N | -2.6994770 | -1.2641420 | -0.0454720 |
| H         | 4.8781270   | -1.3585570 | 1.2247940  | C | -1.3991790 | -1.0712780 | -0.2826140 |
| H         | 5.1792070   | 0.3549580  | 1.0319500  | C | -0.8119360 | 0.1968660  | -0.3537690 |
| N         | 0.7651350   | -1.9874620 | -1.1202110 | C | -1.7127470 | 1.2662210  | -0.1489760 |
| H         | 1.0733600   | -2.9464510 | -1.2599400 | N | -3.0197520 | 1.0910910  | 0.0630010  |
| N         | 1.4542290   | 2.4640540  | -0.6213600 | H | 0.0717130  | -2.1809670 | -1.1061310 |
| H         | 2.1288070   | 3.1942150  | -0.4586800 | N | -4.7868370 | -0.3610810 | 0.2789070  |
| H         | 0.5140240   | 2.6825630  | -0.9293080 | H | -5.0750880 | -1.2839920 | 0.5580830  |
| <b>Pc</b> |             |            |            | H | -5.3076900 | 0.4240830  | 0.6322630  |
| H =       | -926.343990 | a.u.       |            | N | -0.6661720 | -2.2529450 | -0.4166210 |
| G =       | -926.406101 | a.u.       |            | H | -1.2908130 | -3.0361990 | -0.5594760 |
| C         | 2.5950510   | -0.8373010 | -0.5167290 | N | -1.2880590 | 2.5656530  | -0.1923210 |
| O         | 1.3403230   | -0.6202530 | -1.1668240 | H | -1.9984890 | 3.2261560  | 0.0852030  |
| C         | 0.6442200   | 0.5048740  | -0.6256780 | H | -0.3483970 | 2.7725570  | 0.1245180  |
| C         | 1.4603690   | 0.9424680  | 0.6195620  |   |            |            |            |

**INT1<sub>H2O</sub>**

|                                    |                                    |
|------------------------------------|------------------------------------|
| H = -1079.168142 a.u.              | H 1.7194880 -2.5005040 0.9184180   |
| G = -1079.245719 a.u.              | H 3.3961000 -2.9005670 1.0923270   |
| C -2.6712930 0.7796300 -0.5712870  | N 1.3615400 1.8288480 -0.7525270   |
| O -1.3085660 0.4603250 -0.8491110  | H 0.4154180 1.4597020 -0.7784780   |
| C -1.0695870 -0.9339000 -0.6411170 | H -1.1104520 -0.3857170 2.1352570  |
| C -2.4450410 -1.5865460 -0.6115700 | N 6.0076040 0.6656540 -0.3007180   |
| C -3.2845940 -0.4877060 0.0369070  | H 6.6182850 -0.1264360 -0.1806040  |
| H -3.1853820 1.0043630 -1.5127590  | H 6.3248040 1.4073140 -0.9010570   |
| H -0.4583510 -1.2798740 -1.4785850 | O -1.5737000 0.1019100 2.8371150   |
| H -2.4276530 -2.5129800 -0.0314170 | H -1.1333380 -0.1355670 3.6549080  |
| H -3.1423880 -0.4938910 1.1227130  | H 1.5620750 2.6424130 -1.3079110   |
| O -4.6435910 -0.6612170 -0.2980130 | <b>TS1_2<sub>H2O</sub></b>         |
| H -5.1037720 0.1358380 -0.0100820  | H = -1079.069624 a.u.              |
| O -2.8606210 -1.8090160 -1.9385940 | G = -1079.142714 a.u.              |
| H -3.8209420 -1.7153970 -1.9513260 | C -2.0710440 -0.2896000 -0.9098670 |
| O -0.4207270 -1.1378090 0.5769390  | O -0.6097070 -0.4042690 -0.9486510 |
| H 0.4859800 -0.7265780 0.4739690   | C -0.1603890 -1.0623010 0.0197750  |
| C -2.7659110 1.9602220 0.3731420   | C -1.2286560 -1.6931930 0.8796580  |
| H -2.3640620 2.8679520 -0.0898110  | C -2.5031130 -0.9630180 0.4002140  |
| H -2.2110890 1.7321150 1.2877740   | H -2.4233020 -0.8660720 -1.7683670 |
| O -4.1621270 2.1048220 0.6386660   | H 0.9014670 -1.3013200 0.0321100   |
| H -4.2784300 2.5984230 1.4524400   | H -1.0449120 -1.5791210 1.9462120  |
| C 3.0409440 -1.0139950 0.4446330   | H -2.8016110 -0.2210790 1.1368460  |
| N 2.0396230 -0.1914680 0.1028380   | O -3.5105480 -1.9261480 0.1861770  |
| C 2.3818230 0.9986370 -0.4249510   | H -4.3338850 -1.4696720 -0.0132440 |
| C 3.7202140 1.3548050 -0.5998730   | O -1.1937260 -3.0452830 0.4821780  |
| C 4.6697660 0.4117190 -0.2060150   | H -2.0996320 -3.3048140 0.2621290  |
| N 4.3427570 -0.7814710 0.3104950   | O -0.9645390 0.8393230 1.9999910   |
| H 4.0029560 2.3155550 -1.0069480   | H -0.0608190 0.6665400 2.2792070   |
| N 2.6781150 -2.2009160 1.0079010   | C -2.4631410 1.1657180 -1.0353590  |

|                                      |            |            |            |   |            |            |            |
|--------------------------------------|------------|------------|------------|---|------------|------------|------------|
| H                                    | -2.1156560 | 1.5728960  | -1.9889250 | C | -2.0866730 | -0.6625150 | -0.3377050 |
| H                                    | -2.0303010 | 1.7504440  | -0.2215900 | H | -2.4442840 | 0.4253010  | -2.1614540 |
| O                                    | -3.8835590 | 1.1154600  | -0.9656660 | H | 0.8711180  | -0.5663210 | -1.7704040 |
| H                                    | -4.2151430 | 1.9945070  | -0.7694820 | H | -0.5504430 | -2.2102290 | -0.0868710 |
| C                                    | 2.9064480  | -0.5153200 | -1.1305510 | H | -1.9801200 | -0.4020680 | 0.7229560  |
| N                                    | 2.1678460  | 0.4969970  | -1.5447480 | O | -3.2640960 | -1.4043380 | -0.5584750 |
| C                                    | 1.6177900  | 1.3125450  | -0.5864240 | H | -4.0015050 | -0.7886450 | -0.4683310 |
| C                                    | 1.9086400  | 1.0337780  | 0.7905960  | O | -1.1200560 | -2.0331910 | -2.0716580 |
| C                                    | 2.7228150  | -0.0509330 | 1.0780950  | H | -2.0340450 | -2.3428440 | -2.0614800 |
| N                                    | 3.1970780  | -0.8803030 | 0.1373150  | O | -0.6635860 | -1.6877930 | 2.7311100  |
| H                                    | 1.5988440  | 1.7360650  | 1.5545750  | H | -1.5229020 | -2.1148270 | 2.7509130  |
| N                                    | 3.4047050  | -1.3555560 | -2.1010020 | C | -2.6015940 | 1.8001300  | -0.5092720 |
| H                                    | 3.4369850  | -0.9596980 | -3.0270310 | H | -2.5470760 | 2.6863550  | -1.1482470 |
| H                                    | 4.1913330  | -1.9182660 | -1.8185530 | H | -2.0755480 | 1.9928860  | 0.4313790  |
| N                                    | 0.8000440  | 2.2874020  | -0.9142140 | O | -3.9582380 | 1.4146100  | -0.2764600 |
| H                                    | 0.7256150  | 2.3404040  | -1.9263850 | H | -4.3952680 | 2.0839080  | 0.2529550  |
| H                                    | -0.9381490 | 1.7822110  | 1.7145620  | C | 3.3455280  | 0.4754900  | -0.5939980 |
| N                                    | 3.0184880  | -0.4035660 | 2.3869570  | N | 2.6185580  | 1.5414010  | -0.3559840 |
| H                                    | 3.8013820  | -1.0381670 | 2.4560620  | C | 1.4794790  | 1.3312250  | 0.3737730  |
| H                                    | 3.0519770  | 0.3585640  | 3.0472280  | C | 0.9109750  | -0.0652350 | 0.3628400  |
| O                                    | -0.7777760 | 3.2607500  | 0.8695750  | C | 2.0533800  | -1.0313780 | 0.4994080  |
| H                                    | -0.5142980 | 4.1185280  | 1.2060020  | N | 3.2047710  | -0.7927520 | -0.0532970 |
| H                                    | -0.1042830 | 2.9784930  | 0.1228340  | H | 0.2133400  | -0.1829090 | 1.1854580  |
| <b>INT<sub>2</sub>H<sub>2</sub>O</b> |            |            |            | N | 4.4195140  | 0.5962940  | -1.3988390 |
| H = -1079.153466 a.u.                |            |            |            | H | 4.6593180  | 1.5064670  | -1.7530290 |
| G = -1079.226626 a.u.                |            |            |            | H | 5.0576090  | -0.1762270 | -1.4780230 |
| C                                    | -1.9703100 | 0.6037610  | -1.1882770 | N | 0.8461510  | 2.2292390  | 1.0334430  |
| O                                    | -0.5788890 | 0.8189420  | -1.3592350 | H | 1.3073060  | 3.1316680  | 0.9212580  |
| C                                    | 0.1573550  | -0.3348180 | -0.9759470 | H | -0.8301890 | -0.7358180 | 2.8711980  |
| C                                    | -0.8691770 | -1.4549170 | -0.8115020 | N | 1.8216770  | -2.1637060 | 1.1701270  |

H 2.5891180 -2.8051490 1.3003500  
H 0.9846750 -2.2432310 1.7422680  
O -1.0034710 1.1004710 2.7104100  
H -1.1210470 1.6102970 3.5147390  
H -0.3618490 1.6179910 2.1447660

**INT3<sub>H2O</sub>**

H = -1002.741065 a.u.

G = -1002.807443 a.u.

C 2.1702640 -0.1286900 -1.2922660  
O 0.8936260 -0.6175510 -0.8565750  
C 0.2056060 0.4289150 -0.2110550  
C 1.3367660 1.1290860 0.5620870  
C 2.4337740 1.1662210 -0.5017730  
H 2.1155510 0.1001400 -2.3642150  
H -0.2217500 1.1195800 -0.9551570  
H 1.6440410 0.4706650 1.3786920  
H 3.4331310 1.1852410 -0.0635710  
O 2.1846460 2.3452780 -1.2654180  
H 2.9477410 2.5464560 -1.8108390  
O 1.0219970 2.3921040 1.0960860  
H 1.1604570 3.0356730 0.3881400  
O 1.3564470 -2.1076680 1.8125790  
H 1.4525360 -2.7209580 2.5439060  
C 3.2066330 -1.2080760 -1.0249960  
H 4.1297910 -0.9524030 -1.5545060  
H 2.8311890 -2.1548610 -1.4320280  
O 3.5214210 -1.3084270 0.3384860  
H 2.7530030 -1.6676440 0.8228770  
C -3.2846970 -0.2384940 -0.6849530  
N -2.5919990 -1.3442830 -0.7131170

C -1.5150680 -1.4193000 0.1330900  
C -0.9256750 -0.1315750 0.6878340  
C -2.0135490 0.9108410 0.8134260  
N -3.1177570 0.8652820 0.1367780  
H -0.5034570 -0.3521140 1.6708820  
N -4.3296600 -0.1094240 -1.5278710  
H -4.5914770 -0.8967400 -2.0964370  
H -4.9405420 0.6819940 -1.4255460  
N -0.9561960 -2.5194970 0.4672290  
H -1.4193070 -3.2954810 -0.0041010  
H 0.5385860 -2.3834110 1.3134790  
N -1.7943730 1.9310350 1.6574300  
H -2.4681150 2.6825600 1.6370510  
H -0.8408960 2.1560530 1.9186020

**TS3\_4<sub>H2O</sub>**

H = -1002.712972 a.u.

G = -1002.775959 a.u.

C 2.4425010 -0.5255680 -1.0642430  
O 1.0162280 -0.6889860 -1.0103910  
C 0.3835340 0.4361630 -0.4458070  
C 1.4975680 1.1051490 0.3987710  
C 2.7285260 0.8513300 -0.4710990  
H 2.7426150 -0.5600230 -2.1179880  
H 0.0730600 1.1320060 -1.2406690  
H 1.5980040 0.5792780 1.3482530  
H 3.6497260 0.8698080 0.1138800  
O 2.7144950 1.8880070 -1.4536690  
H 3.5498800 1.8982530 -1.9248790  
O 1.3093510 2.4786890 0.6653510  
H 1.5963380 2.9592190 -0.1227160

|                           |            |            |            |   |            |            |            |
|---------------------------|------------|------------|------------|---|------------|------------|------------|
| O                         | 0.6314690  | -1.4965170 | 1.8776130  | C | 2.8277290  | 0.2896340  | -0.6671620 |
| H                         | 0.4556140  | -1.8111870 | 2.7671500  | H | 2.9437600  | -1.8760660 | -0.5958700 |
| C                         | 3.1200480  | -1.6507310 | -0.2859100 | H | 0.6088400  | -0.5166420 | -1.7919360 |
| H                         | 4.1686930  | -1.7004020 | -0.6018950 | H | 1.3821360  | 1.3952140  | 0.4576590  |
| H                         | 2.6390700  | -2.5948640 | -0.5798620 | H | 3.6238320  | 0.8480820  | -0.1717760 |
| O                         | 3.1011280  | -1.4492800 | 1.0950610  | O | 3.0791760  | 0.1581630  | -2.0628800 |
| H                         | 2.1626250  | -1.5348860 | 1.4408650  | H | 4.0081440  | -0.0291790 | -2.2112950 |
| C                         | -3.5304400 | -0.1049720 | -0.3827180 | O | 1.3059140  | 2.0554300  | -1.4599670 |
| N                         | -2.8418750 | -1.2185230 | -0.6346430 | H | 1.7007980  | 1.7862440  | -2.2987180 |
| C                         | -1.5822930 | -1.2303480 | -0.2034840 | O | 0.1668280  | 0.3496440  | 2.5632210  |
| C                         | -0.8765380 | -0.0384190 | 0.3473830  | H | -0.2232560 | 1.1672680  | 2.2264800  |
| C                         | -1.8422070 | 1.0535800  | 0.5994590  | C | 3.1270820  | -1.1341150 | 1.4263790  |
| N                         | -3.1266510 | 0.9909520  | 0.2920870  | H | 4.2074470  | -1.2907650 | 1.3531820  |
| H                         | -0.3285640 | -0.5498860 | 1.3233420  | H | 2.6933950  | -2.0040920 | 1.9346380  |
| N                         | -4.7968000 | -0.0707020 | -0.8283300 | O | 2.9333600  | 0.0514240  | 2.1546340  |
| H                         | -5.1734610 | -0.8759020 | -1.2982530 | H | 1.9973940  | 0.1362340  | 2.4056780  |
| H                         | -5.3682720 | 0.7299880  | -0.6204620 | C | -3.5978340 | -0.0804310 | 0.0492280  |
| N                         | -0.9450540 | -2.3825070 | -0.1728040 | N | -3.0642770 | -1.2272110 | -0.3738970 |
| H                         | -1.4447230 | -3.2077430 | -0.4660570 | C | -1.7502710 | -1.2066840 | -0.5964700 |
| H                         | -0.0878780 | -2.4244090 | 0.3893160  | C | -0.9444320 | -0.0581680 | -0.4166820 |
| N                         | -1.4214650 | 2.1849060  | 1.1630960  | C | -1.6423850 | 1.0775730  | 0.0201920  |
| H                         | -2.1017960 | 2.9250370  | 1.2471870  | N | -2.9549980 | 1.0666270  | 0.2700470  |
| H                         | -0.4335760 | 2.4044240  | 1.2611100  | H | -0.1253770 | -0.3253500 | 1.9380670  |
| <b>INT4<sub>H2O</sub></b> |            |            |            | N | -4.9449310 | -0.0730390 | 0.2530480  |
| H = -1002.762478 a.u.     |            |            |            | H | -5.4079440 | -0.9648040 | 0.2989280  |
| G = -1002.828449 a.u.     |            |            |            | H | -5.3282410 | 0.7008440  | 0.7686980  |
| C                         | 2.5511370  | -1.0578490 | 0.0200880  | N | -1.1969910 | -2.3733950 | -1.0474730 |
| O                         | 1.1192030  | -1.1797000 | 0.0990730  | H | -1.8198510 | -3.1658220 | -1.0065390 |
| C                         | 0.5164230  | -0.1800340 | -0.7469280 | H | -0.2336200 | -2.5469990 | -0.7988340 |
| C                         | 1.4775430  | 0.9986650  | -0.5530080 | N | -1.0179620 | 2.2839960  | 0.3013770  |



H -1.7065940 3.0099270 0.4528260  
H -0.2925380 2.5658320 -0.3493850

**INT1'**<sub>H<sub>2</sub>O</sub>

H = -1079.167743 a.u.

G = -1079.244123 a.u.

C -2.8711520 0.1688860 -0.0673160  
C -0.7464320 -0.8132620 -0.1052590  
C -1.7403420 -1.9198300 0.2089290  
C -2.8892110 -1.0951920 0.8020320  
H -3.5769850 0.0520340 -0.8949620  
H -0.0280180 -1.0735010 -0.8843230  
H -1.3153030 -2.6410720 0.9124910  
H -2.6660310 -0.8495680 1.8450990  
O -4.1504700 -1.7285230 0.6816000  
H -4.3068110 -2.2747380 1.4557680  
O -2.1424960 -2.5308260 -0.9903600  
H -3.0763580 -2.7551940 -0.9057730  
O -0.1329200 -0.4567600 1.0941570  
H 0.6012610 0.1459890 0.9012910  
C -3.2189680 1.4081580 0.7250920  
H -2.4321900 1.5833850 1.4695950  
H -4.1719710 1.2251220 1.2369480  
O -3.3280530 2.5066120 -0.1684050  
H -3.6794590 3.2600370 0.3110750  
C 3.3605580 -1.1081460 -0.2007740  
N 2.6463490 -0.6709170 -1.2405500  
C 2.1381160 0.5649310 -1.1226850  
C 2.2996600 1.3321000 0.0431840  
C 3.1085360 0.7689830 1.0344550  
N 3.6392300 -0.4545840 0.9305960

H 1.8857720 2.3289070 0.1183460  
N 3.8389020 -2.3843790 -0.2923730  
H 3.8523110 -2.7951750 -1.2108610  
H 4.5632600 -2.6411640 0.3570720  
N 1.4492340 1.0442210 -2.1865960  
H 1.2312170 0.3878590 -2.9186740  
H 0.8616620 1.8604710 -2.0667760  
N 3.4209670 1.4602100 2.1731180  
H 3.8005440 0.9131870 2.9292070  
H 2.8642990 2.2613070 2.4190510  
O -0.4404900 2.8180020 -0.8750140  
H -1.2074840 3.3832070 -0.9970580  
H -0.8420260 1.9437640 -0.7313400  
O -1.5512030 0.2519340 -0.6096640

**TS1'**<sub>H<sub>2</sub>O</sub>

H = -1079.030820 a.u.

G = -1079.104845 a.u.

C -3.1433970 -0.1193910 -0.2800810  
C -0.9644030 -0.4411590 -0.8128640  
C -1.2749540 -1.6354450 0.0466080  
C -2.6548960 -1.2509350 0.6333960  
H -3.8795640 -0.4873990 -0.9970380  
H -0.0503620 -0.2813500 -1.3731100  
H -0.5142930 -1.8085330 0.8054090  
H -2.5234990 -0.8946320 1.6540880  
O -3.5738250 -2.3246700 0.5475890  
H -3.6130630 -2.7815940 1.3916740  
O -1.3636500 -2.7114490 -0.8622740  
H -2.2228110 -3.1363460 -0.7304090  
O -0.6767000 0.5430890 1.3471510

|                       |            |            |            |   |            |            |            |
|-----------------------|------------|------------|------------|---|------------|------------|------------|
| H                     | -0.6539600 | 1.5079700  | 1.3424780  | C | -3.0423980 | 0.7887090  | -0.8010900 |
| C                     | -3.6639630 | 1.0921540  | 0.4506720  | O | -2.7721800 | 0.0108990  | -1.9574670 |
| H                     | -2.8963630 | 1.4644840  | 1.1340000  | C | -0.7146770 | -1.1316570 | -0.4504580 |
| H                     | -4.5405840 | 0.7677680  | 1.0226780  | C | -1.2535050 | -0.3006510 | 0.7072270  |
| O                     | -4.0085170 | 2.0696680  | -0.5207350 | C | -2.7496000 | -0.0087080 | 0.4715840  |
| H                     | -4.5622200 | 2.7393680  | -0.1116640 | H | -4.1051140 | 1.0627620  | -0.7723610 |
| C                     | 4.3460720  | 0.0926720  | -0.0401710 | H | -0.7066120 | 0.6408010  | 0.7908170  |
| N                     | 3.7071560  | 1.2592520  | -0.0134760 | H | -3.0929180 | 0.5587480  | 1.3382040  |
| C                     | 2.3690630  | 1.1703500  | 0.0812550  | O | -3.4883850 | -1.2180840 | 0.4711030  |
| C                     | 1.6292270  | -0.0211450 | 0.1646160  | H | -3.0538790 | -1.8535530 | -0.1118190 |
| C                     | 2.4570230  | -1.1447360 | 0.0625860  | O | -1.0931170 | -0.9808670 | 1.9307560  |
| N                     | 3.7996200  | -1.1196470 | -0.0233320 | H | -1.5791260 | -1.8123070 | 1.8741300  |
| H                     | 0.3013100  | 0.2579710  | 0.9483290  | C | -2.1889770 | 2.0463340  | -0.9282700 |
| N                     | 5.7218810  | 0.1463540  | -0.1520570 | H | -2.5435690 | 2.6434070  | -1.7735300 |
| H                     | 6.1325330  | 1.0165220  | 0.1469930  | H | -1.1559500 | 1.7629020  | -1.1458260 |
| H                     | 6.1981090  | -0.6933560 | 0.1365990  | O | -2.1669200 | 2.7869890  | 0.2768120  |
| N                     | 1.7223140  | 2.3943720  | 0.1495560  | H | -2.9758720 | 3.2981400  | 0.3529630  |
| H                     | 2.2947700  | 3.1725560  | -0.1422000 | O | -0.8564320 | -2.3334550 | -0.4592040 |
| H                     | 0.7632030  | 2.4197630  | -0.1671850 | H | -3.5118370 | -0.5801040 | -2.1203410 |
| N                     | 1.9324010  | -2.4426680 | 0.0839360  | H | -0.2531670 | -0.6009180 | -1.2983160 |
| H                     | 2.6250260  | -3.1256210 | -0.1925010 | C | 3.1671580  | 0.9443760  | -0.4727740 |
| H                     | 1.0582050  | -2.5733810 | -0.4044250 | N | 2.6510520  | 1.2344860  | 0.7243820  |
| O                     | -1.3111150 | 3.0834540  | -0.1462790 | C | 1.9938520  | 0.2377920  | 1.3298380  |
| H                     | -1.2440500 | 4.0403900  | -0.1869040 | C | 1.8551690  | -1.0285210 | 0.7524260  |
| H                     | -2.1078880 | 2.8491490  | -0.6415020 | C | 2.4051990  | -1.1860060 | -0.5210270 |
| O                     | -1.9845360 | 0.2684620  | -1.0884270 | N | 3.0686330  | -0.2051010 | -1.1455900 |
| <b>INT6</b>           |            |            |            | H | 1.3524300  | -1.8338580 | 1.2685310  |
| H = -1002.741910 a.u. |            |            |            | N | 3.8301790  | 1.9601180  | -1.1063620 |
| G = -1002.813146 a.u. |            |            |            | H | 4.1251020  | 2.7280020  | -0.5261900 |
|                       |            |            |            | H | 4.4258280  | 1.6922770  | -1.8722980 |

N 1.4594230 0.5074170 2.5569960  
H 1.4349940 1.4825210 2.8121480  
H 0.6844630 -0.0669400 2.8595470  
N 2.2909300 -2.3720310 -1.1955390  
H 1.5082570 -2.9646130 -0.9589140  
H 2.5283890 -2.3253510 -2.1746770

**TS6\_8**

H = -1002.722676 a.u.

G = -1002.788767 a.u.

C -3.0361910 0.1644440 -0.9502480  
O -2.3592840 -0.5010910 -1.9962560  
C -0.2365090 -0.7398300 -0.1465030  
C -1.1372800 0.0123250 0.8452270  
C -2.6135640 -0.2335370 0.4666420  
H -4.1108780 -0.0683160 -1.0041300  
H -0.9160280 1.0817740 0.8232480  
H -3.2162380 0.3705820 1.1498360  
O -2.9323760 -1.5875190 0.7457160  
H -2.2278650 -2.1272840 0.3432280  
O -0.9602010 -0.4261990 2.1839130  
H -1.5377260 -1.1902480 2.3108350  
C -2.8380650 1.6544480 -1.2169660  
H -3.1799730 1.8726620 -2.2337980  
H -1.7743430 1.8987140 -1.1728260  
O -3.4844800 2.4693360 -0.2560700  
H -4.4329570 2.4273400 -0.4007650  
O -0.4936190 -1.9754500 -0.3357990  
H -2.0261760 -1.3566540 -1.6977190  
H 0.0249870 -0.1229360 -1.0234350  
C 3.2674420 0.8818540 -0.5893320

N 2.6733090 1.4508790 0.4751990  
C 1.8695730 0.6622200 1.1772490  
C 1.5145560 -0.6679850 0.7465710  
C 2.3384970 -1.1614740 -0.3260460  
N 3.1702180 -0.3865470 -1.0139440  
H 1.2099480 -1.3647070 1.5162070  
N 4.0685500 1.6862580 -1.3099310  
H 4.2014100 2.6384650 -1.0165130  
H 4.5591140 1.3086940 -2.1020220  
N 1.3609680 1.1477550 2.3181640  
H 1.5606700 2.1079710 2.5494480  
H 0.6075720 0.6530060 2.7800170  
N 2.2113680 -2.4474560 -0.6892720  
H 1.3061990 -2.8655740 -0.4780810  
H 2.6303110 -2.6871130 -1.5766310

**INT8**

H = -1002.738442 a.u.

G = -1002.803078 a.u.

C 2.7451290 -0.8976500 -0.1589550  
O 2.0542590 -2.0857830 0.1183130  
C 0.1193240 0.5429820 -0.7786720  
C 0.6791650 0.3855740 0.6484250  
C 2.2030490 0.3011530 0.6422970  
H 2.7015720 -0.6363890 -1.2263700  
H 0.2928560 -0.5356560 1.0840470  
H 2.5302020 0.2183320 1.6872850  
O 2.6708970 1.5341220 0.0892150  
H 3.6354720 1.4830670 0.0490370  
O 0.2463590 1.4349880 1.4883800  
H 0.7048920 2.2350430 1.2087510

|              |              |            |            |   |            |            |            |
|--------------|--------------|------------|------------|---|------------|------------|------------|
| C            | 4.1949450    | -1.1795070 | 0.2072760  | C | -1.0315980 | 0.9774680  | -0.6268010 |
| H            | 4.5883480    | -1.9565820 | -0.4532740 | C | -2.4554690 | 0.5286170  | -0.3380440 |
| H            | 4.2221910    | -1.5404290 | 1.2411560  | H | -2.3845190 | -1.2412440 | 0.8794340  |
| O            | 4.9367580    | 0.0331890  | 0.0720730  | H | -0.6933130 | 0.5208680  | -1.5573440 |
| H            | 5.8430700    | -0.1086390 | 0.3512290  | H | -3.0985410 | 0.8747090  | -1.1569030 |
| O            | 0.3206740    | 1.8651360  | -1.2700020 | O | -2.8199360 | 1.1923010  | 0.8735190  |
| H            | 1.1660550    | -2.0770260 | -0.2980660 | H | -3.7308970 | 0.9345690  | 1.0673600  |
| H            | 0.6277590    | -0.1645160 | -1.4366580 | O | -0.9673150 | 2.3797430  | -0.7944670 |
| C            | -3.6561140   | -0.7083510 | 0.3121730  | H | -1.4762810 | 2.7761560  | -0.0763480 |
| N            | -3.4477900   | 0.6503360  | 0.3687840  | C | -3.9912100 | -1.4458420 | -0.5002160 |
| C            | -2.3573480   | 1.0935640  | -0.1848840 | H | -4.1174140 | -2.5020080 | -0.2486620 |
| C            | -1.3692210   | 0.1894270  | -0.8950210 | H | -4.1688340 | -1.3079830 | -1.5725790 |
| C            | -1.6141060   | -1.2781710 | -0.5507650 | O | -4.8638030 | -0.6191680 | 0.2723230  |
| N            | -2.8463870   | -1.6545950 | -0.0978210 | H | -5.7769510 | -0.8392910 | 0.0787820  |
| H            | -1.6253350   | 0.2966720  | -1.9589090 | O | -0.0153450 | 1.5005390  | 1.6130380  |
| N            | -4.8723520   | -1.0760400 | 0.7625510  | H | -0.8714560 | -1.9467220 | -0.5195010 |
| H            | -5.4689590   | -0.3793500 | 1.1734310  | H | -0.5629550 | -0.4074540 | 0.9609040  |
| H            | -5.0826670   | -2.0559040 | 0.8452900  | C | 3.8105160  | -0.6724660 | -0.0477460 |
| N            | -2.1519100   | 2.4094270  | -0.2467210 | N | 3.5399830  | 0.6030980  | -0.4462780 |
| H            | -2.8037560   | 3.0055990  | 0.2384450  | C | 2.2888260  | 0.9917550  | -0.2891030 |
| H            | -1.2602940   | 2.7563360  | -0.5746120 | C | 1.3186870  | 0.1525590  | 0.3614580  |
| N            | -0.6577980   | -2.1143840 | -0.7413970 | C | 1.6496680  | -1.2810620 | 0.3772030  |
| H            | 1.2645520    | 2.0561760  | -1.1698520 | N | 2.9718660  | -1.6228230 | 0.3078280  |
| H            | -1.0028050   | -3.0472910 | -0.5137770 | H | 1.0189660  | 1.0054420  | 1.6827170  |
| <b>TS8_9</b> |              |            |            | N | 5.1365370  | -0.9821340 | -0.0482930 |
| H =          | -1002.661286 | a.u.       |            | H | 5.7536500  | -0.3553370 | -0.5362050 |
| G =          | -1002.726185 | a.u.       |            | H | 5.3771880  | -1.9571220 | 0.0152450  |
| C            | -2.5724350   | -1.0083090 | -0.1780340 | N | 1.9718500  | 2.2459010  | -0.6837880 |
| O            | -1.6958940   | -1.7072790 | -1.0162010 | H | 2.7003090  | 2.7635550  | -1.1489660 |
| C            | -0.1245990   | 0.4687620  | 0.4939100  | H | 1.0102550  | 2.5487000  | -0.7735540 |

N 0.6881960 -2.1562040 0.4454060  
H -0.6928410 1.3668080 2.2972980  
H 1.0986420 -3.0864990 0.4827310

**INT9**

H = -1002.7226 a.u.

G = -1002.791279 a.u.

C 2.7125420 -1.0547210 -0.6409910  
O 2.1510710 -2.3306550 -0.3837810  
C 0.0158560 0.2142780 -0.0882480  
C 1.0023890 -0.1263820 1.0013560  
C 2.4397000 -0.0498240 0.4946570  
H 2.3161360 -0.6278500 -1.5704930  
H 0.8331900 -1.1385050 1.3789520  
H 3.0950830 -0.2704230 1.3474670  
O 2.6641320 1.2730660 0.0347530  
H 3.5721380 1.3123260 -0.2910440  
O 0.8129560 0.7437640 2.1087750  
H 0.6877840 1.6441620 1.7497480  
C 4.2034590 -1.3118700 -0.8034560  
H 4.3723030 -1.9216460 -1.6954070  
H 4.5485010 -1.8653750 0.0773270  
O 4.8612600 -0.0537460 -0.9063060  
H 5.8106100 -0.1843940 -0.9464390  
O 0.3957180 3.0013240 0.4241370  
H 1.2325450 -2.3377040 -0.6664010  
H 0.4177600 0.6648160 -0.9922300  
C -3.8200070 -0.6119200 -0.5156840  
N -3.3411580 -0.9015020 0.7493920  
C -2.1395540 -0.4815380 1.0272940  
C -1.3192930 0.1671750 -0.0152210

C -2.1316680 0.8014460 -1.0926480  
N -3.3410810 0.2256320 -1.3988360  
H -0.2725860 2.8374350 -0.2637210  
N -4.9626680 -1.2726130 -0.8105490  
H -5.4320100 -1.7674970 -0.0717230  
H -5.4636740 -1.0056590 -1.6411500  
N -1.6306760 -0.6794830 2.2533760  
H -2.2567060 -1.0761740 2.9380690  
H -0.8270620 -0.1356400 2.5588830  
N -1.6458540 1.8512900 -1.6467310  
H 1.2412850 2.7863560 0.0110690  
H -2.2868720 2.1726170 -2.3724400

**INT10**

H = -926.303913 a.u.

G = -926.367202 a.u.

C 2.3641630 0.8141460 -0.1579150  
O 1.3404860 1.5587270 -0.7791020  
C -0.0435800 -0.1995310 0.9547840  
C 1.0575830 -1.1896050 0.8336400  
C 2.0507530 -0.7002060 -0.2608830  
H 2.5031200 1.0880010 0.8953830  
H 0.7067650 -2.1913250 0.5581950  
H 1.5992900 -0.8415160 -1.2537840  
O 3.1738040 -1.5477460 -0.1185950  
H 3.9886330 -1.0290810 -0.1864250  
O 1.7200560 -1.2363600 2.0756590  
H 2.5655330 -1.6711590 1.9064510  
C 3.6235450 1.2037930 -0.9275500  
H 3.6970290 2.2931620 -0.9089390  
H 3.5250840 0.8732960 -1.9686840

|                       |            |            |            |                      |            |            |            |
|-----------------------|------------|------------|------------|----------------------|------------|------------|------------|
| O                     | 4.7615500  | 0.6044840  | -0.3077710 | H                    | -4.0472480 | 0.9485410  | -0.3499550 |
| H                     | 5.5616730  | 0.8905540  | -0.7536850 | O                    | -1.7410830 | 1.4371330  | 1.9993120  |
| H                     | 0.6532200  | 1.8808530  | -0.1665890 | H                    | -2.6411740 | 1.7296790  | 1.8001470  |
| H                     | 0.2077590  | 0.6190060  | 1.6265680  | C                    | -3.4235170 | -1.3922550 | -0.9324570 |
| C                     | -3.8321710 | 0.1294970  | -0.1323770 | H                    | -3.4908490 | -2.4668710 | -0.7470260 |
| N                     | -3.2987240 | 1.2158180  | 0.3574430  | H                    | -3.1220600 | -1.2286540 | -1.9736520 |
| C                     | -1.9275270 | 1.2338240  | 0.4378580  | O                    | -4.6778040 | -0.7507220 | -0.6594750 |
| C                     | -1.2025270 | -0.0615130 | 0.3003860  | H                    | -5.3585170 | -1.1110100 | -1.2311490 |
| C                     | -1.9110860 | -1.0399400 | -0.5354630 | H                    | -0.0489320 | -1.9940220 | 0.3781280  |
| N                     | -3.1951320 | -0.9600230 | -0.7085840 | H                    | -0.2529790 | -0.4365460 | 1.6746900  |
| N                     | -5.1777750 | 0.0214190  | -0.1549910 | C                    | 3.7876060  | -0.2042110 | -0.1843020 |
| H                     | -5.7291480 | 0.8107840  | 0.1357020  | N                    | 3.1642420  | -1.2804720 | 0.2812720  |
| H                     | -5.5959890 | -0.7431520 | -0.6553750 | C                    | 1.8403420  | -1.1458460 | 0.4404630  |
| N                     | -1.2085660 | 2.2830420  | 0.6064760  | C                    | 1.1898810  | 0.1588450  | 0.3039130  |
| H                     | -1.8117130 | 3.0978940  | 0.7122680  | C                    | 1.9431080  | 1.0944830  | -0.5054860 |
| N                     | -1.2443330 | -2.0752940 | -1.0968140 | N                    | 3.2336890  | 0.9327040  | -0.6920310 |
| H                     | -1.7829510 | -2.6566430 | -1.7222540 | N                    | 5.1299260  | -0.2436380 | -0.2334620 |
| H                     | -0.2586780 | -1.9910460 | -1.2799530 | H                    | 5.6043890  | -1.0847910 | 0.0473940  |
| <b>TS10_11</b>        |            |            |            | H                    | 5.6281300  | 0.5171820  | -0.6620380 |
| H = -926.2903943 a.u. |            |            |            | N                    | 1.0394530  | -2.1598220 | 0.6716600  |
| G = -926.3516393 a.u. |            |            |            | H                    | 1.4823650  | -3.0681180 | 0.7100570  |
| C                     | -2.3386360 | -0.8277860 | -0.0132300 | N                    | 1.3671620  | 2.1894690  | -1.0409400 |
| O                     | -1.1742120 | -1.5026250 | -0.2773270 | H                    | 1.9573060  | 2.7610390  | -1.6269690 |
| C                     | -0.0207160 | 0.2932270  | 0.9059290  | H                    | 0.3763070  | 2.2087850  | -1.2117180 |
| C                     | -1.1151170 | 1.2786180  | 0.7498230  | <b>Pc</b>            |            |            |            |
| C                     | -2.1223730 | 0.6818250  | -0.2792210 | H = -926.343990 a.u. |            |            |            |
| H                     | -2.6999640 | -0.9324220 | 1.0276900  | G = -926.406101 a.u. |            |            |            |
| H                     | -0.7723380 | 2.2556320  | 0.3883490  | C                    | 2.4597300  | -0.3531090 | -0.5718740 |
| H                     | -1.6830840 | 0.7664280  | -1.2847360 | O                    | 1.1457050  | -0.6927790 | -0.9656160 |
| O                     | -3.2714160 | 1.4969720  | -0.1571710 | C                    | 0.2985540  | 0.4281250  | -0.6683570 |

|   |            |            |            |                           |            |            |            |
|---|------------|------------|------------|---------------------------|------------|------------|------------|
| C | 1.0243540  | 1.2370570  | 0.4432640  | <b>INT6<sub>H2O</sub></b> |            |            |            |
| C | 2.2518340  | 0.3751180  | 0.7556670  | H = -1079.158476 a.u.     |            |            |            |
| H | 2.9237850  | 0.3371640  | -1.2906830 | G = -1079.235999 a.u.     |            |            |            |
| H | 0.3855570  | 1.3799790  | 1.3193770  | C                         | 2.5120540  | -1.1450350 | -0.8782580 |
| H | 1.9908350  | -0.3642450 | 1.5250170  | O                         | 2.4403760  | -0.3436780 | -2.0585630 |
| O | 3.3199380  | 1.1917760  | 1.1643220  | C                         | 0.8381330  | 1.4291420  | -0.3769430 |
| H | 4.1258150  | 0.6642890  | 1.1077450  | C                         | 1.4226810  | 0.5602320  | 0.7155210  |
| O | 1.4000500  | 2.4886240  | -0.0973690 | C                         | 2.7067990  | -0.1725660 | 0.2860250  |
| H | 2.2035590  | 2.7733780  | 0.3560380  | H                         | 3.4028930  | -1.7819480 | -0.9169630 |
| C | 3.2832060  | -1.6153420 | -0.4434680 | H                         | 0.6950660  | -0.2114530 | 0.9580660  |
| H | 3.4486770  | -2.0730270 | -1.4233790 | H                         | 3.0135680  | -0.7449810 | 1.1626390  |
| H | 2.7471720  | -2.3227680 | 0.2011030  | O                         | 3.7393370  | 0.7470790  | 0.0082660  |
| O | 4.5106120  | -1.2099530 | 0.1537710  | H                         | 3.6593850  | 1.0002000  | -0.9193670 |
| H | 5.0913760  | -1.9666410 | 0.2540700  | O                         | 1.6322100  | 1.3029430  | 1.8865830  |
| H | -0.7937720 | 2.6719600  | -0.5350290 | H                         | 2.1566760  | 2.0778210  | 1.6507040  |
| H | 0.2829340  | 1.0767460  | -1.5538030 | C                         | 1.2496190  | -2.0008320 | -0.7600910 |
| C | -3.6857060 | -0.4295310 | 0.2626890  | H                         | 1.2614500  | -2.7721290 | -1.5410310 |
| N | -3.3638050 | 0.8313210  | -0.0260120 | H                         | 0.3796150  | -1.3633580 | -0.9587030 |
| C | -2.0759190 | 1.0465820  | -0.3095070 | O                         | 1.1817260  | -2.5901490 | 0.5182980  |
| C | -1.1077540 | 0.0279020  | -0.3275830 | H                         | 0.2645650  | -2.5288780 | 0.8311280  |
| C | -1.5779430 | -1.2453800 | 0.0265090  | O                         | 0.8805630  | 2.6360170  | -0.3143920 |
| N | -2.8668200 | -1.4780150 | 0.3084570  | H                         | 2.5719230  | -0.8906040 | -2.8364260 |
| N | -4.9962900 | -0.6641620 | 0.5839600  | H                         | 0.3777460  | 0.9197170  | -1.2388870 |
| H | -5.6559490 | 0.0432640  | 0.3060710  | C                         | -2.0856660 | -1.7927860 | -0.2145740 |
| H | -5.2962560 | -1.6244080 | 0.5570450  | N                         | -2.5462860 | -0.8448770 | -1.0226260 |
| N | -1.7445070 | 2.3399130  | -0.6143390 | C                         | -2.4925110 | 0.4127270  | -0.5445780 |
| H | -2.4727770 | 3.0134780  | -0.4363500 | C                         | -2.0054380 | 0.7030470  | 0.7390330  |
| N | -0.7544080 | -2.3352710 | 0.1418730  | C                         | -1.5573260 | -0.3799470 | 1.4881180  |
| H | -1.2476340 | -3.2139740 | 0.1766750  | N                         | -1.5633530 | -1.6409220 | 1.0104710  |
| H | 0.1149240  | -2.3015800 | -0.3663560 | H                         | -1.9884720 | 1.7160280  | 1.1182030  |

|                       |            |            |            |                            |            |            |            |
|-----------------------|------------|------------|------------|----------------------------|------------|------------|------------|
| N                     | -2.0607730 | -3.0693910 | -0.7162620 | O                          | 2.3714230  | 1.9169420  | -0.1637620 |
| H                     | -2.6369330 | -3.2259840 | -1.5278980 | H                          | 2.5182040  | 2.7747740  | 0.2438470  |
| H                     | -2.0216600 | -3.8114920 | -0.0355440 | O                          | -0.2022000 | 0.7258070  | -1.1991890 |
| N                     | -2.9387090 | 1.3898850  | -1.3630610 | H                          | 4.8281410  | -1.2412550 | -0.2773500 |
| H                     | -3.1669910 | 1.1229260  | -2.3064560 | H                          | 0.1337250  | -1.1597830 | -1.7978940 |
| H                     | -2.7208790 | 2.3588050  | -1.1580410 | C                          | -2.8967630 | -1.1975330 | -0.7728130 |
| N                     | -1.0511160 | -0.2191720 | 2.7484550  | N                          | -3.2660660 | 0.0615480  | -0.9831800 |
| H                     | -0.5693870 | -1.0237980 | 3.1215400  | C                          | -2.9414490 | 0.9326770  | -0.0177400 |
| H                     | -0.6225200 | 0.6701040  | 2.9638110  | C                          | -2.3173050 | 0.5397540  | 1.1677280  |
| O                     | -1.6333540 | 3.8806850  | -0.6338980 | C                          | -2.0122910 | -0.8124710 | 1.2788400  |
| H                     | -0.6914630 | 3.6528650  | -0.6314440 | N                          | -2.2635840 | -1.6920510 | 0.2967410  |
| H                     | -1.6998630 | 4.7804210  | -0.3100350 | H                          | -2.0865810 | 1.2472650  | 1.9520170  |
| <b>INT6'</b>          |            |            |            | N                          | -3.1365170 | -2.0869660 | -1.7944590 |
| H = -1079.157986 a.u. |            |            |            | H                          | -3.8229330 | -1.7856720 | -2.4680030 |
| G = -1079.233564 a.u. |            |            |            | H                          | -3.1673020 | -3.0564560 | -1.5215090 |
| C                     | 3.3254810  | -0.1782960 | -0.8524800 | N                          | -3.2789680 | 2.2408760  | -0.2351470 |
| O                     | 4.5793160  | -0.7854410 | -1.0909490 | H                          | -3.5125880 | 2.4501330  | -1.1943040 |
| C                     | 0.2453800  | -0.3765070 | -1.0252410 | H                          | -2.6963100 | 2.9242250  | 0.2292570  |
| C                     | 0.9979050  | -0.8029080 | 0.2178290  | N                          | -1.4442730 | -1.3248260 | 2.4214010  |
| C                     | 2.4447920  | -1.2063600 | -0.1213420 | H                          | -1.1225030 | -2.2771170 | 2.3305830  |
| H                     | 2.8857230  | 0.0462750  | -1.8302780 | H                          | -0.8078130 | -0.7071260 | 2.9031490  |
| H                     | 0.5028130  | -1.7147210 | 0.5714060  | O                          | -0.3596610 | 3.0681350  | 0.4270820  |
| H                     | 2.4145460  | -2.0878950 | -0.7697340 | H                          | -0.3693440 | 2.2122740  | -0.0328390 |
| O                     | 3.0940270  | -1.6098040 | 1.0711800  | H                          | -0.0909610 | 3.6885790  | -0.2548510 |
| H                     | 2.7677920  | -1.0367840 | 1.7769940  | <b>TS6_7<sub>H2O</sub></b> |            |            |            |
| O                     | 0.9494790  | 0.1205470  | 1.2719610  | H = -1079.143235 a.u.      |            |            |            |
| H                     | 1.1716950  | 0.9960300  | 0.9098890  | G = -1079.214778 a.u.      |            |            |            |
| C                     | 3.5650160  | 1.1423620  | -0.1249430 | C                          | 2.9982240  | -0.5538620 | -0.8936110 |
| H                     | 4.3775920  | 1.6532990  | -0.6466990 | O                          | 2.3644650  | -0.2072730 | -2.1084040 |
| H                     | 3.8782950  | 0.9500910  | 0.9092170  | C                          | 0.1845530  | 0.6337300  | -0.3353620 |



|   |            |            |            |                           |            |            |            |
|---|------------|------------|------------|---------------------------|------------|------------|------------|
| C | 1.1729010  | 0.2490580  | 0.7719490  | N                         | -1.1074890 | -0.7291540 | 2.5970820  |
| C | 2.6186640  | 0.3816340  | 0.2613950  | H                         | -0.9989960 | -1.6331350 | 3.0302930  |
| H | 4.0883170  | -0.4817440 | -1.0015330 | H                         | -0.5347360 | 0.0420050  | 2.9164510  |
| H | 1.0170320  | -0.7786470 | 1.1031020  | O                         | -1.2421250 | 3.7203590  | 0.1944690  |
| H | 3.2661760  | 0.1382460  | 1.1074400  | H                         | -0.5091300 | 3.1667760  | -0.1589220 |
| O | 2.8888290  | 1.7261700  | -0.0993230 | H                         | -0.9822090 | 4.6371360  | 0.0931590  |
| H | 2.0833110  | 2.0626810  | -0.5349450 | <b>INT7<sub>H2O</sub></b> |            |            |            |
| O | 1.0100030  | 1.0752760  | 1.9147690  | H = -1079.152824 a.u.     |            |            |            |
| H | 1.3604180  | 1.9467950  | 1.6949840  | G = -1079.222828 a.u.     |            |            |            |
| C | 2.6214130  | -2.0034090 | -0.6371310 | C                         | 2.9520290  | -0.5199810 | -0.9497300 |
| H | 3.0619050  | -2.6261510 | -1.4221620 | O                         | 2.3267200  | 0.0021100  | -2.0999250 |
| H | 1.5299790  | -2.1055750 | -0.6936840 | C                         | 0.1268480  | 0.3779480  | -0.1851070 |
| O | 3.1095110  | -2.3561860 | 0.6470650  | C                         | 1.1649120  | -0.0184940 | 0.8880490  |
| H | 2.9863330  | -3.2973870 | 0.7828430  | C                         | 2.6051820  | 0.1752500  | 0.3745950  |
| O | 0.2950530  | 1.8206730  | -0.8005180 | H                         | 4.0356500  | -0.3958760 | -1.0652030 |
| H | 2.5214360  | 0.7280490  | -2.2738870 | H                         | 1.0331920  | -1.0650360 | 1.1804460  |
| H | 0.0033700  | -0.1816920 | -1.0535260 | H                         | 3.2672680  | -0.2522270 | 1.1308570  |
| C | -2.5825590 | -1.7288930 | -0.4062410 | O                         | 2.8990650  | 1.5617980  | 0.3342910  |
| N | -2.8764310 | -0.6136360 | -1.0809390 | H                         | 2.2443540  | 1.9380870  | -0.2776640 |
| C | -2.4272640 | 0.5226000  | -0.5419750 | O                         | 1.0122310  | 0.7617260  | 2.0709490  |
| C | -1.5380510 | 0.5304430  | 0.5936880  | H                         | 1.5457790  | 1.5589760  | 1.9451540  |
| C | -1.5704170 | -0.7034790 | 1.3362730  | C                         | 2.6507370  | -2.0150720 | -0.8945760 |
| N | -1.9982480 | -1.8402070 | 0.8056860  | H                         | 3.0403150  | -2.4715820 | -1.8097960 |
| H | -1.4539330 | 1.4514700  | 1.1593740  | H                         | 1.5642960  | -2.1698480 | -0.8744860 |
| N | -2.9351680 | -2.8909210 | -0.9891180 | O                         | 3.2647310  | -2.5605730 | 0.2653100  |
| H | -3.4609760 | -2.8626650 | -1.8458430 | H                         | 3.2681410  | -3.5169670 | 0.2001720  |
| H | -2.8436980 | -3.7445700 | -0.4662160 | O                         | 0.4673600  | 1.5048640  | -0.8574450 |
| N | -2.7603230 | 1.6684370  | -1.1243560 | H                         | 1.6532930  | 0.6698360  | -1.8549140 |
| H | -3.2653090 | 1.6235670  | -1.9952450 | H                         | 0.0089980  | -0.4880560 | -0.8650820 |
| H | -2.3963430 | 2.5541130  | -0.7785450 | C                         | -2.9238640 | -1.4193890 | -0.4181080 |

|                            |            |            |            |   |            |            |            |
|----------------------------|------------|------------|------------|---|------------|------------|------------|
| N                          | -3.0036440 | -0.2645000 | -1.0886060 | H | 2.2920980  | 2.0266790  | -0.2308960 |
| C                          | -2.3175280 | 0.7515220  | -0.5771470 | O | 1.0298180  | 0.7681850  | 2.0905520  |
| C                          | -1.3231150 | 0.5603730  | 0.5179990  | H | 1.5446790  | 1.5795920  | 1.9814630  |
| C                          | -1.6931290 | -0.6460440 | 1.3136140  | C | 2.6714770  | -1.9466590 | -0.9259010 |
| N                          | -2.3927540 | -1.6390070 | 0.8105530  | H | 3.0550210  | -2.3866830 | -1.8516220 |
| H                          | -1.2319980 | 1.4483400  | 1.1448910  | H | 1.5864230  | -2.1108320 | -0.8978690 |
| N                          | -3.4898650 | -2.4840790 | -0.9941840 | O | 3.3014190  | -2.5007440 | 0.2195830  |
| H                          | -3.9256890 | -2.3815990 | -1.8955850 | H | 3.3137580  | -3.4562920 | 0.1428220  |
| H                          | -3.4896010 | -3.3654280 | -0.5091280 | O | 0.4566860  | 1.5967270  | -0.7965930 |
| N                          | -2.4755730 | 1.9512650  | -1.0862060 | H | 1.6983390  | 0.7827180  | -1.8685950 |
| H                          | -3.0676280 | 2.0396060  | -1.8992620 | H | 0.0456140  | -0.3944890 | -0.8857570 |
| H                          | -1.9116800 | 2.7441470  | -0.7541350 | C | -2.8621660 | -1.4686720 | -0.4462690 |
| N                          | -1.2590200 | -0.7287060 | 2.5662750  | N | -2.9895600 | -0.3119380 | -1.0837400 |
| H                          | -1.4226430 | -1.5894100 | 3.0668560  | C | -2.3535430 | 0.7385700  | -0.5427490 |
| H                          | -0.5538760 | -0.0716910 | 2.8895880  | C | -1.3109500 | 0.5390390  | 0.5317650  |
| O                          | -0.5950570 | 3.5803610  | 0.1197150  | C | -1.6457850 | -0.7060020 | 1.3052080  |
| H                          | -0.0237360 | 2.8329190  | -0.2650880 | N | -2.3200480 | -1.6995520 | 0.7868330  |
| H                          | -0.1412670 | 4.4120380  | -0.0231430 | H | -1.2740850 | 1.4056630  | 1.1943000  |
| <b>TS7_8<sub>H2O</sub></b> |            |            |            | N | -3.3785910 | -2.5531030 | -1.0371710 |
| H = -1079.148363 a.u.      |            |            |            | H | -3.8351090 | -2.4548160 | -1.9286120 |
| G = -1079.216421 a.u.      |            |            |            | H | -3.3586060 | -3.4344830 | -0.5531760 |
| C                          | 2.9602920  | -0.4489490 | -0.9621070 | N | -2.5776520 | 1.9481980  | -0.9574810 |
| O                          | 2.3159690  | 0.0717910  | -2.1058540 | H | -3.2286960 | 2.0262500  | -1.7292270 |
| C                          | 0.1117420  | 0.4173710  | -0.1452290 | H | -1.9039580 | 2.7966110  | -0.5604770 |
| C                          | 1.1797180  | 0.0188910  | 0.8896970  | N | -1.2116580 | -0.7922250 | 2.5595950  |
| C                          | 2.6161630  | 0.2252270  | 0.3718980  | H | -1.3622800 | -1.6591890 | 3.0533010  |
| H                          | 4.0412190  | -0.3113160 | -1.0849550 | H | -0.5304110 | -0.1197830 | 2.8989530  |
| H                          | 1.0608130  | -1.0352500 | 1.1589370  | O | -0.8543260 | 3.4270480  | 0.0216240  |
| H                          | 3.2771900  | -0.2227320 | 1.1169400  | H | -0.0810870 | 2.5316520  | -0.4056410 |
| O                          | 2.9285400  | 1.6080710  | 0.3669780  | H | -0.6248970 | 4.3155240  | -0.2543400 |

**TS6'\_8<sub>H2O</sub>**

H = -1079.144766 a.u.

G = -1079.212374 a.u.

C 3.0897160 -0.1268000 -0.9873990  
O 4.0995830 -0.7309630 -1.7838740  
C -0.1326930 0.0430330 -0.5146940  
C 0.8319170 -0.9239800 0.1949520  
C 2.0938990 -1.2390170 -0.6118790  
H 2.5808950 0.6190620 -1.5949490  
H 0.3369650 -1.8939330 0.3112530  
H 1.7727460 -1.6740040 -1.5639900  
O 2.8092510 -2.2722810 0.0677730  
H 2.7749390 -2.0586600 1.0078010  
O 1.1560750 -0.5095270 1.5174330  
H 1.5847960 0.3676050 1.4586660  
C 3.8042840 0.5705310 0.1695590  
H 4.6141270 1.1544610 -0.2742160  
H 4.2461990 -0.1757880 0.8436010  
O 2.9072760 1.4220630 0.8769910  
H 3.4002130 1.9774190 1.4848900  
O 0.4506570 1.1952610 -0.9213150  
H 4.3362670 -1.5594360 -1.3503350  
H -0.5690220 -0.5067250 -1.3684750  
C -3.6389970 -0.6724500 -0.5511400  
N -3.4143590 0.6026990 -0.8604270  
C -2.3684500 1.1763430 -0.2544750  
C -1.3583990 0.3599680 0.4907750  
C -2.0102620 -0.8796290 1.0034820  
N -3.0615690 -1.4167780 0.4350750  
H -0.9219400 0.9429820 1.3033950

N -4.5950370 -1.3049230 -1.2421630  
H -5.0954750 -0.8050500 -1.9578060  
H -4.8351190 -2.2506410 -0.9978060  
N -2.1721890 2.4623000 -0.3368270  
H -2.8117740 2.9864940 -0.9179400  
H -1.2736930 2.8792970 0.1019040  
N -1.4706320 -1.4640490 2.0716850  
H -1.8474800 -2.3498250 2.3732950  
H -0.5604660 -1.1507250 2.3964440  
O 0.1088750 2.8761400 0.7430080  
H 0.4200710 2.0394310 -0.0993810  
H 0.7243910 3.6097560 0.7370400

**INT8<sub>H2O</sub>**

H = -1079.150188 a.u.

H = -1079.223530 a.u.

C -2.8329670 -0.8737450 0.3869230  
O -2.1872650 -2.1084890 0.5279600  
C -0.1544630 0.5842820 0.3321660  
C -0.7884270 -0.0491850 -0.9209430  
C -2.3115360 -0.0757810 -0.8223500  
H -2.7197720 -0.2433820 1.2815860  
H -0.4361630 -1.0760060 -1.0112540  
H -2.6938240 -0.5253630 -1.7480360  
O -2.7262780 1.2934310 -0.7497790  
H -3.6875740 1.2992120 -0.6447870  
O -0.3859920 0.6174500 -2.0990870  
H -0.8679450 1.4506110 -2.1420050  
C -4.3087870 -1.2046830 0.2198990  
H -4.6780310 -1.6708060 1.1370710  
H -4.4092770 -1.9144770 -0.6082480

|                            |            |            |            |   |            |            |            |
|----------------------------|------------|------------|------------|---|------------|------------|------------|
| O                          | -5.0122360 | 0.0066960  | -0.0595960 | C | 1.0276700  | -0.5969730 | -0.9627100 |
| H                          | -5.9411160 | -0.1839850 | -0.2028040 | C | 2.4888780  | -0.3372790 | -0.6282930 |
| O                          | -0.3408100 | 2.0074990  | 0.3279050  | H | 2.4975130  | 0.9686720  | 1.0801390  |
| H                          | -1.2665660 | -1.9895810 | 0.8520180  | H | 0.6821540  | 0.1726530  | -1.6529490 |
| H                          | -0.6392280 | 0.1736690  | 1.2195720  | H | 3.0751770  | -0.4292300 | -1.5513070 |
| C                          | 3.5975480  | -1.0486910 | -0.2642670 | O | 2.8683870  | -1.3852440 | 0.2796130  |
| N                          | 2.7687460  | -1.7713290 | 0.4507820  | H | 3.7886450  | -1.2211490 | 0.5304430  |
| C                          | 1.5393710  | -1.2402910 | 0.7147430  | O | 0.8806590  | -1.8497530 | -1.6111020 |
| C                          | 1.3323150  | 0.2579060  | 0.5130490  | H | 1.4735490  | -2.4746530 | -1.1781680 |
| C                          | 2.3121260  | 0.8137200  | -0.4986720 | C | 4.1856580  | 1.4433810  | -0.1332520 |
| N                          | 3.4021550  | 0.1866530  | -0.8351880 | H | 4.3755990  | 2.3583000  | 0.4333350  |
| H                          | 1.6401590  | 0.7305380  | 1.4592780  | H | 4.3982750  | 1.6259500  | -1.1920810 |
| N                          | 4.8170620  | -1.5632600 | -0.5187020 | O | 4.9712000  | 0.3557590  | 0.3634500  |
| H                          | 5.0290610  | -2.4934880 | -0.2016700 | H | 5.9038160  | 0.5525170  | 0.2581140  |
| H                          | 5.4406620  | -1.0627550 | -1.1272260 | O | 0.3215240  | -1.7720350 | 1.0617630  |
| N                          | 0.5630640  | -1.9388420 | 1.1747350  | H | 1.0622830  | 2.1130430  | -0.1796450 |
| H                          | 0.8914180  | -2.8959630 | 1.3044240  | H | 0.5925980  | 0.2755410  | 0.9434730  |
| H                          | 0.8188450  | 3.0685360  | 3.3689920  | C | -3.7079600 | 0.8559000  | -0.2826500 |
| N                          | 2.1101360  | 2.0469250  | -0.9601330 | N | -2.8326530 | 1.7306800  | 0.1753770  |
| H                          | 1.2373800  | 2.5178400  | -0.7739750 | C | -1.5357540 | 1.3106160  | 0.2952080  |
| H                          | 2.7799460  | 2.4189560  | -1.6146960 | C | -1.2708650 | -0.1207000 | 0.1647730  |
| O                          | 1.1950200  | 2.6648460  | 2.5852020  | C | -2.2664130 | -0.8768540 | -0.5062660 |
| H                          | -1.2813130 | 2.1566890  | 0.1391820  | N | -3.4980090 | -0.4191570 | -0.6928860 |
| H                          | 0.5045990  | 2.6860860  | 1.9080030  | H | -1.7256270 | -0.7033950 | 1.7333900  |
| <b>TS8_9<sub>H2O</sub></b> |            |            |            | N | -4.9941500 | 1.2862390  | -0.4184850 |
| H = -1079.110982 a.u.      |            |            |            | H | -5.2385440 | 2.1713860  | -0.0100780 |
| G = -1079.179539 a.u.      |            |            |            | H | -5.7048100 | 0.6010410  | -0.6056000 |
| C                          | 2.7227060  | 1.0532090  | 0.0063850  | N | -0.5509720 | 2.1382770  | 0.5429330  |
| O                          | 1.9654990  | 2.0516730  | -0.6052680 | H | -0.9398000 | 3.0728680  | 0.6451890  |
| C                          | 0.1679130  | -0.4988890 | 0.3061820  | H | -1.2955330 | -0.7322560 | 3.3116000  |

N -2.0223280 -2.1644800 -0.8939550  
H -1.0738920 -2.3889830 -1.1685120  
H -2.7584410 -2.5616770 -1.4587270  
O -1.4457860 -1.3046030 2.5498320  
H 1.2784250 -1.8947640 1.2130460  
H -0.4674650 -1.6676050 1.9948890

**INT9<sub>H2O</sub>**

H = -1079.144002 a.u.

G = -1079.218854 a.u.

C 2.3918160 -1.4257910 -0.6223940  
O 1.5802440 -2.5492730 -0.3261050  
C 0.0112780 0.2956680 -0.0109180  
C 0.9841380 -0.1464290 1.0645850  
C 2.3859970 -0.3692350 0.5023750  
H 2.0609030 -0.9317440 -1.5443650  
H 0.6561030 -1.1133360 1.4560880  
H 3.0104900 -0.7152480 1.3372040  
O 2.8796670 0.8610710 0.0004000  
H 3.7477380 0.6841670 -0.3844540  
O 0.9835470 0.7322670 2.1720070  
H 1.1180230 1.6552450 1.8400040  
C 3.7845710 -1.9997220 -0.8379040  
H 3.7744770 -2.6511390 -1.7160080  
H 4.0488220 -2.5939150 0.0440880  
O 4.6885010 -0.9139480 -1.0122130  
H 5.5855680 -1.2441970 -1.0901220  
O 1.4311480 3.0570060 0.9685160  
H 0.6708070 -2.3570740 -0.5717980  
H 0.4282100 0.7227260 -0.9213550  
C -3.7165580 -0.9676930 -0.3146620

N -3.3067080 -0.2404380 -1.3264170  
C -2.1749490 0.5082160 -1.1399530  
C -1.3238620 0.1806810 0.0458960  
C -2.0862980 -0.4085970 1.1729750  
N -3.2317660 -1.0033140 0.9723000  
H -0.7534660 4.3360950 -1.2732290  
N -4.7843000 -1.7712990 -0.5063080  
H -5.2834980 -1.7046220 -1.3770860  
H -5.2045660 -2.2124670 0.2934300  
N -1.7880750 1.4233340 -1.9528980  
H -2.4401370 1.4666480 -2.7352920  
H -0.7686390 2.7906900 -1.4850190  
N -1.5946190 -0.3313320 2.4115950  
H -0.7535710 0.2061620 2.6215410  
H -2.1549000 -0.7229320 3.1530830  
O -0.2259330 3.5457970 -1.1471480  
H 2.1715970 2.6687640 0.4856740  
H 0.7901240 3.3115750 0.2760520

**INT10<sub>H2O</sub>**

H = -1002.722401 a.u.

G = -1002.790933 a.u.

C 2.4114500 0.3723550 -0.4347020  
O 1.4350480 0.6917000 -1.4107450  
C -0.1405240 0.0047100 0.9627110  
C 0.8853230 -1.0992340 1.0501170  
C 2.0898030 -1.0453440 0.0506180  
H 2.3713320 1.0822480 0.4007550  
H 0.3855680 -2.0641530 0.8920450  
H 1.8231310 -1.6267920 -0.8382540  
O 3.1666630 -1.7074370 0.6885060

|                              |            |            |            |   |            |            |            |
|------------------------------|------------|------------|------------|---|------------|------------|------------|
| H                            | 3.9647100  | -1.1637250 | 0.6240570  | C | 2.5516480  | 0.4538380  | -0.2923390 |
| O                            | 1.3683600  | -1.0132430 | 2.3727790  | O | 1.4516950  | 0.9752330  | -0.9498040 |
| H                            | 2.2104060  | -1.4868490 | 2.3791880  | C | -0.0519120 | 0.1162160  | 0.6823340  |
| C                            | 3.7748350  | 0.4849970  | -1.1075470 | C | 0.9373880  | -0.9680970 | 1.0186960  |
| H                            | 3.8464900  | 1.4738530  | -1.5681910 | C | 2.1731060  | -0.9829310 | 0.0872030  |
| H                            | 3.8604440  | -0.2785190 | -1.8905470 | H | 2.7983980  | 1.0075680  | 0.6296980  |
| O                            | 4.7844140  | 0.3121180  | -0.1134140 | H | 0.4576160  | -1.9533590 | 0.9774520  |
| H                            | 5.6533720  | 0.3846820  | -0.5143960 | H | 1.9167000  | -1.4988450 | -0.8509170 |
| H                            | 1.0094000  | 1.5306720  | -1.1349720 | O | 3.1609610  | -1.7171070 | 0.7811190  |
| H                            | 0.0086600  | 0.7756800  | 1.7160780  | H | 4.0260340  | -1.4103440 | 0.4733830  |
| C                            | -3.8236140 | -0.4449880 | -0.1749450 | O | 1.3461190  | -0.6916980 | 2.3408150  |
| N                            | -3.6044680 | 0.6757240  | 0.4691640  | H | 2.2051590  | -1.1231170 | 2.4457070  |
| C                            | -2.3040650 | 1.1074780  | 0.5405600  | C | 3.7592640  | 0.4955460  | -1.2238360 |
| C                            | -1.2586330 | 0.0930100  | 0.2325930  | H | 3.9651350  | 1.5385630  | -1.4798390 |
| C                            | -1.6872430 | -0.8659770 | -0.7950650 | H | 3.5131700  | -0.0524810 | -2.1410500 |
| N                            | -2.9409440 | -1.1690630 | -0.9568230 | O | 4.8829390  | -0.0964950 | -0.5630800 |
| N                            | -5.0715710 | -0.9554300 | -0.1649090 | H | 5.6546380  | -0.0574490 | -1.1313170 |
| H                            | -5.8050790 | -0.4298420 | 0.2792900  | H | 1.0904960  | 2.0224640  | -0.5120390 |
| H                            | -5.2849040 | -1.7290400 | -0.7701300 | H | 0.1704730  | 1.0343020  | 1.2202160  |
| N                            | -1.9497760 | 2.2900060  | 0.8923750  | C | -3.9039130 | -0.3953680 | -0.1886450 |
| H                            | -2.7741230 | 2.8368980  | 1.1360470  | N | -3.5670920 | 0.8407270  | 0.1647830  |
| N                            | -0.7316160 | -1.4100230 | -1.5721650 | C | -2.2541080 | 1.1139030  | 0.2242980  |
| H                            | -1.0560670 | -1.9748460 | -2.3441140 | C | -1.2788900 | 0.0247450  | 0.1032510  |
| H                            | 0.1098440  | -0.8527050 | -1.7052270 | C | -1.8085490 | -1.1491790 | -0.5672850 |
| O                            | 0.4863010  | 2.8788230  | -0.1781850 | N | -3.0970800 | -1.3775080 | -0.6716260 |
| H                            | 0.5447830  | 3.8003210  | -0.4363650 | N | -5.2075860 | -0.7113250 | -0.1303580 |
| H                            | -0.3896130 | 2.7658950  | 0.2836700  | H | -5.8695400 | -0.0079090 | 0.1497980  |
| <b>TS10_11<sub>H2O</sub></b> |            |            |            | H | -5.5110410 | -1.6103930 | -0.4627110 |
| H = -1002.717118 a.u.        |            |            |            | N | -1.8543090 | 2.3452730  | 0.4309960  |
| G = -1002.783380 a.u.        |            |            |            | H | -2.5989000 | 3.0166260  | 0.5612210  |

N -0.9526390 -2.0407100 -1.0958990  
H -1.3535270 -2.8026770 -1.6221050  
H -0.0189970 -1.7367020 -1.3274520  
O 0.5996390 2.9691830 0.0432980  
H 0.8429960 3.7936260 -0.3790310  
H -0.8128960 2.6799730 0.2828680

**INT11<sub>H2O</sub>**

H = -1002.758353 a.u.

G = -1002.826288 a.u.

C 2.4242470 0.2992740 -0.3818070  
O 1.0859190 0.5147010 -0.8002410  
C 0.2594940 0.4568820 0.4048580  
C 1.0148290 -0.4929410 1.3757340  
C 2.2964210 -0.8613310 0.6060160  
H 2.8158630 1.1791750 0.1483150  
H 0.4217490 -1.3777160 1.6188510  
H 2.1319520 -1.7923770 0.0484400  
O 3.3743890 -0.9965330 1.4980500  
H 4.1853930 -1.0075010 0.9764150  
O 1.3209520 0.2425460 2.5380250  
H 2.1465520 -0.1094220 2.8921360  
C 3.2817030 -0.0222580 -1.5860130  
H 3.3970380 0.8558520 -2.2290800  
H 2.8020210 -0.8250840 -2.1597950  
O 4.5340250 -0.4475610 -1.0614910  
H 5.1456840 -0.6279500 -1.7779790  
H 0.5607390 2.2609780 -1.2673910  
H 0.3038070 1.4385920 0.8831450  
C -3.6930190 -0.7028810 -0.1861580  
N -3.5087780 0.5509650 0.2221300

C -2.2393520 0.9632300 0.3295830  
C -1.1507550 0.1088960 0.0652770  
C -1.4986950 -1.1367680 -0.4742970  
N -2.7550820 -1.5609050 -0.6013170  
N -4.9786870 -1.1616570 -0.1913500  
H -5.7071730 -0.4715090 -0.1184530  
H -5.1607460 -1.9998680 -0.7170120  
N -2.0608360 2.2517090 0.7472530  
H -2.9203510 2.7780490 0.7906330  
N -0.5114390 -2.0128440 -0.8796960  
H -0.8799530 -2.8087530 -1.3811330  
H 0.2838750 -1.5706290 -1.3189910  
O 0.2217790 3.1400780 -1.0367760  
H -0.0277950 3.5568250 -1.8635660  
H -1.2606440 2.7519930 0.3766270

**INT6<sub>2H2O</sub>**

H = -1155.572908 a.u.

G = -1155.654761 a.u.

C 2.6049790 1.6772350 0.2217800  
O 2.5339080 2.4252960 -0.9921010  
C -0.1078330 1.3231310 -1.2320550  
C 0.1007830 0.9975770 0.2348670  
C 1.2388210 1.8098710 0.8848990  
H 3.3332730 2.1364520 0.9004130  
H 0.3756050 -0.0570180 0.2924870  
H 1.3173840 1.4319140 1.9054830  
O 0.8570030 3.1678280 0.9784750  
H 1.0920660 3.5905870 0.1433190  
O -1.0780460 1.1667420 0.9704200  
H -1.1985190 2.1119510 1.1351700

|   |            |            |            |                                    |
|---|------------|------------|------------|------------------------------------|
| C | 3.0040210  | 0.2327620  | -0.0688620 | <b>TS6_7<sub>2H2O</sub></b>        |
| H | 4.0280410  | 0.2230840  | -0.4657030 | H = -1155.559563 a.u.              |
| H | 2.3550200  | -0.1701680 | -0.8535230 | G = -1155.637551 a.u.              |
| O | 2.9292810  | -0.5348980 | 1.1108280  | C 3.0992600 -0.6105640 -0.8263920  |
| H | 2.4324410  | -1.3485030 | 0.9167020  | O 2.4731030 -0.5481370 -2.0940740  |
| O | -1.0687780 | 1.9336260  | -1.6363270 | C 0.1490600 0.3967920 -0.4801410   |
| H | 3.4182910  | 2.6055400  | -1.3191030 | C 1.1693400 0.2843450 0.6605090    |
| H | 0.6640750  | 0.9697180  | -1.9337480 | C 2.5982480 0.4892720 0.1230700    |
| C | 0.7208610  | -2.3714370 | -0.9455800 | H 4.1808220 -0.4570620 -0.9325870  |
| N | -0.4027730 | -1.9890490 | -1.5394990 | H 1.1306390 -0.7143350 1.0976830   |
| C | -1.4539350 | -1.7668460 | -0.7226790 | H 3.2490200 0.4976790 1.0003640    |
| C | -1.3758560 | -1.9644570 | 0.6616080  | O 2.7436770 1.7482980 -0.5143060   |
| C | -0.1285600 | -2.3006390 | 1.1637790  | H 1.9337960 1.8925630 -1.0283240   |
| N | 0.9453650  | -2.5002120 | 0.3672590  | O 0.9024560 1.1819840 1.7216990    |
| H | -2.2210860 | -1.7430360 | 1.2986360  | H 0.9004950 2.0967310 1.3959970    |
| N | 1.8091910  | -2.5846090 | -1.7654720 | C 2.8495390 -2.0212200 -0.3213690  |
| H | 1.5750320  | -2.7423910 | -2.7336290 | H 3.3798440 -2.7253020 -0.9703510  |
| H | 2.5188200  | -3.1896550 | -1.3812810 | H 1.7760030 -2.2417600 -0.3855830  |
| N | -2.5973030 | -1.3430290 | -1.3030620 | O 3.3155790 -2.0903330 1.0163350   |
| H | -2.5345660 | -1.0620530 | -2.2682530 | H 3.2639280 -2.9983690 1.3202860   |
| H | -3.3123040 | -0.9283830 | -0.7120840 | O 0.0689120 1.5113290 -1.0990660   |
| N | 0.0933590  | -2.4422320 | 2.5073170  | H 2.6617300 0.3145420 -2.4756900   |
| H | 1.0591810  | -2.4414090 | 2.7976370  | H 0.0779920 -0.5217860 -1.0821430  |
| H | -0.5537200 | -1.9861070 | 3.1300600  | C -2.3017930 -2.2769920 -0.3037920 |
| O | -4.1257540 | 0.0107450  | 0.7597460  | N -2.7315070 -1.2690840 -1.0659670 |
| H | -3.7850920 | 0.9147450  | 0.6389040  | C -2.4359970 -0.0430720 -0.6208260 |
| H | -5.0478160 | 0.1119710  | 1.0023830  | C -1.5634360 0.1669970 0.5024880   |
| O | -3.2661640 | 2.6005740  | -0.0006560 | C -1.4241840 -0.9924870 1.3390550  |
| H | -2.5267770 | 2.3636110  | -0.5890540 | N -1.7060460 -2.2138400 0.9070240  |
| H | -3.7955070 | 3.2405880  | -0.4802360 | H -1.5780100 1.1404640 0.9773310   |



|                            |            |            |            |   |            |            |            |
|----------------------------|------------|------------|------------|---|------------|------------|------------|
| N                          | -2.5042740 | -3.5210370 | -0.7846740 | C | 2.6207420  | -2.2030060 | -0.7360180 |
| H                          | -3.0398700 | -3.6300940 | -1.6287020 | H | 3.0257730  | -2.7553900 | -1.5898810 |
| H                          | -2.3198730 | -4.3072050 | -0.1860070 | H | 1.5324100  | -2.3402610 | -0.7303630 |
| N                          | -2.9038670 | 1.0037140  | -1.2873740 | O | 3.1941630  | -2.6394390 | 0.4888410  |
| H                          | -3.3957050 | 0.8371450  | -2.1506730 | H | 3.1721660  | -3.5972270 | 0.5243280  |
| H                          | -2.7068150 | 1.9503450  | -0.9702740 | O | 0.3677260  | 1.2610440  | -1.0398890 |
| N                          | -0.9441420 | -0.8543390 | 2.5892970  | H | 1.6173390  | 0.3193100  | -1.9446060 |
| H                          | -0.6977600 | -1.7021530 | 3.0765370  | H | 0.0761030  | -0.7495600 | -0.8443380 |
| H                          | -0.4415650 | -0.0019160 | 2.8110670  | C | -2.6993460 | -1.9172470 | -0.2879380 |
| O                          | -2.4844390 | 3.4875980  | 0.1298690  | N | -2.8756230 | -0.8655050 | -1.0926070 |
| H                          | -1.5746920 | 3.7831460  | 0.3150690  | C | -2.3236320 | 0.2749540  | -0.6860350 |
| H                          | -3.0603950 | 3.9280770  | 0.7563920  | C | -1.3395090 | 0.3127360  | 0.4311400  |
| O                          | 0.2161990  | 3.6289390  | 0.3796400  | C | -1.5986730 | -0.8259760 | 1.3600580  |
| H                          | 0.1747990  | 2.8809730  | -0.2878160 | N | -2.1816910 | -1.9363390 | 0.9669800  |
| H                          | 0.8903490  | 4.2445800  | 0.0828850  | H | -1.3385260 | 1.2734700  | 0.9476650  |
| <b>INT7<sub>2H2O</sub></b> |            |            |            | N | -3.1384190 | -3.0968890 | -0.7397130 |
| H = -1155.568647 a.u.      |            |            |            | H | -3.5671020 | -3.1461750 | -1.6488220 |
| G = -1155.644218 a.u.      |            |            |            | H | -3.0746870 | -3.9064010 | -0.1458810 |
| C                          | 2.9643780  | -0.7280770 | -0.9227440 | N | -2.5958160 | 1.3830200  | -1.3291940 |
| O                          | 2.3802680  | -0.2663670 | -2.1238350 | H | -3.1784740 | 1.3184910  | -2.1514550 |
| C                          | 0.1279850  | 0.1840450  | -0.2542650 | H | -2.2196950 | 2.2904970  | -1.0328780 |
| C                          | 1.1904280  | -0.0247780 | 0.8491300  | N | -1.1785270 | -0.7170500 | 2.6162200  |
| C                          | 2.6308650  | 0.1210170  | 0.3129490  | H | -1.2493520 | -1.5341770 | 3.2044810  |
| H                          | 4.0505480  | -0.6522970 | -1.0451980 | H | -0.5059060 | 0.0164290  | 2.8362280  |
| H                          | 1.1031080  | -1.0385280 | 1.2547850  | O | 0.6036400  | 3.2413860  | 0.4497860  |
| H                          | 3.2846040  | -0.2126030 | 1.1211580  | H | 0.5477960  | 2.4494080  | -0.2420010 |
| O                          | 2.9715670  | 1.4743040  | 0.0763690  | H | 1.4400870  | 3.6936970  | 0.3161390  |
| H                          | 2.5366510  | 1.7250790  | -0.7471170 | O | -1.8565040 | 3.8610770  | -0.2370640 |
| O                          | 0.9975520  | 0.8550170  | 1.9474970  | H | -0.9194730 | 3.8472780  | 0.0666840  |
| H                          | 1.1010280  | 1.7691130  | 1.6267200  | H | -2.3505790 | 4.4009970  | 0.3812540  |

**TS7\_8<sub>2</sub>H<sub>2</sub>O**

H = -1155.567548 a.u.

G = -1155.639216 a.u.

C 3.0599120 -0.6300420 -0.8717920  
O 2.5336770 -0.2327850 -2.1243990  
C 0.1031300 0.1522750 -0.2612070  
C 1.2012880 0.0768010 0.8224680  
C 2.6430430 0.2688120 0.3001760  
H 4.1473380 -0.5307630 -0.9502090  
H 1.1695390 -0.9283480 1.2583000  
H 3.2783450 0.0011880 1.1468140  
O 2.9367860 1.6206980 0.0174990  
H 2.6271260 1.8191450 -0.8719540  
O 0.9554900 0.9773610 1.8837050  
H 0.9011310 1.8862700 1.5066500  
C 2.7435830 -2.1038070 -0.6353300  
H 3.2054260 -2.6826960 -1.4412230  
H 1.6601720 -2.2730980 -0.6784010  
O 3.2632470 -2.4657540 0.6351810  
H 3.2705870 -3.4212460 0.7151060  
O 0.3072470 1.1803050 -1.1871880  
H 1.7066090 0.2612530 -2.0162010  
H 0.1057400 -0.7854250 -0.8287770  
C -2.6171970 -1.9695370 -0.3211560  
N -2.8408550 -0.9274690 -1.1117530  
C -2.3676840 0.2513010 -0.6769420  
C -1.3204020 0.2918100 0.4022660  
C -1.5519950 -0.8593580 1.3429320  
N -2.1109740 -1.9749260 0.9499570  
H -1.3459450 1.2476770 0.9280570

N -2.9820970 -3.1746980 -0.7766500  
H -3.4194720 -3.2451130 -1.6803120  
H -2.9049550 -3.9732670 -0.1699740  
N -2.7575820 1.3710150 -1.2017750  
H -3.4123310 1.2856720 -1.9700670  
H -2.4357650 2.3749260 -0.7833340  
N -1.1298080 -0.7245620 2.5958410  
H -1.1864850 -1.5297390 3.2018320  
H -0.4876870 0.0388110 2.8078950  
O 0.3006610 3.1610080 0.4292570  
H 0.3684190 2.0492880 -0.6696920  
H 0.9053370 3.8987990 0.3286730  
O -1.9719070 3.5335210 -0.1842880  
H -0.8377450 3.4608040 0.1684100  
H -2.5298470 3.9959830 0.4424470

**INT8<sub>2</sub>H<sub>2</sub>O**

H = -1155.564666 a.u.

G = -1155.643763 a.u.

C 3.1445060 -0.8305920 -0.4724640  
O 2.6429070 -2.1261840 -0.3091870  
C 0.3437330 0.4572970 -0.2503370  
C 1.1929650 0.0362330 0.9713210  
C 2.6860070 0.1058060 0.6577550  
H 2.8405240 -0.3872350 -1.4318040  
H 0.9371590 -0.9851030 1.2542680  
H 3.2248210 -0.1593220 1.5776280  
O 2.9382720 1.4778140 0.3327170  
H 3.8697350 1.5494710 0.0814540  
O 0.9246480 0.8624450 2.0934980  
H 1.4844580 1.6431670 2.0090950

C 4.6599000 -0.9756810 -0.4710850  
 H 4.9627120 -1.5573660 -1.3454030  
 H 4.9510940 -1.5159870 0.4361740  
 O 5.2409950 0.3290060 -0.4946350  
 H 6.1972970 0.2594510 -0.4745600  
 O 0.3070610 1.8831070 -0.3582070  
 H 1.6911280 -2.1456670 -0.5624310  
 H 0.8088930 0.0489750 -1.1496630  
 C -3.2919260 -1.5290160 0.2859550  
 N -2.3707850 -2.1851160 -0.3750640  
 C -1.1493660 -1.5852510 -0.4985330  
 C -1.0866930 -0.0793160 -0.2850920  
 C -2.0691390 0.3198580 0.7934600  
 N -3.1630960 -0.3567160 0.9992710  
 H -1.5646220 0.3413870 -1.1866140  
 N -4.5301110 -2.0575770 0.3470750  
 H -4.6951310 -2.9552630 -0.0753480  
 H -5.2106730 -1.6393030 0.9568570  
 N -0.0906040 -2.2193210 -0.8530390  
 H -0.3443870 -3.1938870 -1.0180330  
 H -4.2191170 1.0881100 -0.7825730  
 N -1.8825140 1.4641340 1.4478780  
 H -2.5539820 1.7064810 2.1604640  
 H -0.9749900 1.9057290 1.4419880  
 O -3.7574350 1.2916590 -1.6000300  
 H 1.2301140 2.1780420 -0.3661720  
 H -3.2667880 2.1095290 -1.4227500  
 O -1.9083600 3.3937060 -1.2210480  
 H -1.0985270 2.9241960 -0.9630960  
 H -1.6945550 3.8583170 -2.0330880

**TS8\_9<sub>2</sub>H<sub>2</sub>O**

H = -1155.536553 a.u.

G = -1155.610692 a.u.

C 2.8457950 1.0345210 0.2631420  
 O 2.1390090 2.2114780 0.0216010  
 C 0.2463860 -0.5058490 0.0185730  
 C 1.1232750 -0.1590650 -1.1998300  
 C 2.5904860 -0.0360020 -0.8185740  
 H 2.5903570 0.5900510 1.2376790  
 H 0.7792200 0.8008430 -1.5854270  
 H 3.1591470 0.2157350 -1.7234900  
 O 2.9791480 -1.3413780 -0.3623900  
 H 3.8978850 -1.2781180 -0.0652600  
 O 0.9659890 -1.1179320 -2.2358610  
 H 1.6116620 -1.8179220 -2.0861150  
 C 4.3200430 1.4090340 0.2913720  
 H 4.5099330 2.0743220 1.1374260  
 H 4.5602990 1.9348610 -0.6388120  
 O 5.0810680 0.2027340 0.4053860  
 H 6.0171280 0.4035070 0.3489310  
 O 0.3954030 -1.9271150 0.3306350  
 H 1.1919850 2.1335970 0.3386370  
 H 0.6300440 0.0499510 0.8762080  
 C -3.6079880 0.9876010 -0.4208500  
 N -2.7475990 1.7271140 0.2622770  
 C -1.4537000 1.2769070 0.3255810  
 C -1.1841690 -0.0856980 -0.1112070  
 C -2.1597180 -0.6793720 -0.9391350  
 N -3.3883380 -0.1728090 -1.0707990  
 H -2.1385190 -0.5651140 1.3386500

|                            |            |            |            |   |            |            |            |
|----------------------------|------------|------------|------------|---|------------|------------|------------|
| N                          | -4.8817610 | 1.4711420  | -0.5253600 | C | 4.4710330  | -1.5449620 | -0.5422700 |
| H                          | -5.1329070 | 2.2453230  | 0.0646690  | H | 4.6307070  | -2.3222220 | -1.2946040 |
| H                          | -5.5935920 | 0.8382230  | -0.8467030 | H | 4.8251310  | -1.9099310 | 0.4284640  |
| N                          | -0.4877340 | 2.0115200  | 0.8278090  | O | 5.1272430  | -0.3349810 | -0.9036280 |
| H                          | -0.8850890 | 2.9040270  | 1.1124320  | H | 6.0766890  | -0.4699640 | -0.9198410 |
| H                          | -2.5589890 | 0.0035880  | 2.7513710  | O | 1.0854650  | 3.1647670  | 0.5002680  |
| N                          | -1.9260870 | -1.8657450 | -1.5777490 | H | 1.5032950  | -2.5252120 | -0.2150500 |
| H                          | -2.6356610 | -2.0981600 | -2.2566770 | H | 0.6688920  | 0.3299290  | -1.0972520 |
| H                          | -0.9699730 | -2.0428090 | -1.8549040 | C | -3.3855370 | -1.4931900 | -0.2083310 |
| O                          | -2.4344900 | -0.8300980 | 2.2811890  | N | -2.9822000 | -0.9720840 | -1.3437270 |
| H                          | 1.3473490  | -2.1190290 | 0.2495850  | C | -1.8509550 | -0.1889980 | -1.3131770 |
| H                          | -1.4705870 | -1.5340140 | 2.5869560  | C | -1.0304880 | -0.2001580 | -0.0605500 |
| O                          | -0.5304170 | -2.2275400 | 2.5926930  | C | -1.7840260 | -0.6009180 | 1.1483580  |
| H                          | -0.0943950 | -2.1656020 | 1.6197230  | N | -2.9109620 | -1.2638160 | 1.0604800  |
| H                          | 0.1172040  | -1.9854820 | 3.2614220  | H | -3.8979170 | 1.3912700  | 0.8795460  |
| <b>INT9<sub>2H2O</sub></b> |            |            |            | N | -4.4613690 | -2.3084290 | -0.2374430 |
| H = -1155.556625 a.u.      |            |            |            | H | -4.8558270 | -2.5639490 | -1.1263180 |
| G = -1155.637815 a.u.      |            |            |            | H | -4.7731230 | -2.7395750 | 0.6151170  |
| C                          | 2.9811160  | -1.2580260 | -0.4246550 | N | -1.4570260 | 0.5240200  | -2.3032610 |
| O                          | 2.4183870  | -2.4609930 | 0.0711300  | H | -2.0872620 | 0.3746590  | -3.0908060 |
| C                          | 0.2852820  | 0.0547930  | -0.1163690 | H | -3.9111720 | 1.2325130  | -0.6430380 |
| C                          | 1.2827660  | -0.0259080 | 1.0228840  | N | -1.3160660 | -0.2821730 | 2.3550820  |
| C                          | 2.7154050  | -0.0498790 | 0.4964680  | H | -1.8673280 | -0.5696870 | 3.1495820  |
| H                          | 2.5830720  | -1.0157070 | -1.4176020 | H | -0.5117900 | 0.3398980  | 2.4713980  |
| H                          | 1.1273720  | -0.9674980 | 1.5590570  | O | -3.6135770 | 1.8150120  | 0.0650460  |
| H                          | 3.3742430  | -0.1029060 | 1.3736570  | H | 1.7917870  | 2.8559800  | -0.0791670 |
| O                          | 2.9467860  | 1.1527090  | -0.2183230 | H | -1.9906330 | 2.8777500  | -0.5096010 |
| H                          | 3.8482920  | 1.1109770  | -0.5629550 | O | -1.1850630 | 3.0707040  | -1.0088540 |
| O                          | 1.0966310  | 0.9947660  | 1.9821940  | H | 0.2747300  | 3.2255800  | -0.0484650 |
| H                          | 1.0898870  | 1.8748320  | 1.5174950  | H | -1.1202270 | 2.3182380  | -1.6243430 |

**INT10<sub>2</sub>H<sub>2</sub>O**

H = -1079.139150 a.u.

G = -1079.214983 a.u.

|   |            |            |            |
|---|------------|------------|------------|
| C | 2.3302900  | -0.3430270 | -0.8525060 |
| O | 1.3076890  | 0.3290660  | -1.5391030 |
| C | -0.1275690 | 0.6955680  | 0.7900340  |
| C | 1.1366990  | 0.1319860  | 1.3677920  |
| C | 1.8234190  | -0.9205600 | 0.4827260  |
| H | 3.1708250  | 0.3272370  | -0.6319160 |
| H | 0.9619900  | -0.3559820 | 2.3321250  |
| H | 1.1090120  | -1.7300020 | 0.2836820  |
| O | 2.8993450  | -1.3744310 | 1.2892490  |
| H | 3.4835020  | -1.9025520 | 0.7279500  |
| O | 2.0271500  | 1.2160440  | 1.6028390  |
| H | 2.8591470  | 0.8180610  | 1.8899300  |
| C | 2.8051210  | -1.4489570 | -1.7879090 |
| H | 3.2250910  | -0.9882920 | -2.6858740 |
| H | 1.9364440  | -2.0534210 | -2.0720280 |
| O | 3.7814180  | -2.2450880 | -1.1165290 |
| H | 4.0720590  | -2.9576240 | -1.6887950 |
| H | 1.4565520  | 1.2911890  | -1.4375350 |
| H | -0.0141350 | 1.7106910  | 0.4233980  |
| C | -3.4398620 | -1.0951810 | -0.5411220 |
| N | -3.3681410 | 0.1840730  | -0.7798210 |
| C | -2.3854060 | 0.9019020  | -0.1409340 |
| C | -1.3386650 | 0.1418770  | 0.6181860  |
| C | -1.7364590 | -1.2361480 | 0.9633250  |
| N | -2.7285700 | -1.8378090 | 0.3837030  |
| N | -4.3406820 | -1.8298850 | -1.2251600 |
| H | -4.9631730 | -1.3627320 | -1.8620150 |

|   |            |            |            |
|---|------------|------------|------------|
| H | -4.4838000 | -2.7911980 | -0.9703080 |
| N | -2.3242040 | 2.1813840  | -0.2187800 |
| H | -3.0849340 | 2.4972180  | -0.8194470 |
| N | -1.0452450 | -1.9370550 | 1.8952020  |
| H | -1.4475260 | -2.8271160 | 2.1498500  |
| H | -0.5135330 | -1.4572680 | 2.6000610  |
| O | -0.3772220 | 4.1242490  | -0.0056710 |
| H | -0.5575980 | 4.7552760  | 0.6924730  |
| H | -1.1207360 | 3.4733160  | -0.0087920 |
| O | 1.9586990  | 2.8536910  | -0.7571270 |
| H | 2.1635380  | 2.5662670  | 0.1428580  |
| H | 1.2131400  | 3.4689620  | -0.6384220 |

**TS10\_11<sub>2</sub>H<sub>2</sub>O**

H = -1079.129560 a.u.

G = -1079.201757 a.u.

|   |            |            |            |
|---|------------|------------|------------|
| C | 2.4666630  | -0.1613760 | -0.6698600 |
| O | 1.5114170  | 0.7322920  | -1.1146150 |
| C | -0.0886510 | 0.4815470  | 0.7784460  |
| C | 1.0430120  | -0.2747880 | 1.3925350  |
| C | 1.8123890  | -1.1080270 | 0.3485460  |
| H | 3.3073040  | 0.3430800  | -0.1672920 |
| H | 0.6566310  | -0.9527430 | 2.1673930  |
| H | 1.1156050  | -1.7456690 | -0.2146690 |
| O | 2.7211460  | -1.8882890 | 1.1013780  |
| H | 3.3899300  | -2.2177700 | 0.4841570  |
| O | 1.9074450  | 0.6498360  | 2.0126850  |
| H | 2.6880190  | 0.1521630  | 2.2851030  |
| C | 3.0153450  | -0.9447920 | -1.8568190 |
| H | 3.5438260  | -0.2546910 | -2.5194540 |
| H | 2.1742070  | -1.3892680 | -2.4007820 |

|                                        |            |            |            |   |            |            |            |
|----------------------------------------|------------|------------|------------|---|------------|------------|------------|
| O                                      | 3.8959800  | -1.9623920 | -1.3666050 | C | 1.4393170  | -0.3523610 | 1.3585720  |
| H                                      | 4.2868240  | -2.4387870 | -2.1011940 | C | 1.5663670  | -1.5335110 | 0.4027530  |
| H                                      | 1.8406790  | 1.7639990  | -0.7818490 | H | 2.6710490  | -0.7167830 | -1.2606750 |
| H                                      | 0.0921310  | 1.5517520  | 0.7532960  | H | 1.0756020  | -0.6229380 | 2.3477570  |
| C                                      | -3.7970640 | -0.7397170 | -0.4076430 | H | 0.6797240  | -2.1680600 | 0.4788200  |
| N                                      | -3.5063460 | 0.5417370  | -0.5832990 | O | 2.7350490  | -2.2654830 | 0.7044550  |
| C                                      | -2.2886150 | 0.9523190  | -0.2037230 | H | 2.8432620  | -2.9297550 | 0.0148470  |
| C                                      | -1.3067120 | 0.0149960  | 0.3817400  | O | 2.7050760  | 0.2793730  | 1.4937770  |
| C                                      | -1.7966880 | -1.3653920 | 0.4773150  | H | 3.3613940  | -0.4289100 | 1.5350160  |
| N                                      | -3.0099420 | -1.7130310 | 0.1017770  | C | 0.8664030  | -1.6016210 | -2.0190250 |
| N                                      | -5.0233700 | -1.1387130 | -0.7792440 | H | 0.9453600  | -1.1098740 | -2.9929890 |
| H                                      | -5.6579460 | -0.4676110 | -1.1775320 | H | -0.1899740 | -1.6669990 | -1.7317310 |
| H                                      | -5.2833050 | -2.1036060 | -0.6694670 | O | 1.4869970  | -2.8843170 | -2.0293540 |
| N                                      | -2.0168220 | 2.2239420  | -0.3852870 | H | 1.0269270  | -3.4630300 | -2.6402700 |
| H                                      | -2.7802970 | 2.7437690  | -0.7962230 | H | 2.5096700  | 1.7772570  | -0.9558040 |
| N                                      | -1.0682290 | -2.3682680 | 0.9955550  | H | 0.7265670  | 1.6178080  | 0.8807410  |
| H                                      | -1.5152070 | -3.2723910 | 1.0029670  | C | -3.5510250 | -0.1388730 | -0.1068750 |
| H                                      | -0.0914390 | -2.3172300 | 1.2154580  | N | -3.0121850 | 0.9624620  | -0.6188480 |
| O                                      | 0.0019790  | 3.7148650  | 0.3112660  | C | -1.7337610 | 1.2015440  | -0.2991230 |
| H                                      | -0.0782020 | 4.6690790  | 0.2919510  | C | -0.9650010 | 0.3233010  | 0.5215530  |
| H                                      | -1.1471130 | 2.7851960  | -0.1168520 | C | -1.7086990 | -0.7200260 | 1.0861730  |
| O                                      | 2.1873950  | 2.8883910  | -0.2841170 | N | -2.9860890 | -0.9676890 | 0.7683580  |
| H                                      | 2.6340140  | 2.7056690  | 0.5467290  | N | -4.8168710 | -0.4534030 | -0.5204950 |
| H                                      | 1.0363200  | 3.4191540  | 0.0285940  | H | -5.3383940 | 0.2901410  | -0.9550010 |
| <b>INT11<sub>2</sub>H<sub>2</sub>O</b> |            |            |            | H | -5.3227400 | -1.1086610 | 0.0520910  |
| H = -1079.164560 a.u.                  |            |            |            | N | -1.2119720 | 2.3259900  | -0.8311850 |
| G = -1079.239098 a.u.                  |            |            |            | H | -1.8694530 | 2.9120310  | -1.3195750 |
| C                                      | 1.6214270  | -0.8239520 | -0.9605010 | N | -1.1920940 | -1.6325400 | 2.0020850  |
| O                                      | 1.0653170  | 0.4724730  | -0.7771990 | H | -1.9343270 | -2.2208540 | 2.3575930  |
| C                                      | 0.5267870  | 0.5879000  | 0.5703560  | H | -0.6365240 | -1.2413970 | 2.7461290  |

|                             |            |            |            |                            |            |            |            |
|-----------------------------|------------|------------|------------|----------------------------|------------|------------|------------|
| O                           | 1.0596090  | 3.9229130  | 0.1559390  | N                          | 3.2449930  | 1.1048230  | 0.6315020  |
| H                           | 1.1300730  | 4.8786440  | 0.1628700  | C                          | 1.9698440  | 1.1713610  | 0.2566350  |
| H                           | -0.3509690 | 2.7567010  | -0.5119220 | C                          | 1.2646530  | 0.0515910  | -0.3930130 |
| O                           | 3.1490740  | 2.3230630  | -0.4732500 | C                          | 2.0573510  | -1.1882470 | -0.3724260 |
| H                           | 3.2816030  | 1.7952880  | 0.3270880  | N                          | 3.3286940  | -1.2188960 | 0.0094430  |
| H                           | 1.9457550  | 3.5670640  | -0.0526460 | H                          | 0.9707060  | 0.5200140  | -1.5625940 |
| <b>TS7_12<sub>H2O</sub></b> |            |            |            | N                          | 5.1418990  | -0.1307740 | 0.8442260  |
| H = -1079.102067 a.u.       |            |            |            | H                          | 5.5906600  | 0.7009640  | 1.1871810  |
| G = -1079.170935 a.u.       |            |            |            | H                          | 5.6487660  | -0.9917440 | 0.7329720  |
| C                           | -3.2083610 | -0.0498070 | 0.8185600  | N                          | 1.3685850  | 2.3393700  | 0.4534030  |
| O                           | -3.0720470 | 1.3588440  | 0.7185690  | H                          | 1.9581100  | 3.0713320  | 0.8209130  |
| C                           | -0.2824320 | 0.1770850  | -0.4443630 | H                          | 0.4435590  | 2.6057960  | 0.0974360  |
| C                           | -1.1604670 | -1.0803310 | -0.4714450 | N                          | 1.5500630  | -2.3486010 | -0.7805420 |
| C                           | -2.6621580 | -0.7508900 | -0.4453190 | H                          | 2.1932940  | -3.1247320 | -0.8075720 |
| H                           | -4.2746900 | -0.2998340 | 0.8790530  | H                          | 0.6420980  | -2.3979600 | -1.2463280 |
| H                           | -0.9375810 | -1.7557230 | 0.3586900  | O                          | -1.1374100 | 3.1848860  | -0.5226880 |
| H                           | -3.1696810 | -1.7147640 | -0.5333690 | H                          | -1.7739840 | 2.8176520  | 0.1019950  |
| O                           | -3.0393650 | 0.0308650  | -1.5695340 | H                          | -1.0195110 | 2.4800830  | -1.1944640 |
| H                           | -2.2510990 | 0.5210180  | -1.8690760 | <b>INT12<sub>H2O</sub></b> |            |            |            |
| O                           | -0.9158710 | -1.8050020 | -1.6741330 | H = -1079.167379 a.u.      |            |            |            |
| H                           | -0.9163710 | -1.1431150 | -2.3824040 | G = -1079.239471 a.u.      |            |            |            |
| C                           | -2.5581280 | -0.4810750 | 2.1195120  | C                          | -3.0363380 | -0.0418450 | 0.9725210  |
| H                           | -3.0715690 | 0.0151480  | 2.9489490  | O                          | -2.9575050 | 1.3505500  | 0.6886180  |
| H                           | -1.5049140 | -0.1741730 | 2.1372320  | C                          | -0.2642930 | 0.1370710  | -0.5450170 |
| O                           | -2.6839730 | -1.8918170 | 2.1926500  | C                          | -1.1141720 | -1.1433450 | -0.4437370 |
| H                           | -2.4152730 | -2.1901560 | 3.0636170  | C                          | -2.6147760 | -0.8938690 | -0.2380380 |
| O                           | -0.4091120 | 0.8488390  | -1.6926600 | H                          | -4.0782960 | -0.2999460 | 1.1908690  |
| H                           | -3.4956980 | 1.5863110  | -0.1198090 | H                          | -0.7494330 | -1.7535630 | 0.3863640  |
| H                           | -0.6201830 | 0.7979790  | 0.3951390  | H                          | -3.0665640 | -1.8803030 | -0.1119810 |
| C                           | 3.8506900  | -0.0761000 | 0.4766240  | O                          | -3.1921770 | -0.3505920 | -1.4215640 |

H -2.6253240 0.3766070 -1.7148990  
 O -0.9892700 -1.9232530 -1.6299070  
 H -1.7041390 -1.6672850 -2.2251300  
 C -2.2203190 -0.3057170 2.2264490  
 H -2.6497560 0.2712400 3.0514440  
 H -1.1814690 0.0178330 2.0862340  
 O -2.2997040 -1.7006740 2.4609920  
 H -1.8208020 -1.9169830 3.2638120  
 O -0.5801760 0.7862270 -1.8047010  
 H -3.6957820 1.5643960 0.1090160  
 H -0.6550700 0.8380010 0.1953940  
 C 3.8197610 -0.0026780 0.4276690  
 N 3.1878330 1.1629420 0.5432950  
 C 1.8978160 1.1674740 0.1872780  
 C 1.2152970 0.0169180 -0.2882640  
 C 2.0273910 -1.1380170 -0.3958800  
 N 3.3211700 -1.1427810 -0.0400750  
 H -0.0233970 0.3935500 -2.4854420  
 N 5.1192170 -0.0341460 0.8496090  
 H 5.5756800 0.8550070 0.9668050  
 H 5.6721640 -0.8181830 0.5460560  
 N 1.2677670 2.3588360 0.3665860  
 H 1.8792330 3.1101240 0.6454210  
 H 0.4255150 2.6288250 -0.1272610  
 N 1.5781050 -2.3503460 -0.8204300  
 H 2.3039630 -3.0413660 -0.9241240  
 H 0.7469140 -2.4382540 -1.3867080  
 O -1.3404470 3.2850960 -0.7506740  
 H -1.8348430 2.8146980 -0.0681650  
 H -1.2252080 2.6292750 -1.4505960

**TS12\_13<sub>H2O</sub>**

H = -1079.116628 a.u.

G = -1079.186234 a.u.

C -3.0774420 0.2631230 0.9086330  
 O -3.2628920 1.3577930 0.0506170  
 C -0.1810540 -0.0922330 -0.2399230  
 C -1.0827060 -1.2892930 -0.0114540  
 C -2.6019900 -1.0098660 0.1604270  
 H -4.0823670 0.0060020 1.2562830  
 H -0.7350500 -1.7407130 0.9256340  
 H -2.9645480 -1.8713700 0.7254410  
 O -3.2501770 -1.0618740 -1.0903810  
 H -3.2938440 -0.1548750 -1.4245060  
 O -0.9547290 -2.2689950 -1.0220660  
 H -1.5467740 -1.9728810 -1.7326510  
 C -2.2523190 0.6278470 2.1399490  
 H -2.8419080 1.3149730 2.7548080  
 H -1.3287830 1.1487420 1.8593120  
 O -1.9639680 -0.5768410 2.8367860  
 H -1.5936180 -0.3655000 3.6958920  
 O -0.9510120 0.3026830 -2.1746120  
 H -2.4392670 1.8007520 -0.2807370  
 H -0.6318090 0.8561450 0.0102030  
 C 3.8292740 0.1365970 0.3745630  
 N 3.1779480 1.2944410 0.2424670  
 C 1.8866730 1.2187430 -0.0872410  
 C 1.2036660 -0.0674190 -0.2250900  
 C 2.0960440 -1.2167020 -0.2033900  
 N 3.3776970 -1.1027580 0.1254370  
 N 5.1091200 0.2186000 0.7823950



|                            |            |            |            |                             |            |            |            |
|----------------------------|------------|------------|------------|-----------------------------|------------|------------|------------|
| H                          | 5.5210670  | 1.1249260  | 0.9227790  | O                           | -3.3336270 | -1.5057710 | 1.9858600  |
| H                          | 5.6605640  | -0.6201020 | 0.8373650  | H                           | -3.3097210 | -1.7146150 | 2.9218480  |
| N                          | 1.2419730  | 2.3652140  | -0.2594640 | O                           | -1.1527200 | 2.1354890  | -2.2081440 |
| H                          | 1.8049370  | 3.1881080  | -0.1009540 | H                           | -2.1321620 | 1.8327990  | 0.7430770  |
| H                          | 0.2647560  | 2.4848580  | -0.6458720 | H                           | -0.5534850 | 0.7709110  | -0.2673580 |
| N                          | 1.6650280  | -2.4473180 | -0.4779950 | C                           | 3.8950350  | 0.0485100  | 0.3251950  |
| H                          | 2.3523850  | -3.1824230 | -0.4189540 | N                           | 3.2719570  | 1.1841680  | 0.0897120  |
| H                          | 0.7368570  | -2.6224560 | -0.8613240 | C                           | 1.9396580  | 1.1317800  | -0.1674910 |
| H                          | -0.2079550 | 0.2476870  | -2.7826780 | C                           | 1.2382150  | -0.2002130 | -0.1621040 |
| O                          | -1.2298830 | 2.5008440  | -1.2162080 | C                           | 2.1400030  | -1.3686880 | -0.0151820 |
| H                          | -1.1093150 | 1.3481580  | -1.9208600 | N                           | 3.4095450  | -1.2281870 | 0.2689640  |
| H                          | -1.5872840 | 3.2590700  | -1.6809820 | N                           | 5.1995570  | 0.1154640  | 0.6474410  |
| <b>INT13<sub>H2O</sub></b> |            |            |            | H                           | 5.6547150  | 1.0121640  | 0.6530710  |
| H = -1079.138669 a.u.      |            |            |            | H                           | 5.7195890  | -0.7362240 | 0.7678100  |
| G = -1079.213400 a.u.      |            |            |            | N                           | 1.2489570  | 2.2044530  | -0.4032710 |
| C                          | -3.1791740 | 0.1942670  | 0.3318560  | H                           | 1.8906510  | 2.9958640  | -0.3808740 |
| O                          | -2.7762190 | 1.5261010  | 0.0790220  | H                           | 0.0138720  | 2.4359820  | 0.9415190  |
| C                          | -0.1046150 | -0.2129060 | -0.2213070 | N                           | 1.6603350  | -2.6114340 | -0.1192730 |
| C                          | -1.1129700 | -1.3398350 | -0.2545110 | H                           | 2.3446830  | -3.3485470 | -0.0370680 |
| C                          | -2.5214040 | -0.8321670 | -0.6110560 | H                           | 0.7821370  | -2.7881590 | -0.6035550 |
| H                          | -4.2505410 | 0.1477770  | 0.1161110  | H                           | -0.2993630 | 2.2520180  | -1.7558450 |
| H                          | -1.1376370 | -1.8522390 | 0.7134490  | O                           | -0.6997630 | 2.4028510  | 1.6183160  |
| H                          | -3.1552500 | -1.7217520 | -0.5888030 | H                           | -1.8076090 | 2.4796270  | -1.5890960 |
| O                          | -2.5077710 | -0.3921590 | -1.9513880 | H                           | -0.6429420 | 3.2191800  | 2.1191370  |
| H                          | -2.0663970 | 0.4759610  | -2.0242090 | <b>INT7'<sub>2H2O</sub></b> |            |            |            |
| O                          | -0.7884220 | -2.3269760 | -1.2293550 | H = -1155.568857 a.u.       |            |            |            |
| H                          | -1.0931300 | -1.9714320 | -2.0777980 | G = -1155.645127 a.u.       |            |            |            |
| C                          | -2.9556810 | -0.1520210 | 1.7979530  | C                           | 2.8588020  | -0.9289090 | -0.9209180 |
| H                          | -3.5581730 | 0.5237740  | 2.4144950  | O                           | 2.3475820  | -0.1939000 | -2.0202310 |
| H                          | -1.8979190 | 0.0070180  | 2.0544850  | C                           | 0.1733610  | 0.4577130  | 0.0041870  |

|   |            |            |            |                              |            |            |            |
|---|------------|------------|------------|------------------------------|------------|------------|------------|
| C | 1.1583070  | -0.2774710 | 0.9345140  | N                            | -1.2859890 | -1.1065470 | 2.4540090  |
| C | 2.6051580  | -0.2168060 | 0.4195780  | H                            | -1.6024540 | -1.9777060 | 2.8530050  |
| H | 3.9484090  | -1.0197380 | -1.0147430 | H                            | -0.4576710 | -0.6222940 | 2.8093460  |
| H | 0.8834800  | -1.3348500 | 0.9961760  | O                            | 0.6885830  | 2.9327830  | 2.0297250  |
| H | 3.2126160  | -0.7199660 | 1.1762180  | H                            | 0.6692740  | 2.6769260  | 1.0710070  |
| O | 3.0678940  | 1.1157690  | 0.3164850  | H                            | 1.2788890  | 3.6836090  | 2.1158210  |
| H | 2.2980830  | 1.6285710  | -0.0031130 | O                            | 0.1501840  | 1.5684300  | -3.0083890 |
| O | 1.0927720  | 0.2060280  | 2.2698530  | H                            | 0.6136710  | 0.7628510  | -3.2530850 |
| H | 1.2203890  | 1.1733700  | 2.2930650  | H                            | 0.4246530  | 1.7174950  | -2.0821700 |
| C | 2.2484400  | -2.3152830 | -1.0250730 | <b>TS7'_12<sub>H2O</sub></b> |            |            |            |
| H | 2.6116510  | -2.7904020 | -1.9419810 | H = -1155.542271 a.u.        |            |            |            |
| H | 1.1562460  | -2.2300880 | -1.0971810 | G = -1155.616484 a.u.        |            |            |            |
| O | 2.6349510  | -3.0428290 | 0.1293120  | C                            | 3.0840520  | -0.7072120 | -0.8959920 |
| H | 2.4072680  | -3.9666190 | 0.0108020  | O                            | 2.9987540  | 0.5747760  | -1.4984410 |
| O | 0.5694720  | 1.7357580  | -0.2984920 | C                            | 0.3675200  | 0.4200170  | 0.3190980  |
| H | 2.7179200  | 0.6946660  | -1.9598750 | C                            | 1.1765460  | -0.7488270 | 0.9061820  |
| H | 0.0572770  | -0.1570970 | -0.9052700 | C                            | 2.6787190  | -0.6540620 | 0.5927370  |
| C | -3.3440220 | -0.9722750 | -0.3493660 | H                            | 4.1270010  | -1.0455470 | -0.9226170 |
| N | -3.1799350 | 0.2338260  | -0.9135990 | H                            | 0.8140510  | -1.7146720 | 0.5463120  |
| C | -2.2216170 | 0.9906970  | -0.4071780 | H                            | 3.1360620  | -1.5144070 | 1.0875840  |
| C | -1.2954770 | 0.5351160  | 0.6783180  | O                            | 3.2510160  | 0.5116510  | 1.1651310  |
| C | -1.8038270 | -0.7321930 | 1.2945970  | H                            | 2.5552070  | 1.1963460  | 1.1608760  |
| N | -2.7387870 | -1.4811140 | 0.7460880  | O                            | 1.0403520  | -0.7685540 | 2.3266450  |
| H | -1.1929640 | 1.3007330  | 1.4523500  | H                            | 1.3415470  | 0.0942500  | 2.6404120  |
| N | -4.2461850 | -1.7691220 | -0.9284010 | C                            | 2.2630300  | -1.6619430 | -1.7431620 |
| H | -4.7412530 | -1.4391890 | -1.7403910 | H                            | 2.6898630  | -1.6943370 | -2.7505670 |
| H | -4.4303560 | -2.6759160 | -0.5331300 | H                            | 1.2285380  | -1.3045490 | -1.8224300 |
| N | -2.0101550 | 2.1934090  | -0.9083970 | O                            | 2.3221950  | -2.9283510 | -1.1076710 |
| H | -2.4520300 | 2.4015770  | -1.7941290 | H                            | 1.9184920  | -3.5877540 | -1.6752020 |
| H | -1.0819970 | 2.5810460  | -0.7186680 | O                            | 0.7843920  | 1.5971090  | 0.9666220  |

|                                        |            |            |            |   |            |            |            |
|----------------------------------------|------------|------------|------------|---|------------|------------|------------|
| H                                      | 3.5492930  | 1.1497300  | -0.9515970 | C | -0.8497300 | -1.2348980 | 0.6858050  |
| H                                      | 0.6454570  | 0.4809360  | -0.7409480 | C | -2.3296840 | -0.9150010 | 0.9397660  |
| C                                      | -3.6008500 | -0.6072640 | -0.6840530 | H | -3.6286440 | 0.4787190  | 1.8840170  |
| N                                      | -3.0572270 | 0.4430370  | -1.3054890 | H | -0.2915570 | -1.0324000 | 1.6022800  |
| C                                      | -1.8676280 | 0.8419090  | -0.8606390 | H | -2.6015590 | -1.5385790 | 1.7955680  |
| C                                      | -1.2049150 | 0.2650920  | 0.3220890  | O | -3.1061350 | -1.3666330 | -0.1529520 |
| C                                      | -1.9294840 | -0.9131580 | 0.8261140  | H | -3.2024950 | -0.6318170 | -0.7785420 |
| N                                      | -3.1025610 | -1.3072960 | 0.3450080  | O | -0.7672960 | -2.6361900 | 0.4628410  |
| H                                      | -1.4901900 | 1.1267950  | 1.2175420  | H | -1.4777570 | -2.8420490 | -0.1608530 |
| N                                      | -4.7920140 | -1.0198240 | -1.1510840 | C | -1.6538800 | 1.2334960  | 2.1564180  |
| H                                      | -5.2279190 | -0.5097010 | -1.8998630 | H | -2.0263500 | 2.2275980  | 2.4272110  |
| H                                      | -5.2604450 | -1.7845310 | -0.6968260 | H | -0.7213310 | 1.3630660  | 1.5881770  |
| N                                      | -1.3090870 | 1.8503880  | -1.5176100 | O | -1.4474310 | 0.4268610  | 3.3042590  |
| H                                      | -1.8485900 | 2.2361270  | -2.2779200 | H | -0.7810750 | 0.8357350  | 3.8605390  |
| H                                      | -0.4039340 | 2.2787380  | -1.3074780 | O | -0.3805190 | -1.1597970 | -1.7286760 |
| N                                      | -1.4845610 | -1.5916060 | 1.8825390  | H | -2.2791230 | 1.7533430  | -0.2355130 |
| H                                      | -2.0754940 | -2.3350000 | 2.2204570  | H | -0.7221790 | 0.4764440  | -0.6264560 |
| H                                      | -0.6111710 | -1.3531190 | 2.3493450  | C | 3.8803220  | 0.4035930  | 0.1386880  |
| O                                      | -1.2416030 | 2.1904270  | 2.0511940  | N | 3.0617050  | 1.4492220  | 0.0460400  |
| H                                      | -0.1825680 | 2.0409910  | 1.6582240  | C | 1.7712230  | 1.1755530  | -0.1804210 |
| H                                      | -1.3076030 | 1.9819660  | 2.9866750  | C | 1.2768870  | -0.1375880 | -0.2615760 |
| O                                      | 1.3065840  | 2.9777920  | -1.3003780 | C | 2.2597280  | -1.1421170 | -0.1770580 |
| H                                      | 1.8273190  | 2.3020120  | -1.7489740 | N | 3.5555100  | -0.8835820 | 0.0066500  |
| H                                      | 1.2977740  | 2.6867020  | -0.3656090 | N | 5.1903380  | 0.6740250  | 0.4176980  |
| <b>INT12<sub>2</sub>H<sub>2</sub>O</b> |            |            |            | H | 5.4950540  | 1.6226600  | 0.2769130  |
| H = -1155.582174 a.u.                  |            |            |            | H | 5.8488870  | -0.0676830 | 0.2474890  |
| G = -1155.658570 a.u.                  |            |            |            | N | 0.9537020  | 2.2779310  | -0.2811300 |
| C                                      | -2.7043200 | 0.5385190  | 1.3036010  | H | 1.4876850  | 3.1332020  | -0.3423570 |
| O                                      | -3.0365380 | 1.3033610  | 0.1623410  | H | 0.1679820  | 2.2428990  | -0.9216250 |
| C                                      | -0.1793180 | -0.4589790 | -0.4926280 | N | 1.9378510  | -2.4697490 | -0.3608460 |

H 2.7166940 -3.0827870 -0.1655740  
H 1.0405660 -2.7903260 -0.0022420  
H 0.3197610 -1.8160230 -1.8328880  
O -1.5188870 2.3831280 -1.9378610  
H -1.7841240 -0.5940690 -2.6164170  
H -1.9071430 3.1979580 -2.2638160  
O -2.5394580 0.0060720 -2.7718130  
H -1.9566930 1.6487040 -2.4121510  
H -3.0476080 -0.3494090 -3.5033330

**TS12\_13<sub>2H2O</sub>**

H = -1155.534069 a.u.

G = -1155.607777 a.u.

C -2.8623840 -0.6149730 1.1584630  
O -3.2070120 0.7402390 1.0749510  
C -0.0959280 -0.0479060 -0.3566360  
C -0.9109330 -1.3332030 -0.4937050  
C -2.4180400 -1.2052980 -0.2097880  
H -3.7881660 -1.1364160 1.4174690  
H -0.4932990 -2.0426690 0.2287280  
H -2.7681900 -2.2408390 -0.2453360  
O -3.0398350 -0.5250550 -1.2736620  
H -3.1969740 0.3962160 -1.0090600  
O -0.7732340 -1.9287490 -1.7704550  
H -1.2141840 -1.3289870 -2.3900180  
C -1.8700830 -0.8712110 2.2861150  
H -2.3129270 -0.5061420 3.2179130  
H -0.9365190 -0.3142480 2.1171530  
O -1.6232380 -2.2690830 2.3379140  
H -1.1412200 -2.4765060 3.1408650  
O -0.5360990 0.7210810 -2.1171200

H -2.4426550 1.3688380 1.0652090  
H -0.6331150 0.7539060 0.1386180  
C 3.9377740 0.1473020 0.3636800  
N 3.2257400 1.2418680 0.6379950  
C 1.9193460 1.1954000 0.3591790  
C 1.2975110 0.0054500 -0.2031500  
C 2.2322950 -1.0485360 -0.5438570  
N 3.5229290 -0.9806040 -0.2274360  
N 5.2397620 0.1829950 0.7113530  
H 5.6193330 1.0307530 1.0955710  
H 5.8339360 -0.5885800 0.4628080  
N 1.2271360 2.3014130 0.6203320  
H 1.7757800 3.0295260 1.0542460  
H 0.1811970 2.4277670 0.6133540  
N 1.8529830 -2.1608280 -1.1807050  
H 2.5886330 -2.8197570 -1.3824260  
H 0.9430960 -2.2474900 -1.6303530  
H 0.2658460 1.2024910 -2.3483870  
O -1.4156680 2.6470400 0.7054770  
H -1.2983660 1.4171230 -1.9862470  
H -1.6951460 3.3800490 1.2578720  
O -2.3366990 2.3116940 -1.5051090  
H -1.9903420 2.6182830 -0.5211170  
H -2.6996410 3.0432800 -2.0054060

**INT13<sub>2H2O</sub>**

H = -1155.556250 a.u.

G = -1155.636328 a.u.

C -2.7070370 -0.9900280 1.1429600  
O -2.8879960 0.3617520 1.5097460  
C -0.0458040 -0.0240080 -0.2479060

|   |            |            |            |                            |            |            |            |
|---|------------|------------|------------|----------------------------|------------|------------|------------|
| C | -0.8732600 | -1.1963380 | -0.7338430 | H                          | 2.5286400  | -2.5312530 | -1.9060440 |
| C | -2.3646740 | -1.1592110 | -0.3564810 | H                          | 0.9246550  | -1.8116470 | -2.0540230 |
| H | -3.6881750 | -1.4497940 | 1.2846430  | H                          | -0.2398210 | 1.9352420  | -2.5297170 |
| H | -0.4526280 | -2.1154040 | -0.3125820 | O                          | -1.1783890 | 2.5633700  | 1.5410650  |
| H | -2.7383770 | -2.1387700 | -0.6664170 | H                          | -1.7173180 | 1.8231390  | -2.1346000 |
| O | -3.0510060 | -0.2037740 | -1.1231520 | H                          | -1.1671630 | 3.0837740  | 2.3472350  |
| H | -3.0897570 | 0.6333910  | -0.6363930 | O                          | -2.7026510 | 2.6185190  | -0.7252950 |
| O | -0.7715840 | -1.3246380 | -2.1449360 | H                          | -2.2873690 | 2.7785350  | 0.1435030  |
| H | -1.0516350 | -0.4699980 | -2.5259950 | H                          | -3.5135740 | 3.1301460  | -0.7557860 |
| C | -1.7222170 | -1.6771380 | 2.0776000  | <b>INT7<sub>3H2O</sub></b> |            |            |            |
| H | -2.1002390 | -1.5942550 | 3.1016940  | H = -1231.982932 a.u.      |            |            |            |
| H | -0.7457100 | -1.1713030 | 2.0310670  | G = -1232.064626 a.u.      |            |            |            |
| O | -1.6121830 | -3.0306280 | 1.6692300  | C                          | -2.9033950 | -1.3215960 | -0.1140990 |
| H | -1.0896680 | -3.5149800 | 2.3114980  | O                          | -2.5366640 | -1.5511610 | 1.2367250  |
| O | -1.0295360 | 1.4092720  | -2.6807780 | C                          | -0.2063150 | 0.2114220  | 0.3839310  |
| H | -2.0614920 | 0.8522450  | 1.6320480  | C                          | -1.0823740 | 0.3856500  | -0.8670400 |
| H | -0.5942650 | 0.8290000  | 0.1392300  | C                          | -2.5642050 | 0.1095960  | -0.5687840 |
| C | 3.9259620  | 0.0832780  | 0.4048400  | H                          | -3.9901500 | -1.4295120 | -0.2215330 |
| N | 3.2820000  | 1.1847600  | 0.7265250  | H                          | -0.7637770 | -0.3119220 | -1.6475690 |
| C | 1.9651270  | 1.2734130  | 0.3889420  | H                          | -3.1010050 | 0.2923410  | -1.5031450 |
| C | 1.2956390  | 0.0811040  | -0.2297190 | O                          | -3.0653360 | 1.0222590  | 0.3930610  |
| C | 2.2429970  | -0.9479170 | -0.7280640 | H                          | -2.3380260 | 1.1477010  | 1.0360180  |
| N | 3.4995730  | -0.9657910 | -0.3586570 | O                          | -0.9341950 | 1.6796420  | -1.4192690 |
| N | 5.1953640  | -0.0423270 | 0.8404530  | H                          | -1.3115450 | 2.3296700  | -0.8090940 |
| H | 5.6213260  | 0.7340350  | 1.3172740  | C                          | -2.2308200 | -2.4124760 | -0.9280410 |
| H | 5.7491000  | -0.8122410 | 0.5069290  | H                          | -2.6251340 | -3.3824950 | -0.6078650 |
| N | 1.2846790  | 2.3473820  | 0.6229960  | H                          | -1.1501680 | -2.4038290 | -0.7353260 |
| H | 1.9163970  | 3.0239220  | 1.0501030  | O                          | -2.5129000 | -2.1577680 | -2.2939460 |
| H | -0.2338820 | 2.5436950  | 1.1716340  | H                          | -2.1915850 | -2.8894930 | -2.8237040 |
| N | 1.8237130  | -1.8907950 | -1.5730770 | O                          | -0.6138920 | 0.9909870  | 1.4392390  |

|                                |            |            |            |   |            |            |            |
|--------------------------------|------------|------------|------------|---|------------|------------|------------|
| H                              | -2.9504660 | -0.8544110 | 1.7598600  | C | -3.1958430 | -1.1625130 | 0.0814010  |
| H                              | -0.2177540 | -0.8589430 | 0.6501160  | O | -3.1205930 | -0.7267480 | 1.4292690  |
| C                              | 2.8882590  | -1.6440860 | -0.2428290 | C | -0.4183650 | 0.3744100  | 0.1214070  |
| N                              | 2.8015230  | -1.1776720 | 1.0188670  | C | -1.2122920 | 0.0533150  | -1.1635950 |
| C                              | 2.0917110  | -0.0775780 | 1.1796570  | C | -2.7219050 | -0.0688660 | -0.8964720 |
| C                              | 1.3362670  | 0.5726060  | 0.0688350  | H | -4.2441700 | -1.3663860 | -0.1684300 |
| C                              | 1.8413640  | 0.0893760  | -1.2484510 | H | -0.8617720 | -0.8673080 | -1.6374250 |
| N                              | 2.4887070  | -1.0568030 | -1.3867840 | H | -3.1803390 | -0.2820880 | -1.8655860 |
| H                              | 1.3951460  | 1.6615490  | 0.1062710  | O | -3.2316280 | 1.1848730  | -0.4616890 |
| N                              | 3.4871000  | -2.8321140 | -0.3768940 | H | -2.5369420 | 1.5678110  | 0.1194330  |
| H                              | 3.8394890  | -3.2967700 | 0.4432900  | O | -1.0742460 | 1.0979910  | -2.1334760 |
| H                              | 3.6268960  | -3.2131290 | -1.2975340 | H | -1.6926270 | 1.7947260  | -1.8783340 |
| N                              | 1.9462240  | 0.4420780  | 2.3890510  | C | -2.4333390 | -2.4711520 | -0.0205050 |
| H                              | 2.1785240  | -0.1573220 | 3.1705750  | H | -2.9086750 | -3.2059790 | 0.6369610  |
| H                              | 1.1440240  | 1.0599600  | 2.5009110  | H | -1.3964940 | -2.3363090 | 0.3123080  |
| N                              | 1.6078150  | 0.8341610  | -2.3084600 | O | -2.4900150 | -2.8697690 | -1.3805530 |
| H                              | 1.9269180  | 0.5062540  | -3.2077070 | H | -2.1328420 | -3.7557480 | -1.4660940 |
| H                              | 1.1169310  | 1.7241620  | -2.2121600 | O | -0.8074840 | 1.6295950  | 0.5918930  |
| O                              | -0.5163310 | 3.4682200  | 0.7733590  | H | -3.6404000 | 0.0857010  | 1.4688320  |
| H                              | -0.5569260 | 2.5241900  | 1.1394150  | H | -0.7622150 | -0.3774520 | 0.8430690  |
| H                              | -0.9964070 | 4.0443180  | 1.3701650  | C | 3.4618930  | -1.2986910 | -0.0310640 |
| O                              | -0.5365710 | -0.9624110 | 3.3749580  | N | 2.8584530  | -1.2493640 | 1.1575950  |
| H                              | -0.9868790 | -1.6921740 | 2.9402540  | C | 1.7001420  | -0.5884780 | 1.2080550  |
| H                              | -0.6846630 | -0.2088530 | 2.7695460  | C | 1.1336770  | 0.1387930  | 0.0659540  |
| O                              | 1.3113220  | 3.5646500  | -1.2907800 | C | 1.8921600  | -0.1046750 | -1.1616450 |
| H                              | 0.6293860  | 3.7092650  | -0.6088380 | N | 3.0496970  | -0.7599980 | -1.1882270 |
| H                              | 1.9011960  | 4.3190510  | -1.2482660 | H | 1.7142410  | 1.3189460  | 0.3253120  |
| <b>TS7' _12<sub>3H2O</sub></b> |            |            |            | N | 4.6295260  | -1.9669020 | -0.0787460 |
| H = -1231.954603 a.u.          |            |            |            | H | 4.9811010  | -2.3996450 | 0.7576600  |
| G = -1232.033360 a.u.          |            |            |            | H | 5.1159700  | -2.0467470 | -0.9545260 |

|                            |            |            |            |                              |            |            |            |
|----------------------------|------------|------------|------------|------------------------------|------------|------------|------------|
| N                          | 1.0997470  | -0.5639610 | 2.3931800  | C                            | 4.2388000  | -1.2752360 | -0.7009580 |
| H                          | 1.6065040  | -1.0038820 | 3.1466840  | H                            | 4.4146220  | -2.1287570 | -1.3590650 |
| H                          | 0.2702770  | -0.0050160 | 2.6305210  | H                            | 4.7613200  | -1.4715410 | 0.2517440  |
| N                          | 1.5245550  | 0.4505360  | -2.3186610 | O                            | 4.7607660  | -0.1377750 | -1.3407000 |
| H                          | 2.1203860  | 0.2684870  | -3.1110750 | H                            | 4.4396970  | 0.6344520  | -0.8580450 |
| H                          | 0.6314550  | 0.9241760  | -2.4351280 | O                            | 0.5369360  | 0.8633340  | -1.1209330 |
| O                          | 0.2620000  | 3.5721230  | -0.3761810 | H                            | 2.8284540  | -2.7763100 | 0.7193240  |
| H                          | -0.2926710 | 2.6977250  | 0.0073240  | H                            | -0.1426600 | -1.0041890 | -0.6061560 |
| H                          | 0.1535810  | 3.6323680  | -1.3272780 | C                            | -3.5196240 | -1.0124500 | -0.5843620 |
| O                          | -1.2480360 | 0.8127750  | 3.1009470  | N                            | -3.2236100 | 0.0104410  | -1.3602850 |
| H                          | -1.9034460 | 0.1427410  | 2.8766330  | C                            | -2.2728340 | 0.8688920  | -0.9068430 |
| H                          | -1.1788760 | 1.3554430  | 2.2827640  | C                            | -1.4362470 | 0.5033420  | 0.2984650  |
| O                          | 2.2383310  | 2.4919130  | 0.5206450  | C                            | -2.1383110 | -0.5168510 | 1.1482110  |
| H                          | 1.4737860  | 3.1057900  | 0.0864770  | N                            | -3.0930110 | -1.2768290 | 0.6992580  |
| H                          | 3.0669200  | 2.6055880  | 0.0458610  | H                            | -1.2768260 | 1.4030410  | 0.8911630  |
| <b>INT14<sub>H2O</sub></b> |            |            |            | N                            | -4.3915910 | -1.9199830 | -1.0536040 |
| H = -1079.151571 a.u.      |            |            |            | H                            | -4.7979310 | -1.7822150 | -1.9634780 |
| G = -1079.223254 a.u.      |            |            |            | H                            | -4.6859410 | -2.6736640 | -0.4570520 |
| C                          | 2.7387910  | -1.1883480 | -0.4195830 | N                            | -1.9546840 | 1.9807330  | -1.4823360 |
| O                          | 2.2493700  | -2.4484150 | 0.0237270  | H                            | -2.5274740 | 2.1146090  | -2.3149700 |
| C                          | -0.0309950 | -0.0062120 | -0.1612780 | H                            | -0.7601130 | 3.1278810  | -0.2783040 |
| C                          | 0.9321650  | -0.1137620 | 1.0391430  | N                            | -1.7357420 | -0.6197010 | 2.4167560  |
| C                          | 2.4107970  | -0.1105440 | 0.6222840  | H                            | -2.1845710 | -1.2946750 | 3.0160630  |
| H                          | 2.2170180  | -0.9651010 | -1.3538820 | H                            | -0.9861530 | -0.0267460 | 2.7566800  |
| H                          | 0.7353220  | -1.0647020 | 1.5364410  | O                            | -0.1563310 | 3.3079090  | 0.4662700  |
| H                          | 2.9880650  | -0.3217280 | 1.5315750  | H                            | -0.1638770 | 1.4024080  | -1.5338910 |
| O                          | 2.8334720  | 1.1755580  | 0.1975830  | H                            | -0.0120090 | 4.2558770  | 0.4825170  |
| H                          | 2.1927520  | 1.4636220  | -0.4720790 | <b>TS14_12<sub>H2O</sub></b> |            |            |            |
| O                          | 0.7029010  | 0.8928370  | 2.0081410  | H = -1079.109118 a.u.        |            |            |            |
| H                          | 0.7986010  | 1.7645530  | 1.5896870  | G = -1079.178140 a.u.        |            |            |            |

|   |            |            |            |                                        |            |            |            |
|---|------------|------------|------------|----------------------------------------|------------|------------|------------|
| C | 2.8298910  | -1.0304860 | -0.5500570 | N                                      | -1.9262450 | 1.7818900  | -1.6721790 |
| O | 2.2460840  | -2.3137960 | -0.3837170 | H                                      | -2.5554940 | 1.9513700  | -2.4488790 |
| C | 0.1025070  | 0.1842210  | -0.1673590 | H                                      | -1.6353140 | 2.6167530  | -0.8022260 |
| C | 1.0053510  | -0.1353580 | 1.0251350  | N                                      | -1.5781330 | -0.6483900 | 2.3629770  |
| C | 2.4984500  | -0.1507970 | 0.6597950  | H                                      | -2.0837060 | -1.2688230 | 2.9751210  |
| H | 2.3771090  | -0.5974420 | -1.4465720 | H                                      | -0.8741180 | -0.0170420 | 2.7242480  |
| H | 0.7354390  | -1.1265800 | 1.3896080  | O                                      | -1.4046020 | 3.0065050  | 0.3821860  |
| H | 3.0345130  | -0.5403960 | 1.5344170  | H                                      | 0.0506040  | 1.6074430  | -1.5155980 |
| O | 2.9834670  | 1.1775510  | 0.4882650  | H                                      | -0.5049930 | 3.3321870  | 0.4733350  |
| H | 2.4430370  | 1.5701120  | -0.2162260 | <b>INT14<sub>2</sub>H<sub>2</sub>O</b> |            |            |            |
| O | 0.8118050  | 0.7702240  | 2.0998060  | H = -1155.568302 a.u.                  |            |            |            |
| H | 1.3901030  | 1.5291630  | 1.9563060  | G = -1155.645463 a.u.                  |            |            |            |
| C | 4.3369860  | -1.1565890 | -0.7755320 | C                                      | 2.9271940  | -0.8549020 | 0.1153470  |
| H | 4.5010160  | -1.8793270 | -1.5769790 | O                                      | 2.4354030  | -1.7739150 | 1.0787120  |
| H | 4.7964370  | -1.5617570 | 0.1424290  | C                                      | 0.1062980  | 0.0102890  | -0.3116920 |
| O | 4.9538530  | 0.0450620  | -1.1652840 | C                                      | 0.9601310  | 0.6650900  | 0.7759090  |
| H | 4.6919730  | 0.7260790  | -0.5346240 | C                                      | 2.4653970  | 0.5629930  | 0.4648910  |
| O | 0.6744860  | 1.3071500  | -0.8346410 | H                                      | 2.4908540  | -1.1490980 | -0.8445560 |
| H | 2.7663840  | -2.8134490 | 0.2536630  | H                                      | 0.7593200  | 0.1659020  | 1.7248940  |
| H | 0.1502970  | -0.6819420 | -0.8429150 | H                                      | 3.0038650  | 0.9028890  | 1.3581630  |
| C | -3.5383270 | -1.0840380 | -0.4888850 | O                                      | 2.8247160  | 1.4859420  | -0.5591820 |
| N | -3.2120810 | -0.1355080 | -1.3720410 | H                                      | 2.2572490  | 1.2912370  | -1.3228980 |
| C | -2.2158100 | 0.6680470  | -1.0030480 | O                                      | 0.6333580  | 2.0342540  | 0.9394460  |
| C | -1.3856880 | 0.4452420  | 0.2056320  | H                                      | 1.1292800  | 2.5236010  | 0.2695800  |
| C | -2.0335510 | -0.5048300 | 1.1117480  | C                                      | 4.4483440  | -0.9566840 | 0.0049100  |
| N | -3.0841190 | -1.2351990 | 0.7737050  | H                                      | 4.7093430  | -2.0074040 | -0.1351430 |
| H | -1.3654690 | 1.7391440  | 0.6135270  | H                                      | 4.8932160  | -0.6223110 | 0.9577160  |
| N | -4.4722520 | -1.9693810 | -0.8767840 | O                                      | 4.9833140  | -0.2460830 | -1.0836510 |
| H | -4.9129730 | -1.8510830 | -1.7730360 | H                                      | 4.6198690  | 0.6469870  | -1.0598170 |
| H | -4.8146260 | -2.6423250 | -0.2128360 | O                                      | 0.4800570  | 0.6037010  | -1.5442340 |



|                              |            |            |            |   |            |            |            |
|------------------------------|------------|------------|------------|---|------------|------------|------------|
| H                            | 2.9448910  | -1.6797470 | 1.8899200  | C | 1.1409820  | -0.5420820 | 0.9444200  |
| H                            | 0.3288060  | -1.0642340 | -0.3285330 | C | 2.6391690  | -0.3958580 | 0.6203990  |
| C                            | -2.2859360 | -2.3668070 | -0.0777510 | H | 2.5622530  | -0.3011230 | -1.5296270 |
| N                            | -2.3759920 | -1.7664960 | -1.2506390 | H | 0.9234690  | -1.5966170 | 1.1127410  |
| C                            | -2.1188200 | -0.4322940 | -1.2681430 | H | 3.1928690  | -0.9673260 | 1.3778170  |
| C                            | -1.4206180 | 0.1824440  | -0.0736790 | O | 3.0527190  | 0.9556690  | 0.7979600  |
| C                            | -1.8649090 | -0.5257080 | 1.1746160  | H | 2.4545210  | 1.4857030  | 0.2413420  |
| N                            | -2.1677700 | -1.7933190 | 1.1664630  | O | 0.8821910  | 0.1782400  | 2.1610080  |
| H                            | -1.6276530 | 1.2474280  | -0.0116470 | H | 1.6830100  | 0.6758960  | 2.3730250  |
| N                            | -2.3984650 | -3.7051900 | -0.0515620 | C | 4.5424360  | -0.9133030 | -0.9782690 |
| H                            | -2.5704390 | -4.1968240 | -0.9120540 | H | 4.7519210  | -1.4022360 | -1.9316260 |
| H                            | -2.4291070 | -4.1774320 | 0.8354360  | H | 5.0168380  | -1.5115110 | -0.1812640 |
| N                            | -2.3053240 | 0.3457620  | -2.2809540 | O | 5.0949350  | 0.3778430  | -1.0411000 |
| H                            | -2.6983600 | -0.1890340 | -3.0556090 | H | 4.7689020  | 0.8730760  | -0.2804600 |
| H                            | -2.5561220 | 2.1450340  | -1.7048160 | O | 0.6954380  | 1.3067980  | -0.4389950 |
| N                            | -1.9084020 | 0.1843400  | 2.3005720  | H | 3.0599570  | -2.8571680 | -0.4445810 |
| H                            | -2.2656320 | -0.2778190 | 3.1240720  | H | 0.4442750  | -0.6446370 | -1.0525420 |
| H                            | -1.9172930 | 1.2079850  | 2.2463670  | C | -3.7063590 | -1.0789270 | -0.5678230 |
| O                            | -1.9425410 | 2.9773110  | 1.6481180  | N | -3.2590600 | -0.1293760 | -1.3776300 |
| H                            | -0.2877240 | 0.6500210  | -2.1391900 | C | -2.0606540 | 0.4151760  | -1.0739250 |
| H                            | -0.9923630 | 2.9641100  | 1.4670660  | C | -1.2774840 | -0.0657200 | 0.0714210  |
| O                            | -2.6093830 | 2.9607040  | -1.1625600 | C | -1.9375260 | -1.0693500 | 0.8535050  |
| H                            | -2.3451620 | 3.1191490  | 0.7767050  | N | -3.1490790 | -1.5305810 | 0.5739130  |
| H                            | -3.0970450 | 3.6020520  | -1.6824690 | H | -1.3993860 | 1.1296570  | 1.0685410  |
| <b>TS14_12<sub>H2O</sub></b> |            |            |            | N | -4.8781690 | -1.6668790 | -0.9070310 |
| H = -1155.531049 a.u.        |            |            |            | H | -5.3982130 | -1.2916690 | -1.6807380 |
| G = -1155.604423 a.u.        |            |            |            | H | -5.3052990 | -2.3047230 | -0.2587850 |
| C                            | 3.0289860  | -0.9256540 | -0.7626100 | N | -1.5793800 | 1.4191030  | -1.8006970 |
| O                            | 2.5129250  | -2.2352500 | -0.9349080 | H | -2.1899190 | 1.5578190  | -2.6021100 |
| C                            | 0.2433700  | -0.0228600 | -0.1698860 | H | -1.4596300 | 2.7684400  | -0.9714200 |

N -1.3733630 -1.5941040 1.9821400  
H -2.0160960 -2.1438870 2.5326110  
H -0.6943380 -1.0460410 2.4917880  
O -1.2354630 2.0448810 1.6687940  
H 0.1484140 1.6078330 -1.1961560  
H -0.3197020 1.8925070 1.9559160  
O -1.3596100 3.5299430 -0.2732390  
H -1.2597750 2.7969840 0.9055820  
H -2.1133040 4.1183570 -0.3644920

### SINT6

H = -1002.735214 a.u.

G = -1002.806913 a.u.

C -3.3591380 -0.7318570 0.0129820  
O -3.6620270 -1.4860410 -1.1475770  
C -0.3939300 -0.9978300 -0.4155870  
C -1.0032850 0.3069020 0.0520450  
C -2.4649120 0.4856470 -0.3537600  
H -2.8570110 -1.3578320 0.7636490  
H 0.5032930 -1.3283570 0.1343270  
H -0.4129180 1.1108320 -0.4140260  
H -2.5163970 0.6119190 -1.4409690  
O -2.8439470 1.6849820 0.3026710  
H -3.7602350 1.8735270 0.0590580  
O -0.8642180 0.3601910 1.4613330  
H -1.4214130 1.0934810 1.7543950  
O -0.8372000 -1.6374780 -1.3354680  
H -2.8310410 -1.7393030 -1.5687520  
C -4.7025820 -0.3000240 0.5690760  
H -4.5804160 0.2204230 1.5185850  
H -5.3208870 -1.1884690 0.7268010

O -5.3374300 0.6090940 -0.3213380  
H -5.4237950 0.1570930 -1.1683490  
C 4.0647050 -0.6004460 -0.3331690  
N 3.4456720 -1.0117610 0.7771790  
C 2.5190600 -0.1810580 1.2681850  
C 2.2072230 1.0385890 0.6611640  
C 2.9043560 1.3328640 -0.5104520  
N 3.8357580 0.5223190 -1.0206770  
H 1.4687320 1.7065420 1.0827810  
N 5.0547440 -1.4090680 -0.8099190  
H 5.0936220 -2.3460900 -0.4460020  
H 5.3636410 -1.2441200 -1.7530180  
N 1.8774250 -0.5826270 2.4078810  
H 2.0486370 -1.5406090 2.6731820  
H 0.9363400 -0.2380880 2.5406960  
N 2.6284030 2.4664960 -1.2363680  
H 3.3264040 2.7047120 -1.9246320  
H 2.2190260 3.2441240 -0.7442700

### STS6\_8

H = -1002.718136 a.u.

G = -1002.783239 a.u.

C -2.8159950 -0.0572480 0.9220660  
O -2.5680880 -1.3509210 1.4432110  
C -0.0913710 -0.3377090 -0.0343360  
C -1.0852200 0.4086050 -0.9341480  
C -2.5157150 -0.0271480 -0.5953860  
H -2.2139610 0.7003340 1.4437940  
H 0.0266160 0.1496800 0.9507630  
H -0.8981900 0.1338350 -1.9801940  
H -2.6555730 -1.0429590 -0.9758980

|                       |            |            |            |   |            |            |            |
|-----------------------|------------|------------|------------|---|------------|------------|------------|
| O                     | -3.3437680 | 0.8864510  | -1.3018220 | C | 2.3698250  | -0.8295100 | -0.0631810 |
| H                     | -4.2497400 | 0.5593520  | -1.2399610 | O | 2.3506290  | -1.0192640 | 1.3395730  |
| O                     | -0.9638300 | 1.8139260  | -0.7742870 | C | 0.0046840  | 1.0432790  | 0.9821910  |
| H                     | -1.7694140 | 2.2047770  | -1.1375240 | C | 0.6827730  | 1.0814820  | -0.4066560 |
| O                     | -0.2261260 | -1.6068770 | -0.0730070 | C | 2.1524980  | 0.6647020  | -0.3822910 |
| H                     | -1.7423820 | -1.6968910 | 1.0601780  | H | 1.5772120  | -1.4182990 | -0.5397730 |
| C                     | -4.2812970 | 0.2232820  | 1.2006430  | H | 0.6035330  | 0.4708660  | 1.6857260  |
| H                     | -4.5331790 | 1.2567300  | 0.9622250  | H | 0.6561220  | 2.1255070  | -0.7434110 |
| H                     | -4.4758010 | 0.0474980  | 2.2630220  | H | 2.6723130  | 1.2489420  | 0.3894750  |
| O                     | -5.1095840 | -0.5996780 | 0.3895580  | O | 2.6395280  | 1.0044000  | -1.6728470 |
| H                     | -4.8504530 | -1.5105840 | 0.5703240  | H | 3.5989060  | 0.9120030  | -1.6526610 |
| C                     | 3.9818620  | -0.0547990 | 0.5837860  | O | -0.0497000 | 0.2792900  | -1.3146390 |
| N                     | 3.3487530  | 1.1208850  | 0.7349150  | H | 0.4016510  | 0.3213320  | -2.1646570 |
| C                     | 2.2195240  | 1.2673250  | 0.0563660  | O | -0.1371490 | 2.3756820  | 1.4947500  |
| C                     | 1.6179670  | 0.2013260  | -0.7368130 | H | 1.4499490  | -1.3374830 | 1.5668970  |
| C                     | 2.4421910  | -0.9961170 | -0.7753390 | C | 3.7145730  | -1.3114870 | -0.5804510 |
| N                     | 3.5878280  | -1.1250610 | -0.1228900 | H | 3.7281270  | -1.3436290 | -1.6704060 |
| H                     | 1.2535600  | 0.5206200  | -1.7077200 | H | 3.8899080  | -2.3217330 | -0.1988230 |
| N                     | 5.1526990  | -0.1754890 | 1.2300480  | O | 4.7613380  | -0.4302500 | -0.1908250 |
| H                     | 5.4815610  | 0.5854880  | 1.7989020  | H | 4.7678790  | -0.4057760 | 0.7718020  |
| H                     | 5.6532300  | -1.0461420 | 1.1792730  | C | -3.2528290 | -1.0371750 | -0.4228200 |
| N                     | 1.5968720  | 2.4429060  | 0.1411160  | N | -3.2774670 | 0.3235550  | -0.6310270 |
| H                     | 1.9993190  | 3.1424140  | 0.7446700  | C | -2.3572110 | 1.0083620  | -0.0251010 |
| H                     | 0.6542160  | 2.5402450  | -0.2245240 | C | -1.3839130 | 0.4005790  | 0.9603080  |
| N                     | 1.9861880  | -2.0383120 | -1.4837630 | C | -1.3252670 | -1.1166350 | 0.8158680  |
| H                     | 2.5067830  | -2.8934000 | -1.3403290 | N | -2.3696700 | -1.7621790 | 0.2180550  |
| H                     | 0.9665140  | -2.1338000 | -1.4532400 | H | -1.8181140 | 0.5888300  | 1.9516600  |
| <b>SINT8</b>          |            |            |            | N | -4.2968660 | -1.6760040 | -0.9887860 |
| H = -1002.735127 a.u. |            |            |            | H | -4.9353570 | -1.1533640 | -1.5623280 |
| G = -1002.800755 a.u. |            |            |            | H | -4.3253220 | -2.6805680 | -0.9580250 |

N -2.2996720 2.3311400 -0.2111480  
H -1.6331600 2.8964640 0.2950510  
H -2.9709380 2.7488100 -0.8361150  
N -0.3309850 -1.7406530 1.3366120  
H -0.4866170 -2.7408380 1.2102230  
H 0.6985600 2.6574640 1.8741150

### STS8\_9

H = -1002.659002 a.u.

G = -1002.723312 a.u.

C 2.1405990 -0.8281190 -0.3093790  
O 2.0436760 -1.7131380 0.7834630  
C 0.0624780 0.7135980 1.0573690  
C 1.1972110 1.4724350 0.3672250  
C 2.4445850 0.5877630 0.2521290  
H 1.2057320 -0.8183880 -0.8882260  
H 0.4804000 -0.1139900 1.6295220  
H 1.4546690 2.3433880 0.9833850  
H 2.8653620 0.4387890 1.2532850  
O 3.3312360 1.3514740 -0.5478510  
H 4.1600340 0.8585790 -0.6078280  
O 0.8167160 1.8999900 -0.9229080  
H 1.6366660 2.1126430 -1.3891620  
O -0.6115260 1.6205280 2.1227900  
H 1.0768270 -1.9471740 0.9109910  
C 3.2619660 -1.3156890 -1.2105010  
H 3.3514170 -0.7020000 -2.1078820  
H 3.0517320 -2.3477240 -1.5051830  
O 4.5071540 -1.2261460 -0.5262000  
H 4.4107740 -1.7399490 0.2841570  
C -3.5121140 -0.7863960 -0.4892520

N -3.2551340 0.5079800 -0.8164840  
C -2.1046240 0.9984270 -0.3955560  
C -1.2102910 0.2241800 0.4292710  
C -1.4938630 -1.2196640 0.5077110  
N -2.7244940 -1.6556580 0.1058920  
H -1.5189000 1.0251670 1.7111200

N -4.7553830 -1.2120750 -0.8387550  
H -5.2822850 -0.6355340 -1.4723710  
H -4.9292880 -2.2025180 -0.8091150  
N -1.8838440 2.3189320 -0.6424190  
H -0.9258780 2.5971300 -0.8139470  
H -2.5850550 2.7290020 -1.2420040  
N -0.5989200 -2.0376740 0.9788270  
H -0.9991920 -2.9724290 1.0022960  
H -0.3423230 1.3835990 3.0230800

### SINT9

H = -1002.722400 a.u.

G = -1002.791188 a.u.

C -2.2676920 0.1817790 -0.6784900  
O -2.7825020 1.4147420 -1.1376980  
C 0.2067340 0.2233900 1.0456540  
C -1.0039290 -0.5502960 1.4467140  
C -2.2678990 0.1217700 0.8721050  
H -1.2413070 0.0410550 -1.0429710  
H 0.1178070 1.2384340 1.4297620  
H -1.0790810 -0.4595180 2.5399870  
H -2.3097390 1.1519670 1.2415340  
O -3.3262100 -0.6499900 1.4195110  
H -4.0970500 -0.5828730 0.8363010  
O -1.0133610 -1.9215190 1.1038950

|                            |                     |            |            |   |            |            |            |
|----------------------------|---------------------|------------|------------|---|------------|------------|------------|
| H                          | -1.9120250          | -2.2224690 | 1.3004180  | C | -1.3647650 | -1.0124810 | 0.8629700  |
| O                          | -0.8909820          | 3.0370480  | 0.0020800  | C | -2.8110990 | -0.6766910 | 0.4671490  |
| H                          | -2.1687720          | 2.1161080  | -0.8523760 | H | -3.8566350 | -0.4761890 | -1.3930820 |
| C                          | -3.1549440          | -0.8729110 | -1.3267930 | H | -0.0080980 | 0.5231570  | -0.0409730 |
| H                          | -2.9405890          | -1.8694250 | -0.9395020 | H | -1.3997270 | -1.4082490 | 1.8856000  |
| H                          | -2.9827490          | -0.8657880 | -2.4069630 | H | -3.1854850 | 0.0242300  | 1.2287110  |
| O                          | -4.5205920          | -0.5955810 | -1.0418390 | O | -3.5119720 | -1.9002650 | 0.5684430  |
| H                          | -4.6687410          | 0.3156200  | -1.3246950 | H | -4.4220270 | -1.7650200 | 0.2936120  |
| C                          | 3.9407080           | -0.2691860 | -0.2766170 | O | -0.8561790 | -1.9649320 | -0.0385890 |
| N                          | 3.1335700           | -1.3485720 | -0.5445760 | H | 0.0885200  | -2.1079470 | 0.1509840  |
| C                          | 1.8610210           | -1.2203820 | -0.2838310 | O | -0.4745430 | 0.9506570  | 1.8814720  |
| C                          | 1.3284350           | 0.0208970  | 0.3349390  | H | -1.4472580 | -1.0474760 | -1.6168230 |
| C                          | 2.2534450           | 1.1965980  | 0.1674760  | C | -3.2332300 | 1.4773090  | -0.8610080 |
| N                          | 3.5898440           | 0.9593240  | 0.0105320  | H | -4.2099740 | 1.6586380  | -0.3986510 |
| H                          | 0.0860060           | 2.8429960  | 0.0287510  | H | -3.2557890 | 1.8637850  | -1.8806680 |
| N                          | 5.2564720           | -0.5486330 | -0.3716330 | O | -2.2129640 | 2.1940330  | -0.1780320 |
| H                          | 5.5386870           | -1.4518390 | -0.7104140 | H | -2.4129920 | 2.2414130  | 0.7611890  |
| H                          | 5.9181280           | 0.2045180  | -0.2922100 | C | 2.2143010  | -1.3148880 | -0.9763130 |
| N                          | 1.0435450           | -2.2208580 | -0.6294440 | N | 1.9993500  | -1.6093190 | 0.3177460  |
| H                          | 0.1206040           | -2.2876660 | -0.2121030 | C | 2.2641300  | -0.6185730 | 1.1899040  |
| H                          | 1.4984250           | -3.0587360 | -0.9602930 | C | 2.6376560  | 0.6550820  | 0.7776810  |
| N                          | 1.7586220           | 2.3835990  | 0.1943130  | C | 2.7050150  | 0.8640300  | -0.6042300 |
| H                          | 2.5195550           | 3.0559160  | 0.1110370  | N | 2.5460360  | -0.1354040 | -1.4865150 |
| H                          | -0.9796390          | 3.9901280  | 0.0648610  | H | 2.8262650  | 1.4536580  | 1.4815290  |
| <b>SINT6<sub>H2O</sub></b> |                     |            |            | N | 1.9822630  | -2.3281140 | -1.8632070 |
| H                          | = -1079.150583 a.u. |            |            | H | 2.0185630  | -3.2685180 | -1.5059500 |
| G                          | = -1079.225792 a.u. |            |            | H | 2.2883810  | -2.1699470 | -2.8092100 |
| C                          | -2.9624820          | -0.0212910 | -0.9352020 | N | 2.1220040  | -0.9329730 | 2.5144180  |
| O                          | -1.8528110          | -0.1851140 | -1.7841440 | H | 1.6831880  | -1.8189210 | 2.7119450  |
| C                          | -0.5377890          | 0.2604850  | 0.8906850  | H | 1.9155770  | -0.1820700 | 3.1536130  |

N 2.9584280 2.1031300 -1.1155190  
H 2.5343930 2.8630560 -0.5948080  
H 2.8140460 2.1573990 -2.1136890  
O 0.5526690 3.2036860 0.3443250  
H 0.3875390 2.6214260 1.0974020  
H -0.2390620 3.0939170 -0.1968130

**STS6\_7<sub>H2O</sub>**

H = -1079.136015 a.u.

G = -1079.206165 a.u.

C -2.8263860 -1.0585780 -0.6348190  
O -2.1974160 -0.5672030 -1.7971190  
C -0.5175050 0.4503270 0.6159050  
C -0.4376430 -1.0525870 0.4586150  
C -1.8601470 -1.6412020 0.4280670  
H -3.4801570 -1.9055870 -0.9111940  
H -0.7778870 0.9468120 -0.3272410  
H 0.0769860 -1.4926980 1.3210450  
H -2.3016920 -1.5043890 1.4221060  
O -1.6153980 -3.0277120 0.1875820  
H -2.4508630 -3.4940050 0.1073560  
O 0.2443620 -1.3686250 -0.7434450  
H 0.2913780 -2.3301450 -0.7981110  
O -0.9865250 0.8857850 1.7105230  
H -1.2947830 -0.9064110 -1.8447390  
C -3.8096200 0.0033710 -0.1288850  
H -4.3847540 -0.4299500 0.7013020  
H -4.5035350 0.2030430 -0.9476880  
O -3.2643190 1.2504480 0.2325840  
H -2.6952370 1.1469360 1.0136410  
C 3.1815450 -0.5274040 -0.4539310

N 2.9147520 -0.6320110 0.8623990  
C 2.0535170 0.2563500 1.3399120  
C 1.3423480 1.1651390 0.5025170  
C 1.7832940 1.1915360 -0.8659010  
N 2.6957790 0.3535770 -1.3406110  
H 1.0049820 2.1011230 0.9251280  
N 4.0501750 -1.4350020 -0.9437460  
H 4.5307980 -2.0414570 -0.3019050  
H 4.3547940 -1.3458510 -1.8978250  
N 1.7745860 0.2520810 2.6603370  
H 2.1239230 -0.5330240 3.1892270  
H 0.8832430 0.6532150 2.9363170  
N 1.2185130 2.0789290 -1.6910250  
H 0.4445080 2.6543540 -1.3674860  
H 1.4580780 2.0446360 -2.6688920  
O -1.2003330 3.2528870 -0.2300340  
H -1.1368400 2.9592940 0.6889430  
H -2.0189660 2.8247260 -0.5210710

**SINT7<sub>H2O</sub>**

H = -1079.148815 a.u.

G = -1079.218343 a.u.

C -2.9358660 -0.7562220 -0.5942370  
O -2.4992800 0.0691300 -1.6557830  
C -0.3467040 0.1791660 0.6573720  
C -0.4114290 -1.1827700 -0.0197130  
C -1.8526060 -1.7077710 -0.0385590  
H -3.7230880 -1.4308520 -0.9780680  
H -0.8935380 0.8682120 0.0052220  
H 0.1923570 -1.9131500 0.5360830  
H -2.1227150 -1.9783960 0.9864230

O -1.7497370 -2.8834030 -0.8514000  
H -2.6204900 -3.2713930 -0.9647230  
O 0.0878550 -1.0612900 -1.3507240  
H -0.0025180 -1.9286580 -1.7636110  
O -0.8420310 0.1221950 1.9209150  
H -1.6208150 -0.2117410 -1.9393380  
C -3.6843950 0.1036410 0.4374480  
H -4.0881890 -0.5730680 1.2042930  
H -4.5319480 0.5473760 -0.0918770  
O -2.9766160 1.1617740 1.0291380  
H -2.2189380 0.7813690 1.5833950  
C 3.4592220 -0.1819560 -0.3646780  
N 3.1490400 -0.6248300 0.8725140  
C 2.0336080 -0.1454050 1.3903120  
C 1.1232120 0.7868940 0.6671200  
C 1.6609000 1.1575140 -0.6734340  
N 2.7955000 0.6832300 -1.1542180  
H 0.9813800 1.6983770 1.2552450  
N 4.5945740 -0.6707600 -0.8767660  
H 5.1393410 -1.3189210 -0.3335650  
H 4.8792730 -0.3872120 -1.7990290  
N 1.6128540 -0.5105910 2.5884620  
H 2.1209790 -1.2427350 3.0634930  
H 0.5942670 -0.3164890 2.7543790  
N 0.9678990 2.0300530 -1.3823690  
H 0.0819920 2.4236020 -1.0485160  
H 1.3053830 2.2581360 -2.3054050  
O -1.4867420 3.0639920 -0.2737160  
H -2.1419000 2.4279590 0.0920570  
H -1.7131530 3.9201270 0.0929620

**STS7\_8<sub>H2O</sub>**

H = -1079.141425 a.u.

G = -1079.210675 a.u

C -2.8608480 -0.9079820 -0.8207730  
O -2.0181920 -0.6621160 -1.9248700  
C -0.3628900 0.4683640 0.5374630  
C -0.6528870 -1.0205590 0.6094940  
C -2.1350490 -1.3795340 0.4635740  
H -3.5556190 -1.7279020 -1.0778190  
H -0.6721540 0.8182340 -0.4568020  
H -0.3498500 -1.4128120 1.5866690  
H -2.6625110 -0.9815230 1.3379340  
O -2.1001430 -2.8109730 0.5346810  
H -2.9813340 -3.1585080 0.3788040  
O 0.1090670 -1.6599800 -0.4141670  
H -0.0548560 -2.6066660 -0.3293870  
O -1.0366430 1.1485310 1.5344560  
H -1.1808980 -1.1237750 -1.7995260  
C -3.7647120 0.3059210 -0.6047370  
H -4.5328150 0.0211400 0.1313160  
H -4.2691580 0.5061360 -1.5526750  
O -3.1161050 1.4918580 -0.2364930  
H -2.6080540 1.3561100 0.5821510  
C 3.1330510 -0.5345850 -0.7145230  
N 2.9710510 -0.8929290 0.5959670  
C 2.0498220 -0.2375240 1.2434190  
C 1.1943810 0.8177110 0.6318900  
C 1.7349520 1.2426510 -0.7007760  
N 2.6303400 0.5114970 -1.3679630  
H 1.2121030 1.6923500 1.2860910

|   |            |            |            |   |            |            |            |
|---|------------|------------|------------|---|------------|------------|------------|
| N | 3.9565780  | -1.3318630 | -1.4024770 | C | -3.7933720 | 0.0264980  | -0.4527480 |
| H | 4.3836700  | -2.1162230 | -0.9399360 | H | -4.5405410 | -0.4175690 | 0.2191750  |
| H | 4.1466670  | -1.1233750 | -2.3685080 | H | -4.2949010 | 0.3170970  | -1.3767900 |
| N | 1.8315880  | -0.4924490 | 2.5368310  | O | -3.2636490 | 1.2114160  | 0.1030360  |
| H | 2.3450390  | -1.2324780 | 2.9901790  | H | -2.8318780 | 1.0057720  | 0.9419860  |
| H | 1.0844970  | -0.0179080 | 3.0239780  | C | 3.2294380  | -0.4019290 | -0.5966400 |
| N | 1.2394790  | 2.3547460  | -1.1641990 | N | 3.0448170  | -0.5675850 | 0.7703070  |
| H | 0.4632470  | 2.8801220  | -0.5190790 | C | 2.0598840  | 0.0900190  | 1.2873180  |
| H | 1.5451550  | 2.6452080  | -2.0833970 | C | 1.1289480  | 0.9613190  | 0.4972670  |
| O | -0.4273440 | 3.2447130  | 0.5264280  | C | 1.5995520  | 1.1663190  | -0.9316090 |
| H | -1.1846120 | 3.7531310  | 0.2270720  | N | 2.6303860  | 0.4107030  | -1.4239560 |
| H | -0.8317950 | 2.2426990  | 1.1653500  | H | 1.1179120  | 1.9498020  | 0.9653390  |

### SINT8<sub>H2O</sub>

H = -1079.147639 a.u.

G = -1079.217574 a.u.

|   |            |            |            |
|---|------------|------------|------------|
| C | -2.7526250 | -1.0354430 | -0.7996610 |
| O | -1.9785000 | -0.5448580 | -1.8682770 |
| C | -0.3437750 | 0.4745080  | 0.5576770  |
| C | -0.4982370 | -1.0369390 | 0.5472550  |
| C | -1.9471460 | -1.5263060 | 0.4350500  |
| H | -3.3334610 | -1.9100160 | -1.1407200 |
| H | -0.8396940 | 0.8822560  | -0.3226620 |
| H | -0.1029640 | -1.4521580 | 1.4822890  |
| H | -2.4771640 | -1.2343750 | 1.3511580  |
| O | -1.7870560 | -2.9456500 | 0.4161310  |
| H | -2.6432160 | -3.3669230 | 0.3096350  |
| O | 0.2630380  | -1.5210430 | -0.5505720 |
| H | 0.2448070  | -2.4837910 | -0.5080030 |
| O | -0.9646030 | 0.9654520  | 1.7402750  |
| H | -1.1058120 | -0.9579470 | -1.8606300 |

|   |            |            |            |
|---|------------|------------|------------|
| H | 4.1906160  | -1.2139990 | -1.0859670 |
| H | 4.7603130  | -1.7321950 | -0.4399700 |
| H | 4.4766970  | -1.0930260 | -2.0427490 |
| N | 1.8147930  | 0.0182220  | 2.6080110  |
| H | 2.3639610  | -0.6141380 | 3.1690610  |
| H | 0.9667380  | 0.4215980  | 2.9796430  |
| N | 0.9714250  | 2.0644340  | -1.5932860 |
| H | -0.4098590 | 3.0457450  | -0.5550950 |
| H | 1.3444180  | 2.1197400  | -2.5399450 |
| O | -1.0692770 | 3.2482260  | 0.1412740  |
| H | -1.9165940 | 2.9957880  | -0.2469750 |
| H | -1.0386490 | 1.9252960  | 1.5710920  |

|   |            |            |            |
|---|------------|------------|------------|
| N | 4.1906160  | -1.2139990 | -1.0859670 |
| H | 4.7603130  | -1.7321950 | -0.4399700 |
| H | 4.4766970  | -1.0930260 | -2.0427490 |
| N | 1.8147930  | 0.0182220  | 2.6080110  |
| H | 2.3639610  | -0.6141380 | 3.1690610  |
| H | 0.9667380  | 0.4215980  | 2.9796430  |
| N | 0.9714250  | 2.0644340  | -1.5932860 |
| H | -0.4098590 | 3.0457450  | -0.5550950 |
| H | 1.3444180  | 2.1197400  | -2.5399450 |
| O | -1.0692770 | 3.2482260  | 0.1412740  |
| H | -1.9165940 | 2.9957880  | -0.2469750 |
| H | -1.0386490 | 1.9252960  | 1.5710920  |

### STS8\_9<sub>H2O</sub>

H = -1002.659002 a.u.

G = -1002.723312 a.u.

|   |            |            |           |
|---|------------|------------|-----------|
| C | -2.2826150 | 0.8389030  | 0.0059760 |
| O | -2.2935140 | 1.2594320  | 1.3504450 |
| C | -0.0524540 | -1.0929230 | 0.7820630 |



|   |            |            |            |                            |              |            |            |
|---|------------|------------|------------|----------------------------|--------------|------------|------------|
| C | -1.1810450 | -1.4946880 | -0.1956030 | N                          | 0.3051330    | 1.6131430  | 1.6837530  |
| C | -2.4743410 | -0.6985510 | -0.0104890 | H                          | 3.3371030    | -2.0949150 | 0.9018970  |
| H | -1.3367270 | 1.1128980  | -0.4818170 | H                          | 0.5820340    | 2.5579500  | 1.9392830  |
| H | -0.4995570 | -0.5828060 | 1.6380630  | O                          | 2.8275190    | -1.7173850 | 1.6386560  |
| H | -1.4332400 | -2.5442230 | 0.0155240  | H                          | 1.9010980    | -2.2253870 | 1.6483290  |
| H | -2.9077400 | -0.9610390 | 0.9620620  | H                          | -0.1133830   | -2.7907360 | 1.8909990  |
| O | -3.3084010 | -1.1689780 | -1.0606300 | <b>SINT9<sub>H2O</sub></b> |              |            |            |
| H | -4.1653360 | -0.7343330 | -0.9598240 | H =                        | -1079.127554 | a.u.       |            |
| O | -0.7468440 | -1.3955940 | -1.5362000 | G =                        | -1079.20467  | a.u.       |            |
| H | -1.5430540 | -1.4588160 | -2.0803020 | C                          | 2.5986850    | -0.4974920 | -0.7421400 |
| O | 0.5249030  | -2.3609940 | 1.3132920  | O                          | 2.1826240    | -1.8316820 | -0.5171560 |
| H | -1.3413610 | 1.4314400  | 1.6161960  | C                          | 0.1749070    | 0.1508960  | 0.5166740  |
| C | -3.4185830 | 1.5494040  | -0.7089130 | C                          | 1.2874400    | 1.0893810  | 0.8164730  |
| H | -3.4472520 | 1.2964520  | -1.7695910 | C                          | 2.5890100    | 0.2866360  | 0.6011300  |
| H | -3.2789670 | 2.6291410  | -0.6036480 | H                          | 1.9567870    | 0.0024950  | -1.4790380 |
| O | -4.6671530 | 1.1441920  | -0.1556090 | H                          | 0.3501490    | -0.7934360 | 1.0240920  |
| H | -4.6121470 | 1.3222670  | 0.7908460  | H                          | 1.2230290    | 1.3720220  | 1.8745310  |
| C | 2.9520130  | 1.4973260  | -0.6037520 | H                          | 2.6757370    | -0.4527080 | 1.4040600  |
| N | 2.8903260  | 0.2874450  | -1.2203090 | O                          | 3.6203570    | 1.2532630  | 0.6975050  |
| C | 1.9407870  | -0.5239910 | -0.7803890 | H                          | 4.4619210    | 0.7804710  | 0.6789390  |
| C | 1.0700970  | -0.2056430 | 0.2941960  | O                          | 1.3231990    | 2.2423770  | -0.0051490 |
| C | 1.1517750  | 1.1697570  | 0.7991000  | H                          | 2.2202270    | 2.5962500  | 0.0593540  |
| N | 2.1800220  | 1.9624650  | 0.3496690  | O                          | -0.6354890   | 0.1092460  | 3.2316250  |
| H | 2.3689720  | -0.8539810 | 1.2057240  | H                          | 1.2133010    | -1.9505140 | -0.5768430 |
| N | 3.9790790  | 2.2929970  | -1.0254150 | C                          | 4.0057700    | -0.5839960 | -1.3067750 |
| H | 4.4068120  | 2.0521570  | -1.9037940 | H                          | 4.3717650    | 0.4000060  | -1.6009820 |
| H | 3.9273390  | 3.2644330  | -0.7666420 | H                          | 3.9942410    | -1.2361630 | -2.1845320 |
| N | 2.0082730  | -1.8213190 | -1.2733200 | O                          | 4.9049070    | -1.0747830 | -0.3192360 |
| H | 2.5919030  | -1.8490550 | -2.1007030 | H                          | 4.5703000    | -1.9345210 | -0.0398790 |
| H | 1.0977920  | -2.2375020 | -1.4360270 | C                          | -3.4984670   | -0.1564900 | -0.9256640 |

|                                         |              |            |            |   |            |            |            |
|-----------------------------------------|--------------|------------|------------|---|------------|------------|------------|
| N                                       | -2.9427330   | 1.0629210  | -1.1953780 | O | 1.9085030  | -1.4809260 | -1.5955330 |
| C                                       | -1.6696360   | 1.2235320  | -0.9108210 | H | 2.7986210  | -1.8540310 | -1.5372040 |
| C                                       | -0.9054720   | 0.1275470  | -0.2807600 | O | -0.2639620 | -1.3309470 | 0.0482030  |
| C                                       | -1.5318040   | -1.2154340 | -0.4777780 | H | 0.0468230  | -2.0901010 | -0.4588730 |
| N                                       | -2.9021850   | -1.2841290 | -0.6119860 | O | 0.2961000  | 2.2044220  | -0.4782870 |
| H                                       | -3.2200210   | -1.2149890 | 1.4574550  | H | 2.8671650  | 1.2645540  | 1.0276090  |
| N                                       | -4.8556100   | -0.1625720 | -0.9914850 | C | 4.0587030  | -0.9292250 | 0.3446510  |
| H                                       | -5.2972290   | 0.6304830  | -1.4270270 | H | 4.5656310  | -0.9631270 | 1.3127440  |
| H                                       | -5.3107290   | -1.0598800 | -1.0374760 | H | 4.5041590  | -0.1214100 | -0.2439910 |
| N                                       | -1.1128650   | 2.4019950  | -1.1716080 | O | 4.2841000  | -2.1286240 | -0.3950590 |
| H                                       | -1.7205370   | 3.1272690  | -1.5193770 | H | 4.1406230  | -2.8826520 | 0.1829160  |
| H                                       | -0.1542300   | 2.5970400  | -0.8971430 | C | -3.3031050 | -1.0707720 | -0.0060400 |
| N                                       | -0.7536390   | -2.2339880 | -0.4983470 | N | -3.1391540 | -0.1872250 | -1.0839520 |
| H                                       | -3.8898380   | -0.0834830 | 2.2362310  | C | -2.4367390 | 0.8586460  | -0.8469670 |
| H                                       | -1.3047070   | -3.0853640 | -0.6020410 | C | -1.6956750 | 1.1088460  | 0.4336380  |
| O                                       | -3.1931110   | -0.7417090 | 2.3028030  | C | -2.1679710 | 0.1788410  | 1.5456150  |
| H                                       | -1.5082800   | -0.1736550 | 2.9123000  | N | -2.9577940 | -0.9116710 | 1.2295670  |
| H                                       | -0.5851530   | -0.2120870 | 4.1338390  | H | -1.8813500 | 2.1333930  | 0.7686450  |
| <b>SINT8'</b> <sub>H<sub>2</sub>O</sub> |              |            |            | N | -3.9512160 | -2.1998100 | -0.3756850 |
| H                                       | -1079.143301 | a.u.       |            | H | -4.3883500 | -2.2300300 | -1.2802970 |
| G                                       | -1079.215471 | a.u.       |            | H | -4.2324580 | -2.8403830 | 0.3473420  |
| C                                       | 2.5770830    | -0.6206820 | 0.5927330  | N | -2.2609060 | 1.7877690  | -1.8395370 |
| O                                       | 2.5041320    | 0.4790740  | 1.4692540  | H | -2.8631320 | 1.6703050  | -2.6433330 |
| C                                       | -0.1580300   | 1.0401840  | 0.2214080  | H | -2.1031090 | 2.7409040  | -1.5458750 |
| C                                       | 0.2983320    | -0.1923270 | -0.5559430 | N | -1.7932270 | 0.4760420  | 2.7240930  |
| C                                       | 1.8147400    | -0.3646650 | -0.7179900 | H | -2.1514250 | -0.2305690 | 3.3675290  |
| H                                       | 2.1053410    | -1.4646060 | 1.1077790  | H | 0.0546260  | 2.1032600  | -1.4076170 |
| H                                       | 0.2907690    | 1.0716520  | 1.2131200  | O | 2.9768490  | 2.7612960  | -0.0637940 |
| H                                       | -0.0908730   | -0.0953020 | -1.5859510 | H | 2.0156660  | 2.7832090  | -0.2119770 |
| H                                       | 2.2374840    | 0.5319890  | -1.1941790 | H | 3.2300530  | 3.6297600  | 0.2553150  |

**STS8'\_9'\_H2O**

H = -1079.030544 a.u.

G = -1079.103319 a.u.

C 2.5403410 -0.5288170 0.5641280  
O 2.2736130 0.6245870 1.2584270  
C -0.2209860 0.3218820 0.6012840  
C 0.2175150 -0.5446880 -0.5341150  
C 1.7496710 -0.5457500 -0.7596450  
H 2.2484850 -1.4315620 1.1383070  
H 0.3713760 0.2897760 1.5120040  
H -0.2898480 -0.2679900 -1.4667840  
H 2.0225840 0.3553280 -1.3205940  
O 1.9586860 -1.7075740 -1.5455340  
H 2.8825840 -1.9799690 -1.4268620  
O -0.2153610 -1.8270590 -0.1154320  
H 0.4175390 -2.4410920 -0.5220200  
O 0.5551810 2.4566660 -0.7564100  
H 2.7110360 1.7618720 0.7059250  
C 4.0456420 -0.6307360 0.2773390  
H 4.5816180 -0.5019800 1.2205860  
H 4.3423200 0.1763720 -0.3969010  
O 4.4202370 -1.8575760 -0.3644430  
H 4.4515690 -2.5526900 0.2976320  
C -3.4139310 -0.8116030 -0.2865470  
N -3.1302360 0.2891820 -1.0717320  
C -2.2974180 1.1594550 -0.5959430  
C -1.5197570 0.9453810 0.6815470  
C -2.2379460 -0.1824950 1.5850050  
N -3.0908330 -1.0265650 0.9620640  
H -1.4954290 1.8260920 1.3221210

N -4.1711060 -1.7255910 -0.9129800  
H -4.4414660 -1.5688680 -1.8683320  
H -4.4059810 -2.5786710 -0.4347010  
N -2.1191760 2.3319660 -1.2061200  
H -2.6177060 2.4853860 -2.0700970  
H -1.2768980 2.8628090 -0.9955600  
N -1.8908250 -0.1551480 2.8029120  
H -2.3994240 -0.8808730 3.3102110  
H 0.7872700 2.3078730 -1.6784820  
O 2.8869530 2.6862210 0.1543950  
H 1.4524490 2.6965410 -0.3315810  
H 3.2598980 3.3468470 0.7397700

**SINT9'\_H2O**

H = -1079.147958 a.u.

G = -1079.220686 a.u.

C 2.2173600 -0.2997850 0.8927560  
O 0.9894570 0.3253540 1.2430320  
C -0.1186630 -0.4451810 0.7368570  
C 0.5029280 -1.6604990 0.0381440  
C 1.8814880 -1.1338800 -0.3430040  
H 2.5428020 -0.9724770 1.6979290  
H -0.7110240 -0.8025740 1.5823500  
H -0.0726850 -2.0074680 -0.8221900  
H 1.8013800 -0.4713140 -1.2160610  
O 2.7640190 -2.2042570 -0.5791680  
H 3.6532420 -1.8328220 -0.6200770  
O 0.6262090 -2.6882400 1.0002580  
H 1.3444990 -3.2618560 0.7072110  
O 1.1529260 1.8414170 -2.1667890  
H 1.0946650 2.3628980 0.8454290

|                             |            |            |            |   |            |            |            |
|-----------------------------|------------|------------|------------|---|------------|------------|------------|
| C                           | 3.2839880  | 0.7437580  | 0.6184880  | C | -0.7613010 | -0.8378170 | 0.3904740  |
| H                           | 3.4628540  | 1.3742670  | 1.4947330  | C | -2.2853220 | -0.9553210 | 0.4232160  |
| H                           | 2.9705940  | 1.3795860  | -0.2127240 | H | -2.3493300 | -0.4309910 | -1.6756650 |
| O                           | 4.4746030  | 0.0754960  | 0.2032350  | H | 0.0941980  | 1.1572820  | -0.1234160 |
| H                           | 4.9996490  | -0.1398860 | 0.9776650  | H | -0.3768920 | -1.4847150 | 1.1863980  |
| C                           | -3.4426390 | -0.5070860 | 0.1781540  | H | -2.6314670 | -0.4793580 | 1.3490990  |
| N                           | -2.8567800 | -0.7774950 | -1.0541970 | O | -2.6177230 | -2.3271040 | 0.4216290  |
| C                           | -1.7080240 | -0.2085300 | -1.2414950 | H | -3.5143560 | -2.4046270 | 0.7625390  |
| C                           | -0.9833870 | 0.5090010  | -0.1398940 | O | -0.2834460 | -1.2219020 | -0.8734130 |
| C                           | -2.0214190 | 1.1912450  | 0.7251940  | H | 0.5404000  | -1.7117590 | -0.7611860 |
| N                           | -3.1478800 | 0.4545480  | 1.0154700  | O | -0.4914910 | 1.0756880  | 1.8142240  |
| H                           | -0.3212730 | 1.2472430  | -0.5738710 | H | -3.3373830 | 1.4059530  | 0.2357460  |
| N                           | -4.4796510 | -1.3194080 | 0.4608620  | C | -4.3631730 | -0.6142630 | -0.9740120 |
| H                           | -4.7897780 | -1.9742590 | -0.2356170 | H | -4.4161020 | -1.6466280 | -1.3312840 |
| H                           | -5.0300680 | -1.1353890 | 1.2822170  | H | -4.8105790 | 0.0514550  | -1.7178930 |
| N                           | -1.0803820 | -0.2529350 | -2.4242120 | O | -5.0078560 | -0.4772000 | 0.2916390  |
| H                           | -1.5539630 | -0.6797600 | -3.2059750 | H | -5.9594050 | -0.5243730 | 0.1787400  |
| H                           | -0.2762250 | 0.3484400  | -2.5789720 | C | 2.9992440  | -1.3990090 | -0.9325200 |
| N                           | -1.7759800 | 2.3635280  | 1.1718470  | N | 2.5485670  | -1.8520240 | 0.2462950  |
| H                           | -2.5437620 | 2.6643130  | 1.7729550  | C | 2.3877430  | -0.9150030 | 1.1981830  |
| H                           | 1.6262910  | 2.3422850  | -2.8344950 | C | 2.5874010  | 0.4372760  | 0.9562300  |
| O                           | 0.8151750  | 3.0924900  | 0.2751690  | C | 2.9761180  | 0.7869740  | -0.3455540 |
| H                           | 1.0627340  | 2.4357130  | -1.3903430 | N | 3.2225920  | -0.1369260 | -1.2874270 |
| H                           | -0.1241270 | 3.1730470  | 0.5443520  | H | 2.4442580  | 1.1890390  | 1.7196900  |
| <b>SINT6<sub>2H2O</sub></b> |            |            |            | N | 3.1721630  | -2.3478890 | -1.9062920 |
| H = -1155.572907 a.u.       |            |            |            | H | 3.2972840  | -3.2946020 | -1.5868960 |
| G = -1155.657034 a.u.       |            |            |            | H | 3.6962790  | -2.0549210 | -2.7148230 |
| C                           | -2.9169420 | -0.2169640 | -0.7687360 | N | 2.0056760  | -1.3689880 | 2.4327850  |
| O                           | -2.8119980 | 1.1894630  | -0.5448160 | H | 1.7144270  | -2.3327610 | 2.4798710  |
| C                           | -0.3472920 | 0.5910280  | 0.7165580  | H | 1.5543960  | -0.7215580 | 3.0596460  |

N 3.1326720 2.0886980 -0.6891970  
H 2.6098890 2.7687420 -0.1436110  
H 3.2378320 2.2644580 -1.6761970  
O 0.9837450 3.4419900 0.8524440  
H 0.5483020 2.8841320 1.5092550  
H 0.3142530 3.5399840 0.1573120  
O -1.0003260 3.2502130 -1.1691190  
H -1.6442930 2.5320740 -1.0638640  
H -1.4095000 3.9024990 -1.7403250

**STS6\_7<sub>2</sub>H<sub>2</sub>O**

H = -1155.554541 a.u.

G = -1155.632473 a.u.

C -2.6460210 -0.3480030 -0.4333280  
O -2.9915140 0.7586680 0.3992050  
C -0.0898690 0.5053260 0.6067220  
C -0.2493640 -0.9666500 0.2651610  
C -1.7387090 -1.3393000 0.3259690  
H -2.1180790 0.0162440 -1.3253950  
H -0.2054400 1.1439820 -0.2859000  
H 0.2693360 -1.5970500 0.9980210  
H -2.0552470 -1.3451520 1.3744830  
O -1.8067090 -2.6425440 -0.2268540  
H -2.6890820 -2.9861940 -0.0431300  
O 0.2667300 -1.1670890 -1.0295050  
H -0.0007440 -2.0498960 -1.3092560  
O -0.5163560 0.9088770 1.7276640  
H -2.3327340 0.8568110 1.1095140  
C -3.9322280 -1.0069360 -0.8954140  
H -3.7361980 -1.5981270 -1.7954390  
H -4.6528410 -0.2195050 -1.1320560

O -4.4178120 -1.8498650 0.1475900  
H -5.3627140 -1.9776350 0.0503200  
C 3.3362290 -1.0030900 -0.6153200  
N 3.0443020 -1.2409850 0.6794660  
C 2.3886730 -0.2705270 1.3000390  
C 1.8957300 0.8792440 0.6208570  
C 2.3681240 1.0277900 -0.7275730  
N 3.0760100 0.0908100 -1.3451950  
H 1.7261750 1.7855570 1.1837630  
N 3.9875330 -1.9943530 -1.2537260  
H 4.2582400 -2.8146680 -0.7402370  
H 4.2609350 -1.8609420 -2.2115200  
N 2.1019920 -0.4129670 2.6129810  
H 2.2600780 -1.3277420 3.0084800  
H 1.3195220 0.1256820 2.9683910  
N 2.0458340 2.1473780 -1.3819620  
H 1.4284940 2.8239320 -0.9369130  
H 2.2929620 2.2247440 -2.3549940  
O 0.0216370 3.5020380 0.3631970  
H -0.1991590 2.9172930 1.1041380  
H -0.8177190 3.5750390 -0.1208460  
O -2.4816440 3.1423650 -0.8878180  
H -2.8074980 2.3353150 -0.4464430  
H -3.2180440 3.7564220 -0.9064550

**SINT7<sub>2</sub>H<sub>2</sub>O**

H = -1155.567566 a.u.

G = -1155.642612 a.u.

C -2.8128690 -0.1774550 -0.1768560  
O -2.7437310 1.1890050 0.1858570  
C -0.0352190 0.5319780 0.4257230

|   |            |            |            |                                         |            |            |            |
|---|------------|------------|------------|-----------------------------------------|------------|------------|------------|
| C | -0.4424760 | -0.9312850 | 0.5215780  | N                                       | 1.3706060  | 0.9221380  | -2.2314170 |
| C | -1.9593540 | -1.0718000 | 0.7412060  | H                                       | 0.5906380  | 1.5798530  | -2.1155650 |
| H | -2.4575150 | -0.3078810 | -1.2130890 | H                                       | 1.6604000  | 0.6494290  | -3.1588380 |
| H | -0.4908540 | 0.9070410  | -0.4969980 | O                                       | -0.8316440 | 2.7869680  | -1.7613510 |
| H | 0.0498250  | -1.4149450 | 1.3776540  | H                                       | -1.6652190 | 2.4166670  | -1.4394860 |
| H | -2.1846980 | -0.7933470 | 1.7783660  | H                                       | -0.4991470 | 3.2842960  | -0.9875910 |
| O | -2.2132080 | -2.4550980 | 0.5337600  | O                                       | 0.1580200  | 3.5621490  | 0.6752110  |
| H | -3.1266780 | -2.5815210 | 0.2443220  | H                                       | -0.1316930 | 2.7121360  | 1.1533640  |
| O | -0.0490740 | -1.5615490 | -0.6824080 | H                                       | -0.0310760 | 4.3060910  | 1.2489280  |
| H | -0.5079520 | -2.4103090 | -0.7044000 | <b>STS7_8<sub>2</sub>H<sub>2</sub>O</b> |            |            |            |
| O | -0.4283050 | 1.2355820  | 1.5366590  | H = -1155.564613 a.u.                   |            |            |            |
| H | -2.0489880 | 1.3217020  | 0.8739540  | G = -1155.638721 a.u.                   |            |            |            |
| C | -4.3004510 | -0.5321220 | -0.1110020 | C                                       | -2.9064340 | -0.0268590 | -0.2438240 |
| H | -4.8623100 | 0.2561120  | -0.6188460 | O                                       | -2.8837770 | 1.3278780  | 0.1560190  |
| H | -4.6214790 | -0.5555040 | 0.9330040  | C                                       | -0.0345280 | 0.6007620  | 0.3821520  |
| O | -4.6067760 | -1.8154820 | -0.6527580 | C                                       | -0.5636070 | -0.8200530 | 0.4964660  |
| H | -4.4974890 | -1.7857420 | -1.6071020 | C                                       | -2.0863600 | -0.9133540 | 0.7051190  |
| C | 3.4935210  | -1.0966600 | -0.3530790 | H                                       | -2.4974910 | -0.1282470 | -1.2621820 |
| N | 3.2382590  | -0.8754550 | 0.9578200  | H                                       | -0.4432100 | 1.0552970  | -0.5275760 |
| C | 2.2952570  | 0.0039340  | 1.2156860  | H                                       | -0.1054490 | -1.3168390 | 1.3640630  |
| C | 1.5124050  | 0.7133830  | 0.1623300  | H                                       | -2.3213440 | -0.6026090 | 1.7316370  |
| C | 1.9562300  | 0.3244010  | -1.2108090 | O                                       | -2.3599600 | -2.2988530 | 0.5452690  |
| N | 2.9297030  | -0.5389090 | -1.4376000 | H                                       | -3.2399540 | -2.4206780 | 0.1629420  |
| H | 1.6605610  | 1.7949520  | 0.2705260  | O                                       | -0.1840940 | -1.4799520 | -0.6918890 |
| N | 4.4527240  | -1.9943290 | -0.5976510 | H                                       | -0.6555210 | -2.3221820 | -0.6906890 |
| H | 4.9052210  | -2.4529130 | 0.1752690  | O                                       | -0.4214170 | 1.3236710  | 1.5227460  |
| H | 4.6798460  | -2.2228650 | -1.5509760 | H                                       | -2.1833020 | 1.4770220  | 0.8101440  |
| N | 1.9544940  | 0.2912930  | 2.4631950  | C                                       | -4.3889090 | -0.4041060 | -0.2622050 |
| H | 2.3747900  | -0.2446310 | 3.2080080  | H                                       | -4.9362040 | 0.3872900  | -0.7804380 |
| H | 1.0587940  | 0.7893820  | 2.5806300  | H                                       | -4.7644870 | -0.4594430 | 0.7621280  |

|                             |            |            |            |   |            |            |            |
|-----------------------------|------------|------------|------------|---|------------|------------|------------|
| O                           | -4.6389210 | -1.6786880 | -0.8496670 | C | -0.4659210 | -0.8919880 | 0.6597060  |
| H                           | -4.4812330 | -1.6251660 | -1.7961700 | C | -1.9940910 | -1.0210740 | 0.7922720  |
| C                           | 3.1807940  | -1.4637380 | -0.3588860 | H | -2.3050750 | -0.4078310 | -1.2524790 |
| N                           | 2.9581600  | -1.2286120 | 0.9691240  | H | -0.4710060 | 0.9925390  | -0.3325780 |
| C                           | 2.1913160  | -0.2104850 | 1.2482210  | H | -0.0342200 | -1.3439870 | 1.5641340  |
| C                           | 1.5237570  | 0.6439790  | 0.2124070  | H | -2.3001920 | -0.6424670 | 1.7782200  |
| C                           | 1.9938770  | 0.2872890  | -1.1758730 | O | -2.2232290 | -2.4182720 | 0.7201580  |
| N                           | 2.7959340  | -0.7545140 | -1.4125160 | H | -3.0921370 | -2.5949040 | 0.3347530  |
| H                           | 1.7886790  | 1.6928260  | 0.3946710  | O | -0.0150480 | -1.5705520 | -0.4887050 |
| N                           | 3.9178620  | -2.5536790 | -0.6030910 | H | -0.3987190 | -2.4544190 | -0.4513160 |
| H                           | 4.2531090  | -3.1042730 | 0.1688580  | O | -0.3866500 | 1.2156480  | 1.7236210  |
| H                           | 4.1325050  | -2.7968940 | -1.5555350 | H | -2.3128290 | 1.3325050  | 0.8328430  |
| N                           | 1.9452320  | 0.1034610  | 2.5198420  | C | -4.2535860 | -0.6271040 | -0.3359780 |
| H                           | 2.3003240  | -0.5097480 | 3.2379470  | H | -4.7747030 | 0.0967730  | -0.9680040 |
| H                           | 1.1915360  | 0.7526330  | 2.7201960  | H | -4.6875490 | -0.5727030 | 0.6656830  |
| N                           | 1.6114090  | 1.0667650  | -2.1464570 | O | -4.4648150 | -1.9593070 | -0.7908860 |
| H                           | 1.0242620  | 2.0211600  | -1.9659250 | H | -4.2767320 | -2.0081430 | -1.7322550 |
| H                           | 1.9552100  | 0.8075410  | -3.0624510 | C | 3.4344840  | -1.0893250 | -0.6022180 |
| O                           | 0.3741730  | 3.1966440  | -1.5988880 | N | 3.2536330  | -1.0093940 | 0.7685760  |
| H                           | -0.5213930 | 3.3040020  | -1.9263330 | C | 2.3579680  | -0.1671930 | 1.1725560  |
| H                           | 0.4016910  | 3.4360950  | -0.4148410 | C | 1.5241630  | 0.6852150  | 0.2558710  |
| O                           | 0.4711550  | 3.4931540  | 0.7755920  | C | 1.8482110  | 0.4479950  | -1.2138270 |
| H                           | -0.1302370 | 2.3104270  | 1.3354940  | N | 2.8355490  | -0.4318530 | -1.5594260 |
| H                           | 0.3156390  | 4.3764080  | 1.1108380  | H | 1.7622620  | 1.7350510  | 0.4667080  |
| <b>SINT8<sub>2H2O</sub></b> |            |            |            | N | 4.3804160  | -1.9854500 | -0.9465050 |
| H = -1155.567819 a.u.       |            |            |            | H | 4.8835120  | -2.4705550 | -0.2246490 |
| G = -1155.644893 a.u.       |            |            |            | H | 4.6103370  | -2.1032100 | -1.9180590 |
| C                           | -2.7752350 | -0.2361820 | -0.2733700 | N | 2.1420670  | -0.0040920 | 2.4884250  |
| O                           | -2.7626250 | 1.1628180  | -0.0061220 | H | 2.6287180  | -0.6133670 | 3.1274430  |
| C                           | 0.0105230  | 0.5462340  | 0.5336500  | H | 1.3352130  | 0.5214730  | 2.7973810  |

|   |            |           |            |   |            |            |            |
|---|------------|-----------|------------|---|------------|------------|------------|
| N | 1.1859730  | 1.1278700 | -2.0777280 | O | -4.1479230 | 1.3448910  | -0.6863080 |
| H | -0.1455320 | 2.3467800 | -1.8841030 | H | -5.0337790 | 1.7041360  | -0.7599230 |
| H | 1.5147910  | 0.8809010 | -3.0101420 | C | 1.8451870  | 2.3349570  | -0.4027260 |
| O | -0.8417660 | 2.9948310 | -1.6073680 | N | 1.8268200  | 1.4399120  | -1.4179190 |
| H | -1.6382580 | 2.4811130 | -1.4238510 | C | 1.2001930  | 0.2894760  | -1.1474360 |
| H | -0.2401820 | 3.5768570 | -0.1510360 | C | 0.7050360  | -0.0372670 | 0.1282710  |
| O | 0.1213510  | 3.6658050 | 0.7665240  | C | 0.6765690  | 1.0470310  | 1.1109970  |
| H | -0.2320390 | 2.1734130 | 1.5774850  | N | 1.3169030  | 2.2242690  | 0.7953470  |
| H | 0.0540270  | 4.5873800 | 1.0206760  | H | 2.4298970  | -0.0999310 | 0.5245040  |

### STS8\_9<sub>2H2O</sub>

H = -1155.526334 a.u.

G = -1155.598666 a.u.

|   |            |            |            |
|---|------------|------------|------------|
| C | -2.5072580 | 0.3266260  | 0.7166080  |
| O | -2.3186360 | -0.2131340 | 1.9948710  |
| C | 0.0753010  | -1.3614190 | 0.4934240  |
| C | -1.2848330 | -1.8011660 | -0.1137410 |
| C | -2.3525270 | -0.7359570 | -0.3795990 |
| H | -1.7754470 | 1.1156800  | 0.5078120  |
| H | -0.0639050 | -1.3372150 | 1.5729780  |
| H | -1.6993600 | -2.5270300 | 0.5882430  |
| H | -3.3031020 | -1.2822590 | -0.4784390 |
| O | -2.0319140 | -0.1497060 | -1.6374760 |
| H | -2.7097370 | 0.5155090  | -1.8144780 |
| O | -1.0517880 | -2.5014240 | -1.3445410 |
| H | -1.4631450 | -1.9731870 | -2.0429210 |
| O | 0.9652410  | -2.4896590 | 0.2480280  |
| H | -1.4303720 | 0.1319240  | 2.3033510  |
| C | -3.9016780 | 0.9330840  | 0.6606070  |
| H | -3.9535460 | 1.7814960  | 1.3482030  |
| H | -4.6273590 | 0.1731030  | 0.9729160  |

|   |           |            |            |
|---|-----------|------------|------------|
| N | 2.5540960 | 3.4831270  | -0.6692670 |
| H | 2.6651430 | 3.7049520  | -1.6457530 |
| H | 2.3662160 | 4.2519300  | -0.0453640 |
| N | 1.2350510 | -0.6371520 | -2.1624110 |
| H | 1.4578650 | -0.2249840 | -3.0570940 |
| H | 0.4861000 | -1.3129030 | -2.1794880 |
| N | 0.0995150 | 0.8820520  | 2.2711350  |
| H | 3.8377470 | 0.1554470  | -0.1944370 |
| H | 0.2457710 | 1.7235740  | 2.8227120  |
| O | 3.4611030 | -0.2060280 | 0.6213860  |
| H | 3.5900030 | -1.2923820 | 0.7487070  |
| H | 0.7133700 | -2.8791550 | -0.6013100 |
| O | 3.4123850 | -2.5890140 | 0.9083850  |
| H | 3.5716530 | -2.9445500 | 1.7873220  |
| H | 2.4256010 | -2.6692250 | 0.6910640  |

|   |           |            |            |
|---|-----------|------------|------------|
| N | 2.5540960 | 3.4831270  | -0.6692670 |
| H | 2.6651430 | 3.7049520  | -1.6457530 |
| H | 2.3662160 | 4.2519300  | -0.0453640 |
| N | 1.2350510 | -0.6371520 | -2.1624110 |
| H | 1.4578650 | -0.2249840 | -3.0570940 |
| H | 0.4861000 | -1.3129030 | -2.1794880 |
| N | 0.0995150 | 0.8820520  | 2.2711350  |
| H | 3.8377470 | 0.1554470  | -0.1944370 |
| H | 0.2457710 | 1.7235740  | 2.8227120  |
| O | 3.4611030 | -0.2060280 | 0.6213860  |
| H | 3.5900030 | -1.2923820 | 0.7487070  |
| H | 0.7133700 | -2.8791550 | -0.6013100 |
| O | 3.4123850 | -2.5890140 | 0.9083850  |
| H | 3.5716530 | -2.9445500 | 1.7873220  |
| H | 2.4256010 | -2.6692250 | 0.6910640  |

### SINT9<sub>2H2O</sub>

H = -1155.530213 a.u.

G = -1155.612713 a.u.

|   |            |            |            |
|---|------------|------------|------------|
| C | -2.8265570 | -0.7503030 | -0.5636430 |
| O | -2.4618280 | -0.8071610 | -1.9211130 |
| C | -0.3937330 | 0.6101570  | -0.6377490 |



|   |            |            |            |                       |            |            |            |
|---|------------|------------|------------|-----------------------|------------|------------|------------|
| C | -1.5133690 | 1.5357260  | -0.2729190 | N                     | 0.2732410  | -1.8022500 | -1.7297940 |
| C | -2.8034660 | 0.6834320  | 0.0143540  | H                     | 4.7963050  | -0.5050520 | -0.2624700 |
| H | -2.1540220 | -1.3568010 | 0.0558910  | H                     | 0.7405010  | -2.6007600 | -2.1564860 |
| H | -0.4629080 | 0.3805180  | -1.6941350 | O                     | 4.4753530  | -0.1361700 | -1.0934730 |
| H | -1.6943360 | 2.1461800  | -1.1577150 | H                     | 3.7641070  | 1.5271530  | -0.8773700 |
| H | -3.6559720 | 1.2448580  | -0.3925820 | H                     | 0.4012610  | 3.4533750  | -0.2962080 |
| O | -2.9022290 | 0.6232020  | 1.4290790  | O                     | 3.4030300  | 2.4219640  | -0.7424990 |
| H | -3.6685870 | 0.0737880  | 1.6462660  | H                     | 4.0119930  | 3.0116060  | -1.1917800 |
| O | -1.2796590 | 2.4164920  | 0.8176930  | H                     | 1.6299440  | 2.8686640  | -1.0165350 |
| H | -1.9858750 | 2.2524940  | 1.4607140  | <b>(R)-INT6'</b>      |            |            |            |
| O | 0.7050500  | 3.1338250  | -1.1503720 | H = -1079.572137 a.u. |            |            |            |
| H | -1.5835410 | -1.2358440 | -1.9917450 | G = -1079.647489 a.u. |            |            |            |
| C | -4.2368370 | -1.3302600 | -0.5025270 | C                     | -2.7665090 | 0.2905620  | -1.0648780 |
| H | -4.1942220 | -2.3754660 | -0.8193820 | O                     | -2.0238930 | -0.5548130 | -1.9304970 |
| H | -4.8633340 | -0.7713910 | -1.2066630 | C                     | -0.4163460 | -1.0503540 | 0.0068900  |
| O | -4.7469090 | -1.2198510 | 0.8262690  | C                     | -1.3934430 | -0.4306070 | 0.9670050  |
| H | -5.6452520 | -1.5538070 | 0.8604000  | C                     | -2.7997340 | -0.3399130 | 0.3236840  |
| C | 2.6290100  | -1.6193340 | 0.8066960  | H                     | -3.7991990 | 0.3882980  | -1.4173080 |
| N | 2.1119440  | -0.7563160 | 1.7235540  | H                     | -1.0614220 | 0.5885720  | 1.1801360  |
| C | 1.0924370  | -0.0181040 | 1.3369360  | H                     | -3.4143890 | 0.2500250  | 1.0057040  |
| C | 0.5047220  | -0.1660560 | -0.0019220 | O                     | -3.2692460 | -1.6748030 | 0.2075780  |
| C | 0.9996440  | -1.3524150 | -0.7682340 | H                     | -4.1737160 | -1.7417900 | 0.5245940  |
| N | 2.1820400  | -1.9444980 | -0.3811380 | O                     | -1.4275870 | -1.1434320 | 2.1629040  |
| H | 3.8006440  | -0.7730960 | -1.3662840 | H                     | -1.8733200 | -1.9841420 | 1.9961420  |
| N | 3.8261680  | -2.1689990 | 1.1898720  | C                     | -2.0898980 | 1.6537270  | -1.0765530 |
| H | 4.0341390  | -2.1091720 | 2.1749310  | H                     | -2.3028800 | 2.1531550  | -2.0257590 |
| H | 4.0861190  | -3.0211220 | 0.7162280  | H                     | -1.0017190 | 1.5306950  | -0.9971940 |
| N | 0.6435210  | 0.9120020  | 2.1748170  | O                     | -2.6034780 | 2.3668450  | 0.0314890  |
| H | 1.1675700  | 1.0518600  | 3.0245550  | H                     | -2.3179400 | 3.2823890  | -0.0098620 |
| H | -0.0365050 | 1.5969660  | 1.8585840  | O                     | -0.1797990 | -2.2643980 | 0.0853460  |

|                       |            |            |            |   |            |            |            |
|-----------------------|------------|------------|------------|---|------------|------------|------------|
| H                     | -2.5307490 | -1.3651120 | -2.0577230 | H | 3.8804020  | -0.4323570 | -1.3590160 |
| H                     | 0.1095740  | -0.4476280 | -0.7385260 | H | 0.9099430  | -1.0603810 | 0.8444410  |
| C                     | 1.8205420  | 1.6582430  | -0.6746900 | H | 3.2477620  | -0.8356040 | 0.9553730  |
| N                     | 1.2318360  | 1.8823900  | 0.5045830  | O | 3.2818120  | 1.2293180  | 0.6703360  |
| C                     | 1.5062390  | 1.0130280  | 1.4866540  | H | 4.1871290  | 1.1428560  | 0.9811210  |
| C                     | 2.3158270  | -0.1211540 | 1.2721250  | O | 1.2558710  | 0.3174470  | 2.2889330  |
| C                     | 2.8669370  | -0.2244760 | 0.0041220  | H | 1.7832590  | 1.1212720  | 2.3916520  |
| N                     | 2.6245350  | 0.6294800  | -0.9859450 | C | 2.0795030  | -1.5935910 | -1.5141030 |
| H                     | 2.5404140  | -0.8220680 | 2.0646740  | H | 2.3672780  | -1.8600680 | -2.5343160 |
| N                     | 1.5388580  | 2.5320190  | -1.6743480 | H | 0.9960230  | -1.4069710 | -1.5087510 |
| H                     | 1.1683600  | 3.4306460  | -1.4096610 | O | 2.4285130  | -2.5939670 | -0.5783330 |
| H                     | 2.1115240  | 2.4837180  | -2.5023250 | H | 2.1966070  | -3.4601230 | -0.9209140 |
| N                     | 0.9262980  | 1.2546360  | 2.6799600  | O | 0.4842600  | 2.1239120  | 0.3870950  |
| H                     | 0.4547510  | 2.1347700  | 2.8161260  | H | 2.7744240  | 1.5305820  | -1.6647590 |
| H                     | 1.0977950  | 0.6662990  | 3.4776170  | H | -0.0284340 | 0.5663560  | -0.8145150 |
| N                     | 3.6805050  | -1.3182440 | -0.3537900 | C | -2.5470180 | -1.3486910 | -0.7261380 |
| H                     | 4.1745360  | -1.7339570 | 0.4283870  | N | -1.8856950 | -1.9336490 | 0.2796370  |
| H                     | 4.3285870  | -1.0518830 | -1.0896970 | C | -1.5146480 | -1.1398720 | 1.2851720  |
| H                     | 0.6215010  | -2.5911240 | -0.5945760 | C | -1.6874640 | 0.2697510  | 1.2324610  |
| O                     | 1.6831930  | -2.8912660 | -1.3066150 | C | -2.5309000 | 0.7138410  | 0.1986040  |
| H                     | 2.5153080  | -2.3970500 | -1.0550930 | N | -2.9219960 | -0.0537700 | -0.8039160 |
| H                     | 1.6435510  | -3.0351870 | -2.2566720 | H | -1.4602160 | 0.8876220  | 2.0914030  |
| <b>(R)-TS6'_8'</b>    |            |            |            | N | -2.8769840 | -2.1269980 | -1.7717490 |
| H = -1079.567218 a.u. |            |            |            | H | -2.7577840 | -3.1233830 | -1.6880920 |
| G = -1079.641226 a.u. |            |            |            | H | -3.4911670 | -1.7546470 | -2.4774550 |
| C                     | 2.8194120  | -0.3279130 | -1.1030060 | N | -0.9245470 | -1.7203630 | 2.3419480  |
| O                     | 2.2381520  | 0.7450890  | -1.8225820 | H | -0.7928170 | -2.7198400 | 2.3312020  |
| C                     | 0.4205590  | 0.8893290  | 0.1250680  | H | -0.4882950 | -1.1671100 | 3.0636900  |
| C                     | 1.2826880  | -0.0408350 | 0.9362940  | N | -2.9453050 | 2.0410660  | 0.1361960  |
| C                     | 2.7324950  | -0.0504550 | 0.3972330  | H | -2.9847450 | 2.5165370  | 1.0294870  |

H -3.8130870 2.1315940 -0.3830370  
H -0.0083120 2.6861380 -0.3297550  
O -0.8694050 3.3181130 -1.3081940  
H -1.7762910 3.0205510 -1.1152180  
H -0.7413790 3.4243020 -2.2549110

**(R)-INT8'**

H = -1003.187817 a.u.

G = -1003.253997 a.u.

C -2.9492060 0.2847420 -1.0176170  
O -2.2934670 -0.6527290 -1.8615610  
C -0.1630310 -0.6685040 -0.0133550  
C -1.1828760 0.0592790 0.8759940  
C -2.6516060 -0.0742910 0.4393950  
H -4.0358500 0.2115940 -1.1413830  
H -0.9493520 1.1281870 0.8832040  
H -3.2120300 0.6175420 1.0737310  
O -3.0339800 -1.4165530 0.7102770  
H -3.9809420 -1.4648530 0.8674590  
O -1.0718590 -0.4001280 2.2110700  
H -1.5581820 -1.2342340 2.2706010  
C -2.5049840 1.7018510 -1.3714810  
H -2.9055640 1.9671120 -2.3555840  
H -1.4094100 1.7324140 -1.4363950  
O -2.9873990 2.5579670 -0.3566040  
H -2.9587480 3.4708860 -0.6524010  
O -0.4822930 -2.0339300 -0.1551010  
H -2.8193220 -0.8227160 -2.6465690  
H -0.1179080 -0.1768030 -0.9923900  
C 3.2737050 0.8201110 -0.5140200  
N 2.6549850 1.3728920 0.5537010

C 1.7533660 0.6403470 1.1601840  
C 1.2661260 -0.6869120 0.6198390  
C 2.2479350 -1.1987590 -0.4124760  
N 3.1649720 -0.4459900 -0.9704870  
H 1.2076250 -1.3964070 1.4497170  
N 4.1210820 1.6033880 -1.1639390  
H 4.2797320 2.5440200 -0.8365880  
H 4.6469400 1.2301700 -1.9395040  
N 1.2517910 1.0624750 2.3085350  
H 1.5854010 1.9413360 2.6803730  
H 0.5035960 0.5529340 2.7707820  
N 2.1464920 -2.4646650 -0.7784760  
H 1.3381750 -3.0053490 -0.4986390  
H 2.7581310 -2.8020290 -1.5091550  
H -1.3321470 -2.0946950 -0.6160350

**(R)-**

**TS8'\_9'**

H = -1003.117794 a.u.

G = -1003.183943 a.u.

C -3.2425570 0.6779520 0.4185710  
O -2.5892860 1.8656260 0.0065190  
C -0.2728060 0.2214900 -0.3071210  
C -1.2652960 -0.9311610 -0.1844070  
C -2.7226440 -0.4955120 -0.4144260  
H -4.3192370 0.7458850 0.2175650  
H -1.1833540 -1.3449680 0.8254970  
H -3.3407410 -1.3666110 -0.1834680  
O -2.7900690 -0.2109690 -1.8185930  
H -3.6960640 -0.0572460 -2.1044090  
O -0.9757890 -1.9673760 -1.1033120  
H -1.5158030 -1.8616070 -1.8953590

|                  |              |            |            |   |            |            |            |
|------------------|--------------|------------|------------|---|------------|------------|------------|
| C                | -3.0409280   | 0.4330260  | 1.9131640  | C | 0.0406670  | 0.4550790  | 0.1058700  |
| H                | -3.5969500   | 1.1886340  | 2.4778900  | C | 1.2047470  | -0.2291310 | 0.7849460  |
| H                | -1.9767030   | 0.5451990  | 2.1594480  | C | 2.5505200  | 0.2743970  | 0.2616130  |
| O                | -3.5012390   | -0.8743280 | 2.1789880  | H | 3.6716310  | 0.3532620  | -1.5491140 |
| H                | -3.6082750   | -1.0074230 | 3.1241400  | H | 1.1399810  | -1.3107890 | 0.6053030  |
| O                | -0.3386950   | 0.7862280  | -1.6965050 | H | 3.3317780  | -0.0609470 | 0.9544370  |
| H                | -3.1480880   | 2.6273760  | 0.1814600  | O | 2.4882100  | 1.6956960  | 0.2550010  |
| H                | -0.5672070   | 1.0224310  | 0.3676980  | H | 3.3577780  | 2.0563220  | 0.0564960  |
| C                | 3.8454440    | 0.0579130  | 0.4426230  | O | 1.0683650  | 0.0368670  | 2.1802870  |
| N                | 3.2635320    | -1.1461120 | 0.3561560  | H | 1.9127010  | -0.1000820 | 2.6231410  |
| C                | 1.9829290    | -1.1937320 | 0.0251770  | C | 3.4767710  | -1.7058660 | -1.0170110 |
| C                | 1.2335950    | 0.0117830  | -0.3264470 | H | 3.7261000  | -2.0498190 | -2.0272630 |
| C                | 1.9916920    | 1.2408220  | -0.0770380 | H | 2.7274660  | -2.3920990 | -0.6031270 |
| N                | 3.2659230    | 1.2578170  | 0.2499200  | O | 4.6218900  | -1.6220170 | -0.1950630 |
| H                | 0.7471020    | 0.2741580  | -1.7299380 | H | 5.1387810  | -2.4283110 | -0.2624890 |
| N                | 5.1408390    | 0.0724670  | 0.7582080  | O | 0.2100360  | 3.4168310  | 0.5210690  |
| H                | 5.6233730    | -0.7976340 | 0.9135960  | H | 1.9428370  | -0.3960930 | -2.8306940 |
| H                | 5.6229910    | 0.9528670  | 0.8378690  | H | 0.3107110  | 1.2391550  | -0.5902510 |
| N                | 1.4326460    | -2.4117630 | 0.0335780  | C | -3.6410880 | -0.8471680 | -0.4446880 |
| H                | 2.0692280    | -3.1695390 | 0.2346090  | N | -2.9853990 | -1.5028280 | 0.5427950  |
| H                | 0.5656040    | -2.6090750 | -0.4484290 | C | -1.8551280 | -0.9788680 | 0.9556110  |
| N                | 1.3963750    | 2.4451550  | -0.1900780 | C | -1.2639920 | 0.1806410  | 0.2539140  |
| H                | 0.5145080    | 2.5711660  | -0.6599170 | C | -2.2660490 | 0.9460200  | -0.5237230 |
| H                | 1.9977350    | 3.2485410  | -0.0818030 | N | -3.3927440 | 0.3912980  | -0.9150290 |
| H                | -1.1792860   | 0.5859740  | -2.1682760 | H | 0.2120520  | 4.1661880  | 1.1210780  |
| <b>(R)-INT9'</b> |              |            |            | N | -4.6947740 | -1.4716250 | -0.9550710 |
| H                | -1003.175346 | a.u.       |            | H | -4.9598660 | -2.3753990 | -0.5959410 |
| G                | -1003.246787 | a.u.       |            | H | -5.2547720 | -1.0086040 | -1.6539190 |
| C                | 2.8999260    | -0.2956280 | -1.1155620 | N | -1.2242650 | -1.5323840 | 1.9839610  |
| O                | 1.7241670    | -0.2867170 | -1.9012360 | H | -1.6710700 | -2.3214110 | 2.4301450  |

|                       |            |            |            |                       |            |            |            |
|-----------------------|------------|------------|------------|-----------------------|------------|------------|------------|
| H                     | -0.4420270 | -1.0625550 | 2.4302200  | C                     | -2.7682520 | 1.1465620  | -0.5250280 |
| N                     | -1.9999530 | 2.2002100  | -0.8477970 | C                     | -3.1635170 | 0.8673190  | 0.7708310  |
| H                     | -1.2243040 | 2.7145230  | -0.4248680 | C                     | -3.0160710 | -0.4699700 | 1.1778000  |
| H                     | -2.6836040 | 2.6911220  | -1.4068340 | N                     | -2.5523440 | -1.4160720 | 0.3436150  |
| H                     | 1.0641720  | 2.9707080  | 0.6153810  | H                     | -3.5335580 | 1.6308680  | 1.4414510  |
| <b>(S)-INT6'</b>      |            |            |            | N                     | -1.8143030 | -2.0017020 | -1.7608180 |
| H = -1079.574556 a.u. |            |            |            | H                     | -1.9220430 | -1.7622510 | -2.7382520 |
| G = -1079.649343 a.u. |            |            |            | H                     | -2.1430790 | -2.9304600 | -1.5270500 |
| C                     | 3.2556560  | -0.6712770 | 0.2097460  | N                     | -2.7120980 | 2.4602210  | -1.0100990 |
| O                     | 2.6104840  | -0.7941820 | 1.4827680  | H                     | -2.8037470 | 2.4881560  | -2.0207050 |
| C                     | 0.3350260  | -0.4708910 | 0.8495520  | H                     | -3.3568420 | 3.0998720  | -0.5608190 |
| C                     | 0.8669400  | -0.6547150 | -0.5381140 | N                     | -3.2875820 | -0.8675890 | 2.4386730  |
| C                     | 2.2441930  | 0.0431990  | -0.6763260 | H                     | -3.3115230 | -1.8579770 | 2.6254780  |
| H                     | 3.4616200  | -1.6538580 | -0.2236530 | H                     | -3.7570180 | -0.2523060 | 3.0816660  |
| H                     | 0.1676890  | -1.3503590 | 1.4683590  | O                     | -0.0130200 | 2.5091050  | -0.2782150 |
| H                     | 0.1815940  | -0.1482530 | -1.2324140 | H                     | 0.4351030  | 3.3404060  | -0.0892910 |
| H                     | 2.1546020  | 1.0791850  | -0.3334770 | H                     | -0.9276130 | 2.7040380  | -0.5996250 |
| O                     | 2.6958420  | -0.0278760 | -1.9978050 | H                     | 0.0404880  | 1.4539620  | 0.6645960  |
| H                     | 2.5008900  | 0.7893230  | -2.4625600 | <b>(S)-TS6'_8'</b>    |            |            |            |
| O                     | 0.9949420  | -2.0165830 | -0.8035340 | H = -1079.564963 a.u. |            |            |            |
| H                     | 0.2024680  | -2.3014460 | -1.2805840 | G = -1079.638768 a.u. |            |            |            |
| O                     | -0.0178580 | 0.6293020  | 1.3239060  | C                     | 2.7771400  | -1.0391810 | 0.3892430  |
| H                     | 2.9275180  | -1.5793630 | 1.9391530  | O                     | 2.6966780  | -0.4029340 | 1.6619600  |
| C                     | 4.5308350  | 0.1488880  | 0.3492500  | C                     | 0.2682810  | 0.4676050  | 1.1208760  |
| H                     | 4.9645190  | 0.3019430  | -0.6398840 | C                     | 0.5410520  | -0.0184410 | -0.2690050 |
| H                     | 5.2564540  | -0.3976450 | 0.9615770  | C                     | 2.0568920  | -0.0753790 | -0.5504900 |
| O                     | 4.2546610  | 1.4233720  | 0.8912040  | H                     | 2.2497070  | -1.9999480 | 0.4055140  |
| H                     | 4.0280040  | 1.3140460  | 1.8191910  | H                     | 0.0408810  | -0.2572730 | 1.8981020  |
| C                     | -2.2775360 | -1.0238120 | -0.8965660 | H                     | 0.1207130  | 0.6896540  | -0.9959470 |
| N                     | -2.3207560 | 0.2187400  | -1.3780310 | H                     | 2.4788960  | 0.9259860  | -0.4194250 |

|   |            |            |            |                       |            |            |            |
|---|------------|------------|------------|-----------------------|------------|------------|------------|
| O | 2.1443290  | -0.4994820 | -1.8887790 | H                     | 0.7509630  | 2.2778290  | 0.7158190  |
| H | 3.0147080  | -0.2645050 | -2.2307790 | <b>(S)-INT8'</b>      |            |            |            |
| O | -0.0510610 | -1.2805070 | -0.3784980 | H = -1003.192132 a.u. |            |            |            |
| H | 0.1505110  | -1.6258630 | -1.2572220 | G = -1003.258634 a.u. |            |            |            |
| O | 0.5301100  | 1.6472530  | 1.4927450  | C                     | 2.8427260  | -0.2281430 | 0.6186600  |
| H | 2.9936600  | -1.0050610 | 2.3506900  | O                     | 2.8564870  | 1.1578940  | 0.9689760  |
| C | 4.2125870  | -1.2636540 | -0.0701420 | C                     | 0.0611550  | 0.9166150  | 0.4622920  |
| H | 4.2111990  | -1.9469940 | -0.9210810 | C                     | 0.4998520  | -0.2253540 | -0.4507180 |
| H | 4.7891790  | -1.7375630 | 0.7321530  | C                     | 2.0128680  | -0.3052520 | -0.6724430 |
| O | 4.8206360  | -0.0674980 | -0.5167340 | H                     | 2.3580660  | -0.8085480 | 1.4145880  |
| H | 5.0832300  | 0.4636200  | 0.2402160  | H                     | 0.4618000  | 0.7259110  | 1.4639110  |
| C | -2.8802520 | -0.9175760 | -1.0231950 | H                     | 0.0476760  | -0.0958200 | -1.4442180 |
| N | -2.5918090 | 0.3764130  | -1.2902580 | H                     | 2.3287430  | 0.5276340  | -1.3084110 |
| C | -2.3298590 | 1.1290350  | -0.2402160 | O                     | 2.1956810  | -1.5414680 | -1.3307000 |
| C | -2.2141760 | 0.6217280  | 1.0614320  | H                     | 3.0602760  | -1.5277330 | -1.7573630 |
| C | -2.6294190 | -0.7306850 | 1.2134730  | O                     | 0.0133880  | -1.4005620 | 0.1612530  |
| N | -2.9735980 | -1.4875000 | 0.1828920  | H                     | 0.3759890  | -2.1539770 | -0.3218460 |
| H | -2.1049850 | 1.2741140  | 1.9182440  | O                     | 0.4964340  | 2.1707070  | -0.0064040 |
| N | -3.1055350 | -1.7056150 | -2.0871430 | H                     | 3.5590540  | 1.3428630  | 1.5982060  |
| H | -3.1910930 | -1.2852480 | -2.9980070 | C                     | 4.2379570  | -0.7907260 | 0.4014870  |
| H | -3.4365960 | -2.6438740 | -1.9312780 | H                     | 4.1823290  | -1.8837730 | 0.4291750  |
| N | -2.0756130 | 2.4816710  | -0.5041630 | H                     | 4.8956400  | -0.4630890 | 1.2159440  |
| H | -2.4985780 | 2.7468170  | -1.3892540 | O                     | 4.7068820  | -0.3379640 | -0.8576010 |
| H | -2.3791320 | 3.0970190  | 0.2426390  | H                     | 5.6439660  | -0.5272290 | -0.9500760 |
| N | -2.6317160 | -1.3090410 | 2.4375130  | C                     | -3.3916330 | -0.7568830 | -0.3677390 |
| H | -3.0311410 | -2.2342020 | 2.4994450  | N                     | -3.0171050 | 0.2216100  | -1.2242720 |
| H | -2.6638050 | -0.7368730 | 3.2658380  | C                     | -2.1371520 | 1.0853220  | -0.7892700 |
| O | 0.7655400  | 3.0661980  | -0.5640500 | C                     | -1.4855460 | 1.0005820  | 0.5728240  |
| H | 1.1823820  | 3.9174250  | -0.7291030 | C                     | -2.1056650 | -0.1169160 | 1.3795290  |
| H | -0.1761420 | 3.1084910  | -0.8134560 | N                     | -3.0209460 | -0.9247900 | 0.9215440  |

H -1.6920070 1.9403820 1.0980470  
N -4.2468910 -1.6459090 -0.8446330  
H -4.5802260 -1.5576020 -1.7925660  
H -4.5737860 -2.3907110 -0.2481320  
N -1.7749220 2.0918720 -1.5689770  
H -2.1804950 2.1537410 -2.4927620  
H -1.0061570 2.6956520 -1.3029620  
N -1.7277840 -0.2380830 2.6461260  
H -2.1277300 -0.9843830 3.1975370  
H -1.0355590 0.3607850 3.0648140  
H 1.4376290 2.2486680 0.2156730

**(S)-TS8' 9'**

H = -1003.120356 a.u.

G = -1003.186652 a.u.

C 3.0077380 0.6554450 -0.3544780  
O 2.5443680 0.4321100 -1.6970880  
C 0.0484770 0.1433650 -0.3246490  
C 0.9136880 -0.2224110 0.8654450  
C 2.3841330 -0.4595930 0.5053620  
H 2.6607580 1.6356820 -0.0064460  
H 0.3332320 1.1491010 -0.6393420  
H 0.5454340 -1.1187380 1.3766430  
H 2.4757640 -1.3960000 -0.0570100  
O 3.0275060 -0.5510510 1.7556170  
H 3.8765520 -0.9907330 1.6277720  
O 0.7669530 0.9122400 1.6943970  
H 1.3090760 0.7820170 2.4824160  
O 0.2396230 -0.7297290 -1.5008510  
H 3.0588360 0.9507220 -2.3229530  
C 4.5242420 0.6201250 -0.2664930

H 4.8299930 1.0871780 0.6751180  
H 4.9526070 1.2053290 -1.0893600  
O 4.9354570 -0.7345250 -0.3217700  
H 5.8849880 -0.7896170 -0.4569450  
C -4.1238990 -0.0582180 -0.0136680  
N -3.4720030 -1.2302970 0.1002330  
C -2.1565180 -1.1888410 0.0101870  
C -1.4538130 0.0479220 -0.2867390  
C -2.2659030 1.2286540 -0.0721330  
N -3.5784510 1.1747630 -0.0335220  
H -0.9296520 -0.4007730 -1.6228870  
N -5.4535290 -0.1194600 -0.0642880

H -5.9125750 -1.0136330 0.0015840  
H -5.9883360 0.7332380 -0.1037010  
N -1.5042440 -2.3580240 0.1429990  
H -2.0747250 -3.1883840 0.2144490  
H -0.5399660 -2.4666490 -0.1232120  
N -1.6793170 2.4366170 0.0640880  
H -2.3129150 3.1962920 0.2728750  
H -0.7662240 2.4892120 0.4940370  
H 1.0298340 -0.4204950 -2.0090490

**(S)-INT9'**

H = -1003.176602 a.u.

G = -1003.24673 a.u.

C -2.7775910 0.7095600 -0.4481850  
O -1.9874690 1.5913780 0.3619180  
C 0.1837560 0.2897220 -0.8414230  
C -0.8156740 -0.7924250 -1.1267510  
C -2.1218230 -0.6712190 -0.3240290  
H -2.7449870 1.0374220 -1.4934180

H 0.0079330 1.1812940 -1.4391550  
H -0.3935440 -1.7776230 -0.9005480  
H -1.9282720 -0.8674600 0.7326380  
O -2.9566960 -1.6665820 -0.8755890  
H -3.6438060 -1.8759700 -0.2334560  
O -1.0884840 -0.6678410 -2.5051220  
H -1.7648400 -1.3198320 -2.7274310  
O -0.6839090 0.2204320 2.4398220  
H -2.3931900 2.4638720 0.3677350  
C -4.2262420 0.6603980 0.0069650  
H -4.8271530 0.2011750 -0.7844380  
H -4.5965600 1.6800950 0.1678710  
O -4.2801160 -0.1047900 1.2006620  
H -5.1620360 -0.0594480 1.5788850  
C 3.9142140 -0.2898410 0.0294870  
N 3.1053800 -1.2409660 0.5456780  
C 1.8255840 -0.9535680 0.5918040  
C 1.3051460 0.2377680 -0.1040830  
C 2.3234490 1.2998050 -0.2156170  
N 3.5991160 1.0084330 -0.2093350  
H -0.9675950 0.2774290 3.3558700  
N 5.1752620 -0.6335670 -0.1826540  
H 5.4781540 -1.5720930 0.0285990  
H 5.8316140 0.0578410 -0.5117950  
N 0.9766320 -1.7523540 1.2270980  
H 1.3735990 -2.5525280 1.7027760  
H 0.1276990 -1.3320340 1.6035810  
N 1.9354380 2.5616380 -0.3823660  
H 2.6411920 3.2734280 -0.5082890  
H 0.9760840 2.8350450 -0.2442920

H -1.2486080 0.8251290 1.9333810

**INT10'**

H = -926.7600897 a.u.

G = -926.8248937 a.u.

C -2.9019890 0.6513220 0.8264340  
O -1.7127380 1.1521240 1.4134290  
C -0.0643620 0.4639130 -0.5808970  
C -1.2075200 -0.5266190 -0.6898960  
C -2.5696200 0.1534410 -0.5798080  
H -3.6559170 1.4416200 0.7262090  
H -1.1025780 -1.2892570 0.0867810  
H -3.3256600 -0.5872850 -0.8587330  
O -2.5166990 1.1948350 -1.5473100  
H -3.4048820 1.5018540 -1.7502160  
O -1.1261370 -1.2123770 -1.9341940  
H -1.4214620 -0.6105720 -2.6300110  
C -3.5009710 -0.4614140 1.6817200  
H -3.6737130 -0.0716830 2.6920670  
H -2.7963740 -1.2998800 1.7578120  
O -4.7056480 -0.8419950 1.0549800  
H -5.1844370 -1.4670260 1.6042620  
H -1.9197550 1.6340520 2.2191090  
H -0.3632380 1.5056020 -0.5496780  
C 3.6032030 -0.2659660 0.7198720  
N 2.9474690 -1.3694420 0.3089040  
C 1.8290020 -1.1850540 -0.3585230  
C 1.2439690 0.1680810 -0.4970180  
C 2.2443040 1.2390080 -0.2874210  
N 3.3601310 1.0178190 0.3592220  
N 4.6476630 -0.4590500 1.5116240



|   |           |            |            |   |           |            |            |
|---|-----------|------------|------------|---|-----------|------------|------------|
| H | 4.9079770 | -1.3978790 | 1.7725850  | C | 3.5688690 | -0.3170360 | -0.4296510 |
| H | 5.2021340 | 0.3305640  | 1.8052960  | N | 3.0226960 | 0.8230820  | -0.8605340 |
| N | 1.2175470 | -2.2370900 | -0.8817870 | C | 1.8015620 | 1.1166640  | -0.4317370 |
| H | 1.6599280 | -3.1377490 | -0.7568440 | C | 1.0874060 | 0.2371940  | 0.4454230  |
| H | 0.4312270 | -2.1359590 | -1.5192070 | C | 1.8299070 | -0.8946780 | 0.8874310  |
| N | 1.9947230 | 2.4702470  | -0.7281430 | N | 3.0329460 | -1.1864040 | 0.4643090  |
| H | 1.2278740 | 2.6759500  | -1.3466780 | N | 4.7751890 | -0.6366280 | -0.9040610 |
| H | 2.6798210 | 3.1892680  | -0.5435210 | H | 5.2389380 | -0.0120140 | -1.5434600 |

**TS10' \_11'**

H = -926.7358372 a.u.

G = -926.7976322 a.u.

|   |            |            |            |
|---|------------|------------|------------|
| C | -2.4590200 | -0.9635830 | -0.1201450 |
| O | -1.0103630 | -1.1486230 | -0.0451450 |
| C | -0.3118860 | 0.2584830  | 0.7176290  |
| C | -1.3124500 | 1.1939500  | 0.0507270  |
| C | -2.6732800 | 0.5120610  | 0.2483410  |
| H | -2.9511220 | -1.6124700 | 0.6058000  |
| H | -1.0783530 | 1.2686940  | -1.0135130 |
| H | -3.4389380 | 0.9586400  | -0.3887590 |
| O | -2.9746910 | 0.6785080  | 1.6201660  |
| H | -3.9246290 | 0.6430280  | 1.7666620  |
| O | -1.2571740 | 2.4802160  | 0.5934200  |
| H | -1.7496610 | 2.4853650  | 1.4257220  |
| C | -2.9063320 | -1.3009480 | -1.5323180 |
| H | -2.6349040 | -2.3356100 | -1.7657860 |
| H | -2.4036220 | -0.6380810 | -2.2482650 |
| O | -4.2996090 | -1.1027280 | -1.5111980 |
| H | -4.6905420 | -1.3746700 | -2.3456650 |
| H | -0.6909950 | -1.9324090 | 0.4398780  |
| H | -0.6221520 | 0.0068720  | 1.7318770  |

|   |           |            |            |
|---|-----------|------------|------------|
| H | 5.2339800 | -1.4700360 | -0.5746220 |
| N | 1.2836170 | 2.2904370  | -0.8467700 |
| H | 1.9103890 | 2.8732410  | -1.3832850 |
| H | 0.5579600 | 2.7526840  | -0.3144520 |
| N | 1.2010050 | -1.8444580 | 1.6981910  |
| H | 0.7703710 | -1.4630300 | 2.5341240  |
| H | 1.8511550 | -2.5840300 | 1.9436640  |

**INT11'**

H = -926.7626605 a.u.

G = -926.8262285 a.u.

|   |           |            |            |
|---|-----------|------------|------------|
| C | 2.4943890 | -0.8599230 | -0.1849140 |
| O | 1.1386780 | -0.9470410 | -0.6687050 |
| C | 0.4851800 | 0.3379170  | -0.6875600 |
| C | 1.3543800 | 1.1986500  | 0.2607890  |
| C | 2.7573180 | 0.6242480  | 0.0144130  |
| H | 3.1640350 | -1.2743590 | -0.9410400 |
| H | 1.0492750 | 1.0443710  | 1.2989190  |
| H | 3.4359340 | 0.8076000  | 0.8495230  |
| O | 3.2053070 | 1.2504330  | -1.1738330 |
| H | 4.1602400 | 1.1751660  | -1.2556540 |
| O | 1.2993370 | 2.5708060  | -0.0118050 |
| H | 1.9404600 | 2.7584330  | -0.7128610 |

|                       |            |            |            |   |            |            |            |
|-----------------------|------------|------------|------------|---|------------|------------|------------|
| C                     | 2.6168110  | -1.6592550 | 1.1032690  | H | 2.4540670  | 1.2738690  | 1.3969270  |
| H                     | 2.2904230  | -2.6893750 | 0.9188660  | H | 1.8992790  | -2.2831230 | 0.6597410  |
| H                     | 1.9693450  | -1.2235340 | 1.8763530  | H | 4.2246830  | -1.6068520 | -0.6309300 |
| O                     | 3.9782360  | -1.5907640 | 1.4555350  | H | 3.4165460  | 0.5577390  | -1.3917120 |
| H                     | 4.1473340  | -2.1125790 | 2.2438070  | O | 4.6524970  | 1.2132830  | 0.0560220  |
| H                     | 0.0095300  | -2.0738120 | -1.1376820 | H | 4.9119260  | 0.9299660  | 0.9410910  |
| H                     | 0.5829670  | 0.7647900  | -1.6945260 | O | 4.1509150  | -1.0487080 | 1.3749640  |
| C                     | -3.6013290 | -0.2938430 | 0.3211130  | H | 4.2876890  | -1.9527240 | 1.6668510  |
| N                     | -3.1042440 | 0.9172010  | 0.5510980  | O | 1.6967010  | -1.5994070 | -1.2910750 |
| C                     | -1.8357060 | 1.1677300  | 0.2227400  | H | -5.5061110 | -1.8594550 | 1.0887630  |
| C                     | -0.9790750 | 0.1437300  | -0.3272140 | C | 1.4140880  | 1.8943620  | -0.3793520 |
| C                     | -1.6814080 | -1.0186270 | -0.5565600 | H | 1.1845350  | 1.4698030  | -1.3673250 |
| N                     | -2.9295110 | -1.3054370 | -0.2691770 | H | 1.9985550  | 2.8068600  | -0.5179660 |
| N                     | -4.8679490 | -0.5351020 | 0.6922380  | O | 0.2348980  | 2.2490110  | 0.3090270  |
| H                     | -5.4104970 | 0.2069660  | 1.1017940  | H | -0.2335000 | 1.4290660  | 0.5219580  |
| H                     | -5.2886080 | -1.4275320 | 0.4976090  | C | -4.1224370 | -0.5034530 | 0.4956950  |
| N                     | -1.4176700 | 2.4198190  | 0.4369960  | N | -3.9665510 | 0.8090390  | 0.3139990  |
| H                     | -2.0984750 | 3.0590850  | 0.8188570  | C | -2.8447150 | 1.1801990  | -0.3152020 |
| H                     | -0.4981870 | 2.7623650  | 0.1824220  | C | -1.8995410 | 0.2545880  | -0.7664120 |
| N                     | -1.0257790 | -2.1662410 | -1.2400070 | C | -2.1800230 | -1.0899130 | -0.5040780 |
| H                     | -1.2880090 | -2.1725550 | -2.2294710 | N | -3.2894210 | -1.4815940 | 0.1334240  |
| H                     | -1.3855180 | -3.0279390 | -0.8209370 | H | -1.0366610 | 0.5473420  | -1.3494040 |
| <b>oINT1</b>          |            |            |            | N | -5.2497500 | -0.8896950 | 1.1704850  |
| H = -1002.751185 a.u. |            |            |            | H | -5.9896470 | -0.2093890 | 1.2229410  |
| G = -1002.820414 a.u. |            |            |            | H | 2.1266330  | -2.3740260 | -1.6678290 |
| C                     | 2.2316300  | 0.8872020  | 0.3976430  | N | -2.6776750 | 2.5246370  | -0.5233040 |
| O                     | 1.4548090  | -0.3146930 | 0.5595120  | H | -3.3057170 | 3.1008080  | 0.0169340  |
| C                     | 2.1389790  | -1.4070100 | 0.0478560  | H | -1.7224550 | 2.8540850  | -0.5702590 |
| C                     | 3.6187930  | -1.0198040 | 0.0663620  | N | -1.3382580 | -2.0784250 | -0.9248570 |
| C                     | 3.5302930  | 0.4641120  | -0.3091810 | H | -1.5192610 | -2.9902470 | -0.5365110 |

H -0.3799300 -1.8390540 -1.1390790

**oTS1\_2**

H = -1002.662664 a.u.

G = -1002.730046 a.u.

C -1.6971540 0.9651600 -0.7102000

O -0.6892700 -0.0927600 -0.4464760

C -1.1865730 -1.0917150 0.1172530

C -2.6930900 -1.0895580 0.1058060

C -3.0127710 0.4060190 -0.1366420

H -1.7203890 1.0586910 -1.7971060

H -0.4978540 -1.9023750 0.3536890

H -3.1330760 -1.5007220 1.0095170

H -3.2230740 0.8843690 0.8176680

O -4.1102670 0.6080710 -0.9744560

H -4.0973780 -0.0726950 -1.6582090

O -3.0518440 -1.8000010 -1.0689750

H -3.2842230 -2.7086660 -0.8610040

O -1.4502290 0.0047580 2.2518850

H 2.8433210 -3.1115720 -1.3932140

C -1.1682970 2.2282730 -0.0590480

H -1.0823300 2.0482400 1.0179840

H -1.9059800 3.0158440 -0.2351540

O 0.0453080 2.6308370 -0.6342760

H 0.7237870 2.0041480 -0.3424000

C 2.6166990 -1.2212730 -0.7253580

N 3.0914600 0.0051080 -0.9515210

C 2.7780670 0.9173920 -0.0159460

C 1.9796550 0.6317720 1.0847110

C 1.5679170 -0.7184380 1.2549130

N 1.8881100 -1.6453620 0.3038910

H 1.7929090 1.3574730 1.8663140

N 2.8810320 -2.1545980 -1.7071740

H 3.6551720 -1.9171580 -2.3078100

H -1.9053490 -0.0122020 3.0976970

N 3.3195850 2.1679010 -0.2135300

H 3.6442020 2.3481630 -1.1507470

H 2.9072260 2.9486670 0.2710250

N 0.8127510 -1.0783620 2.2938320

H 0.7313090 -2.0929550 2.3004110

H -0.4551350 -0.3830820 2.4183060

**oINT2**

H = -1002.753790 a.u.

G = -1002.825769 a.u.

C -2.6690110 0.6811570 -0.1523570

O -1.2572960 0.7191250 -0.4064160

C -0.7878320 -0.5578880 -0.8177690

C -1.9992300 -1.5026560 -0.7669730

C -2.9453140 -0.7810540 0.2022060

H -3.2069680 0.9523190 -1.0700580

H -0.4065100 -0.4621910 -1.8424740

H -1.7366460 -2.5119270 -0.4360110

H -2.6338560 -0.9697230 1.2333050

O -4.2834520 -1.1678870 0.0775480

H -4.4753820 -1.2368350 -0.8650400

O -2.6779370 -1.5369600 -2.0094970

H -2.1980480 -2.0822510 -2.6367440

O -0.8747490 -0.2386920 2.7244790

H 4.4930050 -2.3211380 1.4487240

C -2.9890610 1.6692030 0.9452050

H -2.4424270 1.3853730 1.8504600

H -4.0614130 1.6328540 1.1474020  
 O -2.6853920 2.9939860 0.5495030  
 H -1.7383030 3.0308030 0.3885870  
 C 3.7505530 -0.7688700 0.3704680  
 N 4.1176040 0.3956540 -0.1716900  
 C 3.1318670 1.1449690 -0.6680290  
 C 1.7870750 0.7452170 -0.6401610  
 C 1.5486170 -0.4892790 -0.0521190  
 N 2.5123760 -1.2600230 0.4627090  
 H 0.9877150 1.3792950 -0.9954350  
 N 4.7556350 -1.5568620 0.8496920  
 H 5.6505470 -1.1192100 0.9906990  
 H -0.2393160 -0.2627750 3.4426920  
 N 3.4947990 2.3559340 -1.1789800  
 H 4.4797490 2.5046590 -1.3280910  
 H 2.8523190 2.8538600 -1.7706760  
 N 0.2646020 -1.0043230 0.0693770  
 H 0.2767720 -1.9891630 0.3047150  
 H -0.3517170 -0.2979890 1.9124320  
**oP<sub>N</sub>**  
 H = -926.343058 a.u.  
 G = -926.408055 a.u.  
 C -3.1608510 -0.7789010 0.8589310  
 N -1.8710810 -0.8816090 0.5235290  
 C -1.4774680 -0.1263350 -0.5003800  
 C -2.3431610 0.7273770 -1.1842800  
 C -3.6625250 0.7506990 -0.7284130  
 N -4.0831090 0.0046720 0.2972190  
 H -2.0176800 1.3250900 -2.0250220  
 N -3.5841210 -1.5825310 1.8758480

H -2.8756710 -2.0073430 2.4498770  
 H -4.4787970 -1.3725410 2.2846060  
 N -0.1589060 -0.2442290 -0.9053090  
 N -4.6153000 1.5245090 -1.3362430  
 H -5.4715790 1.6415960 -0.8176350  
 H -4.3136250 2.3093380 -1.8887770  
 C 2.7647290 0.5041610 0.5094620  
 O 1.3940890 0.2615730 0.8093700  
 C 0.8505300 -0.7697350 -0.0286140  
 C 2.0452490 -1.3365510 -0.7987820  
 C 2.9905570 -0.1294440 -0.8599350  
 H 3.4010300 0.0007030 1.2467150  
 H 0.3908680 -1.5301130 0.5973130  
 H 1.7432750 -1.7103060 -1.7822340  
 H 2.6801260 0.5618930 -1.6546400  
 O 4.3489720 -0.4939430 -1.0079480  
 H 4.5747340 -0.5355350 -1.9402790  
 O 2.6274410 -2.3559750 -0.0227310  
 H 3.5788960 -2.3368580 -0.1804970  
 H 0.1468460 0.4950000 -1.5230680  
 C 2.9985840 1.9987140 0.5592170  
 H 2.3835410 2.4781670 -0.2169030  
 H 4.0500310 2.2150650 0.3576220  
 O 2.6977210 2.5220340 1.8315140  
 H 1.8159680 2.2107440 2.0627270  
**pINT1**  
 H = -1002.753600 a.u.  
 G = -1002.823036 a.u.  
 C -2.2087810 0.8826310 -0.1050390  
 O -1.6942770 -0.2673620 -0.7755480

|   |            |            |            |                       |            |            |            |
|---|------------|------------|------------|-----------------------|------------|------------|------------|
| C | -2.6501060 | -1.3233250 | -0.7587520 | H                     | 6.3325220  | -0.8905300 | 0.4373620  |
| C | -3.7989900 | -0.8617930 | 0.1403580  | N                     | 2.8394850  | 2.4988890  | -0.6316790 |
| C | -3.1557800 | 0.2887780  | 0.9312480  | H                     | 1.8930350  | 2.8575300  | -0.5961890 |
| H | -2.7789030 | 1.4989380  | -0.8104200 | H                     | 3.5774230  | 3.1423640  | -0.4017460 |
| H | -3.0041320 | -1.4968800 | -1.7784830 | <b>pTS1_2</b>         |            |            |            |
| H | -4.1475600 | -1.6861690 | 0.7691880  | H = -1002.659963 a.u. |            |            |            |
| H | -2.5807610 | -0.1067830 | 1.7762910  | G = -1002.726351 a.u. |            |            |            |
| O | -4.1002530 | 1.2562230  | 1.3481490  | C                     | -2.2543910 | 1.0029890  | -0.3673100 |
| H | -4.3904980 | 1.0623460  | 2.2422960  | O                     | -1.2770060 | -0.0166200 | -0.8050190 |
| O | -4.8327640 | -0.3666690 | -0.6774400 | C                     | -1.6456020 | -1.1795920 | -0.5452950 |
| H | -5.2303670 | 0.3836630  | -0.2189990 | C                     | -3.0850930 | -1.2820220 | -0.1135920 |
| O | -2.0646730 | -2.4722800 | -0.2194590 | C                     | -3.4245680 | 0.2019400  | 0.2133720  |
| H | -1.4163130 | -2.8074250 | -0.8474460 | H                     | -2.5341670 | 1.5212210  | -1.2852200 |
| C | -1.0640380 | 1.6929900  | 0.4652000  | H                     | -0.9768920 | -1.9882660 | -0.8158620 |
| H | -0.4967350 | 1.0670000  | 1.1704980  | H                     | -3.2245650 | -1.9635860 | 0.7197270  |
| H | -1.4842430 | 2.5415730  | 1.0123760  | H                     | -3.4774970 | 0.3389360  | 1.2920960  |
| O | -0.2218230 | 2.1833000  | -0.5474710 | O                     | -4.6145100 | 0.6030610  | -0.4412480 |
| H | 0.3923030  | 1.4502380  | -0.7535070 | H                     | -5.3555400 | 0.5515370  | 0.1677120  |
| C | 2.0651720  | -0.8712330 | -0.0220560 | O                     | -3.7506600 | -1.7359380 | -1.2695300 |
| N | 3.2051860  | -1.4774060 | 0.3110460  | H                     | -4.3517270 | -1.0315130 | -1.5522120 |
| C | 4.2961470  | -0.7030970 | 0.3192740  | O                     | -1.4263100 | -0.8313710 | 1.9757400  |
| C | 4.2626520  | 0.6586920  | 0.0150970  | H                     | -1.4596560 | -1.1916710 | 2.8642050  |
| C | 3.0115980  | 1.1834770  | -0.3103460 | C                     | -1.5166690 | 1.9298350  | 0.5971790  |
| N | 1.9092850  | 0.4181250  | -0.3466430 | H                     | -1.3804200 | 1.4009020  | 1.5449860  |
| H | 5.1503760  | 1.2753900  | 0.0461030  | H                     | -2.1637240 | 2.7992200  | 0.7578380  |
| N | 0.9400530  | -1.6396470 | -0.0492860 | O                     | -0.3073610 | 2.3362940  | 0.0447330  |
| H | 0.9851040  | -2.5080210 | 0.4586130  | H                     | 0.3461730  | 1.5779170  | 0.1735490  |
| H | 0.0503250  | -1.1593290 | -0.1071170 | C                     | 1.7716830  | -0.8225420 | 0.4081450  |
| N | 5.4598320  | -1.3205600 | 0.6937770  | N                     | 2.9114300  | -1.5052610 | 0.1249930  |
| H | 5.4346160  | -2.3281290 | 0.6849110  | C                     | 3.9696110  | -0.8024660 | -0.2532520 |

|   |            |            |            |   |            |            |            |
|---|------------|------------|------------|---|------------|------------|------------|
| C | 3.9612650  | 0.5892110  | -0.3862400 | H | 0.0373730  | -1.0076920 | 3.3633950  |
| C | 2.7466910  | 1.2111420  | -0.1035870 | C | -1.3537040 | 1.9713090  | 0.6182700  |
| N | 1.6547070  | 0.5327040  | 0.2733960  | H | -0.7199440 | 1.3756460  | 1.2867240  |
| H | 4.8454000  | 1.1520720  | -0.6518960 | H | -2.0314200 | 2.5780980  | 1.2234090  |
| N | 0.7065300  | -1.5111810 | 0.8272730  | O | -0.5695670 | 2.8414450  | -0.1686050 |
| H | 0.9866790  | -2.4823740 | 0.9253730  | H | -0.0603320 | 2.2370990  | -0.7297210 |
| H | -0.4471130 | -1.0650210 | 1.5847010  | C | 1.2577950  | -0.6649390 | -0.1683510 |
| N | 5.1251650  | -1.5214980 | -0.4773610 | N | 2.2713150  | -1.5278660 | -0.1143210 |
| H | 4.9775330  | -2.5129960 | -0.5886960 | C | 3.4979510  | -0.9857770 | -0.0707590 |
| H | 5.8097690  | -1.1120260 | -1.0917280 | C | 3.7093840  | 0.3926090  | -0.0839460 |
| N | 2.6366690  | 2.5797620  | -0.1647370 | C | 2.5645330  | 1.1880680  | -0.1470500 |
| H | 1.7088900  | 2.9794780  | -0.1531390 | N | 1.3316700  | 0.6567970  | -0.1973600 |
| H | 3.3245580  | 3.0701070  | -0.7103100 | H | 4.7020160  | 0.8183970  | -0.0275000 |

**pINT2**

H = -1002.746159 a.u.

G = -1002.815602 a.u.

|   |            |            |            |
|---|------------|------------|------------|
| C | -2.1584400 | 1.0363430  | -0.2772170 |
| O | -1.2714120 | 0.4460190  | -1.2373740 |
| C | -1.1232370 | -0.9162390 | -1.0062480 |
| C | -2.4365530 | -1.3679310 | -0.3684030 |
| C | -2.8169950 | -0.1276300 | 0.4763060  |
| H | -2.9096950 | 1.5972300  | -0.8386680 |
| H | -0.9569430 | -1.3943840 | -1.9750830 |
| H | -2.3086340 | -2.2651160 | 0.2489000  |
| H | -2.4112890 | -0.2172770 | 1.4860080  |
| O | -4.2255110 | 0.0526460  | 0.5201100  |
| H | -4.5636220 | -0.3037120 | 1.3449160  |
| O | -3.3769270 | -1.5881560 | -1.3858640 |
| H | -4.2018620 | -1.1696380 | -1.1092370 |
| O | -0.7223630 | -0.9623170 | 2.7796260  |

|   |            |            |            |
|---|------------|------------|------------|
| H | 0.0373730  | -1.0076920 | 3.3633950  |
| C | -1.3537040 | 1.9713090  | 0.6182700  |
| H | -0.7199440 | 1.3756460  | 1.2867240  |
| H | -2.0314200 | 2.5780980  | 1.2234090  |
| O | -0.5695670 | 2.8414450  | -0.1686050 |
| H | -0.0603320 | 2.2370990  | -0.7297210 |
| C | 1.2577950  | -0.6649390 | -0.1683510 |
| N | 2.2713150  | -1.5278660 | -0.1143210 |
| C | 3.4979510  | -0.9857770 | -0.0707590 |
| C | 3.7093840  | 0.3926090  | -0.0839460 |
| C | 2.5645330  | 1.1880680  | -0.1470500 |
| N | 1.3316700  | 0.6567970  | -0.1973600 |
| H | 4.7020160  | 0.8183970  | -0.0275000 |
| N | -0.0152420 | -1.2479840 | -0.0728620 |
| H | 0.1118810  | -2.2561490 | -0.0594430 |
| H | -0.3686490 | -1.0309950 | 1.8780080  |
| N | 4.5355430  | -1.8710320 | 0.0277510  |
| H | 4.3099650  | -2.8317080 | -0.1776900 |
| H | 5.4592630  | -1.5603430 | -0.2222480 |
| N | 2.6149130  | 2.5490180  | -0.1711240 |
| H | 1.7510020  | 3.0366840  | 0.0332260  |
| H | 3.4753350  | 3.0093640  | 0.0716670  |

**pP<sub>N</sub>**

H = -926.342559 a.u.

G = -926.406637 a.u.

|   |            |            |            |
|---|------------|------------|------------|
| C | -1.6027430 | 0.0187670  | -0.4500870 |
| N | -2.0215080 | -0.9811270 | 0.3192520  |
| C | -3.3000460 | -0.9197250 | 0.7086000  |
| C | -4.1523400 | 0.1175510  | 0.3301340  |
| C | -3.5870870 | 1.1045370  | -0.4785310 |

N -2.3100470 1.0707190 -0.8704670  
H -5.1849360 0.1582180 0.6490180  
N -0.3028980 -0.0286250 -0.9050800  
H -0.0083710 0.8416870 -1.3269710  
N -3.7184770 -1.9256130 1.5372250  
H -3.1089790 -2.7266730 1.5888910  
H -4.7053940 -2.1008620 1.6214190  
N -4.3300110 2.1576040 -0.9459180  
H -3.7981020 2.9230390 -1.3291890  
H -5.1734980 2.4006700 -0.4540290  
C 2.5506760 0.1125190 0.8204610  
O 1.1762380 -0.1946190 0.9386160  
C 0.6971010 -0.8274690 -0.2639020  
C 1.9295870 -1.0112100 -1.1545910  
C 2.8306090 0.1290370 -0.6836940  
H 3.1668810 -0.6702950 1.2810080  
H 0.2553550 -1.7839990 0.0047500  
H 1.6703760 -0.9508330 -2.2154320  
H 2.4875470 1.0818840 -1.1137220  
O 4.1680520 -0.1279480 -1.0320660  
H 4.7177410 0.4689040 -0.5096420  
O 2.5212350 -2.2511770 -0.8433360  
H 3.4625730 -2.1702960 -1.0391400  
C 2.8361830 1.4439850 1.4814530  
H 2.6852020 1.3785760 2.5628350  
H 2.1587480 2.2011270 1.0702370  
O 4.1945960 1.7409040 1.1629420  
H 4.4628380 2.5529200 1.5965860

**oINT1<sub>H2O</sub>**

H = -1079.160996 a.u.

G = -1079.236743 a.u.

C 1.8293900 -0.6282570 -0.2939290  
O 0.5295810 -0.0389680 -0.2461350  
C 0.6086080 1.3349660 -0.0011530  
C 2.0683310 1.7318030 -0.2209770  
C 2.7734170 0.4571130 0.2448820  
H 2.0857120 -0.8497420 -1.3365160  
H -0.0977020 1.8456580 -0.6652260  
H 2.3418730 2.6201440 0.3524940  
H 2.7826430 0.4328390 1.3381250  
O 4.1034510 0.3226490 -0.1828050  
H 4.1342320 0.5817860 -1.1121850  
O 2.3868700 1.8619270 -1.5935770  
H 1.9782890 2.6521310 -1.9543130  
O 0.2763160 1.6223100 1.3509740  
H -1.8783790 -2.9868220 -2.4466060  
C 1.8457640 -1.9076730 0.5194980  
H 1.0794830 -2.5913840 0.1522230  
H 1.6097390 -1.6662170 1.5662450  
O 3.0971520 -2.5548570 0.4015430  
H 3.7985370 -1.8964530 0.4598230  
C -1.8697000 -1.8424770 -0.7736410  
N -1.6601750 -1.9258600 0.5451970  
C -1.9548310 -0.8244270 1.2328100  
C -2.5041210 0.3129880 0.6593960  
C -2.6345540 0.2861840 -0.7338300  
N -2.3358310 -0.7968900 -1.4572270  
H -2.7458330 1.1985800 1.2303860  
N -1.5192460 -2.9426790 -1.5073120  
H -1.4138160 -3.8060980 -1.0008170

H -0.1369490 0.8266610 1.7232210  
N -1.5668620 -0.8149400 2.5699540  
H -1.3617550 -1.7405980 2.9223740  
H -2.1586950 -0.2766130 3.1873320  
N -3.0840230 1.3876210 -1.4055140  
H -2.9520600 1.3589560 -2.4046190  
H -2.9398770 2.2797560 -0.9489300  
O -1.7747650 3.4057300 0.5217480  
H -1.7889550 4.2864150 0.9008570  
H -1.0961980 2.9085940 1.0081290

**oTS1\_2H2O**

H = -1079.071102 a.u.

G = -1079.144865 a.u.

C -1.4500370 -1.0292810 -0.5105220  
O -0.3981390 -0.5121820 0.3831590  
C -0.8324260 0.3040580 1.2193400  
C -2.3350720 0.3934770 1.2597620  
C -2.7523720 -0.3552700 -0.0381420  
H -1.4765720 -2.1046240 -0.3230930  
H -0.1049160 0.7423570 1.8993360  
H -2.6868350 1.4198830 1.3027250  
H -3.0844150 0.3559160 -0.7906200  
O -3.7917550 -1.2662020 0.1684220  
H -3.7426770 -1.5782000 1.0803930  
O -2.7149420 -0.3851060 2.3826700  
H -3.0072960 0.1796560 3.1021990  
O -1.4328060 2.2425240 -0.5209380  
H 2.7283420 -1.9985810 2.8888310  
C -1.0080840 -0.7045450 -1.9338190  
H -0.0987680 -1.2556880 -2.1862190

H -0.7845760 0.3612860 -1.9890700  
O -2.0799620 -0.9695460 -2.8148360  
H -2.1148180 -1.9093940 -3.0087300  
C 2.3754980 -1.2589990 1.0463340  
N 2.4654030 -1.6204140 -0.2366630  
C 2.3438440 -0.6079330 -1.1159260  
C 2.1010670 0.6974460 -0.7452850  
C 1.9990090 0.9716420 0.6499510  
N 2.1685130 -0.0480620 1.5480820  
H 1.9889020 1.4990660 -1.4643880

N 2.4526880 -2.2928500 1.9645400  
H 2.9167110 -3.1173300 1.6155490  
H -1.9089360 2.4057100 -1.3395020  
N 2.4107490 -0.9892860 -2.4551510  
H 2.9167560 -1.8551700 -2.5804920  
H 2.7073370 -0.2602320 -3.0873500  
N 1.6532000 2.1777890 1.0788010  
H 1.7190450 2.2173180 2.0925520  
H 1.1696110 3.2286560 0.0754570  
O 0.6758570 3.7693640 -0.6682960  
H 0.7608430 4.7014840 -0.4625250  
H -0.6662060 2.8832640 -0.5539380

**oINT2H2O**

H = -1079.164993 a.u.

G = -1079.240694 a.u.

C -2.2575570 -1.2949380 -0.4895450  
O -0.8308180 -1.1477350 -0.3947010  
C -0.4811640 -0.4012180 0.7583670  
C -1.7752040 0.2569860 1.2274700  
C -2.8292080 -0.7692000 0.8213130



H -2.4891230 -2.3613900 -0.5736060  
H -0.0933390 -1.0882110 1.5220160  
H -1.9432600 1.1833640 0.6735370  
H -3.8158050 -0.3176810 0.6929240  
O -2.8586060 -1.8350620 1.7499860  
H -2.7430130 -1.4543010 2.6286630  
O -1.7261250 0.4990810 2.6195050  
H -2.3027460 1.2412640 2.8212400  
O -3.8146620 2.1789590 -0.4120700  
H 4.5771060 2.8288110 0.4360560  
C -2.7046110 -0.5347610 -1.7368500  
H -2.2899140 -1.0272320 -2.6220560  
H -2.2990600 0.4759820 -1.7080370  
O -4.1152760 -0.4029110 -1.8315860  
H -4.5150480 -1.2552500 -2.0205520  
C 3.9846790 0.9095860 0.1256160  
N 4.4522650 -0.2730360 -0.2847860  
C 3.5421720 -1.2346800 -0.4472130  
C 2.1726200 -1.0302480 -0.2204010  
C 1.8258660 0.2465860 0.1925290  
N 2.7129940 1.2307650 0.3718820  
H 1.4357950 -1.8028680 -0.3846270  
N 4.9132950 1.8857950 0.3405760  
H 5.8345510 1.7333210 -0.0331630  
H -4.2399510 1.5263710 -0.9808830  
N 4.0173340 -2.4564240 -0.8250520  
H 4.9717770 -2.4880060 -1.1450240  
H 3.3779390 -3.1401550 -1.1921870  
N 0.4994210 0.6143240 0.4269620  
H 0.4692960 1.4047630 1.0657050

H -0.3731730 1.7827480 -0.9746390  
O -1.0349250 2.3824600 -1.3618610  
H -0.5457290 3.0236120 -1.8817740  
H -3.0057190 2.4378590 -0.8725620

**pINT<sub>1H2O</sub>**

H = -1079.168993 a.u.

G = -1079.241844 a.u.

C -2.0305080 -0.1371890 -1.1014400  
O -1.0120170 -0.6553520 -0.2470370  
C -1.4368180 -0.5194400 1.0891700  
C -2.9700110 -0.6778960 1.0644630  
C -3.3467820 -0.5455200 -0.4468440  
H -1.9045750 -0.6233430 -2.0701860  
H -0.9550710 -1.3159340 1.6616260  
H -3.4226910 0.1088490 1.6666410  
H -4.1260310 0.2080180 -0.6024920  
O -3.7433120 -1.7878430 -0.9913740  
H -4.5582760 -2.0595850 -0.5576790  
O -3.4062160 -1.8998550 1.6082070  
H -3.0510130 -2.6075070 1.0584820  
O -1.1172830 0.7369390 1.6224730  
H -0.1606360 0.7796130 1.8093210  
C -1.9217680 1.3798980 -1.2449740  
H -2.2830750 1.8648750 -0.3279020  
H -2.5644000 1.7035750 -2.0679290  
O -0.6090880 1.7902950 -1.5456210  
H 0.0309590 1.3770850 -0.9239580  
C 2.2318050 0.5578560 0.8031480  
N 3.1298150 -0.3435800 1.1834450  
C 3.5675550 -1.1687180 0.2203190

|                             |            |            |            |                            |            |            |            |
|-----------------------------|------------|------------|------------|----------------------------|------------|------------|------------|
| C                           | 3.1123190  | -1.0976320 | -1.0948670 | O                          | -3.1071540 | -2.2917950 | -1.2493920 |
| C                           | 2.1690110  | -0.1060310 | -1.3700070 | H                          | -3.5321350 | -1.7866050 | -1.9579290 |
| N                           | 1.7265000  | 0.7333950  | -0.4171680 | O                          | -2.4938530 | -0.1607750 | 2.2352000  |
| H                           | 3.4806820  | -1.7620310 | -1.8644120 | H                          | -2.7377310 | -0.6383520 | 3.0315930  |
| N                           | 1.7065090  | 1.3681410  | 1.7944470  | C                          | -1.6174350 | 1.9774400  | -0.0510740 |
| H                           | 2.2734820  | 1.3957150  | 2.6299460  | H                          | -1.8194420 | 1.7524620  | 1.0002720  |
| H                           | 1.3554260  | 2.2699990  | 1.4714900  | H                          | -2.2861330 | 2.7873550  | -0.3614680 |
| N                           | 4.5226200  | -2.0690980 | 0.6017080  | O                          | -0.3007930 | 2.3678300  | -0.2619730 |
| H                           | 4.6409270  | -2.1888220 | 1.5951580  | H                          | 0.3408640  | 1.6589050  | 0.0649870  |
| H                           | 4.6908540  | -2.8731490 | 0.0214250  | C                          | 1.8081460  | -0.6061840 | 0.7395230  |
| N                           | 1.6683860  | 0.0866630  | -2.6198450 | N                          | 2.8343820  | -1.4466910 | 0.4418040  |
| H                           | 0.8611900  | 0.6904890  | -2.7099110 | C                          | 3.7975520  | -0.9826330 | -0.3423940 |
| H                           | 1.7923710  | -0.6361180 | -3.3074810 | C                          | 3.7911100  | 0.3026940  | -0.8955300 |
| O                           | -0.1820780 | 3.4381680  | 0.8267350  | C                          | 2.6877210  | 1.0902130  | -0.5715240 |
| H                           | -0.2100320 | 3.3210120  | -0.1321230 | N                          | 1.7036570  | 0.6616780  | 0.2261270  |
| H                           | -0.8557720 | 2.8278180  | 1.1510070  | H                          | 4.6014550  | 0.6741310  | -1.5072250 |
| <b>pTS1_2<sub>H2O</sub></b> |            |            |            | N                          | 0.8340480  | -1.0085430 | 1.5563980  |
| H = -1079.073603 a.u.       |            |            |            | H                          | 1.1050780  | -1.9050400 | 1.9498530  |
| G = -1079.145646 a.u.       |            |            |            | H                          | 0.2458240  | 0.1771310  | 2.3630190  |
| C                           | -1.9846590 | 0.7586250  | -0.8927310 | N                          | 4.8564130  | -1.8354720 | -0.5685790 |
| O                           | -0.9343520 | -0.2466790 | -0.6425370 | H                          | 4.6739950  | -2.7970730 | -0.3256570 |
| C                           | -1.3737630 | -1.2973500 | -0.1338940 | H                          | 5.4013950  | -1.6885650 | -1.4020420 |
| C                           | -2.8781270 | -1.4044750 | -0.1797350 | N                          | 2.5865360  | 2.3817110  | -1.0369520 |
| C                           | -3.2979220 | 0.0567540  | -0.5257670 | H                          | 1.6698570  | 2.8067510  | -1.0052450 |
| H                           | -1.9170140 | 0.9682630  | -1.9605060 | H                          | 3.1453550  | 2.6167670  | -1.8402530 |
| H                           | -0.6505600 | -2.0663490 | 0.1158780  | O                          | -0.2516560 | 0.9719350  | 2.8093980  |
| H                           | -3.3090540 | -1.7810270 | 0.7415590  | H                          | 0.1888750  | 1.7704620  | 2.5079760  |
| H                           | -3.7492770 | 0.5229680  | 0.3491180  | H                          | -1.6860300 | 0.3651250  | 2.4992370  |
| O                           | -4.1521090 | 0.0810650  | -1.6540060 | <b>pINT2<sub>H2O</sub></b> |            |            |            |
| H                           | -5.0669720 | 0.1507760  | -1.3695020 | H = -1079.160322 a.u.      |            |            |            |

G = -1079.233523 a.u.

C -1.7094600 1.4665770 -0.4616310  
O -0.7309160 0.9398650 -1.3740380  
C -0.8305930 -0.4460000 -1.4911540  
C -2.2261280 -0.8100770 -0.9983700  
C -2.4442880 0.2487910 0.0981860  
H -2.3942840 2.0920210 -1.0410240  
H -0.6957940 -0.7012200 -2.5454770  
H -2.2760210 -1.8338690 -0.6096880  
H -1.9639890 -0.0731750 1.0259840  
O -3.8071840 0.5204790 0.3115480  
H -4.1040990 -0.1316390 0.9656440  
O -3.1421540 -0.6177340 -2.0453990  
H -3.9382240 -0.2391130 -1.6491960  
O -3.6350480 -1.6829570 2.0046030  
H -4.1404940 -2.4304080 2.3274160  
C -0.9940990 2.2880250 0.6059130  
H -0.5428190 1.6107510 1.3390260  
H -1.7130670 2.9375890 1.1087800  
O 0.0045930 3.1077430 0.0292890  
H 0.4703600 2.5206690 -0.5830940  
C 1.4429010 -0.6542190 -0.3615500  
N 2.4709340 -1.4637170 -0.6077770  
C 3.6716680 -1.0192020 -0.2040490  
C 3.8451310 0.2242020 0.4026920  
C 2.6889740 0.9843930 0.5889890  
N 1.4765350 0.5326690 0.2237100  
H 4.8174220 0.5717020 0.7248920  
N 0.1823450 -1.1883210 -0.6804540  
H 0.3425040 -2.0943060 -1.1118220

H -0.4786650 -1.8127190 1.0397360  
N 4.7188390 -1.8757630 -0.4019380  
H 4.5421540 -2.6454990 -1.0280220  
H 5.6543480 -1.5059240 -0.3911980  
N 2.7007450 2.2068130 1.1870980  
H 1.8616190 2.7684680 1.0851940  
H 3.5767640 2.6891850 1.2932110  
O -0.8860050 -2.1434850 1.8642190  
H -0.2582860 -1.9516900 2.5648250  
H -2.6961420 -1.9387960 2.0444130

**oINT3<sub>H2O</sub>**

H = -1079.151289 a.u.

G = -1079.230671 a.u.

C 3.4645990 -1.5440200 0.3561310  
N 2.4956480 -0.9755430 1.0759010  
C 2.3406410 0.3450660 0.9002310  
C 3.1238410 1.0814080 0.0068230  
C 4.0836960 0.3580530 -0.6963350  
N 4.2677700 -0.9576230 -0.5331660  
H 2.9765030 2.1440690 -0.1266780  
N 3.6712010 -2.8811720 0.5701980  
H 2.9277840 -3.3780960 1.0321470  
H 4.2016660 -3.3682340 -0.1326170  
N 1.3555920 0.9373990 1.6265130  
H 0.7638920 0.3546590 2.2002010  
H 1.0906470 1.8913320 1.4282760  
N 4.9340850 0.9727240 -1.5835970  
H 5.4196000 0.3466490 -2.2068610  
H 4.6393240 1.8502930 -1.9786410  
C -3.3872320 -0.9488500 -0.3723130

|                             |            |            |            |   |            |            |            |
|-----------------------------|------------|------------|------------|---|------------|------------|------------|
| O                           | -2.4036270 | -1.5634850 | -1.1816940 | N | 4.3914930  | 0.5304050  | -0.7970230 |
| C                           | -0.5036290 | 0.0457690  | -0.3319950 | H | 1.5979290  | 1.6023330  | 0.8043860  |
| C                           | -1.5656930 | 0.5254820  | 0.6350200  | N | 4.8887310  | -1.6131160 | -1.4493770 |
| C                           | -2.9730040 | 0.4736600  | 0.0283770  | H | 4.5519550  | -2.5286380 | -1.6941850 |
| H                           | -3.4534040 | -1.5558070 | 0.5335730  | H | 5.6718880  | -1.2262210 | -1.9476540 |
| H                           | 0.0270160  | -0.8798190 | -0.0594960 | N | 0.8138120  | -0.9661090 | 0.6327550  |
| H                           | -1.3549740 | 1.5831070  | 0.8433720  | H | 0.6751680  | -1.8720160 | 0.1780790  |
| H                           | -2.9798550 | 1.1204490  | -0.8628910 | H | 0.8479880  | -1.0391140 | 1.8020820  |
| O                           | -3.8097960 | 0.9936080  | 1.0430130  | N | 3.9386490  | 2.6621180  | -0.0923840 |
| H                           | -4.7268870 | 0.7896930  | 0.8174650  | H | 4.7594770  | 2.9383940  | -0.6062370 |
| O                           | -1.4933120 | -0.2491050 | 1.8090210  | H | 3.2693250  | 3.3704180  | 0.1548770  |
| H                           | -2.2544280 | -0.0038660 | 2.3489190  | C | -3.0779130 | 0.7835710  | -0.6121290 |
| O                           | -0.2588690 | 0.6600150  | -1.3461980 | O | -2.4086510 | 1.9377920  | -0.1505330 |
| H                           | -2.2522900 | -1.0310740 | -1.9712700 | C | -0.4456880 | -0.0908660 | 0.4608890  |
| C                           | -4.7196860 | -0.9884340 | -1.1150010 | C | -1.6106350 | -1.0715270 | 0.4338090  |
| H                           | -4.9611160 | -2.0312290 | -1.3390340 | C | -2.9836250 | -0.3774740 | 0.3913600  |
| H                           | -4.6175010 | -0.4389900 | -2.0613660 | H | -2.6670430 | 0.4542140  | -1.5777240 |
| O                           | -5.7208350 | -0.3915940 | -0.2992130 | H | -0.3421110 | 0.3819750  | -0.5257690 |
| H                           | -6.5738820 | -0.4364820 | -0.7359420 | H | -1.5855900 | -1.6709500 | 1.3566410  |
| O                           | 0.4838090  | 3.1469920  | -0.1457860 | H | -3.1938620 | 0.0307870  | 1.3881100  |
| H                           | 0.2667440  | 2.5043150  | -0.8363510 | O | -3.8853060 | -1.4363370 | 0.0981370  |
| H                           | 0.2309360  | 4.0082910  | -0.4825090 | H | -4.6082260 | -1.1080750 | -0.4539690 |
| <b>oTS3_4H<sub>2</sub>O</b> |            |            |            | O | -1.4201250 | -1.9008960 | -0.6935820 |
| H = -1079.134894 a.u.       |            |            |            | H | -2.2581650 | -2.3599840 | -0.8351830 |
| G = -1079.205686 a.u.       |            |            |            | O | -0.5310020 | 0.8096790  | 1.4726330  |
| C                           | 4.0103200  | -0.7469630 | -0.8798420 | H | -1.8004370 | 1.7251550  | 0.5824910  |
| N                           | 2.8548480  | -1.2662060 | -0.4422350 | C | -4.5158680 | 1.2455860  | -0.8315510 |
| C                           | 2.0416390  | -0.3968190 | 0.1422360  | H | -4.4786910 | 2.1743940  | -1.4059590 |
| C                           | 2.3034230  | 0.9426550  | 0.3178050  | H | -4.9781640 | 1.4494910  | 0.1418900  |
| C                           | 3.5426690  | 1.3677390  | -0.2018840 | O | -5.2392300 | 0.2370040  | -1.5382120 |

H -6.1292250 0.5464230 -1.7189170  
O 0.4622350 -0.6587300 3.0523130  
H -0.0875560 0.1748860 2.4977340  
H 1.1333170 -0.3166170 3.6469550

**oINT4<sub>H2O</sub>**

H = -1079.164097 a.u.

G = -1079.237490 a.u.

C 4.1520360 -0.4953870 -0.8453170  
N 2.9671370 -1.0824880 -0.6710340  
C 2.0322480 -0.3322830 -0.0784350  
C 2.2564010 0.9716180 0.3421730  
C 3.5395730 1.4741750 0.0829510  
N 4.4911840 0.7536460 -0.5124220  
H 1.5037910 1.5483210 0.8590110  
N 5.1343160 -1.2608780 -1.4073860  
H 4.8381990 -2.0984900 -1.8799990  
H 5.9400410 -0.7729360 -1.7611980  
N 0.8110140 -0.9740200 0.1171960  
H 0.6952790 -1.7387460 -0.5421400  
H 0.8952760 -1.9545480 1.9633150  
N 3.8903410 2.7379510 0.4658920  
H 4.7493690 3.0947410 0.0786590  
H 3.1622230 3.4038730 0.6616100  
C -3.1576100 0.9258470 -0.3652360  
O -2.4604860 1.9328900 0.3449650  
C -0.4007040 -0.1876400 0.2804920  
C -1.5916970 -1.0978570 0.0115940  
C -2.9683070 -0.4591970 0.2723310  
H -2.8095710 0.8908190 -1.4061490  
H -0.4099310 0.6529780 -0.4228560

H -1.5171010 -1.9668600 0.6837560  
H -3.1085160 -0.3484110 1.3565700  
O -3.8772640 -1.4268970 -0.2302480  
H -4.6496210 -0.9884290 -0.6126630  
O -1.4816300 -1.5093070 -1.3327030  
H -2.3121180 -1.9538970 -1.5448590  
O -0.4875490 0.3891530 1.5667240  
H -1.8989590 1.5466540 1.0310460  
C -4.6132270 1.3858950 -0.3531100  
H -4.6285050 2.4344870 -0.6603720  
H -5.0061570 1.3112990 0.6683490  
O -5.3725240 0.5783250 -1.2516410  
H -6.2728900 0.9064030 -1.2998230  
O 0.3821750 -1.9414240 2.7863640  
H -0.3255650 -0.3023880 2.2331930  
H 0.9827510 -2.1772960 3.4964780

**oINT5<sub>H2O</sub>**

H = -1079.16142 a.u.

G = -1079.234039 a.u.

C 4.1520360 -0.4953870 -0.8453170  
N 2.9671370 -1.0824880 -0.6710340  
C 2.0322480 -0.3322830 -0.0784350  
C 2.2564010 0.9716180 0.3421730  
C 3.5395730 1.4741750 0.0829510  
N 4.4911840 0.7536460 -0.5124220  
H 1.5037910 1.5483210 0.8590110  
N 5.1343160 -1.2608780 -1.4073860  
H 4.8381990 -2.0984900 -1.8799990  
H 5.9400410 -0.7729360 -1.7611980  
N 0.8110140 -0.9740200 0.1171960

|                             |            |            |            |                       |            |            |            |
|-----------------------------|------------|------------|------------|-----------------------|------------|------------|------------|
| H                           | 0.6952790  | -1.7387460 | -0.5421400 | G = -1079.183923 a.u. |            |            |            |
| H                           | 0.8952760  | -1.9545480 | 1.9633150  | C                     | 3.8200280  | -1.0222970 | -0.0871620 |
| N                           | 3.8903410  | 2.7379510  | 0.4658920  | N                     | 2.4886460  | -1.0212260 | -0.0373750 |
| H                           | 4.7493690  | 3.0947410  | 0.0786590  | C                     | 1.8978510  | 0.1673430  | 0.1858570  |
| H                           | 3.1622230  | 3.4038730  | 0.6616100  | C                     | 2.6620930  | 1.3334890  | 0.3499420  |
| C                           | -3.1576100 | 0.9258470  | -0.3652360 | C                     | 4.0436890  | 1.1959350  | 0.2678910  |
| O                           | -2.4604860 | 1.9328900  | 0.3449650  | N                     | 4.6427710  | 0.0202250  | 0.0380250  |
| C                           | -0.4007040 | -0.1876400 | 0.2804920  | H                     | 2.1870440  | 2.2780630  | 0.5782020  |
| C                           | -1.5916970 | -1.0978570 | 0.0115940  | N                     | 4.4203770  | -2.2444040 | -0.2647810 |
| C                           | -2.9683070 | -0.4591970 | 0.2723310  | H                     | 3.8336680  | -2.9734310 | -0.6351070 |
| H                           | -2.8095710 | 0.8908190  | -1.4061490 | H                     | 5.3808690  | -2.2219470 | -0.5654630 |
| H                           | -0.4099310 | 0.6529780  | -0.4228560 | N                     | 0.5316070  | 0.2684910  | 0.2656750  |
| H                           | -1.5171010 | -1.9668600 | 0.6837560  | H                     | 0.0100050  | 1.3491860  | -0.5651330 |
| H                           | -3.1085160 | -0.3484110 | 1.3565700  | H                     | -0.6615010 | 0.3422800  | -1.7140840 |
| O                           | -3.8772640 | -1.4268970 | -0.2302480 | N                     | 4.8883590  | 2.2644820  | 0.4591520  |
| H                           | -4.6496210 | -0.9884290 | -0.6126630 | H                     | 5.8364530  | 2.1149390  | 0.1510720  |
| O                           | -1.4816300 | -1.5093070 | -1.3327030 | H                     | 4.5156020  | 3.1879410  | 0.3141950  |
| H                           | -2.3121180 | -1.9538970 | -1.5448590 | C                     | -3.6317700 | -0.2677890 | -0.1570720 |
| O                           | -0.4875490 | 0.3891530  | 1.5667240  | O                     | -3.2879540 | -1.1237980 | -1.2519580 |
| H                           | -1.8989590 | 1.5466540  | 1.0310460  | C                     | -0.2054440 | -0.8655760 | -0.0293240 |
| C                           | -4.6132270 | 1.3858950  | -0.3531100 | C                     | -1.4091010 | -1.0427460 | 0.8947350  |
| H                           | -4.6285050 | 2.4344870  | -0.6603720 | C                     | -2.4608240 | 0.0637910  | 0.8016680  |
| H                           | -5.0061570 | 1.3112990  | 0.6683490  | H                     | -4.4042760 | -0.7552580 | 0.4453470  |
| O                           | -5.3725240 | 0.5783250  | -1.2516410 | H                     | 0.3629420  | -1.7901520 | -0.1080750 |
| H                           | -6.2728900 | 0.9064030  | -1.2998230 | H                     | -0.9783830 | -0.9776520 | 1.8965180  |
| O                           | 0.3821750  | -1.9414240 | 2.7863640  | H                     | -1.9629150 | 0.9844780  | 0.4748180  |
| H                           | -0.3255650 | -0.3023880 | 2.2331930  | O                     | -2.9881260 | 0.2417620  | 2.1045590  |
| H                           | 0.9827510  | -2.1772960 | 3.4964780  | H                     | -3.6013250 | 0.9851400  | 2.0590980  |
| <b>oTS5_6<sub>H2O</sub></b> |            |            |            | O                     | -1.9893060 | -2.3403300 | 0.7013320  |
| H = -1079.113015 a.u.       |            |            |            | H                     | -2.2385640 | -2.6965630 | 1.5569400  |

O -0.7509720 -0.6950240 -1.5205620  
H -3.1940130 -2.0108330 -0.8754370  
C -4.1898280 1.0056440 -0.7667630  
H -5.0756220 0.7760380 -1.3660360  
H -3.4207970 1.4545470 -1.4072570  
O -4.5087770 1.8616070 0.3231620  
H -4.6676480 2.7509470 0.0011650  
O -0.5098600 1.7391650 -1.4399390  
H -1.7221860 -0.9155340 -1.5813820  
H 0.1181220 2.2310220 -1.9756460

**oINT6<sub>H2O</sub>**

H = -1079.15336 a.u.

G = -1079.231563 a.u.

C -3.2990890 -1.0341860 0.6811270  
N -2.0301310 -1.0930780 0.2719920  
C -1.6667520 -0.1565040 -0.5997020  
C -2.5239880 0.8107380 -1.0847730  
C -3.8392630 0.7630680 -0.5897950  
N -4.2255950 -0.1487310 0.2974390  
H -2.1978150 1.5453930 -1.8074390  
N -3.7049750 -1.9918640 1.5644910  
H -2.9754960 -2.4758160 2.0618210  
H -4.5647660 -1.8096580 2.0554570  
N -0.3147740 -0.1142150 -1.0412400  
H 0.2471810 1.7207610 -0.9217140  
H -0.0651400 1.8043620 1.2566230  
N -4.7934570 1.6389160 -1.0214770  
H -5.6431900 1.6676650 -0.4801510  
H -4.5029420 2.4951690 -1.4617980  
C 2.8790280 -0.3158930 0.7838350

O 1.7480620 -0.8555300 1.4455130  
C 0.3678620 -1.1770760 -0.9237520  
C 1.8130530 -1.2426070 -1.3267510  
C 2.6669230 -0.1286790 -0.7338590  
H 3.7429700 -0.9791170 0.9104730  
H -0.0720770 -2.1025130 -0.5414550  
H 1.8664760 -1.1473440 -2.4192800  
H 2.1870660 0.8353460 -0.9302180  
O 3.9152410 -0.2092120 -1.4020340  
H 4.4828360 0.4637430 -1.0044790  
O 2.2999010 -2.5122020 -0.9168930  
H 3.2232170 -2.5612290 -1.1887750  
O -0.2860240 1.2547680 2.0187900  
H 1.7113960 -1.7984610 1.2474340  
C 3.1769060 1.0221480 1.4386670  
H 3.4221340 0.8757350 2.4942020  
H 2.2930350 1.6622540 1.3570940  
O 4.2799210 1.5810410 0.7264320  
H 4.3234650 2.5235100 0.8980600  
O 0.5749970 2.5284810 -0.4828960  
H 0.1920180 0.4299460 1.8698760  
H 0.1072950 3.2682440 -0.8754230

**oINT7<sub>H2O</sub>**

H = -1002.740302 a.u.

G = -1002.813354 a.u.

C -3.2178660 0.4188960 1.2603270  
N -1.9836030 -0.0498620 1.0615700  
C -1.7387030 -0.5284670 -0.1562590  
C -2.6798040 -0.5459070 -1.1694950  
C -3.9463460 -0.0280720 -0.8394840

|   |            |            |            |                             |            |            |            |
|---|------------|------------|------------|-----------------------------|------------|------------|------------|
| N | -4.2147570 | 0.4644290  | 0.3674160  | H                           | -0.0997450 | 1.6761530  | -2.4483860 |
| H | -2.4512640 | -0.9647080 | -2.1395520 | <b>oTS7_8H<sub>2</sub>O</b> |            |            |            |
| N | -3.5005940 | 0.8840890  | 2.5072280  | H = -1002.701882 a.u.       |            |            |            |
| H | -2.7245410 | 1.0519900  | 3.1250080  | G = -1002.769247 a.u.       |            |            |            |
| H | -4.3464540 | 1.4147010  | 2.6266430  | C                           | 3.3122600  | 0.9483020  | 0.8563290  |
| N | -0.4474200 | -1.0313690 | -0.4699930 | N                           | 2.0501890  | 1.0530510  | 0.4294790  |
| N | -4.9685590 | -0.0282000 | -1.7382420 | C                           | 1.6786190  | 0.1618600  | -0.4858340 |
| H | -5.8004840 | 0.4818770  | -1.4901760 | C                           | 2.5224290  | -0.8189030 | -0.9825270 |
| H | -4.7858250 | -0.2012300 | -2.7109670 | C                           | 3.8192140  | -0.8319690 | -0.4489230 |
| C | 2.8947820  | 0.5112740  | 0.3144820  | N                           | 4.2182080  | 0.0428470  | 0.4744770  |
| O | 1.6648320  | 1.1515670  | 0.6054320  | H                           | 2.1999010  | -1.5109510 | -1.7479290 |
| C | 0.3548260  | -1.2399320 | 0.4955260  | N                           | 3.7279700  | 1.8773380  | 1.7606900  |
| C | 1.7352360  | -1.7711160 | 0.2356790  | H                           | 3.0230050  | 2.4351680  | 2.2115030  |
| C | 2.6677390  | -0.7740860 | -0.4779230 | H                           | 4.5958490  | 1.7045750  | 2.2384160  |
| H | 3.3397640  | 0.2613430  | 1.2815630  | N                           | 0.3699990  | 0.2277050  | -0.9981040 |
| H | 0.0779730  | -1.0723930 | 1.5378950  | N                           | 4.7547120  | -1.7289780 | -0.8765670 |
| H | 1.6283390  | -2.6380920 | -0.4341000 | H                           | 5.5944600  | -1.7956310 | -0.3239590 |
| H | 2.2452600  | -0.5280400 | -1.4590890 | H                           | 4.4552950  | -2.5546510 | -1.3660100 |
| O | 3.9428420  | -1.3958930 | -0.6159040 | C                           | -2.7771730 | -0.2022080 | 0.6439900  |
| H | 3.9367730  | -1.9711920 | -1.3851080 | O                           | -1.3870410 | -0.4300190 | 0.8155620  |
| O | 2.2825650  | -2.1662440 | 1.4711420  | C                           | -0.5463220 | 0.9241750  | -0.3420790 |
| H | 3.2184590  | -2.3444040 | 1.3232920  | C                           | -1.8447520 | 1.3230700  | -1.0133010 |
| H | 0.1128590  | 0.2689810  | -1.8417640 | C                           | -2.9310640 | 0.2501460  | -0.8033590 |
| C | 3.8134170  | 1.4749870  | -0.4254190 | H                           | -3.0778310 | 0.6070560  | 1.3167200  |
| H | 3.3650510  | 1.7052300  | -1.4040920 | H                           | -0.2126090 | 1.5890100  | 0.4489670  |
| H | 4.7913910  | 1.0217160  | -0.5846460 | H                           | -1.6479490 | 1.4660540  | -2.0823430 |
| O | 4.0056610  | 2.6509310  | 0.3307940  | H                           | -2.7505670 | -0.5977390 | -1.4708310 |
| H | 3.1434490  | 2.8987770  | 0.6817990  | O                           | -4.2147660 | 0.8162830  | -1.0054490 |
| O | 0.5582210  | 1.1112780  | -2.0367140 | H                           | -4.5454250 | 0.5740600  | -1.8728530 |
| H | 1.2208830  | 1.3471060  | -0.2367790 | O                           | -2.2485060 | 2.5317680  | -0.4124200 |



|   |            |            |            |   |           |            |            |
|---|------------|------------|------------|---|-----------|------------|------------|
| H | -3.1969430 | 2.6211470  | -0.5679020 | C | 2.0153850 | -0.9920170 | -1.3064750 |
| H | -0.0671540 | -0.8234240 | -1.2972550 | C | 3.0412500 | 0.0041810  | -0.7328400 |
| C | -3.5619420 | -1.4587900 | 0.9744170  | H | 2.9290710 | -0.8806750 | 1.2285800  |
| H | -3.2380680 | -2.2660330 | 0.3035220  | H | 0.4444590 | -1.7113800 | 0.0078910  |
| H | -4.6259120 | -1.2732720 | 0.8169260  | H | 1.7911610 | -0.8112470 | -2.3628800 |
| O | -3.3965360 | -1.8211220 | 2.3285490  | H | 2.9022810 | 0.9952530  | -1.1779810 |
| H | -2.4519080 | -1.8129750 | 2.5133500  | O | 4.3715800 | -0.4565830 | -0.8771010 |
| O | -0.8113730 | -1.9031450 | -1.0058790 | H | 4.8023830 | 0.0153950  | -1.5926470 |
| H | -1.1173510 | -1.2524180 | 0.1218040  | O | 2.4636590 | -2.3120200 | -1.1105340 |
| H | -0.3461770 | -2.7379460 | -0.9271420 | H | 3.4232120 | -2.3077350 | -1.2137380 |

**oINT8<sub>H2O</sub>**

H = -1002.754739 a.u.

G = -1002.826183 a.u.

|   |            |            |            |
|---|------------|------------|------------|
| C | -3.0990570 | -1.0192560 | 0.8622030  |
| N | -1.8497900 | -1.0362320 | 0.3879340  |
| C | -1.5910540 | -0.1662550 | -0.5874310 |
| C | -2.5468490 | 0.7219840  | -1.0822140 |
| C | -3.8102270 | 0.6462550  | -0.4925150 |
| N | -4.0968340 | -0.2166360 | 0.4870580  |
| H | -2.3250980 | 1.4105130  | -1.8862990 |
| N | -3.3901100 | -1.9399500 | 1.8255570  |
| H | -2.6138210 | -2.3974220 | 2.2727870  |
| H | -4.2419460 | -1.8087190 | 2.3438870  |
| N | -0.3208160 | -0.1825340 | -1.1353290 |
| N | -4.8444490 | 1.4392060  | -0.9122850 |
| H | -5.6474020 | 1.4673250  | -0.3040590 |
| H | -4.6322040 | 2.2781360  | -1.4249550 |
| C | 2.6239170  | 0.0493230  | 0.7311250  |
| O | 1.2025640  | 0.1164960  | 0.6425340  |
| C | 0.7679670  | -0.7687740 | -0.4291110 |

|   |            |           |            |
|---|------------|-----------|------------|
| H | -0.0881760 | 0.6487760 | -1.6658010 |
| C | 3.1100150  | 1.2406700 | 1.5218600  |
| H | 2.8143760  | 2.1623380 | 1.0025830  |
| H | 4.1994250  | 1.2109380 | 1.5843180  |
| O | 2.6139470  | 1.2164890 | 2.8439990  |
| H | 1.6677440  | 1.0466720 | 2.7942330  |
| O | 0.8320870  | 2.5215860 | -0.8088280 |
| H | 0.7470740  | 1.9124260 | -0.0593500 |
| H | 0.4026700  | 3.3380210 | -0.5452790 |

**oINT3<sub>2H2O</sub>**

H = -1155.569229 a.u.

G = -1155.653698 a.u.

|   |           |            |            |
|---|-----------|------------|------------|
| C | 3.7531500 | 0.6788390  | -0.5199010 |
| N | 2.8183210 | 0.9347500  | 0.4000740  |
| C | 2.3678230 | -0.1243570 | 1.0954120  |
| C | 2.8385070 | -1.4191970 | 0.8575460  |
| C | 3.7988340 | -1.5498170 | -0.1451670 |
| N | 4.2638150 | -0.5086110 | -0.8453200 |
| H | 2.4953720 | -2.2642600 | 1.4390270  |
| N | 4.2563760 | 1.7561830  | -1.1887840 |

|   |            |            |            |                                         |            |            |            |
|---|------------|------------|------------|-----------------------------------------|------------|------------|------------|
| H | 3.7700510  | 2.6321680  | -1.1062300 | H                                       | -0.8084540 | 3.2528440  | -2.1525260 |
| H | 4.7967350  | 1.5725120  | -2.0165940 | O                                       | 0.7051950  | 2.8030720  | 0.9991890  |
| N | 1.4240130  | 0.1300080  | 2.0387580  | H                                       | 1.5096080  | 2.4158260  | 0.6141440  |
| H | 0.8742210  | -0.6241260 | 2.4186620  | H                                       | 0.1235290  | 3.0069580  | 0.2541500  |
| H | 1.0135730  | 1.0573860  | 2.0518300  | <b>oTS3_4<sub>2</sub>H<sub>2</sub>O</b> |            |            |            |
| N | 4.3551340  | -2.7643700 | -0.4467980 | H = -1155.554205 a.u.                   |            |            |            |
| H | 4.8730040  | -2.8008110 | -1.3104760 | G = -1155.630026 a.u.                   |            |            |            |
| H | 3.8595610  | -3.5982230 | -0.1801560 | C                                       | -4.0287350 | 0.2451760  | 0.4616660  |
| C | -3.4183740 | -1.1039150 | -0.3269890 | N                                       | -2.8856990 | 0.7834920  | 0.0111040  |
| O | -2.5000800 | -1.8138630 | -1.1378530 | C                                       | -2.0488650 | -0.0766880 | -0.5557560 |
| C | -0.4318000 | -0.4776720 | -0.2335310 | C                                       | -2.2991250 | -1.4217830 | -0.7143880 |
| C | -1.4331740 | 0.0841370  | 0.7491220  | C                                       | -3.5349290 | -1.8667880 | -0.2077730 |
| C | -2.8379790 | 0.2339450  | 0.1540510  | N                                       | -4.3921020 | -1.0365130 | 0.3834980  |
| H | -3.5947570 | -1.7339750 | 0.5476050  | H                                       | -1.5891570 | -2.0883150 | -1.1850210 |
| H | 0.0208240  | -1.4444050 | 0.0384310  | N                                       | -4.9221370 | 1.0986060  | 1.0318880  |
| H | -1.0936760 | 1.0945030  | 1.0157490  | H                                       | -4.5806960 | 1.9990980  | 1.3226960  |
| H | -2.7769120 | 0.9452110  | -0.6833900 | H                                       | -5.6836250 | 0.6870650  | 1.5452300  |
| O | -3.6048180 | 0.7653980  | 1.2171220  | N                                       | -0.8027100 | 0.4880190  | -1.0109860 |
| H | -4.5356440 | 0.7379460  | 0.9618210  | H                                       | -0.5654520 | 0.1340170  | -1.9403890 |
| O | -1.4554070 | -0.7630900 | 1.8788880  | H                                       | -0.9048250 | 1.7170570  | -0.9987970 |
| H | -2.1787970 | -0.4517400 | 2.4364970  | N                                       | -3.9212780 | -3.1645930 | -0.3205110 |
| O | -0.1274360 | 0.0940030  | -1.2554970 | H                                       | -4.7376990 | -3.4443320 | 0.1991250  |
| H | -2.2892110 | -1.2918650 | -1.9207030 | H                                       | -3.2425100 | -3.8704510 | -0.5480550 |
| C | -4.7188800 | -0.9264200 | -1.1047310 | C                                       | 3.0718500  | -0.9754060 | 0.6290390  |
| H | -5.1012670 | -1.9135350 | -1.3803320 | O                                       | 2.2669170  | -1.0503860 | 1.7856510  |
| H | -4.5067620 | -0.3602810 | -2.0226590 | C                                       | 0.3842120  | 0.1223500  | -0.0995200 |
| O | -5.6482940 | -0.2226980 | -0.2908550 | C                                       | 1.6210810  | 0.5450960  | -0.8843390 |
| H | -6.4721590 | -0.0953710 | -0.7656680 | C                                       | 2.9325230  | 0.3720120  | -0.1003640 |
| O | -0.9556670 | 2.7384410  | -1.3565280 | H                                       | 2.8244210  | -1.7847720 | -0.0739340 |
| H | -0.6190530 | 1.8441450  | -1.5352890 | H                                       | 0.3742150  | -0.9761470 | -0.0395780 |

|                                        |            |            |            |   |            |            |            |
|----------------------------------------|------------|------------|------------|---|------------|------------|------------|
| H                                      | 1.5484850  | 1.6107240  | -1.1424960 | H | 2.5467930  | 2.0439990  | -2.2943130 |
| H                                      | 2.9896270  | 1.1724120  | 0.6489730  | H | 4.2174020  | 1.7140520  | -2.4425150 |
| O                                      | 3.9330570  | 0.5581690  | -1.0938940 | N | 0.6490040  | -0.9474530 | 0.7247840  |
| H                                      | 4.7033470  | 0.0101750  | -0.8909380 | H | 0.4720990  | -1.8664940 | 1.1046120  |
| O                                      | 1.6225250  | -0.2445370 | -2.0605880 | H | 2.6394800  | 2.9545030  | 0.1850530  |
| H                                      | 2.4982170  | -0.1344750 | -2.4537400 | N | 5.2565030  | -2.0970360 | -0.0419480 |
| O                                      | 0.2638320  | 0.6823750  | 1.1215290  | H | 6.0234490  | -1.9156450 | -0.6696350 |
| H                                      | 1.5474390  | -0.3906970 | 1.7644270  | H | 5.1455060  | -3.0425830 | 0.2824800  |
| C                                      | 4.4873050  | -1.2074240 | 1.1521140  | C | -3.2833530 | 0.2170310  | -0.8799110 |
| H                                      | 4.4565380  | -2.0854930 | 1.8017930  | O | -2.5511280 | 1.3918250  | -1.1690010 |
| H                                      | 4.7940770  | -0.3381840 | 1.7460810  | C | -0.5243190 | -0.2261890 | 0.2911230  |
| O                                      | 5.3778810  | -1.4163480 | 0.0551220  | C | -1.7475830 | -0.9438250 | 0.8464590  |
| H                                      | 6.2577860  | -1.6048160 | 0.3877640  | C | -3.0884250 | -0.2350970 | 0.5760710  |
| O                                      | 0.7039600  | 3.0213260  | 0.8712690  | H | -2.9805610 | -0.5984450 | -1.5511780 |
| H                                      | 0.5094990  | 1.8675940  | 1.0972490  | H | -0.5680760 | -0.1978790 | -0.8019520 |
| H                                      | 0.6873180  | 3.5698090  | 1.6567090  | H | -1.6405320 | -1.0029460 | 1.9416110  |
| O                                      | -1.0144840 | 2.9695680  | -0.8263770 | H | -3.1512820 | 0.6588040  | 1.2105630  |
| H                                      | -1.8884590 | 3.0278680  | -0.4230660 | O | -4.0556600 | -1.1873900 | 0.9966850  |
| H                                      | -0.2724690 | 3.1581670  | -0.0447620 | H | -4.8279670 | -1.1537410 | 0.4153030  |
| <b>oINT4<sub>2</sub>H<sub>2</sub>O</b> |            |            |            | O | -1.7485520 | -2.2399650 | 0.2909370  |
| H = -1155.579426 a.u.                  |            |            |            | H | -2.6144940 | -2.6139840 | 0.4989110  |
| G = -1155.659066 a.u.                  |            |            |            | O | -0.5155040 | 1.1203360  | 0.7074990  |
| C                                      | 3.2257500  | 0.5153510  | -1.1546710 | H | -1.9036020 | 1.5813170  | -0.4748220 |
| N                                      | 2.0060070  | 0.3161520  | -0.6488890 | C | -4.7299720 | 0.5901600  | -1.1919730 |
| C                                      | 1.8706710  | -0.7605260 | 0.1357100  | H | -4.7415330 | 1.0615220  | -2.1778150 |
| C                                      | 2.9269650  | -1.6413140 | 0.3805800  | H | -5.0837300 | 1.3154890  | -0.4491730 |
| C                                      | 4.1402940  | -1.3299880 | -0.2285580 | O | -5.5363620 | -0.5877410 | -1.1783830 |
| N                                      | 4.3024880  | -0.2454850 | -1.0024870 | H | -6.4301350 | -0.3701340 | -1.4511010 |
| H                                      | 2.8130380  | -2.5019150 | 1.0251710  | O | 0.7997780  | 1.9595580  | 2.9311430  |
| N                                      | 3.3884470  | 1.6841880  | -1.8684490 | H | -0.2261750 | 1.2111400  | 1.6380070  |

H 0.5259610 2.5885210 3.6009290  
O 1.7579010 2.9649090 0.5712610  
H 1.3096790 2.2131620 0.1477260  
H 1.3135920 2.4628100 2.2709490

**oINT5<sub>2H2O</sub>**

H = -1155.583999 a.u.

G = -1155.664672 a.u.

C -3.4464050 -1.7259580 0.1553290  
N -2.2195740 -1.2060200 0.0790530  
C -2.1595660 0.0938340 -0.2305240  
C -3.3049280 0.8645630 -0.4547740  
C -4.5211370 0.1975760 -0.3464460  
N -4.6081390 -1.1024560 -0.0390950  
H -3.2398850 1.9116330 -0.7174610  
N -3.5220160 -3.0486270 0.5102820  
H -2.6782980 -3.5840850 0.3909380  
H -4.3955700 -3.5068870 0.3089690  
N -0.9212870 0.6636170 -0.3502220  
H -0.8752850 1.6716620 -0.4632060  
H 0.9368110 -0.6350330 1.7841280  
N -5.7148470 0.8324770 -0.5898610  
H -6.5299870 0.3436780 -0.2536440  
H -5.7366860 1.8353800 -0.5087150  
C 3.1444830 -1.2207710 0.0031010  
O 2.3765370 -1.7822070 1.0723550  
C 0.2622650 0.0018170 0.0726140  
C 1.4726730 0.6346450 -0.6173050  
C 2.8218030 0.2738390 0.0174240  
H 2.8407680 -1.6513080 -0.9577090  
H 0.1924650 -1.0537680 -0.1905010

H 1.3714090 1.7287750 -0.5486300  
H 2.8542580 0.6177600 1.0564290  
O 3.8419830 0.9379100 -0.7382480  
H 3.8345880 1.8711990 -0.5059860

O 1.4416490 0.2233500 -1.9653930

H 2.2091280 0.6045210 -2.4041440

O 0.3975250 0.1160240 1.4991810

H 2.3648000 -2.7388000 0.9838470

C 4.6310770 -1.5016200 0.2300680

H 4.7441060 -2.5513350 0.5142430

H 4.9923600 -0.8891080 1.0673400

O 5.4026150 -1.3142210 -0.9308130

H 5.2967420 -0.3920620 -1.1878630

O 1.1947650 2.6598910 2.0159860

H 0.8633050 1.7376610 1.9858190

H 1.1242780 2.9424550 2.9301740

O -0.2018280 3.5523280 -0.1964500

H 0.2608180 3.4710680 0.6560630

H -0.5566500 4.4414980 -0.2410540

**oTS5\_6<sub>2H2O</sub>**

H = -1155.539576 a.u.

G = -1155.615893 a.u.

C -3.4193680 -1.7021010 0.1409520

N -2.1978720 -1.1727620 0.0834250

C -2.1319180 0.1335600 -0.2280150

C -3.2889840 0.8840300 -0.4724230

C -4.5024300 0.2107930 -0.3774970

N -4.5850190 -1.0883110 -0.0654160

H -3.2282440 1.9235150 -0.7644130

N -3.4926200 -3.0292070 0.4935180

|   |            |            |            |                                        |            |            |            |
|---|------------|------------|------------|----------------------------------------|------------|------------|------------|
| H | -2.6458320 | -3.5579740 | 0.3645200  | H                                      | 0.8248520  | 2.8205020  | 2.7954180  |
| H | -4.3583540 | -3.4892570 | 0.2630440  | O                                      | -0.4113220 | 3.1555990  | 0.0721680  |
| N | -0.9120450 | 0.7539290  | -0.3211470 | H                                      | 0.3808210  | 2.8646810  | 1.2178710  |
| H | -0.7627060 | 2.0983000  | -0.1893390 | H                                      | -1.1475090 | 3.7670980  | 0.1278610  |
| H | 1.1805310  | -0.6032860 | 1.7373000  | <b>oINT6<sub>2</sub>H<sub>2</sub>O</b> |            |            |            |
| N | -5.6983890 | 0.8357120  | -0.6450750 | H = -1155.573617 a.u.                  |            |            |            |
| H | -6.5137790 | 0.3421780  | -0.3162310 | G = -1155.655190 a.u.                  |            |            |            |
| H | -5.7282960 | 1.8381880  | -0.5605550 | C                                      | -3.9536070 | -1.1782910 | -0.0088310 |
| C | 3.2187440  | -1.1047000 | 0.0421540  | N                                      | -2.6863890 | -1.2924150 | -0.4198310 |
| O | 2.4954320  | -1.6310960 | 1.1638560  | C                                      | -1.9856170 | -0.1591690 | -0.4118090 |
| C | 0.2062440  | 0.0246330  | -0.0582690 | C                                      | -2.4946550 | 1.0629590  | -0.0207860 |
| C | 1.4574350  | 0.6297090  | -0.7034720 | C                                      | -3.8349980 | 1.0483360  | 0.4038190  |
| C | 2.8181410  | 0.3693580  | -0.0371690 | N                                      | -4.5681360 | -0.0646620 | 0.4016840  |
| H | 2.9218200  | -1.6160600 | -0.8792850 | H                                      | -1.8770680 | 1.9505940  | 0.0115330  |
| H | 0.1268250  | -1.0499400 | -0.2229960 | N                                      | -4.6900600 | -2.3256490 | 0.0238370  |
| H | 1.3211230  | 1.7194340  | -0.7331030 | H                                      | -4.3262910 | -3.1174300 | -0.4791030 |
| H | 2.8387100  | 0.7875650  | 0.9757270  | H                                      | -5.6872230 | -2.2279080 | 0.1146230  |
| O | 3.8064840  | 1.0298790  | -0.8343910 | N                                      | -0.6339560 | -0.2068980 | -0.8398830 |
| H | 3.7532140  | 1.9758250  | -0.6691820 | H                                      | 0.0728780  | 1.1215190  | -1.7202230 |
| O | 1.4656880  | 0.0989120  | -2.0121240 | H                                      | 0.4649290  | 1.6644710  | 1.1606900  |
| H | 2.1830320  | 0.5204670  | -2.4961450 | N                                      | -4.4576990 | 2.1912870  | 0.8079330  |
| O | 0.4567190  | 0.0283530  | 1.5475880  | H                                      | -5.3440120 | 2.0787740  | 1.2736370  |
| H | 2.4898520  | -2.5913450 | 1.1283130  | H                                      | -3.8949270 | 2.9848100  | 1.0656430  |
| C | 4.7194750  | -1.2978500 | 0.2649450  | C                                      | 2.3616150  | -0.4976580 | 1.4129450  |
| H | 4.8860560  | -2.3179740 | 0.6208460  | O                                      | 1.0289000  | -0.1841460 | 1.8175420  |
| H | 5.0631070  | -0.6102590 | 1.0495070  | C                                      | 0.0593910  | -1.2135830 | -0.4983720 |
| O | 5.4610920  | -1.1575070 | -0.9206570 | C                                      | 1.5085060  | -1.2962170 | -0.8755460 |
| H | 5.3175470  | -0.2578850 | -1.2338410 | C                                      | 2.3818590  | -0.2913920 | -0.0973110 |
| O | 0.9944870  | 2.4060300  | 1.9464330  | H                                      | 2.5993120  | -1.5425060 | 1.6429830  |
| H | 0.6861680  | 1.0147630  | 1.8373340  | H                                      | -0.3577150 | -2.0363810 | 0.0859310  |

|                             |            |            |            |   |            |            |            |
|-----------------------------|------------|------------|------------|---|------------|------------|------------|
| H                           | 1.6043910  | -1.0330970 | -1.9390810 | H | -2.8391240 | 3.1513240  | -0.5376740 |
| H                           | 2.0253700  | 0.7249680  | -0.3055270 | H | -4.3953800 | 2.8816980  | 0.1740400  |
| O                           | 3.7191990  | -0.4451090 | -0.5390510 | N | -0.5182550 | -0.8878080 | -0.7776200 |
| H                           | 3.7825510  | 0.0373640  | -1.3834070 | N | -4.8544630 | -1.5995820 | 1.2481120  |
| O                           | 1.9451300  | -2.6151650 | -0.6446240 | H | -5.7574360 | -1.1895460 | 1.4197370  |
| H                           | 2.9003930  | -2.6205610 | -0.7768520 | H | -4.7486200 | -2.5963410 | 1.3100240  |
| O                           | 0.3916080  | 2.5683400  | 0.8264000  | C | 2.7743240  | 0.1873330  | 0.8967140  |
| H                           | 0.9112370  | -0.4279850 | 2.7396790  | O | 1.5151960  | 0.7110980  | 1.2776940  |
| C                           | 3.3711000  | 0.4098740  | 2.1193420  | C | 0.3081560  | -1.3656690 | 0.0583840  |
| H                           | 3.1185130  | 0.4509270  | 3.1827410  | C | 1.6898690  | -1.7563820 | -0.3782140 |
| H                           | 3.2837350  | 1.4290380  | 1.7177330  | C | 2.6580390  | -0.5548200 | -0.4315920 |
| O                           | 4.6855320  | -0.0846730 | 2.0342860  | H | 3.0682320  | -0.5122390 | 1.6849770  |
| H                           | 4.8775820  | -0.1951120 | 1.0957370  | H | 0.0749190  | -1.4949200 | 1.1182070  |
| O                           | 3.1440090  | 1.0420970  | -2.7613430 | H | 1.6212760  | -2.1576030 | -1.3995240 |
| H                           | 0.5886160  | 2.5079330  | -0.1159920 | H | 2.3117890  | 0.1364920  | -1.2069430 |
| H                           | 3.6527790  | 1.6845570  | -3.2593320 | O | 3.9472750  | -1.0693160 | -0.7513740 |
| O                           | 0.5980760  | 1.8874330  | -2.0801150 | H | 4.0331460  | -1.1317220 | -1.7063060 |
| H                           | 2.2611270  | 1.4320420  | -2.6145230 | O | 2.1605230  | -2.7361390 | 0.5167360  |
| H                           | 0.0162930  | 2.3629710  | -2.6785320 | H | 3.1126530  | -2.8070050 | 0.3774100  |
| <b>oINT7<sub>2H2O</sub></b> |            |            |            | H | 0.1888330  | -0.2050280 | -2.4171970 |
| H = -1079.160500 a.u.       |            |            |            | C | 3.7984560  | 1.3138870  | 0.8261400  |
| G = -1079.237060 a.u.       |            |            |            | H | 3.5178600  | 1.9958480  | 0.0082210  |
| C                           | -3.2746120 | 1.2123720  | -0.0968730 | H | 4.7920710  | 0.9152040  | 0.6238830  |
| N                           | -2.0648230 | 0.8110390  | -0.5093010 | O | 3.8558860  | 2.0019270  | 2.0556810  |
| C                           | -1.7836150 | -0.4806140 | -0.3099200 | H | 2.9446520  | 2.1453490  | 2.3341710  |
| C                           | -2.6662060 | -1.3714670 | 0.2656090  | O | 0.7856350  | 0.2880620  | -3.0139120 |
| C                           | -3.9093610 | -0.8324840 | 0.6516450  | H | 1.1917990  | 1.2987550  | 0.5635090  |
| N                           | -4.2142500 | 0.4523760  | 0.4701670  | H | 0.3710560  | 0.2901250  | -3.8790230 |
| H                           | -2.4185690 | -2.4152550 | 0.3953970  | O | 0.4536900  | 2.1608670  | -0.8551220 |
| N                           | -3.5860680 | 2.5194820  | -0.3011160 | H | -0.4601880 | 1.8254310  | -0.7832220 |

H 0.7401120 1.8359560 -1.7203490

**oTS7\_8<sub>2</sub>H<sub>2</sub>O**

H = -1079.127718 a.u.

G = -1079.198213 a.u.

C -3.0585430 -0.5711360 1.2115830

N -1.7928300 -0.7781280 0.8359580

C -1.5058800 -0.5088040 -0.4465590

C -2.4665820 -0.0112760 -1.3290190

C -3.7512520 0.1671300 -0.8113100

N -4.0590670 -0.1062410 0.4618380

H -2.2295290 0.1752030 -2.3670990

N -3.3482490 -0.8180760 2.5246080

H -2.6876430 -1.3814750 3.0335030

H -4.3225970 -0.8950140 2.7644160

N -0.2122700 -0.6884910 -0.9046600

N -4.7869080 0.5970670 -1.5956000

H -5.6172280 0.8899880 -1.1056300

H -4.5767040 1.0654280 -2.4604010

C 2.6871810 0.2683500 0.6020680

O 1.3038220 -0.0030750 0.9347160

C 0.6990620 -1.2067920 -0.0255960

C 2.0050740 -1.6959740 -0.6211740

C 2.9145820 -0.4668360 -0.7182170

H 3.2895220 -0.1833600 1.3921670

H 0.2985510 -1.8639500 0.7406000

H 1.8090600 -2.1404650 -1.6019770

H 2.6032260 0.1674720 -1.5540690

O 4.2788150 -0.8376150 -0.8114260

H 4.5703730 -0.7684580 -1.7228740

O 2.5647410 -2.6333900 0.2684450

H 3.5155290 -2.6502390 0.1060000

H 0.1668030 0.2990070 -1.5753620

C 2.9658360 1.7607910 0.4945420

H 2.4357890 2.1689100 -0.3727190

H 4.0400500 1.8632570 0.3178350

O 2.6502430 2.4605220 1.6736300

H 1.7177760 2.7001470 1.6225680

O 0.5654420 1.4327910 -1.8681020

H 0.6994830 0.8536060 0.8148610

H 0.2191920 1.7938550 -2.6856950

O 0.0444320 2.0818310 0.4521480

H -0.8963760 2.0587080 0.6548520

H 0.1631680 1.9832270 -0.5891810

**oINT8<sub>2</sub>H<sub>2</sub>O**

H = -1079.175877 a.u.

G = -1079.249876 a.u.

C -2.9694310 -0.6573780 1.1817450

N -1.7135450 -0.9269640 0.8096400

C -1.4212880 -0.6778800 -0.4706360

C -2.3575270 -0.1664720 -1.3705340

C -3.6306860 0.0733620 -0.8552000

N -3.9481100 -0.1608220 0.4251750

H -2.1039560 0.0266020 -2.4034600

N -3.2633620 -0.8653760 2.5002120

H -2.6228240 -1.4443020 3.0177570

H -4.2390120 -0.8996660 2.7450780

N -0.1347550 -0.9440970 -0.8904360

N -4.6482950 0.5363760 -1.6440390

H -5.4623300 0.8762110 -1.1571760

H -4.4205690 0.9767700 -2.5190260

|                             |              |            |            |   |            |            |            |
|-----------------------------|--------------|------------|------------|---|------------|------------|------------|
| C                           | 2.5944750    | 0.3372880  | 0.6085020  | C | -0.7065000 | 0.4396540  | 0.1880900  |
| O                           | 1.2410240    | -0.0619120 | 0.8387640  | C | -1.6473040 | 0.4412000  | -1.0047200 |
| C                           | 0.8932270    | -1.2335660 | 0.0674800  | C | -3.0500220 | 0.0481310  | -0.4988700 |
| C                           | 2.1909450    | -1.6624300 | -0.6146050 | H | -2.5500710 | -1.1405500 | 1.2286390  |
| C                           | 2.9635500    | -0.3395900 | -0.7080190 | H | -1.3045790 | -0.2891050 | -1.7358900 |
| H                           | 3.2252500    | -0.0532990 | 1.4144940  | H | -3.7022660 | -0.0289440 | -1.3737000 |
| H                           | 0.5356420    | -1.9924580 | 0.7586360  | O | -3.5899820 | 1.1060840  | 0.2873050  |
| H                           | 1.9944970    | -2.1209940 | -1.5894820 | H | -2.9830380 | 1.2911270  | 1.0179290  |
| H                           | 2.5925620    | 0.2628560  | -1.5462920 | O | -1.7032700 | 1.7028630  | -1.6185300 |
| O                           | 4.3635190    | -0.5367500 | -0.7837240 | H | -2.3256530 | 2.2438140  | -1.1186890 |
| H                           | 4.6474320    | -0.4946350 | -1.6993830 | C | -4.5103940 | -1.7156820 | 0.5830190  |
| O                           | 2.8689770    | -2.5545100 | 0.2366610  | H | -4.4839820 | -2.7331440 | 0.9840180  |
| H                           | 3.8146970    | -2.4143000 | 0.1050820  | H | -5.0858990 | -1.7403590 | -0.3521070 |
| H                           | 0.1489570    | -0.3851610 | -1.6889870 | O | -5.1283560 | -0.9165240 | 1.5628080  |
| C                           | 2.7082020    | 1.8497650  | 0.5464340  | H | -5.1043790 | -0.0035960 | 1.2550660  |
| H                           | 2.1160290    | 2.2160600  | -0.2999300 | O | -0.6815510 | 1.3691330  | 0.9660600  |
| H                           | 3.7591420    | 2.0914710  | 0.3629000  | H | -2.4036350 | -3.0664780 | -0.1199540 |
| O                           | 2.3293340    | 2.4809770  | 1.7469890  | H | -0.1306610 | -0.4804660 | 0.3812450  |
| H                           | 1.3699460    | 2.5744850  | 1.7361240  | C | 3.5732190  | -1.5319210 | -0.4353630 |
| O                           | 0.3465960    | 1.6893180  | -2.0082570 | N | 4.0820010  | -1.1121260 | 0.7251310  |
| H                           | -0.0243420   | 1.1786210  | 0.9043960  | C | 3.6662740  | 0.0902020  | 1.1393160  |
| H                           | 0.2509050    | 2.4603450  | -2.5705940 | C | 2.7489860  | 0.8614960  | 0.4228860  |
| O                           | -0.4118020   | 2.0536520  | 0.6982080  | C | 2.2804430  | 0.2952200  | -0.7605900 |
| H                           | -1.3125110   | 2.0294180  | 1.0340810  | N | 2.6790090  | -0.9045730 | -1.2028430 |
| H                           | -0.0430400   | 1.9333790  | -1.1482070 | H | 2.4235600  | 1.8409800  | 0.7464680  |
| <b>oRINT3<sub>H2O</sub></b> |              |            |            | N | 4.0375720  | -2.7310030 | -0.9017090 |
| H                           | -1079.151289 | a.u.       |            | H | 4.5228120  | -3.3163180 | -0.2431040 |
| G                           | -1079.230671 | a.u.       |            | H | 3.5054000  | -3.1695440 | -1.6340580 |
| C                           | -3.0800780   | -1.2712240 | 0.2717640  | N | 4.2219990  | 0.5473820  | 2.3037060  |
| O                           | -2.4168750   | -2.2097020 | -0.5547620 | H | 4.7049910  | -0.1404210 | 2.8590940  |



|   |           |           |            |   |           |            |            |
|---|-----------|-----------|------------|---|-----------|------------|------------|
| H | 3.7551780 | 1.2892780 | 2.7976110  | C | 3.9852660 | -0.3095330 | -0.9792300 |
| N | 1.3082270 | 0.9215560 | -1.5047290 | N | 4.3148310 | -0.9757140 | 0.1293960  |
| H | 1.1881640 | 1.9202660 | -1.3647370 | C | 3.4244980 | -0.9628540 | 1.1219730  |
| H | 1.2322990 | 0.5905890 | -2.4556010 | C | 2.1956940 | -0.2823800 | 1.0207250  |
| O | 0.8027400 | 3.5127150 | -0.1530970 | C | 1.9949080 | 0.3552170  | -0.1816730 |
| H | 0.4649660 | 4.3626020 | -0.4422580 | N | 2.8461440 | 0.3642640  | -1.1984770 |
| H | 0.0657430 | 3.0626230 | 0.2816720  | H | 1.4596470 | -0.2492600 | 1.8129340  |

**oRTS3\_4H<sub>2</sub>O**

H = -1079.134894 a.u.

G = -1079.205686 a.u.

|   |            |            |            |
|---|------------|------------|------------|
| C | -3.0067560 | -1.2156630 | -0.4212350 |
| O | -2.4788870 | -1.7390080 | -1.6315720 |
| C | -0.5183070 | 0.3665000  | 0.0011220  |
| C | -1.5947510 | 0.8416260  | -0.9839030 |
| C | -2.9695920 | 0.3046460  | -0.5695010 |
| H | -2.3881600 | -1.5018150 | 0.4410380  |
| H | -1.3614590 | 0.4901250  | -1.9919780 |
| H | -3.6891160 | 0.6003280  | -1.3405620 |
| O | -3.3835680 | 0.9320670  | 0.6374620  |
| H | -2.6193090 | 0.8291880  | 1.2450590  |
| O | -1.6275500 | 2.2576530  | -1.0179690 |
| H | -2.2308810 | 2.5374930  | -0.3180660 |
| C | -4.4316090 | -1.7167200 | -0.1824500 |
| H | -4.4403220 | -2.8092460 | -0.2519180 |
| H | -5.0806610 | -1.3281060 | -0.9798810 |
| O | -4.9186690 | -1.3898390 | 1.0961430  |
| H | -4.7551900 | -0.4480040 | 1.2322110  |
| O | -0.8163710 | 0.6446520  | 1.2982780  |
| H | -2.5084740 | -2.6987130 | -1.5973050 |
| H | -0.3087120 | -0.6993000 | -0.1662950 |

|   |            |            |            |
|---|------------|------------|------------|
| H | 5.6806740  | -0.9278260 | -1.9163350 |
| H | 4.6166320  | 0.0522360  | -2.8796160 |
| N | 3.7475150  | -1.6634020 | 2.2394320  |
| H | 4.6964330  | -1.9904320 | 2.3207260  |
| H | 3.2151970  | -1.5322470 | 3.0822290  |
| N | 0.7873220  | 1.1036850  | -0.3982340 |
| H | 0.7607000  | 2.0277780  | 0.3390720  |
| H | 0.7685860  | 1.4193620  | -1.3678720 |
| O | 0.4501830  | 2.6587980  | 1.4799210  |
| H | -0.0282130 | 3.4818630  | 1.3542820  |
| H | -0.2581490 | 1.7981440  | 1.5841740  |

**oRINT4H<sub>2</sub>O**

H = -1079.164097 a.u.

G = -1079.237490 a.u.

|   |            |            |            |
|---|------------|------------|------------|
| C | -3.1514610 | -1.0650170 | -0.5475460 |
| O | -2.6539460 | -1.4654780 | -1.8142690 |
| C | -0.4922800 | 0.2520520  | -0.0657920 |
| C | -1.5917610 | 0.9438660  | -0.8780080 |
| C | -2.9957360 | 0.4544250  | -0.5015960 |
| H | -2.5642980 | -1.5091060 | 0.2695950  |
| H | -1.4198570 | 0.7250040  | -1.9341670 |
| H | -3.6953350 | 0.8988400  | -1.2162610 |

|   |            |            |            |                             |            |            |            |
|---|------------|------------|------------|-----------------------------|------------|------------|------------|
| O | -3.3739020 | 0.9568870  | 0.7763960  | H                           | -0.3852230 | 1.1102660  | 1.6995580  |
| H | -2.6872500 | 0.6554570  | 1.3936720  | <b>oRINT5<sub>H2O</sub></b> |            |            |            |
| O | -1.5214250 | 2.3478220  | -0.7210580 | H = -1079.16142 a.u.        |            |            |            |
| H | -2.0373150 | 2.5735900  | 0.0629320  | G = -1079.234039 a.u.       |            |            |            |
| C | -4.6118970 | -1.4852000 | -0.3734580 | C                           | 3.0302740  | -0.6787380 | 1.0451200  |
| H | -4.6989050 | -2.5566100 | -0.5794430 | O                           | 2.6145720  | -0.0096000 | 2.2203420  |
| H | -5.2236960 | -0.9528820 | -1.1148770 | C                           | 0.4281840  | 0.1232590  | -0.5599880 |
| O | -5.0856950 | -1.2902010 | 0.9370100  | C                           | 1.6544450  | 1.0189900  | -0.2977920 |
| H | -4.9104520 | -0.3717960 | 1.1743210  | C                           | 2.9458480  | 0.2101700  | -0.2123650 |
| O | -0.7709750 | 0.2951110  | 1.3295700  | H                           | 2.4336220  | -1.5819730 | 0.8654660  |
| H | -2.7640250 | -2.4150510 | -1.9119150 | H                           | 1.5211470  | 1.5622780  | 0.6398080  |
| H | -0.4725660 | -0.8103560 | -0.3317010 | H                           | 3.7719880  | 0.9332430  | -0.1976560 |
| C | 4.1727780  | 0.0964050  | -0.7237320 | O                           | 3.0242600  | -0.5987920 | -1.3793190 |
| N | 4.4129230  | -0.9854210 | 0.0221630  | H                           | 3.8435700  | -1.1071960 | -1.3256550 |
| C | 3.3649280  | -1.4797240 | 0.6839690  | O                           | 1.7544960  | 1.9990770  | -1.3171550 |
| C | 2.0853000  | -0.9149460 | 0.6093380  | H                           | 1.4775170  | 1.5735360  | -2.1405220 |
| C | 1.9722550  | 0.1957190  | -0.2190110 | C                           | 4.4687010  | -1.0879470 | 1.3301350  |
| N | 3.0038710  | 0.7174510  | -0.8917880 | H                           | 4.4819610  | -1.8040050 | 2.1563250  |
| H | 1.2530340  | -1.2930980 | 1.1854250  | H                           | 5.0251920  | -0.1915430 | 1.6255430  |
| N | 5.2493820  | 0.6413550  | -1.3638910 | O                           | 5.0130990  | -1.6585070 | 0.1443760  |
| H | 6.0671000  | 0.0606460  | -1.4452860 | H                           | 5.9335540  | -1.8879190 | 0.2862150  |
| H | 5.0529780  | 1.2948280  | -2.1033060 | O                           | 0.3809290  | -0.2108750 | -1.9447530 |
| N | 3.5984190  | -2.6031850 | 1.4273630  | H                           | 1.6555620  | -0.0156140 | 2.2821600  |
| H | 4.5669320  | -2.8162940 | 1.6067520  | H                           | 0.5161970  | -0.8092980 | 0.0167860  |
| H | 2.9375940  | -2.8501870 | 2.1446270  | C                           | -4.1426690 | 0.3185800  | 0.5663990  |
| N | 0.7739980  | 0.8659630  | -0.3777240 | N                           | -4.4342470 | -0.9609630 | 0.3107580  |
| H | 0.9330030  | 2.5767910  | 1.0495980  | C                           | -3.4301040 | -1.6910690 | -0.1787610 |
| H | 0.7782520  | 1.5458630  | -1.1277530 | C                           | -2.1522210 | -1.1739250 | -0.4026590 |
| O | 0.5500290  | 2.6682490  | 1.9318630  | C                           | -1.9730090 | 0.1686220  | -0.0617030 |
| H | 0.3344370  | 3.5963610  | 2.0442780  | N                           | -2.9683780 | 0.9272420  | 0.4197860  |

H -1.3749740 -1.7604490 -0.8691130  
N -5.1814890 1.0970380 1.0043020  
H -5.9821680 0.6064330 1.3663480  
H -4.9285070 1.9694320 1.4378030  
N -3.7154490 -3.0116910 -0.4290880  
H -4.6990450 -3.2262220 -0.4873320  
H -3.1209230 -3.4999260 -1.0784590  
N -0.7637610 0.7952230 -0.1748310  
H 1.1763280 -0.7324700 -2.1257370  
H -0.7448160 1.7977890 -0.0038360  
O 0.0999280 3.6184170 0.1406520  
H 0.7241100 3.4380750 -0.5779660  
H -0.3420180 4.4424620 -0.0701290

**oRTS5\_6H<sub>2</sub>O**

H = -1079.113015 a.u.

G = -1079.183923 a.u.

C -2.9126430 -1.1942000 -0.5438910  
O -2.3459220 -1.5581340 -1.7850500  
C -0.4018780 0.4768290 0.0050100  
C -1.6401810 1.0413800 -0.7124070  
C -2.9463780 0.3309280 -0.3580890  
H -2.3670840 -1.6364320 0.2993190  
H -1.4474310 0.9143960 -1.7790100  
H -3.7282010 0.7502940 -1.0055780  
O -3.2267260 0.6721520 1.0021540  
H -4.0439260 0.2230490 1.2586480  
O -1.7968980 2.4304420 -0.4809810  
H -2.4284950 2.5315730 0.2405600  
C -4.3198030 -1.7734420 -0.5764540  
H -4.2594310 -2.8646110 -0.5925070

H -4.8114760 -1.4285860 -1.4927160  
O -5.0125560 -1.3107300 0.5797690  
H -5.9059310 -1.6599900 0.5878480  
O -0.5874860 0.9276620 1.5595010  
H -1.3856550 -1.5299430 -1.7371510  
H -0.4477280 -0.6130070 0.1133280  
C 4.1255660 -0.0234730 -0.7005560  
N 4.3038470 -1.1014430 0.0742060  
C 3.2279420 -1.4886680 0.7578490  
C 1.9953560 -0.8401670 0.6635060  
C 1.9179050 0.2488190 -0.2214210  
N 3.0055860 0.6640560 -0.8941500  
H 1.1722550 -1.1352640 1.2992490  
N 5.2434770 0.4375210 -1.3492920

H 6.0061290 -0.2135300 -1.4350870  
H 5.0735720 1.0643700 -2.1183920  
N 3.3904910 -2.6012530 1.5571250  
H 4.3532250 -2.8163280 1.7694780  
H 2.7506110 -2.7030470 2.3283380  
N 0.7733130 0.9795970 -0.4636210  
H -1.5326780 0.9044010 1.7925970  
H 0.8593280 2.3518250 0.2533030  
O 0.5877240 2.9541610 1.0808650  
H 0.0289960 3.6421370 0.7029470  
H -0.1234770 1.9768870 1.5136120

**oRINT6H<sub>2</sub>O**

H = -1079.15336 a.u.

G = -1079.231563 a.u.

C 2.8501260 -1.3214960 -0.5582760  
O 2.9384910 -2.5268850 0.1856790

|   |            |            |            |                              |            |            |            |
|---|------------|------------|------------|------------------------------|------------|------------|------------|
| C | 0.4024160  | -0.5046100 | 0.9926600  | H                            | -4.0100720 | 2.0765390  | -2.1056230 |
| C | 1.7837640  | -0.2151840 | 1.5230580  | N                            | -0.5144260 | 0.3661020  | 0.9590540  |
| C | 2.7696210  | -0.0828160 | 0.3490500  | H                            | 0.7296940  | 2.1007610  | -1.0229000 |
| H | 1.9726890  | -1.3182280 | -1.2166020 | H                            | -0.3332010 | 2.1850810  | 1.5119510  |
| H | 2.0993820  | -1.0708510 | 2.1273530  | O                            | 0.0798160  | 3.0667080  | 1.5996360  |
| H | 3.7545270  | 0.1038670  | 0.7975510  | H                            | -0.1903400 | 3.4202780  | 2.4495250  |
| O | 2.3448520  | 1.0463800  | -0.3920790 | H                            | 0.1415130  | 3.3276460  | -0.3761260 |
| H | 2.9955090  | 1.1985730  | -1.0895720 | <b>oRINT3<sub>2H2O</sub></b> |            |            |            |
| O | 1.8511240  | 0.9080320  | 2.3459280  | H = -1155.564496 a.u.        |            |            |            |
| H | 1.5853690  | 1.6970340  | 1.8490570  | G = -1155.648393 a.u.        |            |            |            |
| C | 4.1196110  | -1.3024160 | -1.4001440 | C                            | -3.1887570 | -1.5289890 | 0.4045030  |
| H | 4.0799200  | -2.1146680 | -2.1315090 | O                            | -2.4330890 | -2.6132760 | -0.1019190 |
| H | 4.9677810  | -1.4716220 | -0.7267650 | C                            | -0.6668350 | -0.0562040 | 0.2805570  |
| O | 4.2193760  | -0.0359870 | -2.0389370 | C                            | -1.5979810 | -0.0327660 | -0.9288200 |
| H | 5.0392860  | 0.0156120  | -2.5340350 | C                            | -3.0471220 | -0.2688950 | -0.4626140 |
| O | 0.1308550  | 2.8356690  | -1.2066990 | H                            | -2.7729430 | -1.3074960 | 1.3923950  |
| H | 2.0592720  | -2.8635230 | 0.3708600  | H                            | -1.2985610 | -0.8554510 | -1.5792380 |
| H | 0.2162150  | -1.5114670 | 0.5970820  | H                            | -3.6597190 | -0.3709250 | -1.3726770 |
| C | -3.4463030 | -1.5081110 | 0.2289090  | O                            | -3.4441490 | 0.8850440  | 0.2566900  |
| N | -4.1494270 | -0.7679800 | -0.6312630 | H                            | -4.3124670 | 0.7028910  | 0.6377120  |
| C | -3.6095210 | 0.3998390  | -0.9857850 | O                            | -1.5120900 | 1.1402190  | -1.6837210 |
| C | -2.3843210 | 0.8504650  | -0.4615160 | H                            | -1.6762020 | 1.9048860  | -1.1121790 |
| C | -1.7626580 | -0.0232680 | 0.4050100  | C                            | -4.6409160 | -1.9659550 | 0.5628110  |
| N | -2.2565920 | -1.2103870 | 0.7628530  | H                            | -4.6834160 | -2.8125050 | 1.2539320  |
| H | -1.9091180 | 1.7773100  | -0.7582030 | H                            | -5.0228550 | -2.2888860 | -0.4160680 |
| N | -4.0172330 | -2.6826140 | 0.6264130  | O                            | -5.3929640 | -0.8616850 | 1.0488350  |
| H | -4.7874820 | -3.0282940 | 0.0796960  | H                            | -6.3043430 | -1.1217400 | 1.1976150  |
| H | -3.4298420 | -3.3405010 | 1.1093800  | O                            | -0.4681150 | 0.9047410  | 0.9830510  |
| N | -4.2924310 | 1.1338580  | -1.9017200 | H                            | -2.7569680 | -2.8484800 | -0.9774090 |
| H | -5.2228520 | 0.8378400  | -2.1444870 | H                            | -0.2239610 | -1.0364040 | 0.5274380  |

|                                          |            |            |            |   |            |            |            |
|------------------------------------------|------------|------------|------------|---|------------|------------|------------|
| C                                        | 4.1129150  | -1.4667040 | -0.2769290 | H | -2.3301620 | -1.2794420 | 1.1279020  |
| N                                        | 4.5052840  | -0.8314660 | 0.8288080  | H | -1.2906980 | -0.5051660 | -1.9529660 |
| C                                        | 3.8097260  | 0.2688180  | 1.1407700  | H | -3.5757800 | -0.3945640 | -1.5102210 |
| C                                        | 2.7446150  | 0.7335400  | 0.3727790  | O | -3.4607170 | 0.8623610  | 0.1205180  |
| C                                        | 2.4337120  | -0.0273910 | -0.7538670 | H | -4.2253930 | 0.5410120  | 0.6116050  |
| N                                        | 3.1144330  | -1.1313770 | -1.0945610 | O | -1.6044570 | 1.4704940  | -1.7729810 |
| H                                        | 2.1837340  | 1.6255990  | 0.6158910  | H | -1.7622150 | 2.1405250  | -1.0665870 |
| N                                        | 4.7948880  | -2.6171870 | -0.5892180 | C | -4.2316080 | -2.0895010 | 0.5209960  |
| H                                        | 5.7013880  | -2.7153610 | -0.1620260 | H | -4.0877630 | -2.9975140 | 1.1146180  |
| H                                        | 4.6951310  | -2.9377240 | -1.5384020 | H | -4.7315890 | -2.3599250 | -0.4207000 |
| N                                        | 4.2347410  | 0.9496810  | 2.2563140  | O | -4.9992390 | -1.1268410 | 1.2305340  |
| H                                        | 4.8289920  | 0.4182720  | 2.8736390  | H | -5.8567940 | -1.4929660 | 1.4553350  |
| H                                        | 3.5702990  | 1.5609220  | 2.7022600  | O | -0.6381280 | 0.7549380  | 1.0638050  |
| N                                        | 1.3600930  | 0.2987970  | -1.5417460 | H | -2.5320160 | -2.7014800 | -1.3120990 |
| H                                        | 1.0268670  | 1.2588920  | -1.5043280 | H | -0.1937440 | -0.9401710 | 0.0619140  |
| H                                        | 1.3590060  | -0.1366850 | -2.4520040 | C | 3.9165260  | -1.0514840 | -0.7748560 |
| O                                        | -1.7449840 | 3.2673820  | 0.3203420  | N | 4.3664100  | -0.9947620 | 0.4806480  |
| H                                        | -2.6961160 | 3.1265990  | 0.3445190  | C | 3.6059460  | -0.3432130 | 1.3606370  |
| H                                        | -1.3788830 | 2.5207590  | 0.8264210  | C | 2.3912110  | 0.2701270  | 0.9954930  |
| O                                        | 0.7977540  | 3.1846690  | -0.8827130 | C | 2.0605480  | 0.1278760  | -0.3311340 |
| H                                        | 1.2572790  | 3.9523320  | -1.2280120 | N | 2.7789140  | -0.5150590 | -1.2408290 |
| H                                        | -0.0773630 | 3.4918930  | -0.6063070 | H | 1.7395270  | 0.7828530  | 1.6889260  |
| <b>oRTS3_4<sub>2</sub>H<sub>2</sub>O</b> |            |            |            | N | 4.6712800  | -1.7460710 | -1.6664760 |
| H = -1155.554192 a.u.                    |            |            |            | H | 5.6073060  | -1.9925160 | -1.3931980 |
| G = -1155.630908 a.u.                    |            |            |            | H | 4.4562040  | -1.6404650 | -2.6432720 |
| C                                        | -2.8616640 | -1.5016090 | 0.1987620  | N | 4.0730530  | -0.2689890 | 2.6337350  |
| O                                        | -2.1042430 | -2.4991700 | -0.4737130 | H | 4.8592730  | -0.8521000 | 2.8704780  |
| C                                        | -0.4522490 | 0.1141230  | -0.0963280 | H | 3.4579210  | 0.0236450  | 3.3734040  |
| C                                        | -1.5602410 | 0.2104540  | -1.1671790 | N | 0.8312410  | 0.7019860  | -0.8203770 |
| C                                        | -2.9390050 | -0.2092540 | -0.6261590 | H | 0.8514290  | 1.7735210  | -0.6494400 |

|   |            |           |            |   |           |            |            |
|---|------------|-----------|------------|---|-----------|------------|------------|
| H | 0.7810220  | 0.5516860 | -1.8296750 | C | 4.2127950 | -0.1794230 | -0.8250430 |
| O | -1.3771630 | 2.9601770 | 0.4562170  | N | 4.4942040 | -1.0246160 | 0.1717220  |
| H | -2.1362680 | 3.3740690 | 0.8660570  | C | 3.4690410 | -1.3506370 | 0.9611110  |
| H | -1.0783580 | 1.7859210 | 0.8829600  | C | 2.1743410 | -0.8554030 | 0.7686450  |
| O | 0.9238220  | 3.3006110 | -0.3514390 | C | 2.0174330 | 0.0053960  | -0.3153820 |
| H | 1.5333150  | 3.5977730 | 0.3271180  | N | 3.0288460 | 0.3592410  | -1.1171470 |
| H | -0.0272830 | 3.3999030 | 0.0260140  | H | 1.3627340 | -1.0798360 | 1.4462880  |

**oRINT4<sub>2H2O</sub>**

H = -1155.583289 a.u.

G = -1155.662974 a.u.

|   |            |            |            |   |            |            |            |
|---|------------|------------|------------|---|------------|------------|------------|
| C | -3.0612290 | -1.4069770 | -0.1816680 | N | 5.2481440  | 0.1373570  | -1.6593810 |
| O | -2.4072580 | -2.3353760 | -1.0332270 | H | 6.1748250  | -0.0564460 | -1.3184030 |
| C | -0.4483360 | -0.0011240 | -0.1495510 | H | 5.1173950  | 0.9412440  | -2.2505240 |
| C | -1.5331780 | 0.3817140  | -1.1745460 | N | 3.7606810  | -2.1730820 | 2.0174280  |
| C | -2.9579020 | 0.0220280  | -0.7305480 | H | 4.6483750  | -2.6474380 | 1.9624770  |
| H | -2.5386020 | -1.4429540 | 0.7771130  | H | 3.0044720  | -2.6815750 | 2.4443630  |
| H | -1.3045540 | -0.1888200 | -2.0788280 | N | 0.8029430  | 0.5990230  | -0.5941280 |
| H | -3.5956150 | 0.1025860  | -1.6280640 | H | 1.2136740  | 2.1795730  | 0.6163290  |
| O | -3.3573390 | 0.9863410  | 0.2210070  | H | 0.7751030  | 1.1041100  | -1.4725790 |
| H | -4.1745970 | 0.6811060  | 0.6327360  | O | -1.3720050 | 3.1012880  | 0.9452330  |
| O | -1.4653260 | 1.7359660  | -1.5473790 | H | -1.9871080 | 3.6803010  | 1.3979910  |
| H | -1.6785600 | 2.2861500  | -0.7751790 | H | -1.1836540 | 1.1953730  | 1.2160180  |
| C | -4.5040570 | -1.8655270 | 0.0045350  | O | 1.2959060  | 2.8669090  | 1.2992070  |
| H | -4.4972540 | -2.8757470 | 0.4244260  | H | 1.6073050  | 2.3904360  | 2.0733410  |
| H | -4.9970120 | -1.8953100 | -0.9780090 | H | -0.4627160 | 3.3335300  | 1.2106790  |
| O | -5.1736070 | -0.9541930 | 0.8666520  |   |            |            |            |
| H | -6.0769290 | -1.2428190 | 1.0114200  |   |            |            |            |
| O | -0.7448630 | 0.3289000  | 1.1829430  |   |            |            |            |
| H | -2.8270340 | -2.3174360 | -1.8994130 |   |            |            |            |
| H | -0.3414870 | -1.0904520 | -0.1624500 |   |            |            |            |

**oRINT5<sub>2H2O</sub>**

H = -1155.583445 a.u.

G = -1155.663799 a.u.

|   |            |            |            |  |  |  |  |
|---|------------|------------|------------|--|--|--|--|
| C | -3.1724740 | -1.2248130 | -0.6967420 |  |  |  |  |
| O | -2.7447990 | -1.3427940 | -2.0405250 |  |  |  |  |
| C | -0.4800450 | 0.1373550  | 0.1422320  |  |  |  |  |
| C | -1.6751170 | 0.8571390  | -0.5059400 |  |  |  |  |
| C | -3.0129990 | 0.2062660  | -0.1504200 |  |  |  |  |

|   |            |            |            |                                          |            |            |            |
|---|------------|------------|------------|------------------------------------------|------------|------------|------------|
| H | -2.6199400 | -1.9072900 | -0.0382310 | H                                        | 0.8304680  | 1.5003650  | -0.8121390 |
| H | -1.5544150 | 0.8084690  | -1.5899150 | O                                        | 0.4161080  | 3.0109610  | 1.8424960  |
| H | -3.7936020 | 0.8462680  | -0.5816690 | H                                        | 0.8605020  | 3.3117330  | 2.6375070  |
| O | -3.1202280 | 0.1995230  | 1.2688810  | H                                        | 0.3655130  | 2.0423960  | 1.9013640  |
| H | -3.9714110 | -0.1952780 | 1.4977770  | O                                        | 0.7409510  | 3.4954820  | -0.9807710 |
| O | -1.6951200 | 2.2281450  | -0.1764740 | H                                        | 0.9086990  | 3.5532730  | -0.0297960 |
| H | -1.5554850 | 2.3373280  | 0.7738770  | H                                        | -0.2218970 | 3.4632860  | -1.0162750 |
| C | -4.6369110 | -1.6415750 | -0.7242580 | <b>oRTS5_6<sub>2</sub>H<sub>2</sub>O</b> |            |            |            |
| H | -4.7064770 | -2.6974110 | -0.9995690 | H = -1155.538163 a.u.                    |            |            |            |
| H | -5.1457040 | -1.0400030 | -1.4856680 | G = -1155.613502 a.u.                    |            |            |            |
| O | -5.1915920 | -1.4075130 | 0.5662000  | C                                        | -3.0457570 | -1.3082320 | -0.5509400 |
| H | -6.1297850 | -1.6074530 | 0.5581770  | O                                        | -2.5166750 | -1.7046130 | -1.7990190 |
| O | -0.4488190 | 0.3920510  | 1.5528060  | C                                        | -0.4393020 | 0.2326600  | -0.0436630 |
| H | -1.7930090 | -1.4696670 | -2.0748700 | C                                        | -1.6587670 | 0.8487490  | -0.7474250 |
| H | -0.5895010 | -0.9467410 | -0.0033500 | C                                        | -2.9987210 | 0.2173640  | -0.3686060 |
| C | 4.1387380  | -0.2490220 | -0.6667890 | H                                        | -2.5082460 | -1.7744250 | 0.2847190  |
| N | 4.3350030  | -1.3821910 | 0.0169440  | H                                        | -1.4949680 | 0.6936820  | -1.8150340 |
| C | 3.2562000  | -1.8792240 | 0.6226170  | H                                        | -3.7642850 | 0.6793840  | -1.0053070 |
| C | 1.9969250  | -1.2767220 | 0.5502370  | O                                        | -3.2450430 | 0.5704650  | 0.9959890  |
| C | 1.9217120  | -0.1201720 | -0.2302470 | H                                        | -4.0828820 | 0.1637530  | 1.2581970  |
| N | 2.9920080  | 0.4054220  | -0.8363090 | O                                        | -1.7327420 | 2.2484570  | -0.5530540 |
| H | 1.1573790  | -1.6595170 | 1.1109870  | H                                        | -2.1880430 | 2.4059940  | 0.2817250  |
| N | 5.2475800  | 0.3136550  | -1.2340130 | C                                        | -4.4802450 | -1.8167150 | -0.5612880 |
| H | 6.0549190  | -0.2782420 | -1.3333550 | H                                        | -4.4755490 | -2.9095510 | -0.5725130 |
| H | 5.0839490  | 1.0224930  | -1.9297200 | H                                        | -4.9665750 | -1.4512620 | -1.4723790 |
| N | 3.4419720  | -3.0525940 | 1.3124500  | O                                        | -5.1336320 | -1.3147490 | 0.6017800  |
| H | 4.4034310  | -3.2724050 | 1.5226440  | H                                        | -6.0422780 | -1.6214410 | 0.6249970  |
| H | 2.7701390  | -3.2881390 | 2.0239840  | O                                        | -0.6115220 | 0.5885390  | 1.5081240  |
| N | 0.7416560  | 0.5477650  | -0.4509240 | H                                        | -1.5556460 | -1.7241420 | -1.7630870 |
| H | -1.3294770 | 0.1899070  | 1.9061590  | H                                        | -0.5171380 | -0.8626070 | 0.0143090  |

|                              |            |            |            |   |            |            |            |
|------------------------------|------------|------------|------------|---|------------|------------|------------|
| C                            | 4.0823610  | -0.3324890 | -0.7178520 | H | -2.3846890 | -1.9810740 | -0.0606520 |
| N                            | 4.2470720  | -1.3913770 | 0.0867500  | H | -1.7915720 | 0.6293720  | -2.1088490 |
| C                            | 3.1622280  | -1.7508190 | 0.7725620  | H | -3.7520770 | 0.6486360  | -0.7196600 |
| C                            | 1.9375420  | -1.0934250 | 0.6586820  | O | -2.7330880 | 0.2629430  | 1.0356090  |
| C                            | 1.8738990  | -0.0246550 | -0.2552360 | H | -3.5331900 | -0.0849320 | 1.4504890  |
| N                            | 2.9713720  | 0.3589190  | -0.9367020 | O | -1.6466100 | 2.1272320  | -0.7798390 |
| H                            | 1.1068200  | -1.3661830 | 1.2942290  | H | -1.4807790 | 2.2803540  | 0.1667740  |
| N                            | 5.2099670  | 0.0995890  | -1.3726720 | C | -4.4926470 | -1.8395660 | -0.4480560 |
| H                            | 5.9599340  | -0.5677650 | -1.4449990 | H | -4.5633520 | -2.9250410 | -0.5600260 |
| H                            | 5.0482140  | 0.7070680  | -2.1590330 | H | -5.1299560 | -1.3614440 | -1.2007650 |
| N                            | 3.3096700  | -2.8493060 | 1.5970200  | O | -4.8584480 | -1.4296770 | 0.8644650  |
| H                            | 4.2699770  | -3.0636850 | 1.8211160  | H | -5.7671560 | -1.6798180 | 1.0424680  |
| H                            | 2.6674540  | -2.9219300 | 2.3697370  | O | -0.3703320 | 0.3471800  | 2.6670060  |
| N                            | 0.7439660  | 0.7003910  | -0.5252740 | H | -1.9073770 | -1.8737840 | -2.2252650 |
| H                            | -1.5584120 | 0.5662930  | 1.7385950  | H | -0.3760650 | -1.0162210 | -0.5063310 |
| H                            | 0.9897020  | 2.2626670  | -0.7149630 | C | 4.0044140  | -0.5774710 | -0.9295560 |
| O                            | 0.5133660  | 2.6902470  | 1.7953480  | N | 4.2563180  | -1.2864370 | 0.1768750  |
| H                            | 0.2469070  | 3.3699110  | 2.4163800  | C | 3.2729090  | -1.3462610 | 1.0729450  |
| H                            | -0.1055090 | 1.6120360  | 1.7094050  | C | 2.0312340  | -0.7153700 | 0.8739570  |
| O                            | 0.9872380  | 3.2829960  | -0.5231880 | C | 1.9154650  | -0.0189350 | -0.3136940 |
| H                            | 0.7375570  | 3.0764170  | 0.8098600  | N | 2.8776680  | 0.0748590  | -1.2301530 |
| H                            | 0.1712800  | 3.5729120  | -0.9450530 | H | 1.2427260  | -0.7056270 | 1.6163600  |
| <b>oRINT6<sub>2H2O</sub></b> |            |            |            | N | 5.0202270  | -0.4860610 | -1.8336480 |
| H = -1155.565553 a.u.        |            |            |            | H | 5.7938770  | -1.1200550 | -1.7326180 |
| G = -1155.649361 a.u.        |            |            |            | H | 4.8004190  | -0.1155430 | -2.7421640 |
| C                            | -3.0570650 | -1.3987040 | -0.7020570 | N | 3.5091330  | -2.0833240 | 2.1967870  |
| O                            | -2.8344240 | -1.6741760 | -2.0753020 | H | 4.4694970  | -2.3315270 | 2.3738640  |
| C                            | -0.3563190 | 0.0704590  | -0.6688850 | H | 2.9136440  | -1.9399200 | 2.9955850  |
| C                            | -1.6626760 | 0.7505070  | -1.0268950 | N | 0.7349640  | 0.7044290  | -0.6128670 |
| C                            | -2.8744750 | 0.0924740  | -0.3643170 | H | -1.2150450 | 0.2074770  | 2.2211980  |



H 1.0573500 2.6487380 -0.8465880  
O -0.3819120 3.0184920 1.5984190  
H -0.5907710 3.7490530 2.1845620  
H -0.1613540 1.2636440 2.4365730  
O 0.8988490 3.6019320 -0.7212140  
H 0.2126770 3.3693930 0.8999870  
H 0.0977060 3.7398550 -1.2377090

**pINT3<sub>H2O</sub>**

H = -1079.154689 a.u.

G = -1079.233179 a.u.

C -2.3357570 -0.1681310 0.9561440  
N -2.9370850 -1.0785720 0.1756170  
C -3.9008750 -0.6198960 -0.6319830  
C -4.2633540 0.7256060 -0.6740320  
C -3.5451080 1.5769570 0.1676230  
N -2.5804690 1.1439460 0.9862670  
H -5.0436010 1.0883640 -1.3285470  
N -1.3745420 -0.6320230 1.7961670  
H -1.0385650 -1.5738580 1.6505520  
H -0.7638790 0.0367090 2.2417470  
N -4.5402820 -1.5585240 -1.3956480  
H -4.0936820 -2.4604440 -1.4536550  
H -5.0339070 -1.2497410 -2.2161080  
N -3.7671470 2.9277760 0.1748560  
H -3.3720080 3.4251960 0.9574950  
H -4.6429330 3.2710560 -0.1822170  
C 3.4738760 0.8794060 -0.3545040  
O 2.5486710 1.5863800 -1.1575030  
C 0.5116260 0.1252090 -0.3366520  
C 1.5238070 -0.4375140 0.6393830

C 2.9369400 -0.5010890 0.0505410  
H 3.6047370 1.4761750 0.5511920  
H 0.0228940 1.0688470 -0.0418350  
H 1.2250250 -1.4750890 0.8449630  
H 2.9041590 -1.1558080 -0.8339120  
O 3.7176880 -1.0733640 1.0817960  
H 4.6499110 -0.9700080 0.8514070  
O 1.5011040 0.3423270 1.8138810  
H 2.2375850 0.0395170 2.3587740  
O 0.2529890 -0.4423480 -1.3705680  
H 2.3320860 1.0650510 -1.9395460  
C 4.7992310 0.7920770 -1.1063150  
H 5.1390560 1.8070820 -1.3307270  
H 4.6366040 0.2567580 -2.0520170  
O 5.7438010 0.0998750 -0.2985380  
H 6.5907850 0.0535600 -0.7467720  
O -0.7895840 -2.9570650 -0.1620620  
H -1.6523990 -2.5068490 -0.1528210  
H -0.3048620 -2.4969360 -0.8560510

**pTS3\_4<sub>H2O</sub>**

H = -1079.133491 a.u.

G = -1079.204851 a.u.

C 2.0445610 -0.3488160 0.1777230  
N 2.1731630 0.9557800 0.1809710  
C 3.2928990 1.4213560 -0.4023280  
C 4.2377920 0.5644770 -0.9696910  
C 3.9626170 -0.8003980 -0.9004450  
N 2.8463930 -1.2735770 -0.3154240  
H 5.1366820 0.9395190 -1.4403500  
N 0.8644350 -0.8653460 0.8273020

H 0.9977450 -0.8037260 1.9751830  
 H 0.7268820 -1.8231070 0.4984350  
 N 3.4477430 2.7686380 -0.3787570  
 H 2.6618180 3.3130060 -0.0603410  
 H 4.1489560 3.2150480 -0.9427310  
 N 4.7871550 -1.7354490 -1.4495470  
 H 4.6062810 -2.6951790 -1.2027820  
 H 5.7312650 -1.4855250 -1.6885130  
 C -3.0150730 0.7368560 -0.5779100  
 O -2.4847840 1.9083880 -0.0006910  
 C -0.4449780 -0.0458030 0.6311800  
 C -1.5466600 -1.0904430 0.5096060  
 C -2.9476040 -0.4616030 0.3855880  
 H -2.4862120 0.4769500 -1.5072530  
 H -0.3105010 0.4593850 -0.3355480  
 H -1.5516130 -1.7028420 1.4257030  
 H -3.2536550 -0.1008360 1.3747860  
 O -3.7758730 -1.5481130 -0.0119350  
 H -4.4470370 -1.2381600 -0.6355660  
 O -1.2466330 -1.8962800 -0.6105220  
 H -2.0621890 -2.3667780 -0.8272900  
 O -0.6540880 0.8037290 1.6565380  
 H -1.8604390 1.6994630 0.7244050  
 C -4.4492240 1.1183300 -0.9326200  
 H -4.4124010 2.0715530 -1.4654270  
 H -5.0231290 1.2515750 -0.0076180  
 O -5.0280330 0.0987530 -1.7496390  
 H -5.9087500 0.3660150 -2.0203380  
 O 0.8357000 -0.2128150 3.2120760  
 H 0.4326410 -0.7123570 3.9253540

H 0.0651450 0.3926370 2.6648400  
**pINT<sub>4</sub>H<sub>2</sub>O**  
 H = -1079.162469 a.u.  
 G = -1079.236754 a.u.  
 C 2.0578410 -0.2919130 -0.1169040  
 N 2.0981810 0.9618240 0.3070400  
 C 3.2739280 1.5892570 0.1562230  
 C 4.3818230 0.9704100 -0.4204490  
 C 4.1979890 -0.3490410 -0.8374540  
 N 3.0377360 -0.9964280 -0.6837650  
 H 5.3269600 1.4821010 -0.5416820  
 N 0.8642850 -0.9888300 0.0619650  
 H 0.9818770 -2.2153930 1.7507790  
 H 0.7545140 -1.7064420 -0.6477240  
 N 3.3259900 2.8675140 0.6335670  
 H 2.4387620 3.2859060 0.8650320  
 H 4.0577350 3.4800150 0.3165970  
 N 5.1956640 -1.0465560 -1.4649620  
 H 5.0507800 -2.0413240 -1.5361140  
 H 6.1452260 -0.7362570 -1.3459050  
 C -3.0941470 0.9361080 -0.1890950  
 O -2.4984090 1.7984210 0.7594320  
 C -0.3640210 -0.2558590 0.3280980  
 C -1.5324350 -1.1240360 -0.1228260  
 C -2.9238050 -0.5428900 0.1944410  
 H -2.6636910 1.0996770 -1.1869710  
 H -0.3606640 0.6904250 -0.2199530  
 H -1.4666200 -2.0886530 0.4058340  
 H -3.1063030 -0.6247290 1.2738560  
 O -3.8132720 -1.4060060 -0.5023520

H -4.5387440 -0.8939580 -0.8854790  
O -1.3813440 -1.3209220 -1.5111630  
H -2.2104370 -1.7122480 -1.8146750  
O -0.5043790 0.0909670 1.6858760  
H -1.8589420 1.3257020 1.3120310  
C -4.5563120 1.3718580 -0.2148040  
H -4.5729150 2.4605200 -0.3063620  
H -5.0331890 1.0884610 0.7313830  
O -5.2142220 0.7552490 -1.3217130  
H -6.1158950 1.0777240 -1.3813150  
O 0.5082770 -2.3421650 2.5868810  
H 0.4708410 -3.2845450 2.7584880  
H -0.3706650 -0.6973540 2.2361950

**pINT5<sub>H2O</sub>**

H = -1079.161593 a.u.

G = -1079.235786 a.u.

C 1.9016810 0.2925690 -0.3733620  
N 2.3251580 -0.9720960 -0.2594170  
C 3.5920520 -1.1244420 0.1484140  
C 4.4169600 -0.0488580 0.4649010  
C 3.8433310 1.2195220 0.3278240  
N 2.5933360 1.4038170 -0.0963270  
H 5.4338550 -0.1854480 0.8059940  
N 0.6310720 0.4848730 -0.8217680  
H 0.2567560 1.4241870 -0.7609260  
N 4.0482210 -2.4174550 0.2093070  
H 3.3326170 -3.1265290 0.1929300  
H 4.8468340 -2.6083990 0.7913400  
N 4.5386660 2.3527320 0.6582890  
H 4.1368030 3.2162110 0.3282070

H 5.5432370 2.3056460 0.6865460  
C -3.4000870 -0.5077700 0.3475470  
O -3.5348940 -1.0352050 -0.9703220  
C -0.2722770 -0.5985730 -1.1199860  
C -0.9073510 -1.1552810 0.1687340  
C -1.9424070 -0.2109540 0.7761880  
H -3.8015970 -1.2217230 1.0738070  
H 0.3069420 -1.4016810 -1.5839590  
H -0.0990170 -1.2514670 0.8977480  
H -1.6846570 0.8116130 0.4692070  
O -1.8460420 -0.3194710 2.1844370  
H -2.4647530 0.3245910 2.5502550  
O -1.4982130 -2.4385870 -0.0651740

H -0.8220740 -3.1142440 0.0170280  
O -1.2187210 -0.0885150 -2.0390070  
H -3.2437380 -1.9549140 -0.9230100  
C -4.2162780 0.7734850 0.3656030  
H -5.2672210 0.5490740 0.1618080  
H -3.8252510 1.4401850 -0.4110080  
O -4.0603010 1.3569240 1.6560900  
H -4.2332230 2.2983990 1.6009470  
O -1.6345650 2.5479670 -1.3499670  
H -2.0912890 -0.4867040 -1.8642280  
H -1.4864800 3.2686490 -1.9655120  
H -1.5447820 1.7263650 -1.8614030

**pTS5\_6<sub>H2O</sub>**

H = -1079.110626 a.u.

G = -1079.182398 a.u.

C -1.9139220 0.1901040 -0.0158340  
N -2.4509230 -1.0489290 0.0059730

|   |            |            |            |                            |            |            |            |
|---|------------|------------|------------|----------------------------|------------|------------|------------|
| C | -3.7764520 | -1.1311770 | -0.1109360 | H                          | 3.7837100  | 1.6424730  | 0.8083800  |
| C | -4.5931390 | -0.0167490 | -0.2813660 | O                          | 4.4548610  | 1.5838600  | -1.1621770 |
| C | -3.9287370 | 1.2134840  | -0.3045090 | H                          | 4.9057430  | 2.4286290  | -1.1079230 |
| N | -2.6128050 | 1.3324030  | -0.1662390 | O                          | 0.3745250  | 2.1485890  | 1.6243120  |
| H | -5.6657220 | -0.0972270 | -0.3948220 | H                          | 1.9221060  | -0.4738220 | 1.7930800  |
| N | -0.5670060 | 0.3439780  | 0.0840470  | H                          | 0.8521750  | 2.9171930  | 1.3069110  |
| H | -0.1319960 | 1.7188120  | 0.8435740  | H                          | 0.8341060  | 0.7485920  | 1.9068340  |
| N | -4.3126140 | -2.4007090 | -0.0241720 | <b>pINT6<sub>H2O</sub></b> |            |            |            |
| H | -3.6442770 | -3.1396950 | -0.1799950 | H = -1079.153542 a.u.      |            |            |            |
| H | -5.2128020 | -2.5432810 | -0.4534200 | G = -1079.231221 a.u.      |            |            |            |
| N | -4.6228060 | 2.3865400  | -0.5112560 | C                          | -1.6527840 | -0.3872460 | -0.6257760 |
| H | -4.1036840 | 3.2168540  | -0.2686040 | N                          | -2.3486960 | -1.4103680 | -0.1595300 |
| H | -5.5962050 | 2.3951600  | -0.2530180 | C                          | -3.6025660 | -1.1342640 | 0.2344950  |
| C | 3.6235220  | -0.3189460 | -0.0236320 | C                          | -4.1362370 | 0.1522250  | 0.1713260  |
| O | 3.4561210  | -0.8162180 | 1.3087760  | C                          | -3.3036980 | 1.1433600  | -0.3434860 |
| C | 0.1679790  | -0.7347230 | 0.5055120  | N                          | -2.0670590 | 0.8646970  | -0.7810860 |
| C | 1.2450820  | -1.1939580 | -0.4779970 | H                          | -5.1396040 | 0.3713790  | 0.5107040  |
| C | 2.2972930  | -0.1300600 | -0.7973740 | N                          | -0.3134560 | -0.5870360 | -1.0289350 |
| H | 4.2289210  | -1.0221930 | -0.6019200 | H                          | -0.6259940 | 2.0032120  | -0.9726270 |
| H | -0.4013080 | -1.5877690 | 0.8799940  | N                          | -4.3128820 | -2.1849800 | 0.7368310  |
| H | 0.7021540  | -1.3775970 | -1.4094060 | H                          | -3.9253540 | -3.1011760 | 0.5781480  |
| H | 1.8566780  | 0.8467120  | -0.5548480 | H                          | -5.3124320 | -2.1119360 | 0.8173340  |
| O | 2.5689590  | -0.2032990 | -2.1821970 | N                          | -3.7081050 | 2.4423920  | -0.4735370 |
| H | 3.1786470  | 0.5142960  | -2.3910570 | H                          | -2.9672000 | 3.1127320  | -0.6184890 |
| O | 1.8958880  | -2.3960450 | -0.0475170 | H                          | -4.4722720 | 2.7552410  | 0.1024080  |
| H | 1.3299690  | -3.1476220 | -0.2373670 | C                          | 2.9379850  | -0.0792900 | 0.8217210  |
| O | 0.9479410  | -0.2743900 | 1.8432180  | O                          | 1.9230420  | -0.4851450 | 1.7225330  |
| H | 3.3013830  | -1.7671160 | 1.2189250  | C                          | 0.3600030  | -1.4591690 | -0.4074220 |
| C | 4.3599190  | 1.0007140  | 0.1290570  | C                          | 1.7987070  | -1.6859480 | -0.7876560 |
| H | 5.3478570  | 0.8225160  | 0.5633730  | C                          | 2.6224520  | -0.4081060 | -0.6542140 |

|                            |            |            |            |                             |            |            |            |
|----------------------------|------------|------------|------------|-----------------------------|------------|------------|------------|
| H                          | 3.8810420  | -0.5827560 | 1.0666290  | H                           | -0.5429540 | 1.9540690  | -0.6723000 |
| H                          | -0.0558660 | -2.0689910 | 0.4008860  | N                           | -4.6167710 | -1.9824700 | 0.7077110  |
| H                          | 1.8315190  | -1.9852500 | -1.8416220 | H                           | -4.2964090 | -2.9172060 | 0.5113830  |
| H                          | 2.0479940  | 0.4050110  | -1.1115360 | H                           | -5.6071890 | -1.8330440 | 0.7927190  |
| O                          | 3.8311030  | -0.6303010 | -1.3591010 | N                           | -3.5908040 | 2.6442720  | -0.1584380 |
| H                          | 4.3621540  | 0.1694740  | -1.2573740 | H                           | -2.8049240 | 3.2684610  | -0.2584740 |
| O                          | 2.3180340  | -2.7192900 | 0.0401270  | H                           | -4.3713420 | 2.9868770  | 0.3758750  |
| H                          | 3.2162010  | -2.9012860 | -0.2555820 | C                           | 2.7086700  | 0.2517430  | 0.7914840  |
| O                          | -0.3927240 | 1.2758860  | 1.8420700  | O                           | 1.4553460  | 0.6496490  | 1.2912250  |
| H                          | 1.9442020  | -1.4491370 | 1.7641170  | C                           | 0.2480480  | -1.3295030 | -0.1332100 |
| C                          | 3.1111570  | 1.4180540  | 1.0032550  | C                           | 1.6535910  | -1.6738820 | -0.5311120 |
| H                          | 3.4559440  | 1.6343150  | 2.0183290  | C                           | 2.5777090  | -0.4490840 | -0.5681400 |
| H                          | 2.1477160  | 1.9113230  | 0.8328620  | H                           | 3.1204540  | -0.4694200 | 1.5060730  |
| O                          | 4.0716650  | 1.8270190  | 0.0312690  | H                           | -0.0849790 | -1.6776370 | 0.8483710  |
| H                          | 4.1305230  | 2.7843290  | 0.0227430  | H                           | 1.6292220  | -2.0706520 | -1.5544580 |
| O                          | 0.1275590  | 2.6018630  | -0.7836790 | H                           | 2.1629760  | 0.2588150  | -1.3000630 |
| H                          | 0.3126670  | 0.6231730  | 1.9269460  | O                           | 3.8220950  | -0.9670890 | -1.0097180 |
| H                          | 0.7391480  | 2.4627720  | -1.5098890 | H                           | 4.5062300  | -0.3072740 | -0.8338390 |
| H                          | -0.1585290 | 1.7766820  | 1.0505910  | O                           | 2.1431560  | -2.6424870 | 0.3691740  |
| <b>pINT7<sub>H2O</sub></b> |            |            |            | H                           | 3.0690160  | -2.7803880 | 0.1392000  |
| H = -1002.743056 a.u.      |            |            |            | H                           | 1.0698800  | 1.3059260  | 0.6808670  |
| G = -1002.813284 a.u.      |            |            |            | C                           | 3.6222150  | 1.4787160  | 0.7186980  |
| C                          | -1.7770990 | -0.3411980 | -0.4729570 | H                           | 3.5965810  | 1.9897830  | 1.6848310  |
| N                          | -2.5737600 | -1.3261890 | -0.0926000 | H                           | 3.2418180  | 2.1718930  | -0.0371090 |
| C                          | -3.8112680 | -0.9664990 | 0.2911980  | O                           | 4.9612400  | 1.1629670  | 0.3372040  |
| C                          | -4.2356090 | 0.3623030  | 0.2978410  | H                           | 5.4311000  | 0.8265850  | 1.1044590  |
| C                          | -3.2995800 | 1.3109900  | -0.1091670 | O                           | 0.3243690  | 2.4138030  | -0.6129220 |
| N                          | -2.0686290 | 0.9604280  | -0.5115350 | H                           | 0.6815010  | 2.3726650  | -1.5034200 |
| H                          | -5.2331980 | 0.6435110  | 0.6070170  | <b>pTS7_8<sub>H2O</sub></b> |            |            |            |
| N                          | -0.4839640 | -0.6559310 | -0.9163720 | H = -1002.699716 a.u.       |            |            |            |

G = -1002.766728 a.u.

C 1.7967120 -0.0118450 -0.3962690  
N 2.1691580 1.0888980 0.2492070  
C 3.4446720 1.1327120 0.6501470  
C 4.3388540 0.0915180 0.4045940  
C 3.8235410 -1.0038620 -0.2884040  
N 2.5506620 -1.0619580 -0.6975040  
H 5.3695520 0.1325020 0.7305570  
N 0.4746950 -0.1007810 -0.8612050  
H 0.0465790 -1.2475690 -0.8362930  
N 3.8152250 2.2501940 1.3509790  
H 3.1788230 3.0293900 1.2880360  
H 4.7942520 2.4750550 1.4089040  
N 4.6067320 -2.0749840 -0.6276550  
H 4.1011070 -2.8954350 -0.9243210  
H 5.4523040 -2.2330830 -0.1057370  
C -2.6756220 -0.0113680 0.8132370  
O -1.3027720 -0.2430230 1.0256350  
C -0.4311320 0.7445470 -0.3830230  
C -1.7102160 1.0386440 -1.1509500  
C -2.8430840 0.1075310 -0.7045870  
H -2.9597290 0.9403400 1.2746260  
H -0.0822830 1.5755590 0.2233990  
H -1.5103930 0.9137280 -2.2203700  
H -2.7039430 -0.8797360 -1.1636880  
O -4.0611340 0.6871040 -1.1127130  
H -4.7660100 0.2606620 -0.6089910  
O -2.0493640 2.3758450 -0.8568540  
H -2.9845690 2.4761560 -1.0740210  
H -1.0484430 -1.2510940 0.5785270

C -3.5006510 -1.1389240 1.4140410  
H -3.3969170 -1.1337710 2.5026740  
H -3.1391110 -2.0989650 1.0268120  
O -4.8526930 -0.9122270 1.0216500  
H -5.4253040 -1.5663330 1.4269740  
O -0.5601890 -2.1694760 -0.1908240  
H -1.0904320 -2.8064880 -0.6717030

**pINT8<sub>H2O</sub>**

H = -1002.75627 a.u.

G = -1002.825536 a.u.

C -1.6365090 -0.2182410 -0.4875870  
N -2.0702780 -1.1935760 0.3009980  
C -3.3371800 -1.0838820 0.7214280  
C -4.1668830 -0.0272680 0.3426080  
C -3.5885130 0.9396970 -0.4781170  
N -2.3130630 0.8652180 -0.8857380  
H -5.1930260 0.0444190 0.6758810  
N -0.3500450 -0.3164760 -0.9806970  
H -0.0608630 0.5299270 -1.4572390  
N -3.7668190 -2.0617740 1.5712950  
H -3.1828110 -2.8804130 1.6348920  
H -4.7542310 -2.1879200 1.7138500  
N -4.2996510 2.0130350 -0.9343990  
H -3.7676850 2.7506490 -1.3679350  
H -5.1436660 2.2779550 -0.4559150  
C 2.5327150 0.0530290 0.7685620  
O 1.1274240 -0.1264570 0.8527360  
C 0.6743450 -0.9793800 -0.2327780  
C 1.9173140 -1.2672280 -1.0830650  
C 2.8357260 -0.1020960 -0.7212640

|                             |            |            |            |   |            |            |            |
|-----------------------------|------------|------------|------------|---|------------|------------|------------|
| H                           | 3.0537300  | -0.7430860 | 1.3182950  | H | 5.5301820  | 1.0497440  | 2.1872100  |
| H                           | 0.2668860  | -1.8943640 | 0.1905020  | H | 6.1318930  | -0.4459160 | 1.5895870  |
| H                           | 1.6678100  | -1.3078560 | -2.1468940 | N | 2.5281360  | -2.0129260 | -1.4701910 |
| H                           | 2.5138090  | 0.8079660  | -1.2481020 | H | 1.5578600  | -2.0947540 | -1.7423520 |
| O                           | 4.1711200  | -0.4239470 | -1.0198730 | H | 3.0259550  | -2.8819920 | -1.3706370 |
| H                           | 4.7245360  | 0.2345460  | -0.5821440 | C | -3.3513510 | -0.6205230 | 0.9960270  |
| O                           | 2.4820480  | -2.4827000 | -0.6462220 | O | -2.9001620 | -1.9556830 | 1.1526120  |
| H                           | 3.4236160  | -2.4448030 | -0.8540400 | C | -0.5019020 | -1.4350240 | -0.0393300 |
| H                           | 0.2481280  | 1.6981700  | 0.5730440  | C | -1.0300830 | -0.0438470 | 0.2262760  |
| C                           | 2.9377200  | 1.4108970  | 1.3118690  | C | -2.5223230 | 0.0796950  | -0.0836720 |
| H                           | 2.6647180  | 1.5128090  | 2.3658240  | H | -3.1679760 | -0.1197750 | 1.9485610  |
| H                           | 2.4434720  | 2.2047790  | 0.7478840  | H | 0.0353360  | -1.8997570 | 0.8059110  |
| O                           | 4.3449280  | 1.5676920  | 1.1180870  | H | -0.5234480 | 0.5963850  | -0.4982050 |
| H                           | 4.8076590  | 1.2267090  | 1.8866030  | H | -2.7035090 | -0.4155940 | -1.0518950 |
| O                           | 0.0841060  | 2.5034120  | 0.0639980  | O | -2.8007030 | 1.4636310  | -0.1851820 |
| H                           | -0.8025080 | 2.3683520  | -0.2944500 | H | -3.7462550 | 1.6033880  | -0.0445530 |
| <b>pINT3<sub>2H2O</sub></b> |            |            |            | O | -0.7370900 | 0.3439180  | 1.5408950  |
| H = -1155.575945 a.u.       |            |            |            | H | -0.0896400 | 1.0616300  | 1.4942370  |
| G = -1155.656446 a.u.       |            |            |            | O | -0.6147440 | -1.9908250 | -1.1101570 |
| C                           | 2.3226300  | 1.0411950  | 0.2587030  | H | -3.0149860 | -2.4275200 | 0.3197550  |
| N                           | 3.4069540  | 1.1159860  | 1.0267950  | C | -4.8457260 | -0.6396560 | 0.6950130  |
| C                           | 4.2502340  | 0.0785580  | 0.9613300  | H | -5.3579680 | -1.1631140 | 1.5072680  |
| C                           | 4.0188440  | -1.0285630 | 0.1442070  | H | -5.0186340 | -1.1861970 | -0.2430230 |
| C                           | 2.8532370  | -0.9969780 | -0.6177280 | O | -5.3032640 | 0.7025930  | 0.5795660  |
| N                           | 1.9983290  | 0.0429400  | -0.5774600 | H | -6.2476820 | 0.7169200  | 0.4111070  |
| H                           | 4.6968180  | -1.8702990 | 0.1131570  | O | 0.1664860  | 0.2528010  | -2.8906150 |
| N                           | 1.4195600  | 2.0705150  | 0.3815710  | H | -0.3566900 | -0.5405410 | -2.7292590 |
| H                           | 0.8185190  | 2.2911650  | -0.4173590 | H | 0.8692930  | 0.2106990  | -2.2167760 |
| H                           | 1.8026910  | 2.8760720  | 0.8549500  | O | -0.6000910 | 2.6806150  | -1.6563350 |
| N                           | 5.3429530  | 0.1492170  | 1.7758140  | H | -1.4516540 | 2.5028540  | -1.2320280 |

H -0.5064500 1.9909490 -2.3325870

**pTS3\_4<sub>2</sub>H<sub>2</sub>O**

H = -1155.555866 a.u.

G = -1155.632223 a.u.

C -2.0888530 -0.0728470 -0.5404560

N -2.3244360 -1.3302460 -0.8638030

C -3.4670680 -1.8386940 -0.3668150

C -4.3259150 -1.0770670 0.4253910

C -3.9439100 0.2407270 0.6749520

N -2.8038710 0.7577500 0.1783920

H -5.2424280 -1.4892000 0.8264900

N -0.8389400 0.4560120 -1.0368390

H -0.8727960 1.6001030 -1.1581570

H -0.6183420 0.0091080 -1.9307540

N -3.7154190 -3.1440190 -0.6603320

H -3.1282130 -3.5742180 -1.3562260

H -4.6341190 -3.5254560 -0.5164490

N -4.7093980 1.0973240 1.4028580

H -4.2729680 1.9657290 1.6699040

H -5.4362390 0.7362120 1.9961760

C 3.0112860 -1.0095700 0.6492650

O 2.1893030 -1.1349240 1.7901710

C 0.3374180 0.0988270 -0.1013970

C 1.5891970 0.5734670 -0.8287980

C 2.8805800 0.3701060 -0.0176200

H 2.7729730 -1.7872110 -0.0913600

H 0.3329080 -0.9984160 -0.0713680

H 1.5129990 1.6507100 -1.0245360

H 2.9108080 1.1326880 0.7718160

O 3.9058610 0.6145430 -0.9728470

H 4.6702280 0.0526330 -0.7858370

O 1.6319170 -0.1465850 -2.0463650

H 2.5254800 -0.0270500 -2.3936050

O 0.1709730 0.6199630 1.1352550

H 1.4778870 -0.4702110 1.7927590

C 4.4188670 -1.2649780 1.1821200

H 4.3791110 -2.1701230 1.7929420

H 4.7180500 -0.4220550 1.8165590

O 5.3236720 -1.4268200 0.0887570

H 6.1978660 -1.6353950 0.4243220

O 0.4603280 3.0009150 0.8992250

H 0.3026100 1.7462980 1.1166080

H 0.1539470 3.5444020 1.6266290

O -0.7964870 2.9894220 -1.1498590

H -0.3253120 3.4161460 -1.8689830

H -0.2341360 3.1356140 -0.1933940

**pINT4<sub>2</sub>H<sub>2</sub>O**

H = -1155.579048 a.u.

G = -1155.659954 a.u.

C 2.0550090 -0.0154290 0.2834520

N 3.0644640 0.4657010 1.0112640

C 4.2209460 -0.1984140 0.9014910

C 4.3727510 -1.3062190 0.0661520

C 3.2379530 -1.6988950 -0.6422110

N 2.0646270 -1.0577220 -0.5312740

H 5.3151710 -1.8291360 -0.0243360

N 0.8689040 0.7122840 0.3856090

H 1.4622160 2.3673200 -0.4895390

H 0.7691960 1.1133470 1.3137020

N 5.2484830 0.2517080 1.6859190



H 5.1205430 1.1642340 2.0936530  
 H 6.1894430 -0.0090730 1.4438030  
 N 3.2572740 -2.7453770 -1.5174320  
 H 2.3589510 -3.0618930 -1.8470460  
 H 3.9967170 -3.4240760 -1.4589870  
 C -3.1209400 -1.1210040 -0.0749040  
 O -2.5444170 -1.5611090 -1.2879990  
 C -0.3730890 0.1416760 -0.1216430  
 C -1.5236530 0.7839470 0.6437420  
 C -2.9254500 0.3891850 0.1424940  
 H -2.6939650 -1.6630880 0.7809930  
 H -0.3717980 -0.9398020 0.0384740  
 H -1.4504870 1.8765950 0.5321070  
 H -3.1117680 0.8903790 -0.8165960  
 O -3.7953680 0.9230180 1.1327410  
 H -4.5288330 0.3135120 1.2916870  
 O -1.3574390 0.4196570 1.9978360  
 H -2.1744190 0.6807680 2.4413380  
 O -0.5172920 0.3303560 -1.5058870  
 H -1.8622120 -0.9445550 -1.5957660  
 C -4.5901600 -1.5103490 -0.2104050  
 H -4.6234880 -2.5485720 -0.5495900  
 H -5.0619390 -0.8742490 -0.9692390  
 O -5.2396440 -1.3644280 1.0525370  
 H -6.1487160 -1.6631510 0.9827940  
 O -0.9780130 3.0567810 -1.7860730  
 H -0.6757190 1.2761910 -1.6909890  
 H -1.2161880 3.4658700 -2.6203130  
 O 1.5600990 3.2557790 -0.8780830  
 H 2.1464220 3.7367660 -0.2911360

H -0.1089980 3.4190430 -1.5331930

**pINT5<sub>2H2O</sub>**

H = -1155.578772 a.u.

G = -1155.656980 a.u.

C -2.1603250 -0.0745020 0.3163210  
 N -2.5213350 1.1771650 0.0321100  
 C -3.8106770 1.3546000 -0.2735090  
 C -4.7332210 0.3095490 -0.2902820  
 C -4.2260670 -0.9526340 0.0268810  
 N -2.9403540 -1.1597180 0.3197460  
 H -5.7749990 0.4663770 -0.5344950  
 N -0.8545310 -0.2906030 0.6725590  
 H 0.9261730 -2.6747320 -0.1799980  
 H -0.5731890 -1.2599900 0.7948000  
 N -4.1738380 2.6349320 -0.6095050  
 H -3.5090920 3.3470340 -0.3505490  
 H -5.1453970 2.8854370 -0.5310620  
 N -5.0379900 -2.0552380 0.0856310  
 H -4.5603380 -2.9420830 0.1209980  
 H -5.9158070 -2.0325830 -0.4050810  
 C 3.4895490 0.9309580 -0.1121930  
 O 2.7639010 2.0897510 -0.4958660  
 C 0.1642370 0.6753850 0.4221620  
 C 1.4180760 0.3278710 1.2624440  
 C 2.5956880 -0.2006740 0.4428200  
 H 4.2165510 1.1840260 0.6685960  
 H -0.1971180 1.6585420 0.7313460  
 H 1.1404930 -0.4550830 1.9699870  
 H 2.2163670 -0.8011590 -0.3889350  
 O 3.3558800 -1.0295820 1.3165410

|                                         |            |            |            |   |            |            |            |
|-----------------------------------------|------------|------------|------------|---|------------|------------|------------|
| H                                       | 4.1418290  | -1.3025100 | 0.8246620  | H | -3.5764770 | -3.2169550 | 0.6508450  |
| O                                       | 1.7935950  | 1.5020560  | 1.9921380  | H | -5.1991350 | -2.7050360 | 0.6274270  |
| H                                       | 2.3635840  | 1.2298350  | 2.7174050  | N | -4.8954920 | 2.1230500  | -0.5248150 |
| O                                       | 0.4181040  | 0.7048900  | -0.9874710 | H | -4.3761490 | 2.9851140  | -0.5933690 |
| H                                       | 2.4654370  | 2.5034580  | 0.3257510  | H | -5.7863210 | 2.1835340  | -0.0597660 |
| C                                       | 4.2323750  | 0.4596620  | -1.3491000 | C | 3.5514270  | -0.6708980 | 0.1394080  |
| H                                       | 4.9221240  | 1.2368210  | -1.6903680 | O | 3.0017140  | -1.7335730 | 0.9181020  |
| H                                       | 3.5006000  | 0.2526110  | -2.1390370 | C | 0.1290650  | -0.8195340 | -0.3005620 |
| O                                       | 4.9306400  | -0.7244990 | -0.9780230 | C | 1.3645430  | -0.7936340 | -1.2153890 |
| H                                       | 5.2536980  | -1.1716120 | -1.7625390 | C | 2.5220000  | 0.0854220  | -0.7397420 |
| O                                       | 0.6319960  | -1.8960670 | -1.9110840 | H | 4.3084120  | -1.0761780 | -0.5400800 |
| H                                       | 1.0788030  | 1.3917360  | -1.1641930 | H | -0.3560510 | -1.7934290 | -0.3587680 |
| H                                       | -0.1537610 | -2.2390560 | -2.3429500 | H | 1.0066410  | -0.3697980 | -2.1554010 |
| O                                       | 0.8877290  | -2.7526040 | 0.7865260  | H | 2.1146450  | 0.9347910  | -0.1805970 |
| H                                       | 1.7852900  | -2.5981000 | 1.1024970  | O | 3.1813150  | 0.5595270  | -1.9020180 |
| H                                       | 0.4425060  | -0.9575770 | -1.7259730 | H | 3.9004830  | 1.1291680  | -1.6022370 |
| <b>pTS5_6<sub>2</sub>H<sub>2</sub>O</b> |            |            |            | O | 1.8077700  | -2.1400780 | -1.4416000 |
| H = -1155.535340 a.u.                   |            |            |            | H | 2.2517880  | -2.1688490 | -2.2935590 |
| G = -1155.610573 a.u.                   |            |            |            | O | 0.5820450  | -0.7727750 | 1.1823180  |
| C                                       | -2.0462630 | 0.0746510  | -0.2825450 | H | 2.7723050  | -2.4324970 | 0.2879400  |
| N                                       | -2.4920310 | -1.1275680 | 0.1271080  | C | 4.2102290  | 0.2827670  | 1.1193650  |
| C                                       | -3.8032670 | -1.2406450 | 0.3390620  | H | 5.0044520  | -0.2338530 | 1.6657650  |
| C                                       | -4.6939940 | -0.1850870 | 0.1579150  | H | 3.4527040  | 0.6426590  | 1.8258770  |
| C                                       | -4.1177040 | 1.0159370  | -0.2666720 | O | 4.7300420  | 1.3566010  | 0.3430610  |
| N                                       | -2.8144710 | 1.1596120  | -0.4847270 | H | 4.9829420  | 2.0798260  | 0.9200340  |
| H                                       | -5.7559530 | -0.2877060 | 0.3351630  | O | 0.8941950  | 1.5245160  | 1.9195910  |
| N                                       | -0.7154840 | 0.2547210  | -0.5324330 | H | 1.4461050  | -1.2366990 | 1.3061410  |
| H                                       | 0.6596990  | 2.1069360  | 1.0417780  | H | 0.3006220  | 1.8057390  | 2.6215960  |
| H                                       | -0.2583950 | 1.5792320  | -0.4767190 | O | 0.1895580  | 2.5518410  | -0.1581470 |
| N                                       | -4.2353950 | -2.4678210 | 0.7991210  | H | 0.7168340  | 2.9466360  | -0.8548360 |

H 0.6716280 0.2710560 1.5474940

**pINT6<sub>2H2O</sub>**

H = -1155.569625 a.u.

G = -1155.650160 a.u.

C -1.8185130 -0.3740680 -0.6403740

N -2.4210820 -1.4300130 -0.1228090

C -3.6244100 -1.2096980 0.4296920

C -4.2118170 0.0546210 0.4496940

C -3.4875770 1.0828060 -0.1476600

N -2.2897340 0.8671250 -0.7121560

H -5.1803600 0.2270930 0.8996220

N -0.5286030 -0.5162410 -1.2049750

H 0.9326590 2.7611480 -0.3113220

H -0.9217540 1.9813670 -1.2566390

N -4.2269160 -2.2927750 0.9968190

H -3.8255760 -3.1917940 0.7846890

H -5.2076150 -2.2592900 1.2152940

N -3.9748160 2.3563670 -0.2325450

H -3.3132100 3.0700080 -0.4948870

H -4.7058980 2.6338650 0.4004190

C 2.9614660 -0.7148390 0.8096870

O 1.9657010 -1.3498500 1.6003610

C 0.2104190 -1.4335290 -0.7418960

C 1.6334960 -1.5205910 -1.2147490

C 2.4769070 -0.3883860 -0.6136100

H 3.8269420 -1.3782010 0.7002430

H -0.1309060 -2.1377500 0.0218710

H 1.6448710 -1.3796040 -2.3007070

H 1.8589430 0.5189950 -0.6100210

O 3.6018250 -0.2313790 -1.4584490

H 4.1449080 0.4610640 -1.0554090

O 2.1436830 -2.7999970 -0.8643480

H 3.0259340 -2.8757990 -1.2420200

O -0.2059020 0.6448910 1.7059020

H 1.8908950 -2.2602660 1.2900840

C 3.3702740 0.5563080 1.5633170

H 4.0869630 0.3102840 2.3489500

H 2.4754740 0.9709160 2.0362600

O 3.9550080 1.5125010 0.6955100

H 3.2586890 2.1583580 0.4966110

O 1.4975740 2.8355970 0.4986820

H 0.4171160 -0.0828260 1.8291770

H 1.3874730 3.7319960 0.8246110

O -0.1115660 2.4351710 -1.5809350

H 0.2587090 1.7752290 -2.1767750

H 0.3317410 1.3827630 1.3912030

**pINT7<sub>2H2O</sub>**

H = -1079.157456 a.u.

G = -1079.232927 a.u.

C -1.8174030 0.3180080 0.3935160

N -2.5699470 1.3615570 0.0909830

C -3.8089080 1.0829750 -0.3520570

C -4.2759980 -0.2248750 -0.4836930

C -3.3823060 -1.2378710 -0.1419000

N -2.1460040 -0.9701830 0.3094790

H -5.2758560 -0.4423960 -0.8343450

N -0.5170280 0.5542570 0.8858400

H 0.6995460 -2.3296510 0.9107150

H 0.1918690 -0.6331610 2.1933610

N -4.5691660 2.1590010 -0.6906540

|                                         |            |            |            |                       |            |            |            |
|-----------------------------------------|------------|------------|------------|-----------------------|------------|------------|------------|
| H                                       | -4.2193880 | 3.0641980  | -0.4209840 | G = -1079.199853 a.u. |            |            |            |
| H                                       | -5.5589600 | 2.0545470  | -0.8298850 | C                     | -1.8531020 | -0.0942770 | -0.4655900 |
| N                                       | -3.7217230 | -2.5579090 | -0.2120660 | N                     | -2.1705830 | -1.2718320 | 0.0377890  |
| H                                       | -2.9640420 | -3.2192410 | -0.1387300 | C                     | -3.4115380 | -1.3688800 | 0.5400690  |
| H                                       | -4.5033770 | -2.8277070 | -0.7851110 | C                     | -4.3035940 | -0.2956180 | 0.5158980  |
| C                                       | 2.6394670  | 0.0124830  | -1.0782040 | C                     | -3.8369270 | 0.8855760  | -0.0585920 |
| O                                       | 1.3502540  | -0.2722050 | -1.5687720 | N                     | -2.5938590 | 0.9956740  | -0.5577100 |
| C                                       | 0.2201190  | 1.3420860  | 0.2156820  | H                     | -5.3038140 | -0.3775740 | 0.9195700  |
| C                                       | 1.6294400  | 1.6275780  | 0.6397060  | N                     | -0.5494130 | 0.0557250  | -0.9970090 |
| C                                       | 2.5966090  | 0.4568190  | 0.3917620  | H                     | 0.5698380  | 2.3091320  | -0.1259110 |
| H                                       | 3.0392360  | 0.8374970  | -1.6750300 | H                     | -0.2463390 | 1.0778710  | -1.2798760 |
| H                                       | -0.1291050 | 1.8448710  | -0.6885010 | N                     | -3.7364950 | -2.5658370 | 1.0981770  |
| H                                       | 1.6335760  | 1.8003180  | 1.7247010  | H                     | -3.0977180 | -3.3292950 | 0.9459850  |
| H                                       | 2.2854100  | -0.3861180 | 1.0235720  | H                     | -4.6966500 | -2.7846840 | 1.2988480  |
| O                                       | 3.8489620  | 0.9718740  | 0.8158410  | N                     | -4.6243100 | 1.9920340  | -0.1786760 |
| H                                       | 4.5403390  | 0.3792410  | 0.4926370  | H                     | -4.1566660 | 2.8469550  | -0.4342790 |
| O                                       | 2.0571990  | 2.7782620  | -0.0518070 | H                     | -5.4573160 | 2.0692230  | 0.3792630  |
| H                                       | 3.0064940  | 2.8458320  | 0.1077520  | C                     | 2.5782830  | -0.4920860 | 0.8563550  |
| H                                       | 1.0042870  | -1.0484880 | -1.0847760 | O                     | 1.2145000  | -0.4623940 | 1.1848570  |
| C                                       | 3.5073040  | -1.2288230 | -1.2764490 | C                     | 0.3678360  | -0.8451470 | -0.8367690 |
| H                                       | 3.5112610  | -1.4788790 | -2.3412040 | C                     | 1.7209140  | -0.7137910 | -1.4745220 |
| H                                       | 3.0599820  | -2.0616240 | -0.7192790 | C                     | 2.7219940  | 0.0351780  | -0.5747880 |
| O                                       | 4.8306260  | -0.9636470 | -0.8115190 | H                     | 2.9289050  | -1.5304780 | 0.8851310  |
| H                                       | 5.3642880  | -1.7569610 | -0.8878270 | H                     | 0.0824710  | -1.8154290 | -0.4481780 |
| O                                       | 0.3663380  | -2.3830360 | 0.0018550  | H                     | 1.6177100  | -0.1519780 | -2.4109680 |
| H                                       | -0.5417740 | -2.0426180 | 0.0994400  | H                     | 2.4791500  | 1.1042300  | -0.5993530 |
| O                                       | 0.7167570  | -1.3521700 | 2.5985480  | O                     | 3.9911640  | -0.2179750 | -1.1471540 |
| H                                       | 0.3122770  | -1.5496280 | 3.4450640  | H                     | 4.6515040  | -0.0079320 | -0.4728340 |
| <b>pTS7_8<sub>2</sub>H<sub>2</sub>O</b> |            |            |            | O                     | 2.1671180  | -2.0274960 | -1.7201080 |
| H = -1079.127690 a.u.                   |            |            |            | H                     | 3.1273560  | -1.9636390 | -1.8127720 |

H 0.9259030 0.5622600 1.2441870  
C 3.3811050 0.3392850 1.8509740  
H 3.2661700 -0.0905620 2.8504790  
H 2.9931820 1.3624870 1.8464410  
O 4.7522970 0.3029850 1.4398260  
H 5.2573340 0.9294580 1.9614770  
O 0.7094920 1.9482750 1.1249810  
H 0.0244140 2.2986950 1.6962850  
O 0.4812470 2.3552760 -1.2403050  
H 0.0408220 3.1601090 -1.5164760

**pINT8<sub>2H2O</sub>**

H = -1079.170086 a.u.

G = -1079.243984 a.u.

C -1.6943360 -0.2192870 -0.4086730  
N -2.1837500 -1.3168020 0.1606640  
C -3.4791030 -1.2801180 0.4932290  
C -4.2922340 -0.1733200 0.2387930  
C -3.6596820 0.9243340 -0.3407570  
N -2.3523830 0.9266130 -0.6432940  
H -5.3446290 -0.1635380 0.4872860  
N -0.3814700 -0.2357150 -0.8131840  
H 0.6549780 2.5900320 -0.4624990  
H -0.0492340 0.6425690 -1.2058210  
N -3.9618400 -2.3917010 1.1214490  
H -3.3771510 -3.2113970 1.0789430  
H -4.9559870 -2.5373840 1.1629020  
N -4.3450140 2.0655580 -0.6523510  
H -3.7865520 2.8663850 -0.9009470  
H -5.2246890 2.2443620 -0.1986500  
C 2.5740480 -0.2032330 0.8380470

O 1.1601770 -0.2707850 0.9610580  
C 0.5980380 -1.0326970 -0.1419000  
C 1.7882800 -1.4217700 -1.0252770  
C 2.8418920 -0.3799180 -0.6574810  
H 3.0474970 -1.0268650 1.3866900  
H 0.1149100 -1.9218830 0.2562180  
H 1.5145260 -1.4034910 -2.0834900  
H 2.6378540 0.5628500 -1.1784800  
O 4.1282620 -0.8744550 -0.9533820  
H 4.7600620 -0.3102520 -0.4920540  
O 2.2183410 -2.7067520 -0.6318690  
H 3.1657570 -2.7500020 -0.8111830  
H 0.1454830 1.3954690 1.2705200  
C 3.0714000 1.1256870 1.3666030  
H 2.8771780 1.2153610 2.4402980  
H 2.5647100 1.9367750 0.8331690  
O 4.4720390 1.1339400 1.0945100  
H 4.8401810 1.9863880 1.3339600  
O -0.2452530 2.2629350 1.0749640  
H -1.1008230 2.0483520 0.6748580  
O 1.1008030 2.3753190 -1.3045790  
H 0.9223690 3.1009130 -1.9058380

**pRINT3<sub>H2O</sub>**

H = -1079.151248 a.u.

G = -1079.231621 a.u.

C 2.6100860 -0.9822740 -0.5289750  
O 1.7193750 -2.0176220 -0.1476050  
C 0.5364460 1.1403750 -0.2916250  
C 1.2249310 0.6013420 0.9509200  
C 2.6295000 0.1135210 0.5436230

|   |            |            |            |                              |            |            |            |
|---|------------|------------|------------|------------------------------|------------|------------|------------|
| H | 2.2176020  | -0.5748580 | -1.4675430 | H                            | -4.2578680 | 0.6510720  | -2.3007850 |
| H | 0.6417040  | -0.2303670 | 1.3485680  | O                            | -2.0822860 | 3.3431140  | -0.7944540 |
| H | 3.1033810  | -0.2762180 | 1.4522030  | H                            | -2.4520950 | 2.4549700  | -0.9277110 |
| O | 3.4393910  | 1.2130170  | 0.1467650  | H                            | -1.1875840 | 3.3014600  | -1.1472370 |
| H | 2.9807460  | 1.7203350  | -0.5367520 | <b>pRTS3_4<sub>H2O</sub></b> |            |            |            |
| O | 1.3221390  | 1.5782480  | 1.9539870  | H = -1079.140185 a.u.        |            |            |            |
| H | 1.8183330  | 2.3257740  | 1.6004580  | G = -1079.212567 a.u.        |            |            |            |
| C | 4.0041800  | -1.5463710 | -0.8056820 | C                            | 2.7584460  | 1.2358610  | 0.0416980  |
| H | 3.8963270  | -2.4007780 | -1.4761020 | O                            | 1.8358670  | 2.2940360  | -0.1774400 |
| H | 4.4300780  | -1.9130090 | 0.1432990  | C                            | 0.5769230  | -0.7614130 | 0.4313600  |
| O | 4.8665170  | -0.6327650 | -1.4359000 | C                            | 1.0320820  | -0.3576270 | -0.9758760 |
| H | 4.8887070  | 0.1701230  | -0.9027420 | C                            | 2.4969230  | 0.0976890  | -0.9507460 |
| O | 0.7674570  | 2.2556850  | -0.6966780 | H                            | 2.5809010  | 0.8737120  | 1.0587890  |
| H | 2.1052580  | -2.5025980 | 0.5892400  | H                            | 0.3966530  | 0.4482990  | -1.3500400 |
| H | -0.1278780 | 0.4551910  | -0.8489520 | H                            | 2.7570190  | 0.4407810  | -1.9607840 |
| C | -2.1690560 | 0.3686140  | 0.8185450  | O                            | 3.3374430  | -1.0172230 | -0.6830120 |
| N | -1.8489040 | -0.8194570 | 1.3432740  | H                            | 2.9386320  | -1.4526890 | 0.1023170  |
| C | -2.2724380 | -1.8926820 | 0.6654410  | O                            | 0.8891030  | -1.4507290 | -1.8646190 |
| C | -2.9909340 | -1.7994980 | -0.5288240 | H                            | 1.6626550  | -2.0146260 | -1.7357730 |
| C | -3.2471000 | -0.5082670 | -0.9867280 | C                            | 4.1929090  | 1.7560910  | -0.0493660 |
| N | -2.8387150 | 0.5834760  | -0.3269020 | H                            | 4.2809180  | 2.6291630  | 0.6006760  |
| H | -3.3287580 | -2.6755840 | -1.0645520 | H                            | 4.3768180  | 2.0887600  | -1.0861170 |
| N | -1.7341390 | 1.4662870  | 1.4774860  | O                            | 5.1601190  | 0.8234460  | 0.3627430  |
| H | -1.1476950 | 1.3549570  | 2.2884560  | H                            | 4.9355010  | -0.0234120 | -0.0438930 |
| H | -1.8603640 | 2.3805690  | 1.0592600  | O                            | 1.4093710  | -1.6769620 | 0.9908900  |
| N | -1.9905260 | -3.1039460 | 1.2314730  | H                            | 2.0781600  | 2.7485950  | -0.9905750 |
| H | -1.3187110 | -3.0893540 | 1.9820360  | H                            | 0.3906970  | 0.1244920  | 1.0515640  |
| H | -2.0032820 | -3.9236670 | 0.6482480  | C                            | -1.9299570 | -0.5049480 | 0.1410580  |
| N | -3.8973360 | -0.2813390 | -2.1692490 | N                            | -2.6913020 | -0.7140050 | -0.9156270 |
| H | -4.4449870 | -1.0291410 | -2.5610500 | C                            | -3.7359130 | 0.1267570  | -1.0414490 |

|                             |            |            |            |                             |            |            |            |
|-----------------------------|------------|------------|------------|-----------------------------|------------|------------|------------|
| C                           | -3.9761310 | 1.1463970  | -0.1221250 | H                           | 1.6549470  | -1.9144590 | -2.0058580 |
| C                           | -3.0820590 | 1.2493040  | 0.9447800  | C                           | 4.3203750  | 1.5095430  | 0.1425680  |
| N                           | -2.0420250 | 0.4064990  | 1.0836460  | H                           | 4.4367810  | 2.2909190  | 0.8957450  |
| H                           | -4.8125370 | 1.8238010  | -0.2302810 | H                           | 4.5247170  | 1.9598420  | -0.8437700 |
| N                           | -0.8240930 | -1.4097840 | 0.2840300  | O                           | 5.2507770  | 0.4983860  | 0.4433810  |
| H                           | -0.7824660 | -2.0088090 | -0.5456860 | H                           | 5.0424900  | -0.2623540 | -0.1124910 |
| H                           | -0.8472890 | -2.0623830 | 1.2568980  | O                           | 1.3209940  | -1.8557710 | 0.7354420  |
| N                           | -4.5533330 | -0.1022120 | -2.1053460 | H                           | 2.1939820  | 2.6619710  | -0.6829620 |
| H                           | -4.2083200 | -0.7353930 | -2.8092070 | H                           | 0.4500160  | 0.0195900  | 0.9718450  |
| H                           | -5.2047270 | 0.6069930  | -2.3944430 | C                           | -1.9250470 | -0.4161820 | 0.0090950  |
| N                           | -3.1903630 | 2.2147090  | 1.8925300  | N                           | -3.0454360 | -0.9153900 | -0.5124730 |
| H                           | -4.0337600 | 2.7546620  | 1.9751110  | C                           | -4.0888760 | -0.0787980 | -0.5494310 |
| H                           | -2.5916700 | 2.1348580  | 2.6986500  | C                           | -4.0182520 | 1.2341990  | -0.0786640 |
| O                           | -0.2807950 | -2.6246160 | 2.3578180  | C                           | -2.7833630 | 1.6346200  | 0.4286750  |
| H                           | -0.3067920 | -3.5786210 | 2.4548610  | N                           | -1.7266240 | 0.8102660  | 0.4774510  |
| H                           | 0.6892050  | -2.2768930 | 1.8662470  | H                           | -4.8677170 | 1.9025070  | -0.1165690 |
| <b>pRINT4<sub>H2O</sub></b> |            |            |            | N                           | -0.8648360 | -1.3112290 | 0.0982370  |
| H = -1079.167944 a.u.       |            |            |            | H                           | -0.9285920 | -2.0360830 | -0.6104010 |
| G = -1079.242569 a.u.       |            |            |            | H                           | -1.0765510 | -2.1422400 | 2.0136890  |
| C                           | 2.8664680  | 1.0362970  | 0.1687710  | N                           | -5.2531400 | -0.5985400 | -1.0467080 |
| O                           | 1.9860290  | 2.1472890  | 0.1037110  | H                           | -5.1584780 | -1.4640650 | -1.5546010 |
| C                           | 0.4933330  | -0.8105030 | 0.2645240  | H                           | -5.9644800 | 0.0368880  | -1.3668830 |
| C                           | 1.0762640  | -0.3279320 | -1.0671910 | N                           | -2.5583680 | 2.9060730  | 0.8719540  |
| C                           | 2.5596940  | 0.0512870  | -0.9641650 | H                           | -3.3420370 | 3.4890180  | 1.1111530  |
| H                           | 2.6775720  | 0.5506160  | 1.1313380  | H                           | -1.6994930 | 3.0497660  | 1.3797590  |
| H                           | 0.4983450  | 0.5487640  | -1.3662290 | O                           | -0.4828100 | -2.3168570 | 2.7595920  |
| H                           | 2.8473960  | 0.5102700  | -1.9187110 | H                           | -0.9018850 | -2.9820610 | 3.3084720  |
| O                           | 3.3658290  | -1.1197160 | -0.8553530 | H                           | 0.9638890  | -2.1746320 | 1.5810950  |
| H                           | 3.0142180  | -1.6234610 | -0.1028510 | <b>pRINT5<sub>H2O</sub></b> |            |            |            |
| O                           | 0.9054480  | -1.3101120 | -2.0687820 | H = -1079.161664 a.u.       |            |            |            |

|                                    |                                    |
|------------------------------------|------------------------------------|
| G = -1079.233796 a.u.              | H 0.2385980 3.8980740 -0.2266160   |
| C 2.1756040 -1.3417510 0.1522340   | N -5.2443170 -0.2104600 -0.0347160 |
| O 1.4066290 -2.0293740 1.1287980   | H -5.4976620 0.7547090 0.1085930   |
| C 0.4408040 1.2438490 -0.6458470   | H -5.8324350 -0.8972340 0.4066260  |
| C 1.0606620 0.8799300 0.7300100    | N -1.3636770 -3.0906010 0.0221160  |
| C 2.3783190 0.1348540 0.5333210    | H -1.8763300 -3.8341920 0.4685830  |
| H 1.6077160 -1.4096120 -0.7796330  | H -0.3960520 -2.9998210 0.3112200  |
| H 0.3558490 0.2184930 1.2400290    | H 1.9450360 2.3272450 -1.1048940   |
| H 2.9205840 0.1703850 1.4931620    | O -0.3684320 4.1100010 0.5024910   |
| O 3.1129420 0.8406360 -0.4565340   | H -0.3703250 5.0619360 0.6149430   |
| H 3.8056100 0.2708470 -0.8145820   | <b>pRTS5_6H<sub>2</sub>O</b>       |
| O 1.3501570 2.0155860 1.5159530    | H = -1079.117464 a.u.              |
| H 0.6286800 2.6575770 1.4516420    | G = -1079.189008 a.u.              |
| C 3.4925610 -2.1042310 0.0059930   | C -3.1070540 1.1125260 0.0475870   |
| H 3.2562670 -3.1499500 -0.2098970  | O -2.5185750 2.0880100 0.8831770   |
| H 4.0397700 -2.0556680 0.9575920   | C -0.3571300 -0.3840850 -0.0322260 |
| O 4.2634980 -1.5292310 -1.0434730  | C -1.4508300 -0.5718890 1.0223310  |
| H 5.0711600 -2.0315380 -1.1695340  | C -2.8865620 -0.3196700 0.5634000  |
| O 0.9849690 2.4457980 -1.1531090   | H -2.6132380 1.2088360 -0.9242550  |
| H 1.7120300 -1.7849680 2.0084800   | H -1.2117340 0.1800170 1.7854810   |
| H 0.6328110 0.4262360 -1.3437570   | H -3.5335300 -0.5011560 1.4348110  |
| C -1.8103520 0.3588070 -0.3947050  | O -3.2084020 -1.2642980 -0.4543450 |
| N -3.1185320 0.6128240 -0.2798600  | H -4.0675170 -1.0286970 -0.8313930 |
| C -3.8953820 -0.4550210 -0.0923300 | O -1.4084470 -1.8670580 1.5640890  |
| C -3.3915250 -1.7561380 0.0171940  | H -0.4698220 -2.0613870 1.7007470  |
| C -2.0082810 -1.8832760 -0.0917150 | C -4.5885950 1.4464340 -0.1117020  |
| N -1.2118010 -0.8345540 -0.3267270 | H -4.6770140 2.4512780 -0.5335600  |
| H -4.0368720 -2.6069510 0.1884680  | H -5.0616470 1.4352290 0.8801230   |
| N -0.9894060 1.4291920 -0.5868130  | O -5.1936530 0.4769950 -0.9599590  |
| H -1.3628680 2.3501470 -0.3963630  | H -6.1220580 0.6817180 -1.0893550  |



|                             |            |            |            |   |            |            |            |
|-----------------------------|------------|------------|------------|---|------------|------------|------------|
| O                           | -0.7766440 | -1.2268280 | -1.2880600 | H | 2.2779680  | -0.1893490 | -1.3748980 |
| H                           | -2.8595760 | 1.9892310  | 1.7781640  | H | 2.1606820  | -2.0295820 | 1.3474290  |
| H                           | -0.3194390 | 0.6374810  | -0.4110650 | H | 3.8001660  | -0.2145900 | 1.2704240  |
| C                           | 1.9827380  | -0.1585240 | 0.1914740  | O | 2.4049290  | 1.2190520  | 0.7516560  |
| N                           | 3.1383680  | -0.8449030 | 0.2948810  | H | 3.0873510  | 1.7779630  | 0.3581540  |
| C                           | 4.2614130  | -0.1534480 | 0.1163040  | O | 1.7363610  | -0.6319540 | 2.7560490  |
| C                           | 4.2788720  | 1.2129420  | -0.1740410 | H | 0.9547750  | -0.0709300 | 2.8503400  |
| C                           | 3.0262020  | 1.8174760  | -0.2726760 | C | 4.4180480  | 0.0525430  | -1.3070770 |
| N                           | 1.8852870  | 1.1547540  | -0.0871330 | H | 4.4764340  | -0.1365820 | -2.3826860 |
| H                           | 5.1986570  | 1.7562250  | -0.3425300 | H | 5.2623150  | -0.4518410 | -0.8137060 |
| N                           | 0.8571050  | -0.8954650 | 0.4108520  | O | 4.4488860  | 1.4440940  | -1.0220120 |
| H                           | 1.0313010  | -2.3050620 | -0.1634090 | H | 5.2065130  | 1.8502820  | -1.4470730 |
| H                           | -0.1488020 | -2.1216320 | -1.2790280 | O | 0.4250060  | 1.3320860  | -1.3238760 |
| N                           | 5.4309130  | -0.8793290 | 0.1870510  | H | 3.9163580  | -2.2937060 | -0.4353070 |
| H                           | 5.3337380  | -1.7715280 | 0.6478110  | H | 0.4391390  | -1.2858110 | -0.3213790 |
| H                           | 6.2754660  | -0.3731360 | 0.3979640  | C | -1.7333470 | -0.4429290 | 0.6296430  |
| N                           | 2.9007240  | 3.1488530  | -0.6060350 | N | -2.4696260 | 0.6572380  | 0.7737170  |
| H                           | 3.6889700  | 3.7466190  | -0.4181290 | C | -3.6521730 | 0.6572670  | 0.1436790  |
| H                           | 1.9966910  | 3.5439660  | -0.3965750 | C | -4.1054130 | -0.4250350 | -0.6005180 |
| H                           | -1.7357960 | -1.4531310 | -1.2095050 | C | -3.2444200 | -1.5233730 | -0.6683340 |
| O                           | 0.7698600  | -3.0371160 | -0.8807890 | N | -2.0568470 | -1.5366960 | -0.0472980 |
| H                           | 1.5411310  | -3.1704430 | -1.4392250 | H | -5.0628450 | -0.4147560 | -1.1039090 |
| <b>pRINT6<sub>H2O</sub></b> |            |            |            | N | -0.5053760 | -0.4374260 | 1.3148160  |
| H = -1079.151956 a.u.       |            |            |            | H | -1.6780440 | 2.4630730  | 0.2583780  |
| G = -1079.229249 a.u.       |            |            |            | H | -0.2463530 | 2.0278280  | -1.3107520 |
| C                           | 3.1178160  | -0.5374530 | -0.7674580 | N | -4.3716360 | 1.8312720  | 0.2381600  |
| O                           | 3.1625320  | -1.9470210 | -0.9234700 | H | -4.1508860 | 2.3840740  | 1.0553870  |
| C                           | 0.4953440  | -0.9192530 | 0.7064080  | H | -5.3555980 | 1.7781790  | 0.0249520  |
| C                           | 1.8236970  | -0.9889230 | 1.4075620  | N | -3.5524050 | -2.6363270 | -1.3892590 |
| C                           | 2.8686530  | -0.1170380 | 0.6915820  | H | -4.4959930 | -2.7910570 | -1.6985520 |

H -2.9601880 -3.4396660 -1.2542740  
H 0.9487440 1.4915090 -0.5267320  
O -1.5958080 3.1659870 -0.4062470  
H -2.4737790 3.2057610 -0.7964710

**pRINT3<sub>2H2O</sub>**

H = -1155.569731 a.u.

G = -1155.65265 a.u.

C 2.5414050 0.4228780 0.6051360  
O 1.5100430 1.3557480 0.3609120  
C 0.2992720 -1.4261790 0.3206800  
C 1.1462770 -1.1357920 -0.9009640  
C 2.5542560 -0.7096870 -0.4345820  
H 2.3060900 -0.0181410 1.5826030  
H 0.6887870 -0.3068160 -1.4439430  
H 3.1035100 -0.4015130 -1.3309980  
O 3.2758440 -1.8322600 0.0598300  
H 2.8566960 -2.1500970 0.8692600  
O 1.2228800 -2.2296770 -1.7680510  
H 1.5789640 -2.9783150 -1.2761930  
C 3.9010380 1.1094590 0.7128200  
H 3.8211800 1.9291560 1.4284350  
H 4.1559770 1.5390250 -0.2695920  
O 4.9178620 0.2510690 1.1744410  
H 4.8625500 -0.5829730 0.6942230  
O 0.1817850 -2.5395580 0.7757460  
H 1.6586750 1.8628650 -0.4479250  
H -0.1545610 -0.5508480 0.8193890  
C -1.9001910 0.3473200 -0.9136680  
N -1.1113660 1.2105890 -1.5656050  
C -0.9018050 2.3816470 -0.9602520

C -1.5082800 2.7440260 0.2356580  
C -2.3030730 1.7601480 0.8315410  
N -2.4919940 0.5565480 0.2736090  
H -1.3176890 3.6938460 0.7151770  
N -2.0414120 -0.8830670 -1.4572300  
H -1.6629270 -1.0209750 -2.3806880  
H -2.7768720 -1.5098230 -1.1330980  
N 0.0350950 3.1963720 -1.5761330  
H 0.1234960 3.0175760 -2.5675030  
H -0.0091280 4.1770350 -1.3412420  
N -2.8892140 1.9497340 2.0447000  
H -2.9332350 2.8723760 2.4404600  
H -3.5782600 1.2758490 2.3383810  
O -2.5685670 -1.8802810 1.8382960  
H -2.5358430 -1.0139060 1.3905020  
H -1.6805580 -2.2524080 1.7659260  
O -4.0464510 -2.6907580 -0.3157820  
H -4.2786770 -3.6113320 -0.4451550  
H -3.6564900 -2.6189950 0.5752430

**pRT3\_4<sub>2H2O</sub>**

H = -1155.562610 a.u.

G = -1155.639137 a.u.

C 2.7950900 -1.1347310 -0.4886290  
O 1.9264760 -2.0494090 -1.1422860  
C 0.5665560 0.7659300 0.0769550  
C 0.8210740 -0.4422190 0.9889160  
C 2.2974090 -0.8567300 0.9338070  
H 2.7610120 -0.2075640 -1.0682690  
H 0.1945840 -1.2780100 0.6741390  
H 2.4078350 -1.7715320 1.5310540

|   |            |            |            |                              |            |            |            |
|---|------------|------------|------------|------------------------------|------------|------------|------------|
| O | 3.0985730  | 0.1298660  | 1.5711400  | H                            | 1.4903100  | 2.5894290  | -0.5627280 |
| H | 2.8003750  | 0.9815940  | 1.1844820  | O                            | -1.0420860 | 3.1765380  | -1.2562650 |
| O | 0.4643120  | -0.1252370 | 2.3218300  | H                            | -1.4590030 | 3.9953610  | -0.9783880 |
| H | 1.2152030  | 0.3434790  | 2.7080820  | H                            | 0.0327330  | 3.3555710  | -1.4539220 |
| C | 4.2300030  | -1.6614760 | -0.4999270 | <b>pRINT4<sub>2H2O</sub></b> |            |            |            |
| H | 4.4790930  | -1.9520430 | -1.5226740 | H = -1155.584146 a.u.        |            |            |            |
| H | 4.2738650  | -2.5685820 | 0.1275120  | G = -1155.66547 a.u.         |            |            |            |
| O | 5.1815340  | -0.7119370 | -0.0890200 | C                            | 2.9374620  | -0.9693660 | -0.5204240 |
| H | 4.8482850  | -0.3021230 | 0.7198510  | O                            | 2.0977860  | -1.9842990 | -1.0491780 |
| O | 1.4325670  | 1.7790960  | 0.3519180  | C                            | 0.5275920  | 0.6826690  | 0.1889430  |
| H | 2.0363680  | -2.9172930 | -0.7402970 | C                            | 1.0626860  | -0.3972110 | 1.1375700  |
| H | 0.5513550  | 0.4535440  | -0.9747810 | C                            | 2.5580680  | -0.6725370 | 0.9343610  |
| C | -1.9297150 | 0.3380630  | 0.1178780  | H                            | 2.7613110  | -0.0772650 | -1.1296960 |
| N | -2.9135240 | 0.3958640  | 0.9933360  | H                            | 0.4967100  | -1.3087950 | 0.9389530  |
| C | -3.9362700 | -0.4470860 | 0.7573500  | H                            | 2.8182220  | -1.5432130 | 1.5498040  |
| C | -3.9386090 | -1.3185000 | -0.3312480 | O                            | 3.3366830  | 0.4014140  | 1.4563700  |
| C | -2.8266680 | -1.2691590 | -1.1722740 | H                            | 2.9855350  | 1.2104950  | 1.0475070  |
| N | -1.8054740 | -0.4210400 | -0.9497740 | O                            | 0.8248560  | -0.0364030 | 2.4836530  |
| H | -4.7577920 | -2.0018680 | -0.5106380 | H                            | 1.5627840  | 0.5165070  | 2.7676290  |
| N | -0.8541990 | 1.2647790  | 0.3528220  | C                            | 4.4073790  | -1.3659830 | -0.6643260 |
| H | -0.8810190 | 1.5414180  | 1.3368740  | H                            | 4.5737160  | -1.6852200 | -1.6949320 |
| H | -1.0067890 | 2.2131440  | -0.3464650 | H                            | 4.6052080  | -2.2304760 | -0.0080720 |
| N | -4.9767890 | -0.3749160 | 1.6318380  | O                            | 5.3029710  | -0.3132620 | -0.4031830 |
| H | -4.8119960 | 0.1367890  | 2.4840150  | H                            | 5.0533170  | 0.0725390  | 0.4453870  |
| H | -5.6543370 | -1.1173700 | 1.6590900  | O                            | 1.3422840  | 1.8205440  | 0.3295010  |
| N | -2.6868750 | -2.0901470 | -2.2449930 | H                            | 2.2892220  | -2.8113880 | -0.5952420 |
| H | -3.4768240 | -2.5992320 | -2.6008550 | H                            | 0.5258570  | 0.3019550  | -0.8349140 |
| H | -1.9203450 | -1.8970800 | -2.8698300 | C                            | -1.8761460 | 0.1386140  | 0.2570480  |
| O | 1.3444620  | 3.3742750  | -1.4255810 | N                            | -3.0215420 | 0.3837410  | 0.8924240  |
| H | 1.8151830  | 3.1504930  | -2.2296950 | C                            | -4.0340390 | -0.4400250 | 0.5961520  |

|                              |            |            |            |   |            |            |            |
|------------------------------|------------|------------|------------|---|------------|------------|------------|
| C                            | -3.9080390 | -1.4861930 | -0.3201010 | O | 3.2443940  | -0.9794030 | 1.0261650  |
| C                            | -2.6545180 | -1.6337040 | -0.9112120 | H | 4.1160150  | -0.7315030 | 1.3590850  |
| N                            | -1.6267280 | -0.8203160 | -0.6249360 | O | 1.5863420  | -2.3176270 | -0.8148820 |
| H                            | -4.7323590 | -2.1473320 | -0.5504150 | H | 1.5146520  | -2.6024820 | 0.1041300  |
| N                            | -0.8499920 | 1.0425030  | 0.5237050  | C | 4.9367420  | 1.2556240  | -0.2863560 |
| H                            | -0.9209190 | 1.4092060  | 1.4689850  | H | 5.0858420  | 2.3390130  | -0.2733980 |
| H                            | -1.6517170 | 2.4404200  | -0.5818780 | H | 5.4577390  | 0.8371970  | -1.1590230 |
| N                            | -5.2224230 | -0.1742270 | 1.2204980  | O | 5.4139000  | 0.6530660  | 0.9101570  |
| H                            | -5.1641600 | 0.4374400  | 2.0196710  | H | 6.3459540  | 0.8474190  | 1.0286820  |
| H                            | -5.9147210 | -0.9032260 | 1.2623330  | O | 0.5767330  | -0.6786470 | 1.2903840  |
| N                            | -2.3781940 | -2.6433420 | -1.7877350 | H | 3.3952960  | 1.0966530  | -2.3740570 |
| H                            | -3.1386880 | -3.1144930 | -2.2473660 | H | 0.7255810  | 0.8542560  | -0.1031900 |
| H                            | -1.5114610 | -2.5573080 | -2.2956740 | C | -1.7702570 | 0.1444800  | -0.4438470 |
| O                            | 0.7187340  | 3.4510130  | -1.7601380 | N | -2.9089740 | -0.4246030 | -0.8624260 |
| H                            | 0.9820820  | 3.3065350  | -2.6706490 | C | -4.0322430 | 0.2609160  | -0.6284080 |
| H                            | 1.1672660  | 2.4449210  | -0.4041800 | C | -4.0333870 | 1.5061810  | 0.0050380  |
| O                            | -1.9080270 | 3.0982450  | -1.2535650 | C | -2.7827630 | 2.0002790  | 0.3736890  |
| H                            | -2.6882470 | 3.5422670  | -0.9167210 | N | -1.6459290 | 1.3265330  | 0.1614000  |
| H                            | -0.2517830 | 3.5423050  | -1.7539660 | H | -4.9481460 | 2.0454460  | 0.2089740  |
| <b>pRINT5<sub>2H2O</sub></b> |            |            |            | N | -0.6280450 | -0.5705030 | -0.6900330 |
| H = -1155.587064 a.u.        |            |            |            | H | -0.7765920 | -1.5633390 | -0.8588060 |
| G = -1155.667959 a.u.        |            |            |            | H | -2.1250560 | -2.7795940 | 0.8636980  |
| C                            | 3.4452760  | 0.9616310  | -0.4212440 | N | -5.1945200 | -0.3471510 | -1.0099630 |
| O                            | 2.9755890  | 1.5340480  | -1.6260240 | H | -5.1024970 | -1.1377640 | -1.6278670 |
| C                            | 0.6112470  | -0.2311110 | -0.0675240 | H | -6.0290770 | 0.2070070  | -1.0966160 |
| C                            | 1.7487940  | -0.9199520 | -0.8300920 | N | -2.6507170 | 3.1960050  | 1.0278800  |
| C                            | 3.1451640  | -0.5423410 | -0.3233940 | H | -3.4002320 | 3.8640030  | 0.9631460  |
| H                            | 2.9070580  | 1.4703020  | 0.3838810  | H | -1.7148080 | 3.5678890  | 1.0653450  |
| H                            | 1.6649880  | -0.6105050 | -1.8725500 | O | -1.9520130 | -1.3937630 | 2.2756600  |
| H                            | 3.8637380  | -1.1018060 | -0.9420260 | H | -1.0695590 | -1.0551180 | 2.0530530  |

H 1.4737250 -0.6564290 1.6536580  
O -2.1663910 -3.1486010 -0.0313490  
H -2.6926450 -2.4880010 -0.4992280  
H -2.5345520 -0.6314430 2.2270470

**pRT5\_6<sub>2H2O</sub>**

H = -1155.539423 a.u.

G = -1155.615400 a.u.

C -3.2107450 -1.1652610 -0.4412210  
O -2.6876180 -1.7416250 -1.6196950  
C -0.4246350 0.1474360 -0.1069290  
C -1.5952060 0.7987000 -0.8499990  
C -2.9855840 0.3521100 -0.3830280  
H -2.6671580 -1.6272460 0.3878670  
H -1.4686610 0.5017140 -1.8923410  
H -3.7141540 0.8564060 -1.0353850  
O -3.1560970 0.8295760 0.9524460  
H -4.0198520 0.5355430 1.2713490  
O -1.5216290 2.2044670 -0.8311550  
H -1.7144160 2.5216000 0.0586150  
C -4.6898220 -1.5253970 -0.3296760  
H -4.7876040 -2.6135040 -0.2831850  
H -5.2112430 -1.1609490 -1.2256130  
O -5.2220830 -0.9080430 0.8374230  
H -6.1405920 -1.1589660 0.9547880  
O -0.5624700 0.6001380 1.4008190  
H -3.0831750 -1.3188210 -2.3888980  
H -0.5275710 -0.9363480 -0.0200380  
C 1.8856470 -0.1467700 -0.2892040  
N 3.0648160 0.4441120 -0.6036170  
C 4.1699370 -0.2527670 -0.3568330

C 4.1576930 -1.5302700 0.2059270  
C 2.8925920 -2.0381410 0.5032080  
N 1.7667640 -1.3695670 0.2675320  
H 5.0662350 -2.0734530 0.4274070  
N 0.7860920 0.5921220 -0.5762870  
H 1.1550740 2.0958320 -0.7679530  
H 0.9604550 3.0137060 0.6979740  
N 5.3620290 0.3810140 -0.6481900  
H 5.2700930 1.1428040 -1.3033440  
H 6.1633770 -0.2106630 -0.7981540  
N 2.7477410 -3.2699290 1.1075090  
H 3.4940840 -3.9334060 0.9768890  
H 1.8161920 -3.6512860 1.0434430  
O 0.3798570 2.8199920 1.5922980  
H -0.0878410 1.6162610 1.5243410  
H -1.5090240 0.6385300 1.6410150  
O 1.5566080 3.0325310 -0.5395550  
H 2.4949340 2.8053350 -0.5169000  
H 0.9269250 2.9784980 2.3653730

**pPRINT6<sub>2H2O</sub>**

H = -1155.567965 a.u.

G = -1155.652378 a.u.

C -3.3976410 -1.0528070 -0.3316890  
O -3.5221580 -1.4649770 -1.6809480  
C -0.4859540 -0.0417250 -0.7917040  
C -1.7302430 0.7349850 -1.1549020  
C -2.8820340 0.3902530 -0.2016960  
H -2.6717680 -1.7289440 0.1268000  
H -2.0246650 0.4208460 -2.1622500  
H -3.7008060 1.0841100 -0.4498550

|   |            |            |            |             |             |            |            |
|---|------------|------------|------------|-------------|-------------|------------|------------|
| O | -2.4172510 | 0.6418460  | 1.1123870  | H           | -0.6131190  | 0.3093790  | 1.9555960  |
| H | -3.1303670 | 0.4309430  | 1.7285900  | O           | 1.9946490   | 3.1036190  | -1.0057180 |
| O | -1.5176340 | 2.1153620  | -1.1989500 | H           | 2.4336760   | 2.2847860  | -0.7039260 |
| H | -1.0804380 | 2.3920370  | -0.3726410 | H           | -0.0408530  | 3.8279740  | 1.4336240  |
| C | -4.7505470 | -1.2362680 | 0.3520810  | <b>mTS1</b> |             |            |            |
| H | -5.0282190 | -2.2933970 | 0.3078490  | H =         | -735.654445 | a.u.       |            |
| H | -5.5022190 | -0.6514780 | -0.1973590 | G =         | -735.708417 | a.u.       |            |
| O | -4.6566340 | -0.7817230 | 1.6952230  | C           | -1.1730960  | -0.2299320 | 0.8663000  |
| H | -5.4839380 | -0.9379800 | 2.1550390  | C           | -1.3358800  | -1.7345030 | 1.1046640  |
| O | 0.3141810  | 0.4054080  | 2.2017130  | H           | -0.3923370  | -2.2815620 | 1.1535300  |
| H | -4.1339480 | -0.8757760 | -2.1344470 | O           | -2.1117910  | -2.2722360 | 0.0445200  |
| H | -0.6023310 | -1.0565630 | -0.4011140 | H           | -2.8161860  | -1.6104600 | -0.0630680 |
| C | 1.7750570  | -0.2759380 | -0.5063760 | O           | -2.4198160  | 0.2572290  | 0.6381860  |
| N | 2.8231790  | 0.4754090  | -0.1774720 | H           | -0.6639380  | 0.2171370  | 1.7376550  |
| C | 3.9110020  | -0.1777870 | 0.2603900  | C           | 2.4685180   | 0.1829000  | 0.1764400  |
| C | 3.9514290  | -1.5682710 | 0.3347480  | N           | 1.8304390   | 1.3464890  | 0.2421080  |
| C | 2.8015160  | -2.2427720 | -0.0747860 | C           | 0.5508350   | 1.3538060  | -0.1565510 |
| N | 1.7072220  | -1.5969650 | -0.5028170 | C           | -0.1975860  | 0.0747230  | -0.4102650 |
| H | 4.8243310  | -2.0944550 | 0.6971240  | C           | 0.7732400   | -1.0260670 | -0.7094940 |
| N | 0.6576760  | 0.4824940  | -0.9276550 | N           | 2.0354170   | -0.9913290 | -0.3621460 |
| H | 1.3329480  | 2.7502960  | -1.6141670 | H           | -0.8854460  | 0.1930170  | -1.2483740 |
| H | 0.8676030  | 3.2147960  | 0.3177570  | N           | 3.7172790   | 0.1487410  | 0.6561670  |
| N | 4.9632270  | 0.5987590  | 0.6480520  | H           | 4.1204940   | 0.9893780  | 1.0348060  |
| H | 4.9254870  | 1.5736500  | 0.3968080  | H           | 4.2514630   | -0.6999230 | 0.5770480  |
| H | 5.8730760  | 0.1827850  | 0.7472650  | N           | -0.0853300  | 2.4863680  | -0.2608610 |
| N | 2.7149690  | -3.6039750 | -0.0375590 | H           | 0.4489860   | 3.3047210  | 0.0031010  |
| H | 3.5546860  | -4.1521990 | 0.0326530  | H           | -1.1841310  | 2.5345620  | -0.4780610 |
| H | 1.9287010  | -4.0139100 | -0.5151020 | N           | 0.3133720   | -2.0997820 | -1.3536980 |
| O | 0.1226210  | 3.0268730  | 0.9315700  | H           | 0.9510400   | -2.8769820 | -1.4491340 |
| H | 0.5105510  | 1.2937740  | 1.8753020  | H           | -0.6866010  | -2.2909470 | -1.3248740 |

O -2.5705080 2.3591510 -0.4912790  
H -2.5579040 1.3397920 0.0768830  
H -3.1035170 2.3259630 -1.2865130  
H -1.8594250 -1.8568330 2.0580350

**mTS1<sub>O</sub>**

H = -755.531585 a.u.

G = -755.585909 a.u.

C -1.2279010 -0.2396340 0.9820000  
C -1.3158800 -1.7608310 1.0982490  
H -0.3493000 -2.2657930 1.0773270  
O -2.1086600 -2.2491140 0.0319340  
H -2.8325030 -1.6052170 -0.0271590  
O -2.3962700 0.2791820 0.7616060  
H -0.6055540 0.2056660 1.7763470  
C 2.4453620 0.1730100 0.1896700  
N 1.7962260 1.3466760 0.2538830  
C 0.5466870 1.3466950 -0.1653380  
C -0.1627710 0.1038720 -0.4902860  
C 0.7659710 -0.9915810 -0.7641310  
N 2.0215400 -0.9866050 -0.3546390  
H -0.9469160 0.2090410 -1.2334830  
N 3.6831300 0.1607020 0.6965940  
H 4.0633130 1.0136790 1.0723420  
H 4.2369210 -0.6764200 0.6291360  
H -1.0460160 2.4557350 -0.4718290  
N 0.3242240 -2.0690430 -1.4253180  
H 0.9573470 -2.8535920 -1.4771790  
H -0.6738190 -2.2582150 -1.4248790  
O -2.5037860 2.3585650 -0.5775830  
H -2.6029770 1.5207840 0.0125750

H -3.0124370 2.2524620 -1.3825520  
H -1.7951090 -1.9718480 2.0619030  
O -0.0509830 2.4891690 -0.2043530

**mTS1<sub>S</sub>**

H = -1078.473137 a.u.

G = -1078.529031 a.u.

C 1.0390510 0.5702830 0.9909880  
C 0.9731010 2.0986590 1.1065500  
H -0.0326590 2.5144750 1.0280600  
O 1.7771900 2.6567040 0.0813620  
H 2.5635560 2.0854260 0.0900360  
O 2.3004250 0.2036620 0.8651140  
H 0.4712100 0.0930330 1.8086610  
C -2.4865900 -0.1668520 0.1550060  
N -1.7534280 -1.2926270 0.2750110  
C -0.4933010 -1.2242240 -0.0998350  
C 0.1445010 0.0746690 -0.4187930  
C -0.8724410 1.0727680 -0.8084160  
N -2.1405880 0.9834830 -0.4544430  
H 0.9348880 -0.0051070 -1.1604640  
N -3.7220170 -0.2221110 0.6561930  
H -4.0379920 -1.0794240 1.0795010  
H -4.3335760 0.5709010 0.5565640  
H 1.6776560 -2.1987810 -0.5050660  
N -0.4897000 2.1365300 -1.5170530  
H -1.1808210 2.8614740 -1.6486170  
H 0.4886040 2.4114660 -1.4773520  
O 3.0206410 -1.6207510 -0.5930010  
H 2.7956640 -0.8216180 0.0580290  
H 3.4180630 -1.2874920 -1.4001840

H 1.3779280 2.3555790 2.0918800  
S 0.3741010 -2.7003500 -0.1012380

**mTS2**

H = -795.311124 a.u.

G = -795.366615 a.u.

C 1.4397800 -0.1324210 -0.8612780  
C 2.2348720 -1.4006460 -0.6936630  
H 1.5953490 -2.2529040 -0.4639870  
O 3.1974920 -1.2748540 0.3123350  
H 3.5562220 -0.3814280 0.2640870  
O 2.0492880 0.9443640 -0.6363870  
H 0.5762920 -0.1460170 -1.5374340  
C -0.5269270 0.7950460 0.8952820  
C 0.0274100 -0.4928820 0.9025090  
O 0.9099890 3.0421500 -0.4546730  
H 1.4903340 2.1022020 -0.6731780  
H 1.4874950 3.7923840 -0.2827380  
H 2.6963430 -1.5752620 -1.6812710  
N -1.7024780 0.9884410 0.1927800  
H -2.1081620 1.9152890 0.1878620  
C -2.4898550 -0.0135470 -0.3675550  
O -3.5429490 0.2174680 -0.9056280  
N -1.9366580 -1.2673900 -0.2535550  
H -2.4903260 -2.0331160 -0.6164430  
C -0.7465270 -1.6140940 0.4151580  
H 0.8577200 -0.6956770 1.5650950  
O -0.4212920 -2.7824800 0.4703990  
O 0.0250940 1.8181290 1.3956070  
H 0.4391830 2.6602330 0.4674950

**mTS3**

H = -795.296028 a.u.

G = -795.350469 a.u.

C -1.2576940 -0.1631240 -0.9012580  
C -2.5314530 0.6409440 -0.8132000  
H -2.3182410 1.6917930 -0.6162740  
O -3.3601850 0.1469740 0.2082540  
H -3.4755760 -0.7966630 0.0517710  
O -1.3617630 -1.4141780 -0.7360620  
H -0.4439800 0.2279590 -1.5258000  
C 0.3931970 -0.4150230 1.1156660  
C -0.3260000 0.7599690 0.8836640  
O 0.7162530 -2.6580810 -0.7911200  
H -0.2885530 -2.1412310 -0.8245170  
H 0.6606340 -3.5262380 -0.3784660  
H -3.0160270 0.5649000 -1.7989440  
N 1.5444940 -0.7345840 0.5482830  
H 1.2929630 -1.9763100 -0.1681370  
C 2.2384700 0.2431920 -0.1596620  
O 3.2853060 0.0252120 -0.7157470  
N 1.6412910 1.5063920 -0.2240690  
H 2.1587630 2.2145790 -0.7298570  
C 0.3735320 1.8541880 0.2310420  
H -1.2074240 1.0005640 1.4643040  
O -0.0977170 2.9531360 0.0193950  
O -0.1722640 -1.4265860 1.7790110  
H -1.0804060 -1.1947060 2.0090700

**mTS4**

H = -717.147647 a.u.

G = -717.200611 a.u.

C 1.7232880 -0.0656580 -0.6485530



|   |            |            |            |   |            |            |            |
|---|------------|------------|------------|---|------------|------------|------------|
| C | 2.5279190  | -1.3352220 | -0.7167100 | H | 1.0397510  | 1.8610030  | -0.7075680 |
| H | 1.8940520  | -2.1958720 | -0.5219090 | O | 3.2170010  | 0.3321810  | -0.1878240 |
| O | 3.5809390  | -1.3411990 | 0.2039380  | H | 2.4310810  | -0.4601690 | 1.5124980  |
| H | 4.0903150  | -0.5319510 | 0.0923380  | N | -0.3564750 | -1.4357080 | 0.6712420  |
| O | 2.4398820  | 0.9891530  | -0.4609290 | C | 0.6425220  | -0.9149100 | -0.1522400 |
| H | 0.7960180  | 0.0148570  | -1.2230550 | N | 0.1280580  | 0.0426910  | -0.9205790 |
| N | -0.1640470 | 0.8530750  | 0.9794940  | C | -1.2157320 | 0.1197640  | -0.6164080 |
| C | 0.5676880  | -0.3096960 | 1.1003220  | C | -2.2708890 | 0.9086120  | -1.0665370 |
| N | -0.0793520 | -1.4471450 | 0.7359670  | N | -3.4885850 | 0.7437540  | -0.5580460 |
| C | -1.2619100 | -0.9893170 | 0.3027230  | C | -3.6587440 | -0.1926140 | 0.3877510  |
| C | -2.3946300 | -1.6119720 | -0.2711990 | N | -2.7413430 | -1.0034930 | 0.9086340  |
| N | -3.4239920 | -0.8862460 | -0.6291440 | C | -1.5377860 | -0.8105110 | 0.3854780  |
| C | -3.3563700 | 0.4699880  | -0.4389440 | H | 1.9847470  | -1.6785630 | -0.5558020 |
| N | -2.3790990 | 1.1761700  | 0.0688960  | H | -4.6668050 | -0.2987590 | 0.7738710  |
| C | -1.3172870 | 0.4282520  | 0.4549790  | H | -0.2582290 | -2.2093160 | 1.3097040  |
| H | 1.4690930  | -0.3518530 | 1.7025120  | O | 3.0103330  | -1.9092020 | -0.8472110 |
| H | -4.2400700 | 1.0135950  | -0.7575960 | H | 3.4022090  | -0.7389780 | -0.4859020 |
| H | 0.3549250  | 2.4211620  | 0.3971170  | H | 3.3245860  | -2.7064350 | -0.4147150 |
| O | 0.9227620  | 2.9340040  | -0.2411720 | H | -2.1405280 | 1.6656730  | -1.8341790 |
| H | 1.8909140  | 1.8724820  | -0.4527840 | H | 2.2162790  | 2.1144420  | 1.8336050  |
| H | 1.1438300  | 3.7857400  | 0.1422760  |   |            |            |            |
| H | -2.4453140 | -2.6880100 | -0.4180280 |   |            |            |            |
| H | 2.8908140  | -1.3850470 | -1.7577680 |   |            |            |            |

### mTS5

H = -717.124707 a.u.

G = -717.178000 a.u.

|   |           |           |            |
|---|-----------|-----------|------------|
| C | 2.3909550 | 0.3300250 | 0.7565280  |
| C | 1.6218420 | 1.5755100 | 1.0825620  |
| H | 0.6820480 | 1.2752650 | 1.5668870  |
| O | 1.4427000 | 2.4082550 | -0.0112110 |

### mTS6

H = -720.054381 a.u.

G = -720.107534 a.u.

|   |           |            |            |
|---|-----------|------------|------------|
| C | 1.2707920 | 0.4959650  | -0.6368720 |
| C | 2.4972410 | -0.3576880 | -0.7200200 |
| H | 2.2344620 | -1.4130740 | -0.6303900 |
| O | 3.4400370 | -0.0350310 | 0.2585210  |
| H | 3.5609040 | 0.9200640  | 0.2702300  |
| O | 1.4043110 | 1.6906870  | -0.2586380 |
| H | 0.3803840 | 0.2158160  | -1.2099110 |

|   |            |            |            |   |            |            |            |
|---|------------|------------|------------|---|------------|------------|------------|
| C | -0.4866300 | 0.2882570  | 1.4045610  | H | -2.7040650 | -1.1238850 | 0.1992350  |
| C | 0.2514740  | -0.8432150 | 1.1132300  | H | -2.7197810 | -2.6664000 | -0.5044750 |
| H | -0.0757570 | 1.0016560  | 2.1181020  | H | -2.0275450 | 2.4391550  | -1.2265270 |
| O | -0.7323740 | 2.7884710  | -0.2644770 | N | 1.9532790  | -0.4786910 | -1.2200540 |
| H | 0.4253720  | 2.3029790  | -0.2790380 | H | 2.5978770  | -0.5432470 | -1.9966730 |
| H | -0.8900250 | 3.6923330  | 0.0187320  | C | 2.5481480  | -0.0923530 | 0.0018580  |
| H | 2.8856820  | -0.1976560 | -1.7420450 | O | 3.7265370  | 0.1310370  | 0.0719660  |
| N | -1.5976190 | 0.6860710  | 0.7906710  | N | 1.6527720  | -0.0184460 | 1.0296960  |
| H | -1.3334490 | 2.0822680  | 0.2386540  | H | 2.0335210  | 0.2435960  | 1.9316810  |
| C | -2.1869220 | -0.1728550 | -0.1302520 | C | 0.2664250  | -0.3035130 | 0.9959440  |
| O | -3.1914340 | 0.0995040  | -0.7438850 | H | -1.1595910 | -1.5534200 | -0.2321110 |
| N | -1.5259410 | -1.3896610 | -0.3541580 | O | -0.3630940 | -0.2995020 | 2.0183810  |
| H | -1.9626740 | -2.0089390 | -1.0265750 |   |            |            |            |
| C | -0.3027930 | -1.7982120 | 0.1731080  |   |            |            |            |
| H | 1.1321760  | -1.1145550 | 1.6782440  |   |            |            |            |
| O | 0.2355680  | -2.8222900 | -0.2057860 |   |            |            |            |

### **mTS7**

H = -720.028635 a.u.

G = -720.080912 a.u.

|   |            |            |            |
|---|------------|------------|------------|
| C | -1.7282060 | 0.3901890  | -0.8176990 |
| C | -1.2069680 | 1.8215150  | -0.8346290 |
| H | -0.3435550 | 1.9275550  | -1.4969070 |
| O | -0.8205130 | 2.2365000  | 0.4481900  |
| H | -1.4790820 | 1.8827280  | 1.0634280  |
| O | -2.6808140 | 0.1936770  | 0.0386760  |
| H | -1.8721410 | -0.0120780 | -1.8393940 |
| C | 0.6378110  | -0.7120280 | -1.3653070 |
| C | -0.2749500 | -0.6179710 | -0.3461180 |
| H | 0.3252090  | -0.9514240 | -2.3794040 |
| O | -2.2804610 | -2.1464200 | 0.1739560  |
